# Supplementary material for: Uncertainty in non-CO2 greenhouse gas mitigation: Make-or-break for global climate policy feasibility
Source: Research Square preprint supplement (doi:10.21203/rs.3.rs-2238789/v1), 2023-01-09
Supplement: Supplementary file 1 [file d1d32165599feddd8c2f3517.xlsx]

## Sheet: Information
	Content:			CH4 and N2O Marginal Abatement Cost (MAC) curves. All major emission sources. Three levels of mitigation potential: optimistic (high maximum mitigation), default and pessimistic (low maximum mitigation). 2020-2100 period.
	Contact corresponding author:			mathijs.harmsen@pbl.nl, mathijsharmsen@gmail.com
	Data specifications and implementation
	Note (!) that the MAC curves are baseline-independent; Values represent relative reductions compared to the global average emission factor in 2015 for the emission source concerned.
	In other words, for any given emission source, % values in the MACs correspond to a certain emission factor/emission intensity. Regions with the same maximum % value are projected to be able to reach the same emission factor at maximum reduction.
	The MACs can therefore be modified tby replacing relative reductions by emission factors, when you have the source-specific global emssion factors for 2015. This can be native model-based, or you could use the emission factors from the IMAGE model, see sheet "Global_mean_EFs_2015_IMAGE".
	Negative values represent a higher (regional) emission factor than the global average in 2015. So, this occurs in high emission-intensity regions, where prompt lowering of emission factors to the global average is unlikely.
	Negative values are provided for several non-agricultural sources. For agricultural sectors, regional differences in emission-intensities obviously also exist, but this is not reflected in the MACs' reduction potentials (due to a different construction approach).
	Teams are therefore advised to avoid rapid changes in relative emission reductions, by accounting for inertia, e.g. by introducting a maximum yearly allowed change in relative reduction (as is done in IMAGE).
	In the long term and at very high prices, the regional reduction potentials converge, unless biophysical differences (mainly climatic) are known to lead to differences in long-term mitigation potentials (e.g. one can't introduce Holstein cows, with relatively favourable production/methane ratios, in hotter regions).
	Note: F-gases are excluded in this dataset. In the analyses of the MAC uncertainty implications it was found that, there is even relatively high F-gas mitigation with pessimistic assumptions, implying that F-gas uncertainly has influence on overall uncertainty.
	F-gas mitigation potential projections are also similar to those in Harmsen et al. 2019 (so interested teams could use that dataset). Another reason to exlude F-gases here is that mitigation potentials are based on a different approach that that of CH4 and N2O. Emissions directly constitute activities, and both emissions and reductions are baseline-dependent (GDP and population-based). So, the pr…
	Implementation of the MAC curves in models
	In order to implement the MACs, model teams need to know: global, regional and source-specific emission factors in time (to compensate for reduction in the baseline and simulate regional convergence at high prices). See emission source definition and region specification below. For questions, please contact: Mathijs Harmsen (mathijs.harmsen@pbl.nl).
	Conversions
	Note (!): Implementation costs are provided in (2010) $ / tonne of C equivalents, assuming the use of the AR4 100 yr GWP potential
	Mass conversion factor C / CO2				C	CO2
					1	3.66667
	$ Conversion factor to the year 2015:				2010	2015
					1	1.1165
	AR4 100 year global warming potentials				CO2	CH4	N2O
					1	25	298
	Aggregated world regions, see for classification:
	http://models.pbl.nl/image/index.php/Region_classification_map
	Abreviations source names in sheets				Colour coding in sheet names
	CH4_coal	CH4 from coal (losses/leakages energy production only)			Source_D	Default mitigation potential
	CH4_oilp	CH4 from oil (losses/leakages energy production only)			Source_O	Optimistic mitigation potential
	CH4_ngas	CH4 from gas (losses/leakages energy production only)			Source_P	Pessimistic mitagation potential
	CH4_land	CH4 from landfills
	CH4_sewa	CH4 from domestic sewage
	CH4_rice	CH4 from wetland rice production
	CH4_entf	CH4 from animals / enteric fermentation
	CH4_manu	CH4 from animal waste / manure
	N2O_tran	N2O from transport
	N2O_adip	N2O from adipic acid production
	N2O_nitr	N2O from nitric acid production
	N2O_fert	N2O from fertilizer use
	N2O_manu	N2O from animal waste / manure
	N2O_sewa	N2O Domestic sewage

## Sheet: Global_mean_EFs_2015_IMAGE
Info:
gl_mean"…"_EF data represents the source-specific global mean emission factors for the IMAGE SSP (update from 2021: https://eartharxiv.org/repository/view/2759/)
The 2015 global mean emission factors are the base year emission factors and therefore the only values one needs to calculate the projected regional mitigation potentials (2010 values are just shown for comparison).
Source	Global mean emission factor values		Emission factor unit (all global totals per year)	Varable name in IMAGE
	2010	2015
CH4 from coal (losses/leakages energy production only)	0.000221858	0.000236478	Mt CH4 from coal /PJ coal	gl_mean_CH4_coalp_EF
CH4 from oil (losses/leakages energy production only)	0.000299595	0.000297991	Mt CH4 from oil /PJ oil (LLF&HLF)	gl_mean_CH4_oilp_EF
CH4 from gas (losses/leakages energy production only)	0.000309082	0.000272335	Mt CH4 from natural gas /PJ natural gas	gl_mean_CH4_gasp_EF
CH4 from landfills	0.00863291	0.00840814	Mt CH4 from landfills / million people (urban population)	gl_mean_CH4_landf_EF
CH4 from sewage / wastewater	0.0036842	0.00370295	Mt CH4 from wastewater / million people	gl_mean_CH4_sewa_EF
CH4 from wetland rice production	5.24062e-05	4.98672e-05	Mt CH4 from rice / kt rice (dry matter)	gl_mean_CH4_rice_EF
CH4 from animals / enteric fermentation	0.00078863	0.000753462	Mt CH4 from ruminants enteric fermentation (beef/mutton) / kt beef/mutton (dry matter)	gl_mean_CH4_entf_EF
CH4 from animal waste	4.11758e-05	3.87141e-05	Mt CH4 from manure (all livestock) / kt livestock (dry matter)	gl_mean_CH4_manu_EF
N2O from transport	1.07561	1.07561	kg N/TJ LLF road transport (average of all regional emission factors (in IMAGE: in emission factor file EMFN2O))	gl_mean_N2O_tran_EF
N2O from adipic acid production	0.000129421	0.000128791	Mt N (in N2O) from adipic adid production/ Gt Adipic acid	gl_mean_N2O_adip_EF
N2O from nitric acid production	1.17663e-05	1.21075e-05	Mt N (in N2O) from nitric adid production/ Gt Nitric acid	gl_mean_N2O_nitr_EF
N2O from fertilizer use	1e-05	1e-05	Mt N (in N2O) from fertilizer application / kt N in produced fertilizer	gl_mean_N2O_fert_EF
N2O from animal waste	7.32736e-06	6.96091e-06	Mt N (in N2O) from manure (all livestock) / kt livestock (dry matter)	gl_mean_N2O_manu_EF
N2O Domestic sewage	2.59018e-05	2.56896e-05	Mt N (in N2O) from wastewater /million people	gl_mean_N2O_sewa_EF

## Sheet: CH4_coal_D
t	Implementation costs	Canada	USA	Mexico	Central America	Brazil	Rest of South-America	North Africa	West Africa	East Africa	South Africa	West Europe	Central Europe	Turkey	Ukraine	Kazachstan	Russia	Middle East	India	Korea	China+	South East Asia	Indonesia	Japan	Oceania	Rest of South Asia	Rest of South Africa
2020	0	0	0	0	0	0	0	0	0	0	0	0	0	0	0	0	0	0	0	0	0	0	0	0	0	0	0
2020	20	0.189131	0.144959	0	0	0	0	0	0	0	0	0	0.0017922	0	0	0.0670674	0.0526648	0	0	0	0	0	0	0	0.159281	0	0
2020	40	0.189131	0.144959	0.0612107	0.0613583	0.0815159	0.0607767	0.0613583	0.0613583	0.0613583	0.0613583	0.432787	0.144523	0.138913	0	0.0671665	0.0737294	0.0861824	0	0.0612107	0.0498875	0.0437561	0.0612107	0.0612107	0.159281	0.0377645	0
2020	60	0.189131	0.145439	0.0612107	0.0613583	0.0815159	0.0607767	0.0613583	0.0613583	0.0613583	0.0613583	0.447147	0.157899	0.155792	0	0.0671665	0.0737342	0.0861824	0	0.0612107	0.0498875	0.0612567	0.0612107	0.0612107	0.159281	0.0526816	0
2020	80	0.205729	0.145439	0.0612107	0.0613749	0.0868169	0.0624632	0.0613749	0.0613749	0.0613749	0.0613749	0.447147	0.186701	0.155792	0	0.0976344	0.0799575	0.0900225	0.00325907	0.0612107	0.0704552	0.0682816	0.0612107	0.0612107	0.159281	0.0705174	0
2020	100	0.205729	0.145439	0.0612107	0.0613749	0.0868169	0.0624632	0.0613749	0.0613749	0.0613749	0.0613749	0.447147	0.194055	0.155792	0	0.0976344	0.0799718	0.0900225	0.00325907	0.0612107	0.0704552	0.0682816	0.0612107	0.0612107	0.164802	0.0914254	0
2020	120	0.205729	0.145439	0.0612107	0.0613749	0.0868169	0.0624632	0.0613749	0.0613749	0.0613749	0.0613749	0.447147	0.194055	0.155792	0	0.0977193	0.0799718	0.0900225	0.00325907	0.0612107	0.0704552	0.0682816	0.0612107	0.0612107	0.204353	0.0914254	0
2020	140	0.205729	0.195054	0.0612107	0.0613749	0.0868169	0.0624632	0.0613749	0.0613749	0.0613749	0.0613749	0.494579	0.194055	0.155792	0	0.0977193	0.0799718	0.0900225	0.00325907	0.0612107	0.0704552	0.0682816	0.0612107	0.0612107	0.204353	0.0914254	0
2020	160	0.205729	0.195054	0.0612107	0.0613749	0.0868169	0.0624632	0.0613749	0.0613749	0.0613749	0.0613749	0.504326	0.194055	0.206431	0	0.0977193	0.0799718	0.0900225	0.00325907	0.0612107	0.0704552	0.0682816	0.0612107	0.0612107	0.204353	0.0914254	0
2020	180	0.205729	0.195054	0.0612107	0.0613749	0.0868169	0.0624632	0.0613749	0.0613749	0.0613749	0.0613749	0.504326	0.194055	0.206431	0	0.0977193	0.0799718	0.0900225	0.00325907	0.0612107	0.0704552	0.0682816	0.0612107	0.0612107	0.20483	0.0914254	0
2020	200	0.205729	0.195054	0.0612107	0.0613749	0.0868169	0.0625124	0.0613749	0.0613749	0.0613749	0.0613749	0.504326	0.198454	0.206431	0	0.0977193	0.0799718	0.0900225	0.00325907	0.113677	0.0704552	0.0682816	0.0612107	0.0612107	0.20483	0.0914254	0
2020	220	0.205729	0.195054	0.0612107	0.0613749	0.0868169	0.0625124	0.0613749	0.0613749	0.0613749	0.0613749	0.504326	0.198454	0.206431	0	0.174683	0.0799718	0.0900225	0.00325907	0.113677	0.0704552	0.0705895	0.0612107	0.0612107	0.20483	0.0914254	0
2020	240	0.205729	0.195054	0.113677	0.0613749	0.156688	0.0625124	0.0613749	0.0613749	0.0613749	0.0613749	0.508215	0.198454	0.206431	0	0.174683	0.0799718	0.0900225	0.00325907	0.113677	0.118785	0.0705895	0.0612107	0.0612107	0.20483	0.115269	0
2020	260	0.205729	0.195054	0.113677	0.0613749	0.156688	0.113677	0.0613749	0.0613749	0.0613749	0.0613749	0.508215	0.198454	0.206431	0	0.174683	0.118566	0.163893	0.00325907	0.113677	0.118785	0.113758	0.113677	0.113677	0.20483	0.115269	0
2020	280	0.205729	0.195054	0.113677	0.113968	0.156688	0.113677	0.113968	0.113968	0.113968	0.113968	0.508215	0.198454	0.206431	0	0.174895	0.118566	0.163893	0.00325907	0.113677	0.118785	0.113758	0.113677	0.113677	0.20483	0.115269	0
2020	300	0.205729	0.195054	0.113677	0.113968	0.156688	0.113677	0.113968	0.113968	0.113968	0.113968	0.508215	0.198454	0.206431	0	0.174895	0.118566	0.163893	0.00325907	0.113677	0.118785	0.113758	0.113677	0.113677	0.20483	0.115269	0
2020	320	0.205729	0.195054	0.113677	0.113968	0.156688	0.113677	0.113968	0.113968	0.113968	0.113968	0.51993	0.198454	0.206431	0	0.174895	0.118566	0.163893	0.00325907	0.113677	0.118785	0.113758	0.113677	0.113677	0.20483	0.115269	0
2020	340	0.205729	0.195054	0.113677	0.113968	0.156688	0.113677	0.113968	0.113968	0.113968	0.113968	0.51993	0.198454	0.206431	0	0.174895	0.118566	0.163893	0.00325907	0.113677	0.118785	0.113758	0.113677	0.113677	0.20483	0.115269	0
2020	360	0.205729	0.195054	0.113677	0.113968	0.156688	0.113677	0.113968	0.113968	0.113968	0.113968	0.51993	0.198454	0.206431	0	0.174895	0.118566	0.163893	0.00325907	0.113677	0.118785	0.113758	0.113677	0.113677	0.20483	0.115269	0
2020	380	0.205729	0.195054	0.113677	0.113968	0.156688	0.113677	0.113968	0.113968	0.113968	0.113968	0.51993	0.198454	0.206431	0	0.174895	0.118566	0.163893	0.00325907	0.113677	0.118785	0.113758	0.113677	0.113677	0.20483	0.115269	0
2020	400	0.205729	0.195054	0.113677	0.113968	0.156688	0.113677	0.113968	0.113968	0.113968	0.113968	0.51993	0.198454	0.206431	0	0.174895	0.118566	0.163893	0.00325907	0.113677	0.118785	0.113758	0.113677	0.113677	0.20483	0.115269	0
2020	420	0.205729	0.195054	0.113677	0.113968	0.156688	0.113677	0.113968	0.113968	0.113968	0.113968	0.51993	0.198454	0.206431	0	0.174895	0.118566	0.163893	0.00325907	0.113677	0.118785	0.113758	0.113677	0.113677	0.20483	0.115269	0
2020	440	0.205729	0.195054	0.113677	0.113968	0.156688	0.113677	0.113968	0.113968	0.113968	0.113968	0.51993	0.198454	0.206431	0	0.174895	0.118566	0.163893	0.00325907	0.113677	0.118785	0.113758	0.113677	0.113677	0.20483	0.115269	0
2020	460	0.205729	0.195054	0.113677	0.113968	0.156688	0.113677	0.113968	0.113968	0.113968	0.113968	0.51993	0.198454	0.206431	0	0.174895	0.118566	0.163893	0.00325907	0.113677	0.118785	0.113758	0.113677	0.113677	0.20483	0.115269	0
2020	480	0.205729	0.195054	0.113677	0.113968	0.156688	0.113677	0.113968	0.113968	0.113968	0.113968	0.51993	0.198454	0.206431	0	0.174895	0.118566	0.163893	0.00325907	0.113677	0.118785	0.113758	0.113677	0.113677	0.20483	0.115269	0
2020	500	0.205729	0.195054	0.113677	0.113968	0.156688	0.113677	0.113968	0.113968	0.113968	0.113968	0.51993	0.198454	0.206431	0	0.174895	0.118566	0.163893	0.00325907	0.113677	0.118785	0.113758	0.113677	0.113677	0.20483	0.115269	0
2020	520	0.205729	0.195054	0.113677	0.113968	0.156688	0.113677	0.113968	0.113968	0.113968	0.113968	0.51993	0.198454	0.206431	0	0.174895	0.118566	0.163893	0.00325907	0.113677	0.118785	0.113758	0.113677	0.113677	0.20483	0.115269	0
2020	540	0.205729	0.195054	0.113677	0.113968	0.156688	0.113677	0.113968	0.113968	0.113968	0.113968	0.51993	0.198454	0.206431	0	0.174895	0.118566	0.163893	0.00325907	0.113677	0.118785	0.113758	0.113677	0.113677	0.20483	0.115269	0
2020	560	0.205729	0.195054	0.113677	0.113968	0.156688	0.113677	0.113968	0.113968	0.113968	0.113968	0.51993	0.198454	0.206431	0	0.174895	0.118566	0.163893	0.00325907	0.113677	0.118785	0.113758	0.113677	0.113677	0.20483	0.115269	0
2020	580	0.205729	0.195054	0.113677	0.113968	0.156688	0.113677	0.113968	0.113968	0.113968	0.113968	0.51993	0.198454	0.206431	0	0.174895	0.118566	0.163893	0.00325907	0.113677	0.118785	0.113758	0.113677	0.113677	0.20483	0.115269	0
2020	600	0.205729	0.195054	0.113677	0.113968	0.156688	0.113677	0.113968	0.113968	0.113968	0.113968	0.51993	0.198454	0.206431	0	0.174895	0.118566	0.163893	0.00325907	0.113677	0.118785	0.113758	0.113677	0.113677	0.20483	0.115269	0
2020	620	0.205729	0.195054	0.113677	0.113968	0.156688	0.113677	0.113968	0.113968	0.113968	0.113968	0.51993	0.198454	0.206431	0	0.174895	0.118566	0.163893	0.00325907	0.113677	0.118785	0.113758	0.113677	0.113677	0.20483	0.115269	0
2020	640	0.205729	0.195054	0.113677	0.113968	0.156688	0.113677	0.113968	0.113968	0.113968	0.113968	0.51993	0.198454	0.206431	0	0.174895	0.118566	0.163893	0.00325907	0.113677	0.118785	0.113758	0.113677	0.113677	0.20483	0.115269	0
2020	660	0.205729	0.195054	0.113677	0.113968	0.156688	0.113677	0.113968	0.113968	0.113968	0.113968	0.51993	0.198454	0.206431	0	0.174895	0.118566	0.163893	0.00325907	0.113677	0.118785	0.113758	0.113677	0.113677	0.20483	0.115269	0
2020	680	0.205729	0.195054	0.113677	0.113968	0.156688	0.113677	0.113968	0.113968	0.113968	0.113968	0.51993	0.198454	0.206431	0	0.174895	0.118566	0.163893	0.00325907	0.113677	0.118785	0.113758	0.113677	0.113677	0.20483	0.115269	0
2020	700	0.205729	0.195054	0.113677	0.113968	0.156688	0.113677	0.113968	0.113968	0.113968	0.113968	0.51993	0.198454	0.206431	0	0.174895	0.118566	0.163893	0.00325907	0.113677	0.118785	0.113758	0.113677	0.113677	0.20483	0.115269	0
2020	720	0.205729	0.195054	0.113677	0.113968	0.156688	0.113677	0.113968	0.113968	0.113968	0.113968	0.51993	0.198454	0.206431	0	0.174895	0.118566	0.163893	0.124812	0.113677	0.118785	0.113758	0.113677	0.113677	0.20483	0.115269	0
2020	740	0.205729	0.195054	0.113677	0.113968	0.156688	0.113677	0.113968	0.113968	0.113968	0.113968	0.51993	0.198454	0.206431	0	0.174895	0.118566	0.163893	0.124812	0.113677	0.118785	0.113758	0.113677	0.113677	0.20483	0.115269	0
2020	760	0.205729	0.195054	0.113677	0.113968	0.156688	0.113677	0.113968	0.113968	0.113968	0.113968	0.51993	0.198454	0.206431	0	0.174895	0.118566	0.163893	0.124812	0.113677	0.118785	0.113758	0.113677	0.113677	0.20483	0.115269	0
2020	780	0.205729	0.195054	0.113677	0.113968	0.156688	0.113677	0.113968	0.113968	0.113968	0.113968	0.51993	0.198454	0.206431	0	0.174895	0.118566	0.163893	0.124812	0.113677	0.118785	0.113758	0.113677	0.113677	0.20483	0.115269	0
2020	800	0.205729	0.195054	0.113677	0.113968	0.156688	0.113677	0.113968	0.113968	0.113968	0.113968	0.51993	0.198454	0.206431	0	0.174895	0.118566	0.163893	0.124812	0.113677	0.118785	0.113758	0.113677	0.113677	0.20483	0.115269	0
2020	820	0.240266	0.195054	0.113677	0.113968	0.156688	0.113677	0.113968	0.113968	0.113968	0.113968	0.51993	0.198454	0.206431	0	0.174895	0.118566	0.163893	0.124812	0.113677	0.118785	0.113758	0.113677	0.113677	0.20483	0.115269	0
2020	840	0.240266	0.195054	0.113677	0.113968	0.156688	0.113677	0.113968	0.113968	0.113968	0.113968	0.51993	0.198454	0.206431	0	0.174895	0.118566	0.163893	0.124812	0.113677	0.118785	0.113758	0.113677	0.113677	0.20483	0.115269	0
2020	860	0.240266	0.195054	0.113677	0.113968	0.156688	0.113677	0.113968	0.113968	0.113968	0.113968	0.51993	0.198454	0.206431	0	0.174895	0.118566	0.163893	0.124812	0.113677	0.118785	0.113758	0.113677	0.113677	0.20483	0.115269	0
2020	880	0.240266	0.195054	0.113677	0.113968	0.156688	0.113677	0.113968	0.113968	0.113968	0.113968	0.51993	0.198454	0.206431	0	0.174895	0.118566	0.163893	0.124812	0.113677	0.118785	0.113758	0.113677	0.113677	0.20483	0.115269	0
2020	900	0.240266	0.195054	0.113677	0.113968	0.156688	0.113677	0.113968	0.113968	0.113968	0.113968	0.51993	0.198454	0.206431	0	0.174895	0.118566	0.163893	0.124812	0.113677	0.118785	0.113758	0.113677	0.113677	0.20483	0.115269	0
2020	920	0.240266	0.195054	0.113677	0.113968	0.156688	0.113677	0.113968	0.113968	0.113968	0.113968	0.51993	0.198454	0.206431	0	0.174895	0.118566	0.163893	0.124812	0.113677	0.118785	0.113758	0.113677	0.113677	0.20483	0.115269	0
2020	940	0.240266	0.195054	0.113677	0.113968	0.156688	0.113677	0.113968	0.113968	0.113968	0.113968	0.51993	0.198454	0.206431	0	0.174895	0.118566	0.163893	0.124812	0.113677	0.118785	0.113758	0.113677	0.113677	0.20483	0.115269	0
2020	960	0.240266	0.195054	0.113677	0.113968	0.156688	0.113677	0.113968	0.113968	0.113968	0.113968	0.51993	0.198454	0.206431	0	0.174895	0.118566	0.163893	0.124812	0.113677	0.118785	0.113758	0.113677	0.113677	0.20483	0.115269	0
2020	980	0.240266	0.195054	0.113677	0.113968	0.156688	0.113677	0.113968	0.113968	0.113968	0.113968	0.51993	0.198454	0.206431	0	0.174895	0.118566	0.163893	0.124812	0.113677	0.118785	0.113758	0.113677	0.113677	0.20483	0.115269	0
2020	1000	0.240266	0.195054	0.113677	0.113968	0.156688	0.113677	0.113968	0.113968	0.113968	0.113968	0.51993	0.198454	0.206431	0	0.174895	0.118566	0.163893	0.124812	0.113677	0.118785	0.113758	0.113677	0.113677	0.20483	0.115269	0
2020	1020	0.240266	0.195054	0.113677	0.113968	0.156688	0.113677	0.113968	0.113968	0.113968	0.113968	0.51993	0.198454	0.206431	0	0.174895	0.118566	0.163893	0.124812	0.113677	0.118785	0.113758	0.113677	0.113677	0.20483	0.115269	0
2020	1040	0.240266	0.195054	0.113677	0.113968	0.156688	0.113677	0.113968	0.113968	0.113968	0.113968	0.51993	0.198454	0.206431	0	0.174895	0.118566	0.163893	0.124812	0.113677	0.118785	0.113758	0.113677	0.113677	0.20483	0.115269	0
2020	1060	0.240266	0.195054	0.113677	0.113968	0.156688	0.113677	0.113968	0.113968	0.113968	0.113968	0.51993	0.198454	0.206431	0	0.174895	0.118566	0.163893	0.124812	0.113677	0.118785	0.113758	0.113677	0.113677	0.20483	0.115269	0
2020	1080	0.240266	0.195054	0.113677	0.113968	0.156688	0.113677	0.113968	0.113968	0.113968	0.113968	0.51993	0.198454	0.206431	0	0.174895	0.118566	0.163893	0.124812	0.113677	0.118785	0.113758	0.113677	0.113677	0.20483	0.115269	0
2020	1100	0.240266	0.195054	0.113677	0.113968	0.156688	0.113677	0.113968	0.113968	0.113968	0.113968	0.51993	0.198454	0.206431	0	0.174895	0.118566	0.163893	0.124812	0.113677	0.118785	0.113758	0.113677	0.113677	0.20483	0.115269	0
2020	1120	0.240266	0.195054	0.113677	0.113968	0.156688	0.113677	0.113968	0.113968	0.113968	0.113968	0.51993	0.198454	0.206431	0	0.174895	0.118566	0.163893	0.124812	0.113677	0.118785	0.113758	0.113677	0.113677	0.20483	0.115269	0
2020	1140	0.240266	0.195054	0.113677	0.113968	0.156688	0.113677	0.113968	0.113968	0.113968	0.113968	0.51993	0.198454	0.206431	0	0.174895	0.118566	0.163893	0.124812	0.113677	0.118785	0.113758	0.113677	0.113677	0.20483	0.115269	0
2020	1160	0.240266	0.195054	0.113677	0.113968	0.156688	0.113677	0.113968	0.113968	0.113968	0.113968	0.51993	0.198454	0.206431	0	0.174895	0.118566	0.163893	0.124812	0.113677	0.118785	0.113758	0.113677	0.113677	0.20483	0.115269	0
2020	1180	0.240266	0.195054	0.113677	0.113968	0.156688	0.113677	0.113968	0.113968	0.113968	0.113968	0.51993	0.198454	0.206431	0	0.174895	0.118566	0.163893	0.124812	0.113677	0.118785	0.113758	0.113677	0.113677	0.20483	0.115269	0
2020	1200	0.240266	0.195054	0.113677	0.113968	0.156688	0.113677	0.113968	0.113968	0.113968	0.113968	0.51993	0.198454	0.206431	0	0.174895	0.118566	0.163893	0.124812	0.113677	0.118785	0.113758	0.113677	0.113677	0.20483	0.115269	0
2020	1220	0.240266	0.195054	0.113677	0.113968	0.156688	0.113677	0.113968	0.113968	0.113968	0.113968	0.520779	0.198454	0.206431	0	0.174895	0.118566	0.163893	0.124812	0.113677	0.118785	0.113758	0.113677	0.113677	0.20483	0.115269	0
2020	1240	0.240266	0.195054	0.113677	0.113968	0.156688	0.113677	0.113968	0.113968	0.113968	0.113968	0.520779	0.198454	0.206431	0	0.174895	0.118566	0.163893	0.124812	0.113677	0.118785	0.113758	0.113677	0.113677	0.20483	0.115269	0
2020	1260	0.240266	0.195054	0.113677	0.113968	0.156688	0.113677	0.113968	0.113968	0.113968	0.113968	0.520779	0.198454	0.206431	0	0.174895	0.118566	0.163893	0.124812	0.113677	0.118785	0.113758	0.113677	0.113677	0.20483	0.115269	0
2020	1280	0.240266	0.195054	0.113677	0.113968	0.156688	0.113677	0.113968	0.113968	0.113968	0.113968	0.520779	0.198454	0.206431	0	0.174895	0.118566	0.163893	0.124812	0.113677	0.118785	0.113758	0.113677	0.113677	0.20483	0.115269	0
2020	1300	0.240266	0.195054	0.113677	0.113968	0.156688	0.113677	0.113968	0.113968	0.113968	0.113968	0.520779	0.198454	0.206431	0	0.174895	0.118566	0.163893	0.124812	0.113677	0.118785	0.113758	0.113677	0.113677	0.20483	0.115269	0
2020	1320	0.240266	0.195054	0.113677	0.113968	0.156688	0.113677	0.113968	0.113968	0.113968	0.113968	0.520779	0.198454	0.206431	0	0.174895	0.118566	0.163893	0.124812	0.113677	0.118785	0.113758	0.113677	0.113677	0.20483	0.115269	0
2020	1340	0.240266	0.195054	0.113677	0.113968	0.156688	0.113677	0.113968	0.113968	0.113968	0.113968	0.520779	0.198454	0.206431	0	0.174895	0.118566	0.163893	0.124812	0.113677	0.118785	0.113758	0.113677	0.113677	0.20483	0.115269	0
2020	1360	0.240266	0.195054	0.113677	0.113968	0.156688	0.113677	0.113968	0.113968	0.113968	0.113968	0.520779	0.198454	0.206431	0	0.174895	0.118566	0.163893	0.124812	0.113677	0.118785	0.113758	0.113677	0.113677	0.20483	0.115269	0
2020	1380	0.240266	0.195054	0.113677	0.113968	0.156688	0.113677	0.113968	0.113968	0.113968	0.113968	0.520779	0.198454	0.206431	0	0.174895	0.118566	0.163893	0.124812	0.113677	0.118785	0.113758	0.113677	0.113677	0.20483	0.115269	0
2020	1400	0.240266	0.195054	0.113677	0.113968	0.156688	0.113677	0.113968	0.113968	0.113968	0.113968	0.520779	0.198454	0.206431	0	0.174895	0.118566	0.163893	0.124812	0.113677	0.118785	0.113758	0.113677	0.113677	0.20483	0.115269	0
2020	1420	0.240266	0.195054	0.113677	0.113968	0.156688	0.113677	0.113968	0.113968	0.113968	0.113968	0.520779	0.198454	0.206431	0	0.174895	0.118566	0.163893	0.124812	0.113677	0.118785	0.113758	0.113677	0.113677	0.20483	0.115269	0
2020	1440	0.240266	0.195054	0.113677	0.113968	0.156688	0.113677	0.113968	0.113968	0.113968	0.113968	0.520779	0.198454	0.206431	0	0.174895	0.118566	0.163893	0.124812	0.113677	0.118785	0.113758	0.113677	0.113677	0.20483	0.115269	0
2020	1460	0.240266	0.195054	0.113677	0.113968	0.156688	0.113677	0.113968	0.113968	0.113968	0.113968	0.520779	0.198454	0.206431	0	0.174895	0.118566	0.163893	0.124812	0.113677	0.118785	0.113758	0.113677	0.113677	0.20483	0.115269	0
2020	1480	0.240266	0.195054	0.113677	0.113968	0.156688	0.113677	0.113968	0.113968	0.113968	0.113968	0.520779	0.198454	0.206431	0	0.174895	0.118566	0.163893	0.124812	0.113677	0.118785	0.113758	0.113677	0.113677	0.20483	0.115269	0
2020	1500	0.240266	0.195054	0.113677	0.113968	0.156688	0.113677	0.113968	0.113968	0.113968	0.113968	0.520779	0.198454	0.206431	0	0.174895	0.118566	0.163893	0.124812	0.113677	0.118785	0.113758	0.113677	0.113677	0.20483	0.115269	0
2020	1520	0.240266	0.195054	0.113677	0.113968	0.156688	0.113677	0.113968	0.113968	0.113968	0.113968	0.520779	0.198454	0.206431	0	0.174895	0.118566	0.163893	0.124812	0.113677	0.118785	0.113758	0.113677	0.113677	0.20483	0.115269	0
2020	1540	0.240266	0.195054	0.113677	0.113968	0.156688	0.113677	0.113968	0.113968	0.113968	0.113968	0.520779	0.198454	0.206431	0	0.174895	0.118566	0.163893	0.124812	0.113677	0.118785	0.113758	0.113677	0.113677	0.20483	0.115269	0
2020	1560	0.240266	0.195054	0.113677	0.113968	0.156688	0.113677	0.113968	0.113968	0.113968	0.113968	0.520779	0.198454	0.206431	0	0.174895	0.118566	0.163893	0.124812	0.113677	0.118785	0.113758	0.113677	0.113677	0.20483	0.115269	0
2020	1580	0.240266	0.195054	0.113677	0.113968	0.156688	0.113677	0.113968	0.113968	0.113968	0.113968	0.520779	0.198454	0.206431	0	0.174895	0.118566	0.163893	0.124812	0.113677	0.118785	0.113758	0.113677	0.113677	0.20483	0.115269	0
2020	1600	0.240266	0.195054	0.113677	0.113968	0.156688	0.113677	0.113968	0.113968	0.113968	0.113968	0.520779	0.198501	0.206431	0	0.174895	0.118566	0.163893	0.124812	0.113677	0.118785	0.113758	0.113677	0.113677	0.20483	0.115269	0
2020	1620	0.240266	0.195054	0.113677	0.113968	0.156688	0.113677	0.113968	0.113968	0.113968	0.113968	0.520779	0.198501	0.206431	0	0.174895	0.118566	0.163893	0.124812	0.113677	0.118785	0.113758	0.113677	0.113677	0.20483	0.115269	0
2020	1640	0.240266	0.195054	0.113677	0.113968	0.156688	0.113677	0.113968	0.113968	0.113968	0.113968	0.520779	0.198501	0.206431	0	0.174895	0.118566	0.163893	0.124812	0.113677	0.118785	0.113758	0.113677	0.113677	0.20483	0.115269	0
2020	1660	0.240266	0.195054	0.113677	0.113968	0.156688	0.113677	0.113968	0.113968	0.113968	0.113968	0.520779	0.198501	0.206431	0	0.174895	0.118566	0.163893	0.124812	0.113677	0.118785	0.113758	0.113677	0.113677	0.20483	0.115269	0
2020	1680	0.240266	0.195054	0.113677	0.113968	0.156688	0.113677	0.113968	0.113968	0.113968	0.113968	0.520779	0.198501	0.206431	0	0.174895	0.118566	0.163893	0.124812	0.113677	0.118785	0.113758	0.113677	0.113677	0.20483	0.115269	0
2020	1700	0.240266	0.195054	0.113677	0.113968	0.156688	0.113677	0.113968	0.113968	0.113968	0.113968	0.520779	0.198501	0.206431	0	0.174895	0.118566	0.163893	0.124812	0.113677	0.118785	0.113758	0.113677	0.113677	0.20483	0.115269	0
2020	1720	0.240266	0.195054	0.113677	0.113968	0.156688	0.113677	0.113968	0.113968	0.113968	0.113968	0.520779	0.198501	0.206431	0	0.174895	0.118566	0.163893	0.124812	0.113677	0.118785	0.113758	0.113677	0.113677	0.20483	0.115269	0
2020	1740	0.240266	0.195054	0.113677	0.113968	0.156688	0.113677	0.113968	0.113968	0.113968	0.113968	0.520779	0.198501	0.206431	0	0.174895	0.118566	0.163893	0.124812	0.113677	0.118785	0.113758	0.113677	0.113677	0.20483	0.115269	0
2020	1760	0.240266	0.195054	0.113677	0.113968	0.156688	0.113677	0.113968	0.113968	0.113968	0.113968	0.520779	0.198501	0.206431	0	0.174895	0.118566	0.163893	0.124812	0.113677	0.118785	0.113758	0.113677	0.113677	0.20483	0.115269	0
2020	1780	0.240266	0.195054	0.113677	0.113968	0.156688	0.113677	0.113968	0.113968	0.113968	0.113968	0.520779	0.198501	0.206431	0	0.174895	0.118566	0.163893	0.124812	0.113677	0.118785	0.113758	0.113677	0.113677	0.20483	0.115269	0
2020	1800	0.240266	0.195054	0.113677	0.113968	0.156688	0.113677	0.113968	0.113968	0.113968	0.113968	0.520779	0.198501	0.206431	0	0.174895	0.118566	0.163893	0.124812	0.113677	0.118785	0.113758	0.113677	0.113677	0.20483	0.115269	0
2020	1820	0.240266	0.195054	0.113677	0.113968	0.156688	0.113677	0.113968	0.113968	0.113968	0.113968	0.520779	0.198501	0.206431	0	0.174895	0.118566	0.163893	0.124812	0.113677	0.118785	0.113758	0.113677	0.113677	0.20483	0.115269	0
2020	1840	0.240266	0.195054	0.113677	0.113968	0.156688	0.113677	0.113968	0.113968	0.113968	0.113968	0.520779	0.198501	0.206431	0	0.174895	0.118566	0.163893	0.124812	0.113677	0.118785	0.113758	0.113677	0.113677	0.20483	0.115269	0
2020	1860	0.240266	0.195054	0.113677	0.113968	0.156688	0.113677	0.113968	0.113968	0.113968	0.113968	0.520779	0.198501	0.206431	0	0.174895	0.118566	0.163893	0.124812	0.113677	0.118785	0.113758	0.113677	0.113677	0.20483	0.115269	0
2020	1880	0.240266	0.195054	0.113677	0.113968	0.156688	0.113677	0.113968	0.113968	0.113968	0.113968	0.520779	0.198501	0.206431	0	0.174895	0.118566	0.163893	0.124812	0.113677	0.118785	0.113758	0.113677	0.113677	0.20483	0.115269	0
2020	1900	0.240266	0.195054	0.113677	0.113968	0.156688	0.113677	0.113968	0.113968	0.113968	0.113968	0.520779	0.198501	0.206431	0	0.174895	0.118566	0.163893	0.124812	0.113677	0.118785	0.113758	0.113677	0.113677	0.20483	0.115269	0
2020	1920	0.240266	0.195054	0.113677	0.113968	0.156688	0.113677	0.113968	0.113968	0.113968	0.113968	0.520779	0.198501	0.206431	0	0.174895	0.118566	0.163893	0.124812	0.113677	0.118785	0.113758	0.113677	0.113677	0.20483	0.115269	0
2020	1940	0.240266	0.195054	0.113677	0.113968	0.156688	0.113677	0.113968	0.113968	0.113968	0.113968	0.520779	0.198501	0.206431	0	0.174895	0.118566	0.163893	0.124812	0.113677	0.118785	0.113758	0.113677	0.113677	0.20483	0.115269	0
2020	1960	0.240266	0.195054	0.113677	0.113968	0.156688	0.113677	0.113968	0.113968	0.113968	0.113968	0.520779	0.198501	0.206431	0	0.174895	0.118566	0.163893	0.124812	0.113677	0.118785	0.113758	0.113677	0.113677	0.20483	0.115269	0
2020	1980	0.240266	0.195054	0.113677	0.113968	0.156688	0.113677	0.113968	0.113968	0.113968	0.113968	0.520779	0.198501	0.206431	0	0.174895	0.118566	0.163893	0.124812	0.113677	0.118785	0.113758	0.113677	0.113677	0.20483	0.115269	0
2020	2000	0.240266	0.195054	0.113677	0.113968	0.156688	0.113677	0.113968	0.113968	0.113968	0.113968	0.520779	0.198501	0.206431	0	0.174895	0.118566	0.163893	0.124812	0.113677	0.118785	0.113758	0.113677	0.113677	0.20483	0.115269	0
2020	2020	0.240266	0.195054	0.113677	0.113968	0.156688	0.113677	0.113968	0.113968	0.113968	0.113968	0.520779	0.198501	0.206431	0	0.174895	0.118566	0.163893	0.124812	0.113677	0.118785	0.113758	0.113677	0.113677	0.20483	0.115269	0
2020	2040	0.240266	0.195054	0.113677	0.113968	0.156688	0.113677	0.113968	0.113968	0.113968	0.113968	0.520779	0.198501	0.206431	0	0.174895	0.118566	0.163893	0.124812	0.113677	0.118785	0.113758	0.113677	0.113677	0.20483	0.115269	0
2020	2060	0.240266	0.195054	0.113677	0.113968	0.156688	0.113677	0.113968	0.113968	0.113968	0.113968	0.520779	0.198501	0.206431	0	0.174895	0.118566	0.163893	0.124812	0.113677	0.118785	0.113758	0.113677	0.113677	0.20483	0.115269	0
2020	2080	0.240266	0.195054	0.113677	0.113968	0.156688	0.113677	0.113968	0.113968	0.113968	0.113968	0.520779	0.198501	0.206431	0	0.174895	0.118566	0.163893	0.124812	0.113677	0.118785	0.113758	0.113677	0.113677	0.20483	0.115269	0
2020	2100	0.240266	0.195054	0.113677	0.113968	0.156688	0.113677	0.113968	0.113968	0.113968	0.113968	0.520779	0.198501	0.206431	0	0.174895	0.118566	0.163893	0.124812	0.113677	0.118785	0.113758	0.113677	0.113677	0.20483	0.115269	0
2020	2120	0.240266	0.195054	0.113677	0.113968	0.156688	0.113677	0.113968	0.113968	0.113968	0.113968	0.520779	0.198501	0.206431	0	0.174895	0.118566	0.163893	0.124812	0.113677	0.118785	0.113758	0.113677	0.113677	0.20483	0.115269	0
2020	2140	0.240266	0.195054	0.113677	0.113968	0.156688	0.113677	0.113968	0.113968	0.113968	0.113968	0.520779	0.198501	0.206431	0	0.174895	0.118566	0.163893	0.124812	0.113677	0.118785	0.113758	0.113677	0.113677	0.20483	0.115269	0
2020	2160	0.240266	0.195054	0.113677	0.113968	0.156688	0.113677	0.113968	0.113968	0.113968	0.113968	0.520779	0.198501	0.206431	0	0.174895	0.118566	0.163893	0.124812	0.113677	0.118785	0.113758	0.113677	0.113677	0.20483	0.115269	0
2020	2180	0.240266	0.195054	0.113677	0.113968	0.156688	0.113677	0.113968	0.113968	0.113968	0.113968	0.520779	0.198501	0.206431	0	0.174895	0.118566	0.163893	0.124812	0.113677	0.118785	0.113758	0.113677	0.113677	0.20483	0.115269	0
2020	2200	0.240266	0.195054	0.113677	0.113968	0.156688	0.113677	0.113968	0.113968	0.113968	0.113968	0.520779	0.198501	0.206431	0	0.174895	0.118566	0.163893	0.124812	0.113677	0.118785	0.113758	0.113677	0.113677	0.20483	0.115269	0
2020	2220	0.240266	0.195054	0.113677	0.113968	0.156688	0.113677	0.113968	0.113968	0.113968	0.113968	0.520779	0.198501	0.206431	0	0.174895	0.118566	0.163893	0.124812	0.113677	0.118785	0.113758	0.113677	0.113677	0.20483	0.115269	0
2020	2240	0.240266	0.195054	0.113677	0.113968	0.156688	0.113677	0.113968	0.113968	0.113968	0.113968	0.520779	0.198501	0.206431	0	0.174895	0.118566	0.163893	0.124812	0.113677	0.118785	0.113758	0.113677	0.113677	0.20483	0.115269	0
2020	2260	0.240266	0.195054	0.113677	0.113968	0.156688	0.113677	0.113968	0.113968	0.113968	0.113968	0.520779	0.198501	0.206431	0	0.174895	0.118566	0.163893	0.124812	0.113677	0.118785	0.113758	0.113677	0.113677	0.20483	0.115269	0
2020	2280	0.240266	0.195054	0.113677	0.113968	0.156688	0.113677	0.113968	0.113968	0.113968	0.113968	0.520779	0.198501	0.206431	0	0.174895	0.118566	0.163893	0.124812	0.113677	0.118785	0.113758	0.113677	0.113677	0.20483	0.115269	0
2020	2300	0.240266	0.195054	0.113677	0.113968	0.156688	0.113677	0.113968	0.113968	0.113968	0.113968	0.520779	0.198501	0.206431	0	0.174895	0.118566	0.163893	0.124812	0.113677	0.118785	0.113758	0.113677	0.113677	0.20483	0.115269	0
2020	2320	0.240266	0.195054	0.113677	0.113968	0.156688	0.113677	0.113968	0.113968	0.113968	0.113968	0.520779	0.198501	0.206431	0	0.174895	0.118566	0.163893	0.124812	0.113677	0.118785	0.113758	0.113677	0.113677	0.20483	0.115269	0
2020	2340	0.240266	0.195054	0.113677	0.113968	0.156688	0.113677	0.113968	0.113968	0.113968	0.113968	0.520779	0.198501	0.206431	0	0.174895	0.118566	0.163893	0.124812	0.113677	0.118785	0.113758	0.113677	0.113677	0.20483	0.115269	0
2020	2360	0.240266	0.195054	0.113677	0.113968	0.156688	0.113677	0.113968	0.113968	0.113968	0.113968	0.520779	0.198501	0.206431	0	0.174895	0.118566	0.163893	0.124812	0.113677	0.118785	0.113758	0.113677	0.113677	0.20483	0.115269	0
2020	2380	0.240266	0.195054	0.113677	0.113968	0.156688	0.113677	0.113968	0.113968	0.113968	0.113968	0.520779	0.198501	0.206431	0	0.174895	0.118566	0.163893	0.124812	0.113677	0.118785	0.113758	0.113677	0.113677	0.20483	0.115269	0
2020	2400	0.240266	0.195054	0.113677	0.113968	0.156688	0.113677	0.113968	0.113968	0.113968	0.113968	0.520779	0.198501	0.206431	0	0.174895	0.118566	0.163893	0.124812	0.113677	0.118785	0.113758	0.113677	0.113677	0.20483	0.115269	0
2020	2420	0.240266	0.195054	0.113677	0.113968	0.156688	0.113677	0.113968	0.113968	0.113968	0.113968	0.520779	0.198501	0.206431	0	0.174895	0.118566	0.163893	0.124812	0.113677	0.118785	0.113758	0.113677	0.113677	0.20483	0.115269	0
2020	2440	0.240266	0.195054	0.113677	0.113968	0.156688	0.113677	0.113968	0.113968	0.113968	0.113968	0.520779	0.198501	0.206431	0	0.174895	0.118566	0.163893	0.124812	0.113677	0.118785	0.113758	0.113677	0.113677	0.20483	0.115269	0
2020	2460	0.240266	0.195054	0.113677	0.113968	0.156688	0.113677	0.113968	0.113968	0.113968	0.113968	0.520779	0.198501	0.206431	0	0.174895	0.118566	0.163893	0.124812	0.113677	0.118785	0.113758	0.113677	0.113677	0.20483	0.115269	0
2020	2480	0.240266	0.195054	0.113677	0.113968	0.156688	0.113677	0.113968	0.113968	0.113968	0.113968	0.520779	0.198501	0.206431	0	0.174895	0.118566	0.163893	0.124812	0.113677	0.118785	0.113758	0.113677	0.113677	0.20483	0.115269	0
2020	2500	0.240266	0.195054	0.113677	0.113968	0.156688	0.113677	0.113968	0.113968	0.113968	0.113968	0.520779	0.198501	0.206431	0	0.174895	0.118566	0.163893	0.124812	0.113677	0.118785	0.113758	0.113677	0.113677	0.20483	0.115269	0
2020	2520	0.240266	0.195054	0.113677	0.113968	0.156688	0.113677	0.113968	0.113968	0.113968	0.113968	0.520779	0.198501	0.206431	0	0.174895	0.118566	0.163893	0.124812	0.113677	0.118785	0.113758	0.113677	0.113677	0.20483	0.115269	0
2020	2540	0.240266	0.195054	0.113677	0.113968	0.156688	0.113677	0.113968	0.113968	0.113968	0.113968	0.520779	0.198501	0.206431	0	0.174895	0.118566	0.163893	0.124812	0.113677	0.118785	0.113758	0.113677	0.113677	0.20483	0.115269	0
2020	2560	0.240266	0.195054	0.113677	0.113968	0.156688	0.113677	0.113968	0.113968	0.113968	0.113968	0.520779	0.198501	0.206431	0	0.174895	0.118566	0.163893	0.124812	0.113677	0.118785	0.113758	0.113677	0.113677	0.20483	0.115269	0
2020	2580	0.240266	0.195054	0.113677	0.113968	0.156688	0.113677	0.113968	0.113968	0.113968	0.113968	0.520779	0.198501	0.206431	0	0.174895	0.118566	0.163893	0.124812	0.113677	0.118785	0.113758	0.113677	0.113677	0.20483	0.115269	0
2020	2600	0.240266	0.195054	0.113677	0.113968	0.156688	0.113677	0.113968	0.113968	0.113968	0.113968	0.520779	0.198501	0.206431	0	0.174895	0.118566	0.163893	0.124812	0.113677	0.118785	0.113758	0.113677	0.113677	0.20483	0.115269	0
2020	2620	0.240266	0.195054	0.113677	0.113968	0.156688	0.113677	0.113968	0.113968	0.113968	0.113968	0.520779	0.198501	0.206431	0	0.174895	0.118566	0.163893	0.124812	0.113677	0.118785	0.113758	0.113677	0.113677	0.20483	0.115269	0
2020	2640	0.240266	0.195054	0.113677	0.113968	0.156688	0.113677	0.113968	0.113968	0.113968	0.113968	0.520779	0.198501	0.206431	0	0.174895	0.118566	0.163893	0.124812	0.113677	0.118785	0.113758	0.113677	0.113677	0.20483	0.115269	0
2020	2660	0.240266	0.195054	0.113677	0.113968	0.156688	0.113677	0.113968	0.113968	0.113968	0.113968	0.520779	0.198501	0.206431	0	0.174895	0.118566	0.163893	0.124812	0.113677	0.118785	0.113758	0.113677	0.113677	0.20483	0.115269	0
2020	2680	0.240266	0.195054	0.113677	0.113968	0.156688	0.113677	0.113968	0.113968	0.113968	0.113968	0.520779	0.198501	0.206431	0	0.174895	0.118566	0.163893	0.124812	0.113677	0.118785	0.113758	0.113677	0.113677	0.20483	0.115269	0
2020	2700	0.240266	0.195054	0.113677	0.113968	0.156688	0.113677	0.113968	0.113968	0.113968	0.113968	0.520779	0.198501	0.206431	0	0.174895	0.118566	0.163893	0.124812	0.113677	0.118785	0.113758	0.113677	0.113677	0.20483	0.115269	0
2020	2720	0.240266	0.195054	0.113677	0.113968	0.156688	0.113677	0.113968	0.113968	0.113968	0.113968	0.520779	0.198501	0.206431	0	0.174895	0.118566	0.163893	0.124812	0.113677	0.118785	0.113758	0.113677	0.113677	0.20483	0.115269	0
2020	2740	0.240266	0.195054	0.113677	0.113968	0.156688	0.113677	0.113968	0.113968	0.113968	0.113968	0.520779	0.198501	0.206431	0	0.174895	0.118566	0.163893	0.124812	0.113677	0.118785	0.113758	0.113677	0.113677	0.20483	0.115269	0
2020	2760	0.240266	0.195054	0.113677	0.113968	0.156688	0.113677	0.113968	0.113968	0.113968	0.113968	0.520779	0.198501	0.206431	0	0.174895	0.118566	0.163893	0.124812	0.113677	0.118785	0.113758	0.113677	0.113677	0.20483	0.115269	0
2020	2780	0.240266	0.195054	0.113677	0.113968	0.156688	0.113677	0.113968	0.113968	0.113968	0.113968	0.520779	0.198501	0.206431	0	0.174895	0.118566	0.163893	0.124812	0.113677	0.118785	0.113758	0.113677	0.113677	0.20483	0.115269	0
2020	2800	0.240266	0.195054	0.113677	0.113968	0.156688	0.113677	0.113968	0.113968	0.113968	0.113968	0.520779	0.198501	0.206431	0	0.174895	0.118566	0.163893	0.124812	0.113677	0.118785	0.113758	0.113677	0.113677	0.20483	0.115269	0
2020	2820	0.240266	0.195054	0.113677	0.113968	0.156688	0.113677	0.113968	0.113968	0.113968	0.113968	0.520779	0.198501	0.206431	0	0.174895	0.118566	0.163893	0.124812	0.113677	0.118785	0.113758	0.113677	0.113677	0.20483	0.115269	0
2020	2840	0.240266	0.195054	0.113677	0.113968	0.156688	0.113677	0.113968	0.113968	0.113968	0.113968	0.520779	0.198501	0.206431	0	0.174895	0.118566	0.163893	0.124812	0.113677	0.118785	0.113758	0.113677	0.113677	0.20483	0.115269	0
2020	2860	0.240266	0.195054	0.113677	0.113968	0.156688	0.113677	0.113968	0.113968	0.113968	0.113968	0.520779	0.198501	0.206431	0	0.174895	0.118566	0.163893	0.124812	0.113677	0.118785	0.113758	0.113677	0.113677	0.20483	0.115269	0
2020	2880	0.240266	0.195054	0.113677	0.113968	0.156688	0.113677	0.113968	0.113968	0.113968	0.113968	0.520779	0.198501	0.206431	0	0.174895	0.118566	0.163893	0.124812	0.113677	0.118785	0.113758	0.113677	0.113677	0.20483	0.115269	0
2020	2900	0.240266	0.195054	0.113677	0.113968	0.156688	0.113677	0.113968	0.113968	0.113968	0.113968	0.520779	0.198501	0.206431	0	0.174895	0.118566	0.163893	0.124812	0.113677	0.118785	0.113758	0.113677	0.113677	0.20483	0.115269	0
2020	2920	0.240266	0.195054	0.113677	0.113968	0.156688	0.113677	0.113968	0.113968	0.113968	0.113968	0.520779	0.198501	0.206431	0	0.174895	0.118566	0.163893	0.124812	0.113677	0.118785	0.113758	0.113677	0.113677	0.20483	0.115269	0
2020	2940	0.240266	0.195054	0.113677	0.113968	0.156688	0.113677	0.113968	0.113968	0.113968	0.113968	0.520779	0.198501	0.206431	0	0.174895	0.118566	0.163893	0.124812	0.113677	0.118785	0.113758	0.113677	0.113677	0.20483	0.115269	0
2020	2960	0.240266	0.195054	0.113677	0.113968	0.156688	0.113677	0.113968	0.113968	0.113968	0.113968	0.520779	0.198501	0.206431	0	0.174895	0.118566	0.163893	0.124812	0.113677	0.118785	0.113758	0.113677	0.113677	0.20483	0.115269	0
2020	2980	0.240266	0.195054	0.113677	0.113968	0.156688	0.113677	0.113968	0.113968	0.113968	0.113968	0.520779	0.198501	0.206431	0	0.174895	0.118566	0.163893	0.124812	0.113677	0.118785	0.113758	0.113677	0.113677	0.20483	0.115269	0
2020	3000	0.240266	0.195054	0.113677	0.113968	0.156688	0.113677	0.113968	0.113968	0.113968	0.113968	0.520779	0.198501	0.206431	0	0.174895	0.118566	0.163893	0.124812	0.113677	0.118785	0.113758	0.113677	0.113677	0.20483	0.115269	0
2020	3020	0.240266	0.195054	0.113677	0.113968	0.156688	0.113677	0.113968	0.113968	0.113968	0.113968	0.520779	0.198501	0.206431	0	0.174895	0.118566	0.163893	0.124812	0.113677	0.118785	0.113758	0.113677	0.113677	0.20483	0.115269	0
2020	3040	0.240266	0.195054	0.113677	0.113968	0.156688	0.113677	0.113968	0.113968	0.113968	0.113968	0.520779	0.198501	0.206431	0	0.174895	0.118566	0.163893	0.124812	0.113677	0.118785	0.113758	0.113677	0.113677	0.20483	0.115269	0
2020	3060	0.240266	0.195054	0.113677	0.113968	0.156688	0.113677	0.113968	0.113968	0.113968	0.113968	0.520779	0.198501	0.206431	0	0.174895	0.118566	0.163893	0.124812	0.113677	0.118785	0.113758	0.113677	0.113677	0.20483	0.115269	0
2020	3080	0.240266	0.195054	0.113677	0.113968	0.156688	0.113677	0.113968	0.113968	0.113968	0.113968	0.520779	0.198501	0.206431	0	0.174895	0.118566	0.163893	0.124812	0.113677	0.118785	0.113758	0.113677	0.113677	0.20483	0.115269	0
2020	3100	0.240266	0.195054	0.113677	0.113968	0.156688	0.113677	0.113968	0.113968	0.113968	0.113968	0.520779	0.198501	0.206431	0	0.174895	0.118566	0.163893	0.124812	0.113677	0.118785	0.113758	0.113677	0.113677	0.20483	0.115269	0
2020	3120	0.240266	0.195054	0.113677	0.113968	0.156688	0.113677	0.113968	0.113968	0.113968	0.113968	0.520779	0.198501	0.206431	0	0.174895	0.118566	0.163893	0.124812	0.113677	0.118785	0.113758	0.113677	0.113677	0.20483	0.115269	0
2020	3140	0.240266	0.195054	0.113677	0.113968	0.156688	0.113677	0.113968	0.113968	0.113968	0.113968	0.520779	0.198501	0.206431	0	0.174895	0.118566	0.163893	0.124812	0.113677	0.118785	0.113758	0.113677	0.113677	0.20483	0.115269	0
2020	3160	0.240266	0.195054	0.113677	0.113968	0.156688	0.113677	0.113968	0.113968	0.113968	0.113968	0.520779	0.198501	0.206431	0	0.174895	0.118566	0.163893	0.124812	0.113677	0.118785	0.113758	0.113677	0.113677	0.20483	0.115269	0
2020	3180	0.240266	0.195054	0.113677	0.113968	0.156688	0.113677	0.113968	0.113968	0.113968	0.113968	0.520779	0.198501	0.206431	0	0.174895	0.118566	0.163893	0.124812	0.113677	0.118785	0.113758	0.113677	0.113677	0.20483	0.115269	0
2020	3200	0.240266	0.195054	0.113677	0.113968	0.156688	0.113677	0.113968	0.113968	0.113968	0.113968	0.520779	0.198501	0.206431	0	0.174895	0.118566	0.163893	0.124812	0.113677	0.118785	0.113758	0.113677	0.113677	0.20483	0.115269	0
2020	3220	0.240266	0.195054	0.113677	0.113968	0.156688	0.113677	0.113968	0.113968	0.113968	0.113968	0.520779	0.198501	0.206431	0	0.174895	0.118566	0.163893	0.124812	0.113677	0.118785	0.113758	0.113677	0.113677	0.20483	0.115269	0
2020	3240	0.240266	0.195054	0.113677	0.113968	0.156688	0.113677	0.113968	0.113968	0.113968	0.113968	0.520779	0.198501	0.206431	0	0.174895	0.118566	0.163893	0.124812	0.113677	0.118785	0.113758	0.113677	0.113677	0.20483	0.115269	0
2020	3260	0.240266	0.195054	0.113677	0.113968	0.156688	0.113677	0.113968	0.113968	0.113968	0.113968	0.520779	0.198501	0.206431	0	0.174895	0.118566	0.163893	0.124812	0.113677	0.118785	0.113758	0.113677	0.113677	0.20483	0.115269	0
2020	3280	0.240266	0.195054	0.113677	0.113968	0.156688	0.113677	0.113968	0.113968	0.113968	0.113968	0.520779	0.198501	0.206431	0	0.174895	0.118566	0.163893	0.124812	0.113677	0.118785	0.113758	0.113677	0.113677	0.20483	0.115269	0
2020	3300	0.240266	0.195054	0.113677	0.113968	0.156688	0.113677	0.113968	0.113968	0.113968	0.113968	0.520779	0.198501	0.206431	0	0.174895	0.118566	0.163893	0.124812	0.113677	0.118785	0.113758	0.113677	0.113677	0.20483	0.115269	0
2020	3320	0.240266	0.195054	0.113677	0.113968	0.156688	0.113677	0.113968	0.113968	0.113968	0.113968	0.520779	0.198501	0.206431	0	0.174895	0.118566	0.163893	0.124812	0.113677	0.118785	0.113758	0.113677	0.113677	0.20483	0.115269	0
2020	3340	0.240266	0.195054	0.113677	0.113968	0.156688	0.113677	0.113968	0.113968	0.113968	0.113968	0.520779	0.198501	0.206431	0	0.174895	0.118566	0.163893	0.124812	0.113677	0.118785	0.113758	0.113677	0.113677	0.20483	0.115269	0
2020	3360	0.240266	0.195054	0.113677	0.113968	0.156688	0.113677	0.113968	0.113968	0.113968	0.113968	0.520779	0.198501	0.206431	0	0.174895	0.118566	0.163893	0.124812	0.113677	0.118785	0.113758	0.113677	0.113677	0.20483	0.115269	0
2020	3380	0.240266	0.195054	0.113677	0.113968	0.156688	0.113677	0.113968	0.113968	0.113968	0.113968	0.520779	0.198501	0.206431	0	0.174895	0.118566	0.163893	0.124812	0.113677	0.118785	0.113758	0.113677	0.113677	0.20483	0.115269	0
2020	3400	0.240266	0.195054	0.113677	0.113968	0.156688	0.113677	0.113968	0.113968	0.113968	0.113968	0.520779	0.198501	0.206431	0	0.174895	0.118566	0.163893	0.124812	0.113677	0.118785	0.113758	0.113677	0.113677	0.20483	0.115269	0
2020	3420	0.240266	0.195054	0.113677	0.113968	0.156688	0.113677	0.113968	0.113968	0.113968	0.113968	0.520779	0.198501	0.206431	0	0.174895	0.118566	0.163893	0.124812	0.113677	0.118785	0.113758	0.113677	0.113677	0.20483	0.115269	0
2020	3440	0.240266	0.195054	0.113677	0.113968	0.156688	0.113677	0.113968	0.113968	0.113968	0.113968	0.520779	0.198501	0.206431	0	0.174895	0.118566	0.163893	0.124812	0.113677	0.118785	0.113758	0.113677	0.113677	0.20483	0.115269	0
2020	3460	0.240266	0.195054	0.113677	0.113968	0.156688	0.113677	0.113968	0.113968	0.113968	0.113968	0.520779	0.198501	0.206431	0	0.174895	0.118566	0.163893	0.124812	0.113677	0.118785	0.113758	0.113677	0.113677	0.20483	0.115269	0
2020	3480	0.240266	0.195054	0.113677	0.113968	0.156688	0.113677	0.113968	0.113968	0.113968	0.113968	0.520779	0.198501	0.206431	0	0.174895	0.118566	0.163893	0.124812	0.113677	0.118785	0.113758	0.113677	0.113677	0.20483	0.115269	0
2020	3500	0.240266	0.195054	0.113677	0.113968	0.156688	0.113677	0.113968	0.113968	0.113968	0.113968	0.520779	0.198501	0.206431	0	0.174895	0.118566	0.163893	0.124812	0.113677	0.118785	0.113758	0.113677	0.113677	0.20483	0.115269	0
2020	3520	0.240266	0.195054	0.113677	0.113968	0.156688	0.113677	0.113968	0.113968	0.113968	0.113968	0.520779	0.198501	0.206431	0	0.174895	0.118566	0.163893	0.124812	0.113677	0.118785	0.113758	0.113677	0.113677	0.20483	0.115269	0
2020	3540	0.240266	0.195054	0.113677	0.113968	0.156688	0.113677	0.113968	0.113968	0.113968	0.113968	0.520779	0.198501	0.206431	0	0.174895	0.118566	0.163893	0.124812	0.113677	0.118785	0.113758	0.113677	0.113677	0.20483	0.115269	0.151167
2020	3560	0.240266	0.195054	0.113677	0.113968	0.156688	0.113677	0.113968	0.113968	0.113968	0.113968	0.520779	0.198501	0.206431	0	0.174895	0.118566	0.163893	0.124812	0.113677	0.118785	0.113758	0.113677	0.113677	0.20483	0.115269	0.151167
2020	3580	0.240266	0.195054	0.113677	0.113968	0.156688	0.113677	0.113968	0.113968	0.113968	0.113968	0.520779	0.198501	0.206431	0	0.174895	0.118566	0.163893	0.124812	0.113677	0.118785	0.113758	0.113677	0.113677	0.20483	0.115269	0.151167
2020	3600	0.240266	0.195054	0.113677	0.113968	0.156688	0.113677	0.113968	0.113968	0.113968	0.113968	0.520779	0.198501	0.206431	0	0.174895	0.118566	0.163893	0.124812	0.113677	0.118785	0.113758	0.113677	0.113677	0.20483	0.115269	0.151167
2020	3620	0.240266	0.195054	0.113677	0.113968	0.156688	0.113677	0.113968	0.113968	0.113968	0.113968	0.520779	0.198501	0.206431	0	0.174895	0.118566	0.163893	0.124812	0.113677	0.118785	0.113758	0.113677	0.113677	0.20483	0.115269	0.151167
2020	3640	0.240266	0.195054	0.113677	0.113968	0.156688	0.113677	0.113968	0.113968	0.113968	0.113968	0.520779	0.198501	0.206431	0	0.174895	0.118566	0.163893	0.124812	0.113677	0.118785	0.113758	0.113677	0.113677	0.20483	0.115269	0.151167
2020	3660	0.240266	0.195054	0.113677	0.113968	0.156688	0.113677	0.113968	0.113968	0.113968	0.113968	0.520779	0.198501	0.206431	0	0.174895	0.118566	0.163893	0.124812	0.113677	0.118785	0.113758	0.113677	0.113677	0.20483	0.115269	0.151167
2020	3680	0.240266	0.195054	0.113677	0.113968	0.156688	0.113677	0.113968	0.113968	0.113968	0.113968	0.520779	0.198501	0.206431	0	0.174895	0.118566	0.163893	0.124812	0.113677	0.118785	0.113758	0.113677	0.113677	0.20483	0.115269	0.151167
2020	3700	0.240266	0.195054	0.113677	0.113968	0.156688	0.113677	0.113968	0.113968	0.113968	0.113968	0.520779	0.198501	0.206431	0	0.174895	0.118566	0.163893	0.124812	0.113677	0.118785	0.113758	0.113677	0.113677	0.20483	0.115269	0.151167
2020	3720	0.240266	0.195054	0.113677	0.113968	0.156688	0.113677	0.113968	0.113968	0.113968	0.113968	0.520779	0.198501	0.206431	0	0.174895	0.118566	0.163893	0.124812	0.113677	0.118785	0.113758	0.113677	0.113677	0.20483	0.115269	0.151167
2020	3740	0.240266	0.195054	0.113677	0.113968	0.156688	0.113677	0.113968	0.113968	0.113968	0.113968	0.520779	0.198501	0.206431	0	0.174895	0.118566	0.163893	0.124812	0.113677	0.118785	0.113758	0.113677	0.113677	0.20483	0.115269	0.151167
2020	3760	0.240266	0.195054	0.113677	0.113968	0.156688	0.113677	0.113968	0.113968	0.113968	0.113968	0.520779	0.198501	0.206431	0	0.174895	0.118566	0.163893	0.124812	0.113677	0.118785	0.113758	0.113677	0.113677	0.20483	0.115269	0.151167
2020	3780	0.240266	0.195054	0.113677	0.113968	0.156688	0.113677	0.113968	0.113968	0.113968	0.113968	0.520779	0.198501	0.206431	0	0.174895	0.118566	0.163893	0.124812	0.113677	0.118785	0.113758	0.113677	0.113677	0.20483	0.115269	0.151167
2020	3800	0.240266	0.195054	0.113677	0.113968	0.156688	0.113677	0.113968	0.113968	0.113968	0.113968	0.520779	0.198501	0.206431	0	0.174895	0.118566	0.163893	0.124812	0.113677	0.118785	0.113758	0.113677	0.113677	0.20483	0.115269	0.151167
2020	3820	0.240266	0.195054	0.113677	0.113968	0.156688	0.113677	0.113968	0.113968	0.113968	0.113968	0.520779	0.198501	0.206431	0	0.174895	0.118566	0.163893	0.124812	0.113677	0.118785	0.113758	0.113677	0.113677	0.20483	0.115269	0.151167
2020	3840	0.240266	0.195054	0.113677	0.113968	0.156688	0.113677	0.113968	0.113968	0.113968	0.113968	0.520779	0.198501	0.206431	0	0.174895	0.118566	0.163893	0.124812	0.113677	0.118785	0.113758	0.113677	0.113677	0.20483	0.115269	0.151167
2020	3860	0.240266	0.195054	0.113677	0.113968	0.156688	0.113677	0.113968	0.113968	0.113968	0.113968	0.520779	0.198501	0.206431	0	0.174895	0.118566	0.163893	0.124812	0.113677	0.118785	0.113758	0.113677	0.113677	0.20483	0.115269	0.151167
2020	3880	0.240266	0.195054	0.113677	0.113968	0.156688	0.113677	0.113968	0.113968	0.113968	0.113968	0.520779	0.198501	0.206431	0	0.174895	0.118566	0.163893	0.124812	0.113677	0.118785	0.113758	0.113677	0.113677	0.20483	0.115269	0.151167
2020	3900	0.240266	0.195054	0.113677	0.113968	0.156688	0.113677	0.113968	0.113968	0.113968	0.113968	0.520779	0.198501	0.206431	0	0.174895	0.118566	0.163893	0.124812	0.113677	0.118785	0.113758	0.113677	0.113677	0.20483	0.115269	0.151167
2020	3920	0.240266	0.195054	0.113677	0.113968	0.156688	0.113677	0.113968	0.113968	0.113968	0.113968	0.520779	0.198501	0.206431	0	0.174895	0.118566	0.163893	0.124812	0.113677	0.118785	0.113758	0.113677	0.113677	0.20483	0.115269	0.151167
2020	3940	0.240266	0.195054	0.113677	0.113968	0.156688	0.113677	0.113968	0.113968	0.113968	0.113968	0.520779	0.198501	0.206431	0	0.174895	0.118566	0.163893	0.124812	0.113677	0.118785	0.113758	0.113677	0.113677	0.20483	0.115269	0.151167
2020	3960	0.240266	0.195054	0.113677	0.113968	0.156688	0.113677	0.113968	0.113968	0.113968	0.113968	0.520779	0.198501	0.206431	0	0.174895	0.118566	0.163893	0.124812	0.113677	0.118785	0.113758	0.113677	0.113677	0.20483	0.115269	0.151167
2020	3980	0.240266	0.195054	0.113677	0.113968	0.156688	0.113677	0.113968	0.113968	0.113968	0.113968	0.520779	0.198501	0.206431	0	0.174895	0.118566	0.163893	0.124812	0.113677	0.118785	0.113758	0.113677	0.113677	0.20483	0.115269	0.151167
2020	4000	0.240266	0.195054	0.113677	0.113968	0.156688	0.113677	0.113968	0.113968	0.113968	0.113968	0.520779	0.198501	0.206431	0	0.174895	0.118566	0.163893	0.124812	0.113677	0.118785	0.113758	0.113677	0.113677	0.20483	0.115269	0.151167
2030	0	0	0	0	0	0	0	0	0	0	0	0	0	0	0	0	0	0	0	0	0	0	0	0	0	0	0
2030	20	0.567394	0.434878	0	0	0	0	0	0	0	0	0.377257	0.0497889	0	0	0.201202	0.157994	0	0	0	0.147751	0	0	0	0.477844	0	0
2030	40	0.567394	0.434878	0.183632	0.184075	0.244548	0.18213	0.184075	0.184075	0.184075	0.184075	0.68701	0.366825	0.429165	0	0.201338	0.221186	0.218243	0	0.183632	0.149676	0.131268	0.183632	0.183632	0.477844	0.254131	0
2030	60	0.617187	0.436318	0.183632	0.184075	0.244548	0.18213	0.184075	0.184075	0.184075	0.184075	0.68701	0.46426	0.429165	0	0.211669	0.221202	0.218243	0	0.183632	0.149676	0.18377	0.183632	0.183632	0.477844	0.254131	0
2030	80	0.617187	0.436318	0.183632	0.184125	0.260451	0.187967	0.184125	0.184125	0.184125	0.184125	0.68701	0.531098	0.429165	0	0.292903	0.239918	0.227427	0.00977722	0.183632	0.211564	0.204845	0.183632	0.183632	0.477844	0.436813	0
2030	100	0.617187	0.436318	0.183632	0.184125	0.260451	0.187967	0.184125	0.184125	0.184125	0.184125	0.68701	0.568454	0.429165	0	0.292903	0.239918	0.227427	0.00977722	0.183632	0.211564	0.204845	0.183632	0.183632	0.613059	0.436813	0
2030	120	0.617187	0.436318	0.183632	0.184125	0.260451	0.187967	0.184125	0.184125	0.184125	0.184125	0.68701	0.568454	0.429165	0	0.293158	0.239918	0.227427	0.00977722	0.183632	0.211564	0.204845	0.183632	0.183632	0.613059	0.436813	0
2030	140	0.617187	0.585162	0.183632	0.184125	0.260451	0.187967	0.184125	0.184125	0.184125	0.184125	0.74084	0.568454	0.429165	0	0.293158	0.239918	0.227427	0.00977722	0.183632	0.211564	0.204845	0.183632	0.183632	0.613059	0.436813	0
2030	160	0.617187	0.585162	0.183632	0.184125	0.260451	0.187967	0.184125	0.184125	0.184125	0.184125	0.74084	0.568454	0.58132	0	0.293158	0.239918	0.227427	0.00977722	0.183632	0.211564	0.204845	0.183632	0.183632	0.613059	0.436813	0
2030	180	0.617187	0.585162	0.183632	0.184125	0.260451	0.187967	0.184125	0.184125	0.184125	0.184125	0.74084	0.583115	0.58132	0	0.293158	0.239918	0.227427	0.00977722	0.183632	0.211564	0.204845	0.183632	0.183632	0.614489	0.436813	0
2030	200	0.617187	0.585162	0.183632	0.184125	0.260451	0.188138	0.184125	0.184125	0.184125	0.184125	0.74084	0.583115	0.58132	0	0.293158	0.239918	0.227427	0.00977722	0.341031	0.211564	0.211768	0.183632	0.183632	0.614489	0.436813	0
2030	220	0.617187	0.585162	0.183632	0.184125	0.470063	0.188138	0.184125	0.184125	0.184125	0.184125	0.74084	0.583115	0.58132	0	0.524048	0.239918	0.227427	0.00977722	0.341031	0.356134	0.211768	0.183632	0.183632	0.614489	0.436813	0
2030	240	0.617187	0.585162	0.341031	0.184125	0.470063	0.341031	0.184125	0.184125	0.184125	0.184125	0.757069	0.583115	0.58132	0	0.524048	0.239918	0.227427	0.00977722	0.341031	0.356134	0.341275	0.341031	0.341031	0.614489	0.546917	0
2030	260	0.617187	0.585162	0.341031	0.341903	0.470063	0.341031	0.341903	0.341903	0.341903	0.341903	0.757069	0.583115	0.58132	0	0.524684	0.355699	0.414492	0.00977722	0.341031	0.356134	0.341275	0.341031	0.341031	0.614489	0.546917	0
2030	280	0.617187	0.585162	0.341031	0.341903	0.470063	0.341031	0.341903	0.341903	0.341903	0.341903	0.757069	0.583115	0.58132	0	0.524684	0.355699	0.414492	0.00977722	0.341031	0.356134	0.341275	0.341031	0.341031	0.614489	0.546917	0
2030	300	0.617187	0.585162	0.341031	0.341903	0.470063	0.341031	0.341903	0.341903	0.341903	0.341903	0.757069	0.583115	0.58132	0	0.524684	0.355699	0.414492	0.00977722	0.341031	0.356134	0.341275	0.341031	0.341031	0.614489	0.546917	0
2030	320	0.617187	0.585162	0.341031	0.341903	0.470063	0.341031	0.341903	0.341903	0.341903	0.341903	0.805952	0.583115	0.58132	0	0.524684	0.355699	0.414492	0.00977722	0.341031	0.356134	0.341275	0.341031	0.341031	0.614489	0.546917	0
2030	340	0.617187	0.585162	0.341031	0.341903	0.470063	0.341031	0.341903	0.341903	0.341903	0.341903	0.805952	0.583115	0.58132	0	0.524684	0.355699	0.414492	0.00977722	0.341031	0.356134	0.341275	0.341031	0.341031	0.614489	0.546917	0
2030	360	0.617187	0.585162	0.341031	0.341903	0.470063	0.341031	0.341903	0.341903	0.341903	0.341903	0.805952	0.583115	0.58132	0	0.524684	0.355699	0.414492	0.00977722	0.341031	0.356134	0.341275	0.341031	0.341031	0.614489	0.546917	0
2030	380	0.617187	0.585162	0.341031	0.341903	0.470063	0.341031	0.341903	0.341903	0.341903	0.341903	0.805952	0.583115	0.58132	0	0.524684	0.355699	0.414492	0.00977722	0.341031	0.356134	0.341275	0.341031	0.341031	0.614489	0.546917	0
2030	400	0.617187	0.585162	0.341031	0.341903	0.470063	0.341031	0.341903	0.341903	0.341903	0.341903	0.805952	0.583115	0.58132	0	0.524684	0.355699	0.414492	0.00977722	0.341031	0.356134	0.341275	0.341031	0.341031	0.614489	0.546917	0
2030	420	0.617187	0.585162	0.341031	0.341903	0.470063	0.341031	0.341903	0.341903	0.341903	0.341903	0.805952	0.583115	0.58132	0	0.524684	0.355699	0.414492	0.00977722	0.341031	0.356134	0.341275	0.341031	0.341031	0.614489	0.546917	0
2030	440	0.617187	0.585162	0.341031	0.341903	0.470063	0.341031	0.341903	0.341903	0.341903	0.341903	0.805952	0.583115	0.58132	0	0.524684	0.355699	0.414492	0.00977722	0.341031	0.356134	0.341275	0.341031	0.341031	0.614489	0.546917	0
2030	460	0.617187	0.585162	0.341031	0.341903	0.470063	0.341031	0.341903	0.341903	0.341903	0.341903	0.805952	0.583115	0.58132	0	0.524684	0.355699	0.414492	0.00977722	0.341031	0.356134	0.341275	0.341031	0.341031	0.614489	0.546917	0
2030	480	0.617187	0.585162	0.341031	0.341903	0.470063	0.341031	0.341903	0.341903	0.341903	0.341903	0.805952	0.583115	0.58132	0	0.524684	0.355699	0.414492	0.00977722	0.341031	0.356134	0.341275	0.341031	0.341031	0.614489	0.546917	0
2030	500	0.617187	0.585162	0.341031	0.341903	0.470063	0.341031	0.341903	0.341903	0.341903	0.341903	0.805952	0.583115	0.58132	0	0.524684	0.355699	0.414492	0.00977722	0.341031	0.356134	0.341275	0.341031	0.341031	0.614489	0.546917	0
2030	520	0.617187	0.585162	0.341031	0.341903	0.470063	0.341031	0.341903	0.341903	0.341903	0.341903	0.805952	0.583115	0.58132	0	0.524684	0.355699	0.414492	0.00977722	0.341031	0.356134	0.341275	0.341031	0.341031	0.614489	0.546917	0
2030	540	0.617187	0.585162	0.341031	0.341903	0.470063	0.341031	0.341903	0.341903	0.341903	0.341903	0.805952	0.583115	0.58132	0	0.524684	0.355699	0.414492	0.00977722	0.341031	0.356134	0.341275	0.341031	0.341031	0.614489	0.546917	0
2030	560	0.617187	0.585162	0.341031	0.341903	0.470063	0.341031	0.341903	0.341903	0.341903	0.341903	0.805952	0.583115	0.58132	0	0.524684	0.355699	0.414492	0.00977722	0.341031	0.356134	0.341275	0.341031	0.341031	0.614489	0.546917	0
2030	580	0.617187	0.585162	0.341031	0.341903	0.470063	0.341031	0.341903	0.341903	0.341903	0.341903	0.805952	0.583115	0.58132	0	0.524684	0.355699	0.414492	0.00977722	0.341031	0.356134	0.341275	0.341031	0.341031	0.614489	0.546917	0
2030	600	0.617187	0.585162	0.341031	0.341903	0.470063	0.341031	0.341903	0.341903	0.341903	0.341903	0.805952	0.583115	0.58132	0	0.524684	0.355699	0.414492	0.00977722	0.341031	0.356134	0.341275	0.341031	0.341031	0.614489	0.546917	0
2030	620	0.617187	0.585162	0.341031	0.341903	0.470063	0.341031	0.341903	0.341903	0.341903	0.341903	0.805952	0.583115	0.58132	0	0.524684	0.355699	0.414492	0.00977722	0.341031	0.356134	0.341275	0.341031	0.341031	0.614489	0.546917	0
2030	640	0.617187	0.585162	0.341031	0.341903	0.470063	0.341031	0.341903	0.341903	0.341903	0.341903	0.805952	0.583115	0.58132	0	0.524684	0.355699	0.414492	0.00977722	0.341031	0.356134	0.341275	0.341031	0.341031	0.614489	0.546917	0
2030	660	0.617187	0.585162	0.341031	0.341903	0.470063	0.341031	0.341903	0.341903	0.341903	0.341903	0.805952	0.583115	0.58132	0	0.524684	0.355699	0.414492	0.00977722	0.341031	0.356134	0.341275	0.341031	0.341031	0.614489	0.546917	0
2030	680	0.617187	0.585162	0.341031	0.341903	0.470063	0.341031	0.341903	0.341903	0.341903	0.341903	0.805952	0.583115	0.58132	0	0.524684	0.355699	0.414492	0.00977722	0.341031	0.356134	0.341275	0.341031	0.341031	0.614489	0.546917	0
2030	700	0.617187	0.585162	0.341031	0.341903	0.470063	0.341031	0.341903	0.341903	0.341903	0.341903	0.805952	0.583115	0.58132	0	0.524684	0.355699	0.414492	0.374436	0.341031	0.356134	0.341275	0.341031	0.341031	0.614489	0.546917	0
2030	720	0.617187	0.585162	0.341031	0.341903	0.470063	0.341031	0.341903	0.341903	0.341903	0.341903	0.805952	0.583115	0.58132	0	0.524684	0.355699	0.414492	0.374436	0.341031	0.356134	0.341275	0.341031	0.341031	0.614489	0.546917	0
2030	740	0.617187	0.585162	0.341031	0.341903	0.470063	0.341031	0.341903	0.341903	0.341903	0.341903	0.805952	0.583115	0.58132	0	0.524684	0.355699	0.414492	0.374436	0.341031	0.356134	0.341275	0.341031	0.341031	0.614489	0.546917	0
2030	760	0.617187	0.585162	0.341031	0.341903	0.470063	0.341031	0.341903	0.341903	0.341903	0.341903	0.805952	0.583115	0.58132	0	0.524684	0.355699	0.414492	0.374436	0.341031	0.356134	0.341275	0.341031	0.341031	0.614489	0.546917	0
2030	780	0.617187	0.585162	0.341031	0.341903	0.470063	0.341031	0.341903	0.341903	0.341903	0.341903	0.805952	0.583115	0.58132	0	0.524684	0.355699	0.414492	0.374436	0.341031	0.356134	0.341275	0.341031	0.341031	0.614489	0.546917	0
2030	800	0.617187	0.585162	0.341031	0.341903	0.470063	0.341031	0.341903	0.341903	0.341903	0.341903	0.805952	0.583115	0.58132	0	0.524684	0.355699	0.414492	0.374436	0.341031	0.356134	0.341275	0.341031	0.341031	0.614489	0.546917	0
2030	820	0.720798	0.585162	0.341031	0.341903	0.470063	0.341031	0.341903	0.341903	0.341903	0.341903	0.805952	0.583115	0.58132	0	0.524684	0.355699	0.414492	0.374436	0.341031	0.356134	0.341275	0.341031	0.341031	0.614489	0.546917	0
2030	840	0.720798	0.585162	0.341031	0.341903	0.470063	0.341031	0.341903	0.341903	0.341903	0.341903	0.805952	0.583115	0.58132	0	0.524684	0.355699	0.414492	0.374436	0.341031	0.356134	0.341275	0.341031	0.341031	0.614489	0.546917	0
2030	860	0.720798	0.585162	0.341031	0.341903	0.470063	0.341031	0.341903	0.341903	0.341903	0.341903	0.805952	0.583115	0.58132	0	0.524684	0.355699	0.414492	0.374436	0.341031	0.356134	0.341275	0.341031	0.341031	0.614489	0.546917	0
2030	880	0.720798	0.585162	0.341031	0.341903	0.470063	0.341031	0.341903	0.341903	0.341903	0.341903	0.805952	0.583115	0.58132	0	0.524684	0.355699	0.414492	0.374436	0.341031	0.356134	0.341275	0.341031	0.341031	0.614489	0.546917	0
2030	900	0.720798	0.585162	0.341031	0.341903	0.470063	0.341031	0.341903	0.341903	0.341903	0.341903	0.805952	0.583115	0.58132	0	0.524684	0.355699	0.414492	0.374436	0.341031	0.356134	0.341275	0.341031	0.341031	0.614489	0.546917	0
2030	920	0.720798	0.585162	0.341031	0.341903	0.470063	0.341031	0.341903	0.341903	0.341903	0.341903	0.805952	0.583115	0.58132	0	0.524684	0.355699	0.414492	0.374436	0.341031	0.356134	0.341275	0.341031	0.341031	0.614489	0.546917	0
2030	940	0.720798	0.585162	0.341031	0.341903	0.470063	0.341031	0.341903	0.341903	0.341903	0.341903	0.805952	0.583115	0.58132	0	0.524684	0.355699	0.414492	0.374436	0.341031	0.356134	0.341275	0.341031	0.341031	0.614489	0.546917	0
2030	960	0.720798	0.585162	0.341031	0.341903	0.470063	0.341031	0.341903	0.341903	0.341903	0.341903	0.805952	0.583115	0.58132	0	0.524684	0.355699	0.414492	0.374436	0.341031	0.356134	0.341275	0.341031	0.341031	0.614489	0.546917	0
2030	980	0.720798	0.585162	0.341031	0.341903	0.470063	0.341031	0.341903	0.341903	0.341903	0.341903	0.805952	0.583115	0.58132	0	0.524684	0.355699	0.414492	0.374436	0.341031	0.356134	0.341275	0.341031	0.341031	0.614489	0.546917	0
2030	1000	0.720798	0.585162	0.341031	0.341903	0.470063	0.341031	0.341903	0.341903	0.341903	0.341903	0.805952	0.583115	0.58132	0	0.524684	0.355699	0.414492	0.374436	0.341031	0.356134	0.341275	0.341031	0.341031	0.614489	0.546917	0
2030	1020	0.720798	0.585162	0.341031	0.341903	0.470063	0.341031	0.341903	0.341903	0.341903	0.341903	0.805952	0.583115	0.58132	0	0.524684	0.355699	0.414492	0.374436	0.341031	0.356134	0.341275	0.341031	0.341031	0.614489	0.546917	0
2030	1040	0.720798	0.585162	0.341031	0.341903	0.470063	0.341031	0.341903	0.341903	0.341903	0.341903	0.805952	0.583115	0.58132	0	0.524684	0.355699	0.414492	0.374436	0.341031	0.356134	0.341275	0.341031	0.341031	0.614489	0.546917	0
2030	1060	0.720798	0.585162	0.341031	0.341903	0.470063	0.341031	0.341903	0.341903	0.341903	0.341903	0.805952	0.583115	0.58132	0	0.524684	0.355699	0.414492	0.374436	0.341031	0.356134	0.341275	0.341031	0.341031	0.614489	0.546917	0
2030	1080	0.720798	0.585162	0.341031	0.341903	0.470063	0.341031	0.341903	0.341903	0.341903	0.341903	0.805952	0.583115	0.58132	0	0.524684	0.355699	0.414492	0.374436	0.341031	0.356134	0.341275	0.341031	0.341031	0.614489	0.546917	0
2030	1100	0.720798	0.585162	0.341031	0.341903	0.470063	0.341031	0.341903	0.341903	0.341903	0.341903	0.805952	0.583115	0.58132	0	0.524684	0.355699	0.414492	0.374436	0.341031	0.356134	0.341275	0.341031	0.341031	0.614489	0.546917	0
2030	1120	0.720798	0.585162	0.341031	0.341903	0.470063	0.341031	0.341903	0.341903	0.341903	0.341903	0.805952	0.583115	0.58132	0	0.524684	0.355699	0.414492	0.374436	0.341031	0.356134	0.341275	0.341031	0.341031	0.614489	0.546917	0
2030	1140	0.720798	0.585162	0.341031	0.341903	0.470063	0.341031	0.341903	0.341903	0.341903	0.341903	0.805952	0.583115	0.58132	0	0.524684	0.355699	0.414492	0.374436	0.341031	0.356134	0.341275	0.341031	0.341031	0.614489	0.546917	0
2030	1160	0.720798	0.585162	0.341031	0.341903	0.470063	0.341031	0.341903	0.341903	0.341903	0.341903	0.805952	0.583115	0.58132	0	0.524684	0.355699	0.414492	0.374436	0.341031	0.356134	0.341275	0.341031	0.341031	0.614489	0.546917	0
2030	1180	0.720798	0.585162	0.341031	0.341903	0.470063	0.341031	0.341903	0.341903	0.341903	0.341903	0.805952	0.583115	0.58132	0	0.524684	0.355699	0.414492	0.374436	0.341031	0.356134	0.341275	0.341031	0.341031	0.614489	0.546917	0
2030	1200	0.720798	0.585162	0.341031	0.341903	0.470063	0.341031	0.341903	0.341903	0.341903	0.341903	0.808583	0.583115	0.58132	0	0.524684	0.355699	0.414492	0.374436	0.341031	0.356134	0.341275	0.341031	0.341031	0.614489	0.546917	0
2030	1220	0.720798	0.585162	0.341031	0.341903	0.470063	0.341031	0.341903	0.341903	0.341903	0.341903	0.808583	0.583115	0.58132	0	0.524684	0.355699	0.414492	0.374436	0.341031	0.356134	0.341275	0.341031	0.341031	0.614489	0.546917	0
2030	1240	0.720798	0.585162	0.341031	0.341903	0.470063	0.341031	0.341903	0.341903	0.341903	0.341903	0.808583	0.583115	0.58132	0	0.524684	0.355699	0.414492	0.374436	0.341031	0.356134	0.341275	0.341031	0.341031	0.614489	0.546917	0
2030	1260	0.720798	0.585162	0.341031	0.341903	0.470063	0.341031	0.341903	0.341903	0.341903	0.341903	0.808583	0.583115	0.58132	0	0.524684	0.355699	0.414492	0.374436	0.341031	0.356134	0.341275	0.341031	0.341031	0.614489	0.546917	0
2030	1280	0.720798	0.585162	0.341031	0.341903	0.470063	0.341031	0.341903	0.341903	0.341903	0.341903	0.808583	0.583115	0.58132	0	0.524684	0.355699	0.414492	0.374436	0.341031	0.356134	0.341275	0.341031	0.341031	0.614489	0.546917	0
2030	1300	0.720798	0.585162	0.341031	0.341903	0.470063	0.341031	0.341903	0.341903	0.341903	0.341903	0.808583	0.583115	0.58132	0	0.524684	0.355699	0.414492	0.374436	0.341031	0.356134	0.341275	0.341031	0.341031	0.614489	0.546917	0
2030	1320	0.720798	0.585162	0.341031	0.341903	0.470063	0.341031	0.341903	0.341903	0.341903	0.341903	0.808583	0.583115	0.58132	0	0.524684	0.355699	0.414492	0.374436	0.341031	0.356134	0.341275	0.341031	0.341031	0.614489	0.546917	0
2030	1340	0.720798	0.585162	0.341031	0.341903	0.470063	0.341031	0.341903	0.341903	0.341903	0.341903	0.808583	0.583115	0.58132	0	0.524684	0.355699	0.414492	0.374436	0.341031	0.356134	0.341275	0.341031	0.341031	0.614489	0.546917	0
2030	1360	0.720798	0.585162	0.341031	0.341903	0.470063	0.341031	0.341903	0.341903	0.341903	0.341903	0.808583	0.583115	0.58132	0	0.524684	0.355699	0.414492	0.374436	0.341031	0.356134	0.341275	0.341031	0.341031	0.614489	0.546917	0
2030	1380	0.720798	0.585162	0.341031	0.341903	0.470063	0.341031	0.341903	0.341903	0.341903	0.341903	0.808583	0.583115	0.58132	0	0.524684	0.355699	0.414492	0.374436	0.341031	0.356134	0.341275	0.341031	0.341031	0.614489	0.546917	0
2030	1400	0.720798	0.585162	0.341031	0.341903	0.470063	0.341031	0.341903	0.341903	0.341903	0.341903	0.808583	0.583115	0.58132	0	0.524684	0.355699	0.414492	0.374436	0.341031	0.356134	0.341275	0.341031	0.341031	0.614489	0.546917	0
2030	1420	0.720798	0.585162	0.341031	0.341903	0.470063	0.341031	0.341903	0.341903	0.341903	0.341903	0.808583	0.583115	0.58132	0	0.524684	0.355699	0.414492	0.374436	0.341031	0.356134	0.341275	0.341031	0.341031	0.614489	0.546917	0
2030	1440	0.720798	0.585162	0.341031	0.341903	0.470063	0.341031	0.341903	0.341903	0.341903	0.341903	0.808583	0.583115	0.58132	0	0.524684	0.355699	0.414492	0.374436	0.341031	0.356134	0.341275	0.341031	0.341031	0.614489	0.546917	0
2030	1460	0.720798	0.585162	0.341031	0.341903	0.470063	0.341031	0.341903	0.341903	0.341903	0.341903	0.808583	0.583115	0.58132	0	0.524684	0.355699	0.414492	0.374436	0.341031	0.356134	0.341275	0.341031	0.341031	0.614489	0.546917	0
2030	1480	0.720798	0.585162	0.341031	0.341903	0.470063	0.341031	0.341903	0.341903	0.341903	0.341903	0.808583	0.583115	0.58132	0	0.524684	0.355699	0.414492	0.374436	0.341031	0.356134	0.341275	0.341031	0.341031	0.614489	0.546917	0
2030	1500	0.720798	0.585162	0.341031	0.341903	0.470063	0.341031	0.341903	0.341903	0.341903	0.341903	0.808583	0.583115	0.58132	0	0.524684	0.355699	0.414492	0.374436	0.341031	0.356134	0.341275	0.341031	0.341031	0.614489	0.546917	0
2030	1520	0.720798	0.585162	0.341031	0.341903	0.470063	0.341031	0.341903	0.341903	0.341903	0.341903	0.808583	0.583115	0.58132	0	0.524684	0.355699	0.414492	0.374436	0.341031	0.356134	0.341275	0.341031	0.341031	0.614489	0.546917	0
2030	1540	0.720798	0.585162	0.341031	0.341903	0.470063	0.341031	0.341903	0.341903	0.341903	0.341903	0.808583	0.583115	0.58132	0	0.524684	0.355699	0.414492	0.374436	0.341031	0.356134	0.341275	0.341031	0.341031	0.614489	0.546917	0
2030	1560	0.720798	0.585162	0.341031	0.341903	0.470063	0.341031	0.341903	0.341903	0.341903	0.341903	0.808583	0.583115	0.58132	0	0.524684	0.355699	0.414492	0.374436	0.341031	0.356134	0.341275	0.341031	0.341031	0.614489	0.546917	0
2030	1580	0.720798	0.585162	0.341031	0.341903	0.470063	0.341031	0.341903	0.341903	0.341903	0.341903	0.808583	0.583115	0.58132	0	0.524684	0.355699	0.414492	0.374436	0.341031	0.356134	0.341275	0.341031	0.341031	0.614489	0.546917	0
2030	1600	0.720798	0.585162	0.341031	0.341903	0.470063	0.341031	0.341903	0.341903	0.341903	0.341903	0.808583	0.583276	0.58132	0	0.524684	0.355699	0.414492	0.374436	0.341031	0.356134	0.341275	0.341031	0.341031	0.614489	0.546917	0
2030	1620	0.720798	0.585162	0.341031	0.341903	0.470063	0.341031	0.341903	0.341903	0.341903	0.341903	0.808583	0.583276	0.58132	0	0.524684	0.355699	0.414492	0.374436	0.341031	0.356134	0.341275	0.341031	0.341031	0.614489	0.546917	0
2030	1640	0.720798	0.585162	0.341031	0.341903	0.470063	0.341031	0.341903	0.341903	0.341903	0.341903	0.808583	0.583276	0.58132	0	0.524684	0.355699	0.414492	0.374436	0.341031	0.356134	0.341275	0.341031	0.341031	0.614489	0.546917	0
2030	1660	0.720798	0.585162	0.341031	0.341903	0.470063	0.341031	0.341903	0.341903	0.341903	0.341903	0.808583	0.583276	0.58132	0	0.524684	0.355699	0.414492	0.374436	0.341031	0.356134	0.341275	0.341031	0.341031	0.614489	0.546917	0
2030	1680	0.720798	0.585162	0.341031	0.341903	0.470063	0.341031	0.341903	0.341903	0.341903	0.341903	0.808583	0.583276	0.58132	0	0.524684	0.355699	0.414492	0.374436	0.341031	0.356134	0.341275	0.341031	0.341031	0.614489	0.546917	0
2030	1700	0.720798	0.585162	0.341031	0.341903	0.470063	0.341031	0.341903	0.341903	0.341903	0.341903	0.808583	0.583276	0.58132	0	0.524684	0.355699	0.414492	0.374436	0.341031	0.356134	0.341275	0.341031	0.341031	0.614489	0.546917	0
2030	1720	0.720798	0.585162	0.341031	0.341903	0.470063	0.341031	0.341903	0.341903	0.341903	0.341903	0.808583	0.583276	0.58132	0	0.524684	0.355699	0.414492	0.374436	0.341031	0.356134	0.341275	0.341031	0.341031	0.614489	0.546917	0
2030	1740	0.720798	0.585162	0.341031	0.341903	0.470063	0.341031	0.341903	0.341903	0.341903	0.341903	0.808583	0.583276	0.58132	0	0.524684	0.355699	0.414492	0.374436	0.341031	0.356134	0.341275	0.341031	0.341031	0.614489	0.546917	0
2030	1760	0.720798	0.585162	0.341031	0.341903	0.470063	0.341031	0.341903	0.341903	0.341903	0.341903	0.808583	0.583276	0.58132	0	0.524684	0.355699	0.414492	0.374436	0.341031	0.356134	0.341275	0.341031	0.341031	0.614489	0.546917	0
2030	1780	0.720798	0.585162	0.341031	0.341903	0.470063	0.341031	0.341903	0.341903	0.341903	0.341903	0.808583	0.583276	0.58132	0	0.524684	0.355699	0.414492	0.374436	0.341031	0.356134	0.341275	0.341031	0.341031	0.614489	0.546917	0
2030	1800	0.720798	0.585162	0.341031	0.341903	0.470063	0.341031	0.341903	0.341903	0.341903	0.341903	0.808583	0.583276	0.58132	0	0.524684	0.355699	0.414492	0.374436	0.341031	0.356134	0.341275	0.341031	0.341031	0.614489	0.546917	0
2030	1820	0.720798	0.585162	0.341031	0.341903	0.470063	0.341031	0.341903	0.341903	0.341903	0.341903	0.808583	0.583276	0.58132	0	0.524684	0.355699	0.414492	0.374436	0.341031	0.356134	0.341275	0.341031	0.341031	0.614489	0.546917	0
2030	1840	0.720798	0.585162	0.341031	0.341903	0.470063	0.341031	0.341903	0.341903	0.341903	0.341903	0.808583	0.583276	0.58132	0	0.524684	0.355699	0.414492	0.374436	0.341031	0.356134	0.341275	0.341031	0.341031	0.614489	0.546917	0
2030	1860	0.720798	0.585162	0.341031	0.341903	0.470063	0.341031	0.341903	0.341903	0.341903	0.341903	0.808583	0.583276	0.58132	0	0.524684	0.355699	0.414492	0.374436	0.341031	0.356134	0.341275	0.341031	0.341031	0.614489	0.546917	0
2030	1880	0.720798	0.585162	0.341031	0.341903	0.470063	0.341031	0.341903	0.341903	0.341903	0.341903	0.808583	0.583276	0.58132	0	0.524684	0.355699	0.414492	0.374436	0.341031	0.356134	0.341275	0.341031	0.341031	0.614489	0.546917	0
2030	1900	0.720798	0.585162	0.341031	0.341903	0.470063	0.341031	0.341903	0.341903	0.341903	0.341903	0.808583	0.583276	0.58132	0	0.524684	0.355699	0.414492	0.374436	0.341031	0.356134	0.341275	0.341031	0.341031	0.614489	0.546917	0
2030	1920	0.720798	0.585162	0.341031	0.341903	0.470063	0.341031	0.341903	0.341903	0.341903	0.341903	0.808583	0.583276	0.58132	0	0.524684	0.355699	0.414492	0.374436	0.341031	0.356134	0.341275	0.341031	0.341031	0.614489	0.546917	0
2030	1940	0.720798	0.585162	0.341031	0.341903	0.470063	0.341031	0.341903	0.341903	0.341903	0.341903	0.808583	0.583276	0.58132	0	0.524684	0.355699	0.414492	0.374436	0.341031	0.356134	0.341275	0.341031	0.341031	0.614489	0.546917	0
2030	1960	0.720798	0.585162	0.341031	0.341903	0.470063	0.341031	0.341903	0.341903	0.341903	0.341903	0.808583	0.583276	0.58132	0	0.524684	0.355699	0.414492	0.374436	0.341031	0.356134	0.341275	0.341031	0.341031	0.614489	0.546917	0
2030	1980	0.720798	0.585162	0.341031	0.341903	0.470063	0.341031	0.341903	0.341903	0.341903	0.341903	0.808583	0.583276	0.58132	0	0.524684	0.355699	0.414492	0.374436	0.341031	0.356134	0.341275	0.341031	0.341031	0.614489	0.546917	0
2030	2000	0.720798	0.585162	0.341031	0.341903	0.470063	0.341031	0.341903	0.341903	0.341903	0.341903	0.808583	0.583276	0.58132	0	0.524684	0.355699	0.414492	0.374436	0.341031	0.356134	0.341275	0.341031	0.341031	0.614489	0.546917	0
2030	2020	0.720798	0.585162	0.341031	0.341903	0.470063	0.341031	0.341903	0.341903	0.341903	0.341903	0.808583	0.583276	0.58132	0	0.524684	0.355699	0.414492	0.374436	0.341031	0.356134	0.341275	0.341031	0.341031	0.614489	0.546917	0
2030	2040	0.720798	0.585162	0.341031	0.341903	0.470063	0.341031	0.341903	0.341903	0.341903	0.341903	0.808583	0.583276	0.58132	0	0.524684	0.355699	0.414492	0.374436	0.341031	0.356134	0.341275	0.341031	0.341031	0.614489	0.546917	0
2030	2060	0.720798	0.585162	0.341031	0.341903	0.470063	0.341031	0.341903	0.341903	0.341903	0.341903	0.808583	0.583276	0.58132	0	0.524684	0.355699	0.414492	0.374436	0.341031	0.356134	0.341275	0.341031	0.341031	0.614489	0.546917	0
2030	2080	0.720798	0.585162	0.341031	0.341903	0.470063	0.341031	0.341903	0.341903	0.341903	0.341903	0.808583	0.583276	0.58132	0	0.524684	0.355699	0.414492	0.374436	0.341031	0.356134	0.341275	0.341031	0.341031	0.614489	0.546917	0
2030	2100	0.720798	0.585162	0.341031	0.341903	0.470063	0.341031	0.341903	0.341903	0.341903	0.341903	0.808583	0.583276	0.58132	0	0.524684	0.355699	0.414492	0.374436	0.341031	0.356134	0.341275	0.341031	0.341031	0.614489	0.546917	0
2030	2120	0.720798	0.585162	0.341031	0.341903	0.470063	0.341031	0.341903	0.341903	0.341903	0.341903	0.808583	0.583276	0.58132	0	0.524684	0.355699	0.414492	0.374436	0.341031	0.356134	0.341275	0.341031	0.341031	0.614489	0.546917	0
2030	2140	0.720798	0.585162	0.341031	0.341903	0.470063	0.341031	0.341903	0.341903	0.341903	0.341903	0.808583	0.583276	0.58132	0	0.524684	0.355699	0.414492	0.374436	0.341031	0.356134	0.341275	0.341031	0.341031	0.614489	0.546917	0
2030	2160	0.720798	0.585162	0.341031	0.341903	0.470063	0.341031	0.341903	0.341903	0.341903	0.341903	0.808583	0.583276	0.58132	0	0.524684	0.355699	0.414492	0.374436	0.341031	0.356134	0.341275	0.341031	0.341031	0.614489	0.546917	0
2030	2180	0.720798	0.585162	0.341031	0.341903	0.470063	0.341031	0.341903	0.341903	0.341903	0.341903	0.808583	0.583276	0.58132	0	0.524684	0.355699	0.414492	0.374436	0.341031	0.356134	0.341275	0.341031	0.341031	0.614489	0.546917	0
2030	2200	0.720798	0.585162	0.341031	0.341903	0.470063	0.341031	0.341903	0.341903	0.341903	0.341903	0.808583	0.583276	0.58132	0	0.524684	0.355699	0.414492	0.374436	0.341031	0.356134	0.341275	0.341031	0.341031	0.614489	0.546917	0
2030	2220	0.720798	0.585162	0.341031	0.341903	0.470063	0.341031	0.341903	0.341903	0.341903	0.341903	0.808583	0.583276	0.58132	0	0.524684	0.355699	0.414492	0.374436	0.341031	0.356134	0.341275	0.341031	0.341031	0.614489	0.546917	0
2030	2240	0.720798	0.585162	0.341031	0.341903	0.470063	0.341031	0.341903	0.341903	0.341903	0.341903	0.808583	0.583276	0.58132	0	0.524684	0.355699	0.414492	0.374436	0.341031	0.356134	0.341275	0.341031	0.341031	0.614489	0.546917	0
2030	2260	0.720798	0.585162	0.341031	0.341903	0.470063	0.341031	0.341903	0.341903	0.341903	0.341903	0.808583	0.583276	0.58132	0	0.524684	0.355699	0.414492	0.374436	0.341031	0.356134	0.341275	0.341031	0.341031	0.614489	0.546917	0
2030	2280	0.720798	0.585162	0.341031	0.341903	0.470063	0.341031	0.341903	0.341903	0.341903	0.341903	0.808583	0.583276	0.58132	0	0.524684	0.355699	0.414492	0.374436	0.341031	0.356134	0.341275	0.341031	0.341031	0.614489	0.546917	0
2030	2300	0.720798	0.585162	0.341031	0.341903	0.470063	0.341031	0.341903	0.341903	0.341903	0.341903	0.808583	0.583276	0.58132	0	0.524684	0.355699	0.414492	0.374436	0.341031	0.356134	0.341275	0.341031	0.341031	0.614489	0.546917	0
2030	2320	0.720798	0.585162	0.341031	0.341903	0.470063	0.341031	0.341903	0.341903	0.341903	0.341903	0.808583	0.583276	0.58132	0	0.524684	0.355699	0.414492	0.374436	0.341031	0.356134	0.341275	0.341031	0.341031	0.614489	0.546917	0
2030	2340	0.720798	0.585162	0.341031	0.341903	0.470063	0.341031	0.341903	0.341903	0.341903	0.341903	0.808583	0.583276	0.58132	0	0.524684	0.355699	0.414492	0.374436	0.341031	0.356134	0.341275	0.341031	0.341031	0.614489	0.546917	0
2030	2360	0.720798	0.585162	0.341031	0.341903	0.470063	0.341031	0.341903	0.341903	0.341903	0.341903	0.808583	0.583276	0.58132	0	0.524684	0.355699	0.414492	0.374436	0.341031	0.356134	0.341275	0.341031	0.341031	0.614489	0.546917	0
2030	2380	0.720798	0.585162	0.341031	0.341903	0.470063	0.341031	0.341903	0.341903	0.341903	0.341903	0.808583	0.583276	0.58132	0	0.524684	0.355699	0.414492	0.374436	0.341031	0.356134	0.341275	0.341031	0.341031	0.614489	0.546917	0
2030	2400	0.720798	0.585162	0.341031	0.341903	0.470063	0.341031	0.341903	0.341903	0.341903	0.341903	0.808583	0.583276	0.58132	0	0.524684	0.355699	0.414492	0.374436	0.341031	0.356134	0.341275	0.341031	0.341031	0.614489	0.546917	0
2030	2420	0.720798	0.585162	0.341031	0.341903	0.470063	0.341031	0.341903	0.341903	0.341903	0.341903	0.808583	0.583276	0.58132	0	0.524684	0.355699	0.414492	0.374436	0.341031	0.356134	0.341275	0.341031	0.341031	0.614489	0.546917	0
2030	2440	0.720798	0.585162	0.341031	0.341903	0.470063	0.341031	0.341903	0.341903	0.341903	0.341903	0.808583	0.583276	0.58132	0	0.524684	0.355699	0.414492	0.374436	0.341031	0.356134	0.341275	0.341031	0.341031	0.614489	0.546917	0
2030	2460	0.720798	0.585162	0.341031	0.341903	0.470063	0.341031	0.341903	0.341903	0.341903	0.341903	0.808583	0.583276	0.58132	0	0.524684	0.355699	0.414492	0.374436	0.341031	0.356134	0.341275	0.341031	0.341031	0.614489	0.546917	0
2030	2480	0.720798	0.585162	0.341031	0.341903	0.470063	0.341031	0.341903	0.341903	0.341903	0.341903	0.808583	0.583276	0.58132	0	0.524684	0.355699	0.414492	0.374436	0.341031	0.356134	0.341275	0.341031	0.341031	0.614489	0.546917	0
2030	2500	0.720798	0.585162	0.341031	0.341903	0.470063	0.341031	0.341903	0.341903	0.341903	0.341903	0.808583	0.583276	0.58132	0	0.524684	0.355699	0.414492	0.374436	0.341031	0.356134	0.341275	0.341031	0.341031	0.614489	0.546917	0
2030	2520	0.720798	0.585162	0.341031	0.341903	0.470063	0.341031	0.341903	0.341903	0.341903	0.341903	0.808583	0.583276	0.58132	0	0.524684	0.355699	0.414492	0.374436	0.341031	0.356134	0.341275	0.341031	0.341031	0.614489	0.546917	0
2030	2540	0.720798	0.585162	0.341031	0.341903	0.470063	0.341031	0.341903	0.341903	0.341903	0.341903	0.808583	0.583276	0.58132	0	0.524684	0.355699	0.414492	0.374436	0.341031	0.356134	0.341275	0.341031	0.341031	0.614489	0.546917	0
2030	2560	0.720798	0.585162	0.341031	0.341903	0.470063	0.341031	0.341903	0.341903	0.341903	0.341903	0.808583	0.583276	0.58132	0	0.524684	0.355699	0.414492	0.374436	0.341031	0.356134	0.341275	0.341031	0.341031	0.614489	0.546917	0
2030	2580	0.720798	0.585162	0.341031	0.341903	0.470063	0.341031	0.341903	0.341903	0.341903	0.341903	0.808583	0.583276	0.58132	0	0.524684	0.355699	0.414492	0.374436	0.341031	0.356134	0.341275	0.341031	0.341031	0.614489	0.546917	0
2030	2600	0.720798	0.585162	0.341031	0.341903	0.470063	0.341031	0.341903	0.341903	0.341903	0.341903	0.808583	0.583276	0.58132	0	0.524684	0.355699	0.414492	0.374436	0.341031	0.356134	0.341275	0.341031	0.341031	0.614489	0.546917	0
2030	2620	0.720798	0.585162	0.341031	0.341903	0.470063	0.341031	0.341903	0.341903	0.341903	0.341903	0.808583	0.583276	0.58132	0	0.524684	0.355699	0.414492	0.374436	0.341031	0.356134	0.341275	0.341031	0.341031	0.614489	0.546917	0
2030	2640	0.720798	0.585162	0.341031	0.341903	0.470063	0.341031	0.341903	0.341903	0.341903	0.341903	0.808583	0.583276	0.58132	0	0.524684	0.355699	0.414492	0.374436	0.341031	0.356134	0.341275	0.341031	0.341031	0.614489	0.546917	0
2030	2660	0.720798	0.585162	0.341031	0.341903	0.470063	0.341031	0.341903	0.341903	0.341903	0.341903	0.808583	0.583276	0.58132	0	0.524684	0.355699	0.414492	0.374436	0.341031	0.356134	0.341275	0.341031	0.341031	0.614489	0.546917	0
2030	2680	0.720798	0.585162	0.341031	0.341903	0.470063	0.341031	0.341903	0.341903	0.341903	0.341903	0.808583	0.583276	0.58132	0	0.524684	0.355699	0.414492	0.374436	0.341031	0.356134	0.341275	0.341031	0.341031	0.614489	0.546917	0
2030	2700	0.720798	0.585162	0.341031	0.341903	0.470063	0.341031	0.341903	0.341903	0.341903	0.341903	0.808583	0.583276	0.58132	0	0.524684	0.355699	0.414492	0.374436	0.341031	0.356134	0.341275	0.341031	0.341031	0.614489	0.546917	0
2030	2720	0.720798	0.585162	0.341031	0.341903	0.470063	0.341031	0.341903	0.341903	0.341903	0.341903	0.808583	0.583276	0.58132	0	0.524684	0.355699	0.414492	0.374436	0.341031	0.356134	0.341275	0.341031	0.341031	0.614489	0.546917	0
2030	2740	0.720798	0.585162	0.341031	0.341903	0.470063	0.341031	0.341903	0.341903	0.341903	0.341903	0.808583	0.583276	0.58132	0	0.524684	0.355699	0.414492	0.374436	0.341031	0.356134	0.341275	0.341031	0.341031	0.614489	0.546917	0
2030	2760	0.720798	0.585162	0.341031	0.341903	0.470063	0.341031	0.341903	0.341903	0.341903	0.341903	0.808583	0.583276	0.58132	0	0.524684	0.355699	0.414492	0.374436	0.341031	0.356134	0.341275	0.341031	0.341031	0.614489	0.546917	0
2030	2780	0.720798	0.585162	0.341031	0.341903	0.470063	0.341031	0.341903	0.341903	0.341903	0.341903	0.808583	0.583276	0.58132	0	0.524684	0.355699	0.414492	0.374436	0.341031	0.356134	0.341275	0.341031	0.341031	0.614489	0.546917	0
2030	2800	0.720798	0.585162	0.341031	0.341903	0.470063	0.341031	0.341903	0.341903	0.341903	0.341903	0.808583	0.583276	0.58132	0	0.524684	0.355699	0.414492	0.374436	0.341031	0.356134	0.341275	0.341031	0.341031	0.614489	0.546917	0
2030	2820	0.720798	0.585162	0.341031	0.341903	0.470063	0.341031	0.341903	0.341903	0.341903	0.341903	0.808583	0.583276	0.58132	0	0.524684	0.355699	0.414492	0.374436	0.341031	0.356134	0.341275	0.341031	0.341031	0.614489	0.546917	0
2030	2840	0.720798	0.585162	0.341031	0.341903	0.470063	0.341031	0.341903	0.341903	0.341903	0.341903	0.808583	0.583276	0.58132	0	0.524684	0.355699	0.414492	0.374436	0.341031	0.356134	0.341275	0.341031	0.341031	0.614489	0.546917	0
2030	2860	0.720798	0.585162	0.341031	0.341903	0.470063	0.341031	0.341903	0.341903	0.341903	0.341903	0.808583	0.583276	0.58132	0	0.524684	0.355699	0.414492	0.374436	0.341031	0.356134	0.341275	0.341031	0.341031	0.614489	0.546917	0
2030	2880	0.720798	0.585162	0.341031	0.341903	0.470063	0.341031	0.341903	0.341903	0.341903	0.341903	0.808583	0.583276	0.58132	0	0.524684	0.355699	0.414492	0.374436	0.341031	0.356134	0.341275	0.341031	0.341031	0.614489	0.546917	0
2030	2900	0.720798	0.585162	0.341031	0.341903	0.470063	0.341031	0.341903	0.341903	0.341903	0.341903	0.808583	0.583276	0.58132	0	0.524684	0.355699	0.414492	0.374436	0.341031	0.356134	0.341275	0.341031	0.341031	0.614489	0.546917	0
2030	2920	0.720798	0.585162	0.341031	0.341903	0.470063	0.341031	0.341903	0.341903	0.341903	0.341903	0.808583	0.583276	0.58132	0	0.524684	0.355699	0.414492	0.374436	0.341031	0.356134	0.341275	0.341031	0.341031	0.614489	0.546917	0
2030	2940	0.720798	0.585162	0.341031	0.341903	0.470063	0.341031	0.341903	0.341903	0.341903	0.341903	0.808583	0.583276	0.58132	0	0.524684	0.355699	0.414492	0.374436	0.341031	0.356134	0.341275	0.341031	0.341031	0.614489	0.546917	0
2030	2960	0.720798	0.585162	0.341031	0.341903	0.470063	0.341031	0.341903	0.341903	0.341903	0.341903	0.808583	0.583276	0.58132	0	0.524684	0.355699	0.414492	0.374436	0.341031	0.356134	0.341275	0.341031	0.341031	0.614489	0.546917	0
2030	2980	0.720798	0.585162	0.341031	0.341903	0.470063	0.341031	0.341903	0.341903	0.341903	0.341903	0.808583	0.583276	0.58132	0	0.524684	0.355699	0.414492	0.374436	0.341031	0.356134	0.341275	0.341031	0.341031	0.614489	0.546917	0
2030	3000	0.720798	0.585162	0.341031	0.341903	0.470063	0.341031	0.341903	0.341903	0.341903	0.341903	0.808583	0.583276	0.58132	0	0.524684	0.355699	0.414492	0.374436	0.341031	0.356134	0.341275	0.341031	0.341031	0.614489	0.546917	0
2030	3020	0.720798	0.585162	0.341031	0.341903	0.470063	0.341031	0.341903	0.341903	0.341903	0.341903	0.808583	0.583276	0.58132	0	0.524684	0.355699	0.414492	0.374436	0.341031	0.356134	0.341275	0.341031	0.341031	0.614489	0.546917	0
2030	3040	0.720798	0.585162	0.341031	0.341903	0.470063	0.341031	0.341903	0.341903	0.341903	0.341903	0.808583	0.583276	0.58132	0	0.524684	0.355699	0.414492	0.374436	0.341031	0.356134	0.341275	0.341031	0.341031	0.614489	0.546917	0
2030	3060	0.720798	0.585162	0.341031	0.341903	0.470063	0.341031	0.341903	0.341903	0.341903	0.341903	0.808583	0.583276	0.58132	0	0.524684	0.355699	0.414492	0.374436	0.341031	0.356134	0.341275	0.341031	0.341031	0.614489	0.546917	0
2030	3080	0.720798	0.585162	0.341031	0.341903	0.470063	0.341031	0.341903	0.341903	0.341903	0.341903	0.808583	0.583276	0.58132	0	0.524684	0.355699	0.414492	0.374436	0.341031	0.356134	0.341275	0.341031	0.341031	0.614489	0.546917	0
2030	3100	0.720798	0.585162	0.341031	0.341903	0.470063	0.341031	0.341903	0.341903	0.341903	0.341903	0.808583	0.583276	0.58132	0	0.524684	0.355699	0.414492	0.374436	0.341031	0.356134	0.341275	0.341031	0.341031	0.614489	0.546917	0
2030	3120	0.720798	0.585162	0.341031	0.341903	0.470063	0.341031	0.341903	0.341903	0.341903	0.341903	0.808583	0.583276	0.58132	0	0.524684	0.355699	0.414492	0.374436	0.341031	0.356134	0.341275	0.341031	0.341031	0.614489	0.546917	0
2030	3140	0.720798	0.585162	0.341031	0.341903	0.470063	0.341031	0.341903	0.341903	0.341903	0.341903	0.808583	0.583276	0.58132	0	0.524684	0.355699	0.414492	0.374436	0.341031	0.356134	0.341275	0.341031	0.341031	0.614489	0.546917	0
2030	3160	0.720798	0.585162	0.341031	0.341903	0.470063	0.341031	0.341903	0.341903	0.341903	0.341903	0.808583	0.583276	0.58132	0	0.524684	0.355699	0.414492	0.374436	0.341031	0.356134	0.341275	0.341031	0.341031	0.614489	0.546917	0
2030	3180	0.720798	0.585162	0.341031	0.341903	0.470063	0.341031	0.341903	0.341903	0.341903	0.341903	0.808583	0.583276	0.58132	0	0.524684	0.355699	0.414492	0.374436	0.341031	0.356134	0.341275	0.341031	0.341031	0.614489	0.546917	0
2030	3200	0.720798	0.585162	0.341031	0.341903	0.470063	0.341031	0.341903	0.341903	0.341903	0.341903	0.808583	0.583276	0.58132	0	0.524684	0.355699	0.414492	0.374436	0.341031	0.356134	0.341275	0.341031	0.341031	0.614489	0.546917	0
2030	3220	0.720798	0.585162	0.341031	0.341903	0.470063	0.341031	0.341903	0.341903	0.341903	0.341903	0.808583	0.583276	0.58132	0	0.524684	0.355699	0.414492	0.374436	0.341031	0.356134	0.341275	0.341031	0.341031	0.614489	0.546917	0
2030	3240	0.720798	0.585162	0.341031	0.341903	0.470063	0.341031	0.341903	0.341903	0.341903	0.341903	0.808583	0.583276	0.58132	0	0.524684	0.355699	0.414492	0.374436	0.341031	0.356134	0.341275	0.341031	0.341031	0.614489	0.546917	0
2030	3260	0.720798	0.585162	0.341031	0.341903	0.470063	0.341031	0.341903	0.341903	0.341903	0.341903	0.808583	0.583276	0.58132	0	0.524684	0.355699	0.414492	0.374436	0.341031	0.356134	0.341275	0.341031	0.341031	0.614489	0.546917	0
2030	3280	0.720798	0.585162	0.341031	0.341903	0.470063	0.341031	0.341903	0.341903	0.341903	0.341903	0.808583	0.583276	0.58132	0	0.524684	0.355699	0.414492	0.374436	0.341031	0.356134	0.341275	0.341031	0.341031	0.614489	0.546917	0
2030	3300	0.720798	0.585162	0.341031	0.341903	0.470063	0.341031	0.341903	0.341903	0.341903	0.341903	0.808583	0.583276	0.58132	0	0.524684	0.355699	0.414492	0.374436	0.341031	0.356134	0.341275	0.341031	0.341031	0.614489	0.546917	0
2030	3320	0.720798	0.585162	0.341031	0.341903	0.470063	0.341031	0.341903	0.341903	0.341903	0.341903	0.808583	0.583276	0.58132	0	0.524684	0.355699	0.414492	0.374436	0.341031	0.356134	0.341275	0.341031	0.341031	0.614489	0.546917	0
2030	3340	0.720798	0.585162	0.341031	0.341903	0.470063	0.341031	0.341903	0.341903	0.341903	0.341903	0.808583	0.583276	0.58132	0	0.524684	0.355699	0.414492	0.374436	0.341031	0.356134	0.341275	0.341031	0.341031	0.614489	0.546917	0
2030	3360	0.720798	0.585162	0.341031	0.341903	0.470063	0.341031	0.341903	0.341903	0.341903	0.341903	0.808583	0.583276	0.58132	0	0.524684	0.355699	0.414492	0.374436	0.341031	0.356134	0.341275	0.341031	0.341031	0.614489	0.546917	0
2030	3380	0.720798	0.585162	0.341031	0.341903	0.470063	0.341031	0.341903	0.341903	0.341903	0.341903	0.808583	0.583276	0.58132	0	0.524684	0.355699	0.414492	0.374436	0.341031	0.356134	0.341275	0.341031	0.341031	0.614489	0.546917	0
2030	3400	0.720798	0.585162	0.341031	0.341903	0.470063	0.341031	0.341903	0.341903	0.341903	0.341903	0.808583	0.583276	0.58132	0	0.524684	0.355699	0.414492	0.374436	0.341031	0.356134	0.341275	0.341031	0.341031	0.614489	0.546917	0
2030	3420	0.720798	0.585162	0.341031	0.341903	0.470063	0.341031	0.341903	0.341903	0.341903	0.341903	0.808583	0.583276	0.58132	0	0.524684	0.355699	0.414492	0.374436	0.341031	0.356134	0.341275	0.341031	0.341031	0.614489	0.546917	0
2030	3440	0.720798	0.585162	0.341031	0.341903	0.470063	0.341031	0.341903	0.341903	0.341903	0.341903	0.808583	0.583276	0.58132	0	0.524684	0.355699	0.414492	0.374436	0.341031	0.356134	0.341275	0.341031	0.341031	0.614489	0.546917	0
2030	3460	0.720798	0.585162	0.341031	0.341903	0.470063	0.341031	0.341903	0.341903	0.341903	0.341903	0.808583	0.583276	0.58132	0	0.524684	0.355699	0.414492	0.374436	0.341031	0.356134	0.341275	0.341031	0.341031	0.614489	0.546917	0
2030	3480	0.720798	0.585162	0.341031	0.341903	0.470063	0.341031	0.341903	0.341903	0.341903	0.341903	0.808583	0.583276	0.58132	0	0.524684	0.355699	0.414492	0.374436	0.341031	0.356134	0.341275	0.341031	0.341031	0.614489	0.546917	0
2030	3500	0.720798	0.585162	0.341031	0.341903	0.470063	0.341031	0.341903	0.341903	0.341903	0.341903	0.808583	0.583276	0.58132	0	0.524684	0.355699	0.414492	0.374436	0.341031	0.356134	0.341275	0.341031	0.341031	0.614489	0.546917	0
2030	3520	0.720798	0.585162	0.341031	0.341903	0.470063	0.341031	0.341903	0.341903	0.341903	0.341903	0.808583	0.583276	0.58132	0	0.524684	0.355699	0.414492	0.374436	0.341031	0.356134	0.341275	0.341031	0.341031	0.614489	0.546917	0
2030	3540	0.720798	0.585162	0.341031	0.341903	0.470063	0.341031	0.341903	0.341903	0.341903	0.341903	0.808583	0.583276	0.58132	0	0.524684	0.355699	0.414492	0.374436	0.341031	0.356134	0.341275	0.341031	0.341031	0.614489	0.546917	0.453501
2030	3560	0.720798	0.585162	0.341031	0.341903	0.470063	0.341031	0.341903	0.341903	0.341903	0.341903	0.808583	0.583276	0.58132	0	0.524684	0.355699	0.414492	0.374436	0.341031	0.356134	0.341275	0.341031	0.341031	0.614489	0.546917	0.453501
2030	3580	0.720798	0.585162	0.341031	0.341903	0.470063	0.341031	0.341903	0.341903	0.341903	0.341903	0.808583	0.583276	0.58132	0	0.524684	0.355699	0.414492	0.374436	0.341031	0.356134	0.341275	0.341031	0.341031	0.614489	0.546917	0.453501
2030	3600	0.720798	0.585162	0.341031	0.341903	0.470063	0.341031	0.341903	0.341903	0.341903	0.341903	0.808583	0.583276	0.58132	0	0.524684	0.355699	0.414492	0.374436	0.341031	0.356134	0.341275	0.341031	0.341031	0.614489	0.546917	0.453501
2030	3620	0.720798	0.585162	0.341031	0.341903	0.470063	0.341031	0.341903	0.341903	0.341903	0.341903	0.808583	0.583276	0.58132	0	0.524684	0.355699	0.414492	0.374436	0.341031	0.356134	0.341275	0.341031	0.341031	0.614489	0.546917	0.453501
2030	3640	0.720798	0.585162	0.341031	0.341903	0.470063	0.341031	0.341903	0.341903	0.341903	0.341903	0.808583	0.583276	0.58132	0	0.524684	0.355699	0.414492	0.374436	0.341031	0.356134	0.341275	0.341031	0.341031	0.614489	0.546917	0.453501
2030	3660	0.720798	0.585162	0.341031	0.341903	0.470063	0.341031	0.341903	0.341903	0.341903	0.341903	0.808583	0.583276	0.58132	0	0.524684	0.355699	0.414492	0.374436	0.341031	0.356134	0.341275	0.341031	0.341031	0.614489	0.546917	0.453501
2030	3680	0.720798	0.585162	0.341031	0.341903	0.470063	0.341031	0.341903	0.341903	0.341903	0.341903	0.808583	0.583276	0.58132	0	0.524684	0.355699	0.414492	0.374436	0.341031	0.356134	0.341275	0.341031	0.341031	0.614489	0.546917	0.453501
2030	3700	0.720798	0.585162	0.341031	0.341903	0.470063	0.341031	0.341903	0.341903	0.341903	0.341903	0.808583	0.583276	0.58132	0	0.524684	0.355699	0.414492	0.374436	0.341031	0.356134	0.341275	0.341031	0.341031	0.614489	0.546917	0.453501
2030	3720	0.720798	0.585162	0.341031	0.341903	0.470063	0.341031	0.341903	0.341903	0.341903	0.341903	0.808583	0.583276	0.58132	0	0.524684	0.355699	0.414492	0.374436	0.341031	0.356134	0.341275	0.341031	0.341031	0.614489	0.546917	0.453501
2030	3740	0.720798	0.585162	0.341031	0.341903	0.470063	0.341031	0.341903	0.341903	0.341903	0.341903	0.808583	0.583276	0.58132	0	0.524684	0.355699	0.414492	0.374436	0.341031	0.356134	0.341275	0.341031	0.341031	0.614489	0.546917	0.453501
2030	3760	0.720798	0.585162	0.341031	0.341903	0.470063	0.341031	0.341903	0.341903	0.341903	0.341903	0.808583	0.583276	0.58132	0	0.524684	0.355699	0.414492	0.374436	0.341031	0.356134	0.341275	0.341031	0.341031	0.614489	0.546917	0.453501
2030	3780	0.720798	0.585162	0.341031	0.341903	0.470063	0.341031	0.341903	0.341903	0.341903	0.341903	0.808583	0.583276	0.58132	0	0.524684	0.355699	0.414492	0.374436	0.341031	0.356134	0.341275	0.341031	0.341031	0.614489	0.546917	0.453501
2030	3800	0.720798	0.585162	0.341031	0.341903	0.470063	0.341031	0.341903	0.341903	0.341903	0.341903	0.808583	0.583276	0.58132	0	0.524684	0.355699	0.414492	0.374436	0.341031	0.356134	0.341275	0.341031	0.341031	0.614489	0.546917	0.453501
2030	3820	0.720798	0.585162	0.341031	0.341903	0.470063	0.341031	0.341903	0.341903	0.341903	0.341903	0.808583	0.583276	0.58132	0	0.524684	0.355699	0.414492	0.374436	0.341031	0.356134	0.341275	0.341031	0.341031	0.614489	0.546917	0.453501
2030	3840	0.720798	0.585162	0.341031	0.341903	0.470063	0.341031	0.341903	0.341903	0.341903	0.341903	0.808583	0.583276	0.58132	0	0.524684	0.355699	0.414492	0.374436	0.341031	0.356134	0.341275	0.341031	0.341031	0.614489	0.546917	0.453501
2030	3860	0.720798	0.585162	0.341031	0.341903	0.470063	0.341031	0.341903	0.341903	0.341903	0.341903	0.808583	0.583276	0.58132	0	0.524684	0.355699	0.414492	0.374436	0.341031	0.356134	0.341275	0.341031	0.341031	0.614489	0.546917	0.453501
2030	3880	0.720798	0.585162	0.341031	0.341903	0.470063	0.341031	0.341903	0.341903	0.341903	0.341903	0.808583	0.583276	0.58132	0	0.524684	0.355699	0.414492	0.374436	0.341031	0.356134	0.341275	0.341031	0.341031	0.614489	0.546917	0.453501
2030	3900	0.720798	0.585162	0.341031	0.341903	0.470063	0.341031	0.341903	0.341903	0.341903	0.341903	0.808583	0.583276	0.58132	0	0.524684	0.355699	0.414492	0.374436	0.341031	0.356134	0.341275	0.341031	0.341031	0.614489	0.546917	0.453501
2030	3920	0.720798	0.585162	0.341031	0.341903	0.470063	0.341031	0.341903	0.341903	0.341903	0.341903	0.808583	0.583276	0.58132	0	0.524684	0.355699	0.414492	0.374436	0.341031	0.356134	0.341275	0.341031	0.341031	0.614489	0.546917	0.453501
2030	3940	0.720798	0.585162	0.341031	0.341903	0.470063	0.341031	0.341903	0.341903	0.341903	0.341903	0.808583	0.583276	0.58132	0	0.524684	0.355699	0.414492	0.374436	0.341031	0.356134	0.341275	0.341031	0.341031	0.614489	0.546917	0.453501
2030	3960	0.720798	0.585162	0.341031	0.341903	0.470063	0.341031	0.341903	0.341903	0.341903	0.341903	0.808583	0.583276	0.58132	0	0.524684	0.355699	0.414492	0.374436	0.341031	0.356134	0.341275	0.341031	0.341031	0.614489	0.546917	0.453501
2030	3980	0.720798	0.585162	0.341031	0.341903	0.470063	0.341031	0.341903	0.341903	0.341903	0.341903	0.808583	0.583276	0.58132	0	0.524684	0.355699	0.414492	0.374436	0.341031	0.356134	0.341275	0.341031	0.341031	0.614489	0.546917	0.453501
2030	4000	0.720798	0.585162	0.341031	0.341903	0.470063	0.341031	0.341903	0.341903	0.341903	0.341903	0.808583	0.583276	0.58132	0	0.524684	0.355699	0.414492	0.374436	0.341031	0.356134	0.341275	0.341031	0.341031	0.614489	0.546917	0.453501
2050	0	0	0	0	0	0	0	0	0	0	0	0	0	0	0	0	0	0	0	0	0	0	0	0	0	0	0
2050	20	0.756525	0.581758	0	0	0	0	0	0	0	0	0.353168	0.0757727	0	0	0.26827	0.210658	0	0	0	0	0	0	0	0.637126	0	0
2050	40	0.822916	0.581758	0.244843	0.245433	0.326064	0.242805	0.245433	0.245433	0.245433	0.245433	0.595383	0.475905	0.568134	0	0.268451	0.294912	0.224967	0	0.244843	0.200164	0.245027	0.244843	0.244843	0.637126	0.368097	0
2050	60	0.822916	0.581758	0.244843	0.245433	0.326064	0.242805	0.245433	0.245433	0.245433	0.245433	0.595383	0.686642	0.568134	0	0.282225	0.294935	0.308302	0.0130363	0.244843	0.200164	0.245027	0.244843	0.244843	0.637126	0.368097	0
2050	80	0.822916	0.581758	0.244843	0.2455	0.347268	0.250716	0.2455	0.2455	0.2455	0.2455	0.595383	0.742278	0.568134	0	0.390538	0.319894	0.308302	0.0130363	0.244843	0.28363	0.273126	0.244843	0.244843	0.659208	0.631215	0
2050	100	0.822916	0.581758	0.244843	0.2455	0.347268	0.250716	0.2455	0.2455	0.2455	0.2455	0.595383	0.871429	0.568134	0	0.390877	0.319894	0.308302	0.0130363	0.244843	0.28363	0.273126	0.244843	0.244843	0.817412	0.631215	0
2050	120	0.822916	0.581758	0.244843	0.2455	0.347268	0.250716	0.2455	0.2455	0.2455	0.2455	0.612602	0.871429	0.568134	0	0.390877	0.319894	0.308302	0.0130363	0.244843	0.28363	0.273126	0.244843	0.244843	0.817412	0.631215	0
2050	140	0.822916	0.780215	0.244843	0.2455	0.347268	0.250716	0.2455	0.2455	0.2455	0.2455	0.749872	0.871429	0.783882	0	0.390877	0.319894	0.308302	0.0130363	0.244843	0.28363	0.273126	0.244843	0.244843	0.817412	0.631215	0
2050	160	0.822916	0.780215	0.244843	0.2455	0.347268	0.250716	0.2455	0.2455	0.2455	0.2455	0.749872	0.871429	0.783882	0	0.390877	0.319894	0.308302	0.0130363	0.244843	0.28363	0.273126	0.244843	0.244843	0.817412	0.631215	0
2050	180	0.822916	0.780215	0.244843	0.2455	0.347268	0.250954	0.2455	0.2455	0.2455	0.2455	0.749872	0.886029	0.783882	0	0.390877	0.319894	0.308302	0.0130363	0.454708	0.28363	0.282358	0.244843	0.244843	0.819319	0.631215	0
2050	200	0.822916	0.780215	0.244843	0.2455	0.347268	0.250954	0.2455	0.2455	0.2455	0.2455	0.749872	0.886029	0.783882	0	0.69873	0.319894	0.308302	0.0130363	0.454708	0.28363	0.282358	0.244843	0.244843	0.819319	0.631215	0
2050	220	0.822916	0.780215	0.454708	0.2455	0.626751	0.454708	0.2455	0.2455	0.2455	0.2455	0.749872	0.886029	0.783882	0	0.69873	0.319894	0.308302	0.0130363	0.454708	0.28363	0.455034	0.454708	0.454708	0.819319	0.786616	0
2050	240	0.822916	0.780215	0.454708	0.455871	0.626751	0.454708	0.455871	0.455871	0.455871	0.455871	0.804648	0.886029	0.783882	0	0.699579	0.474265	0.558307	0.0130363	0.454708	0.475272	0.455034	0.454708	0.454708	0.819319	0.786616	0
2050	260	0.822916	0.780215	0.454708	0.455871	0.626751	0.454708	0.455871	0.455871	0.455871	0.455871	0.804648	0.886029	0.783882	0	0.699579	0.474265	0.558307	0.0130363	0.454708	0.475272	0.455034	0.454708	0.454708	0.819319	0.786616	0
2050	280	0.822916	0.780215	0.454708	0.455871	0.626751	0.454708	0.455871	0.455871	0.455871	0.455871	0.804648	0.886029	0.783882	0	0.699579	0.474265	0.558307	0.0130363	0.454708	0.475272	0.455034	0.454708	0.454708	0.819319	0.786616	0
2050	300	0.822916	0.780215	0.454708	0.455871	0.626751	0.454708	0.455871	0.455871	0.455871	0.455871	0.804648	0.886029	0.783882	0	0.699579	0.474265	0.558307	0.0130363	0.454708	0.475272	0.455034	0.454708	0.454708	0.819319	0.786616	0
2050	320	0.822916	0.780215	0.454708	0.455871	0.626751	0.454708	0.455871	0.455871	0.455871	0.455871	0.969636	0.886029	0.783882	0	0.699579	0.474265	0.558307	0.0130363	0.454708	0.475272	0.455034	0.454708	0.454708	0.819319	0.786616	0
2050	340	0.822916	0.780215	0.454708	0.455871	0.626751	0.454708	0.455871	0.455871	0.455871	0.455871	0.969636	0.886029	0.783882	0	0.699579	0.474265	0.558307	0.0130363	0.454708	0.475272	0.455034	0.454708	0.454708	0.819319	0.786616	0
2050	360	0.822916	0.780215	0.454708	0.455871	0.626751	0.454708	0.455871	0.455871	0.455871	0.455871	0.969636	0.886029	0.783882	0	0.699579	0.474265	0.558307	0.0130363	0.454708	0.475272	0.455034	0.454708	0.454708	0.819319	0.786616	0
2050	380	0.822916	0.780215	0.454708	0.455871	0.626751	0.454708	0.455871	0.455871	0.455871	0.455871	0.969636	0.886029	0.783882	0	0.699579	0.474265	0.558307	0.0130363	0.454708	0.475272	0.455034	0.454708	0.454708	0.819319	0.786616	0
2050	400	0.822916	0.780215	0.454708	0.455871	0.626751	0.454708	0.455871	0.455871	0.455871	0.455871	0.969636	0.886029	0.783882	0	0.699579	0.474265	0.558307	0.0130363	0.454708	0.475272	0.455034	0.454708	0.454708	0.819319	0.786616	0
2050	420	0.822916	0.780215	0.454708	0.455871	0.626751	0.454708	0.455871	0.455871	0.455871	0.455871	0.969636	0.886029	0.783882	0	0.699579	0.474265	0.558307	0.0130363	0.454708	0.475272	0.455034	0.454708	0.454708	0.819319	0.786616	0
2050	440	0.822916	0.780215	0.454708	0.455871	0.626751	0.454708	0.455871	0.455871	0.455871	0.455871	0.969636	0.886029	0.783882	0	0.699579	0.474265	0.558307	0.0130363	0.454708	0.475272	0.455034	0.454708	0.454708	0.819319	0.786616	0
2050	460	0.822916	0.780215	0.454708	0.455871	0.626751	0.454708	0.455871	0.455871	0.455871	0.455871	0.969636	0.886029	0.783882	0	0.699579	0.474265	0.558307	0.0130363	0.454708	0.475272	0.455034	0.454708	0.454708	0.819319	0.786616	0
2050	480	0.822916	0.780215	0.454708	0.455871	0.626751	0.454708	0.455871	0.455871	0.455871	0.455871	0.969636	0.886029	0.783882	0	0.699579	0.474265	0.558307	0.0130363	0.454708	0.475272	0.455034	0.454708	0.454708	0.819319	0.786616	0
2050	500	0.822916	0.780215	0.454708	0.455871	0.626751	0.454708	0.455871	0.455871	0.455871	0.455871	0.969636	0.886029	0.783882	0	0.699579	0.474265	0.558307	0.0130363	0.454708	0.475272	0.455034	0.454708	0.454708	0.819319	0.786616	0
2050	520	0.822916	0.780215	0.454708	0.455871	0.626751	0.454708	0.455871	0.455871	0.455871	0.455871	0.969636	0.886029	0.783882	0	0.699579	0.474265	0.558307	0.0130363	0.454708	0.475272	0.455034	0.454708	0.454708	0.819319	0.786616	0
2050	540	0.822916	0.780215	0.454708	0.455871	0.626751	0.454708	0.455871	0.455871	0.455871	0.455871	0.969636	0.886029	0.783882	0	0.699579	0.474265	0.558307	0.0130363	0.454708	0.475272	0.455034	0.454708	0.454708	0.819319	0.786616	0
2050	560	0.822916	0.780215	0.454708	0.455871	0.626751	0.454708	0.455871	0.455871	0.455871	0.455871	0.969636	0.886029	0.783882	0	0.699579	0.474265	0.558307	0.0130363	0.454708	0.475272	0.455034	0.454708	0.454708	0.819319	0.786616	0
2050	580	0.822916	0.780215	0.454708	0.455871	0.626751	0.454708	0.455871	0.455871	0.455871	0.455871	0.969636	0.886029	0.783882	0	0.699579	0.474265	0.558307	0.0130363	0.454708	0.475272	0.455034	0.454708	0.454708	0.819319	0.786616	0
2050	600	0.822916	0.780215	0.454708	0.455871	0.626751	0.454708	0.455871	0.455871	0.455871	0.455871	0.969636	0.886029	0.783882	0	0.699579	0.474265	0.558307	0.0130363	0.454708	0.475272	0.455034	0.454708	0.454708	0.819319	0.786616	0
2050	620	0.822916	0.780215	0.454708	0.455871	0.626751	0.454708	0.455871	0.455871	0.455871	0.455871	0.969636	0.886029	0.783882	0	0.699579	0.474265	0.558307	0.0130363	0.454708	0.475272	0.455034	0.454708	0.454708	0.819319	0.786616	0
2050	640	0.822916	0.780215	0.454708	0.455871	0.626751	0.454708	0.455871	0.455871	0.455871	0.455871	0.969636	0.886029	0.783882	0	0.699579	0.474265	0.558307	0.0130363	0.454708	0.475272	0.455034	0.454708	0.454708	0.819319	0.786616	0
2050	660	0.822916	0.780215	0.454708	0.455871	0.626751	0.454708	0.455871	0.455871	0.455871	0.455871	0.969636	0.886029	0.783882	0	0.699579	0.474265	0.558307	0.0130363	0.454708	0.475272	0.455034	0.454708	0.454708	0.819319	0.786616	0
2050	680	0.822916	0.780215	0.454708	0.455871	0.626751	0.454708	0.455871	0.455871	0.455871	0.455871	0.969636	0.886029	0.783882	0	0.699579	0.474265	0.558307	0.0130363	0.454708	0.475272	0.455034	0.454708	0.454708	0.819319	0.786616	0
2050	700	0.822916	0.780215	0.454708	0.455871	0.626751	0.454708	0.455871	0.455871	0.455871	0.455871	0.969636	0.886029	0.783882	0	0.699579	0.474265	0.558307	0.499248	0.454708	0.475272	0.455034	0.454708	0.454708	0.819319	0.786616	0
2050	720	0.822916	0.780215	0.454708	0.455871	0.626751	0.454708	0.455871	0.455871	0.455871	0.455871	0.969636	0.886029	0.783882	0	0.699579	0.474265	0.558307	0.499248	0.454708	0.475272	0.455034	0.454708	0.454708	0.819319	0.786616	0
2050	740	0.822916	0.780215	0.454708	0.455871	0.626751	0.454708	0.455871	0.455871	0.455871	0.455871	0.969636	0.886029	0.783882	0	0.699579	0.474265	0.558307	0.499248	0.454708	0.475272	0.455034	0.454708	0.454708	0.819319	0.786616	0
2050	760	0.822916	0.780215	0.454708	0.455871	0.626751	0.454708	0.455871	0.455871	0.455871	0.455871	0.969636	0.886029	0.783882	0	0.699579	0.474265	0.558307	0.499248	0.454708	0.475272	0.455034	0.454708	0.454708	0.819319	0.786616	0
2050	780	0.822916	0.780215	0.454708	0.455871	0.626751	0.454708	0.455871	0.455871	0.455871	0.455871	0.969636	0.886029	0.783882	0	0.699579	0.474265	0.558307	0.499248	0.454708	0.475272	0.455034	0.454708	0.454708	0.819319	0.786616	0
2050	800	0.822916	0.780215	0.454708	0.455871	0.626751	0.454708	0.455871	0.455871	0.455871	0.455871	0.969636	0.886029	0.783882	0	0.699579	0.474265	0.558307	0.499248	0.454708	0.475272	0.455034	0.454708	0.454708	0.819319	0.786616	0
2050	820	0.961064	0.780215	0.454708	0.455871	0.626751	0.454708	0.455871	0.455871	0.455871	0.455871	0.969636	0.886029	0.783882	0	0.699579	0.474265	0.558307	0.499248	0.454708	0.475272	0.455034	0.454708	0.454708	0.819319	0.786616	0
2050	840	0.961064	0.780215	0.454708	0.455871	0.626751	0.454708	0.455871	0.455871	0.455871	0.455871	0.969636	0.886029	0.783882	0	0.699579	0.474265	0.558307	0.499248	0.454708	0.475272	0.455034	0.454708	0.454708	0.819319	0.786616	0
2050	860	0.961064	0.780215	0.454708	0.455871	0.626751	0.454708	0.455871	0.455871	0.455871	0.455871	0.969636	0.886029	0.783882	0	0.699579	0.474265	0.558307	0.499248	0.454708	0.475272	0.455034	0.454708	0.454708	0.819319	0.786616	0
2050	880	0.961064	0.780215	0.454708	0.455871	0.626751	0.454708	0.455871	0.455871	0.455871	0.455871	0.969636	0.886029	0.783882	0	0.699579	0.474265	0.558307	0.499248	0.454708	0.475272	0.455034	0.454708	0.454708	0.819319	0.786616	0
2050	900	0.961064	0.780215	0.454708	0.455871	0.626751	0.454708	0.455871	0.455871	0.455871	0.455871	0.969636	0.886029	0.783882	0	0.699579	0.474265	0.558307	0.499248	0.454708	0.475272	0.455034	0.454708	0.454708	0.819319	0.786616	0
2050	920	0.961064	0.780215	0.454708	0.455871	0.626751	0.454708	0.455871	0.455871	0.455871	0.455871	0.969636	0.886029	0.783882	0	0.699579	0.474265	0.558307	0.499248	0.454708	0.475272	0.455034	0.454708	0.454708	0.819319	0.786616	0
2050	940	0.961064	0.780215	0.454708	0.455871	0.626751	0.454708	0.455871	0.455871	0.455871	0.455871	0.969636	0.886029	0.783882	0	0.699579	0.474265	0.558307	0.499248	0.454708	0.475272	0.455034	0.454708	0.454708	0.819319	0.786616	0
2050	960	0.961064	0.780215	0.454708	0.455871	0.626751	0.454708	0.455871	0.455871	0.455871	0.455871	0.969636	0.886029	0.783882	0	0.699579	0.474265	0.558307	0.499248	0.454708	0.475272	0.455034	0.454708	0.454708	0.819319	0.786616	0
2050	980	0.961064	0.780215	0.454708	0.455871	0.626751	0.454708	0.455871	0.455871	0.455871	0.455871	0.969636	0.886029	0.783882	0	0.699579	0.474265	0.558307	0.499248	0.454708	0.475272	0.455034	0.454708	0.454708	0.819319	0.786616	0
2050	1000	0.961064	0.780215	0.454708	0.455871	0.626751	0.454708	0.455871	0.455871	0.455871	0.455871	0.969636	0.886029	0.783882	0	0.699579	0.474265	0.558307	0.499248	0.454708	0.475272	0.455034	0.454708	0.454708	0.819319	0.786616	0
2050	1020	0.961064	0.780215	0.454708	0.455871	0.626751	0.454708	0.455871	0.455871	0.455871	0.455871	0.969636	0.886029	0.783882	0	0.699579	0.474265	0.558307	0.499248	0.454708	0.475272	0.455034	0.454708	0.454708	0.819319	0.786616	0
2050	1040	0.961064	0.780215	0.454708	0.455871	0.626751	0.454708	0.455871	0.455871	0.455871	0.455871	0.969636	0.886029	0.783882	0	0.699579	0.474265	0.558307	0.499248	0.454708	0.475272	0.455034	0.454708	0.454708	0.819319	0.786616	0
2050	1060	0.961064	0.780215	0.454708	0.455871	0.626751	0.454708	0.455871	0.455871	0.455871	0.455871	0.969636	0.886029	0.783882	0	0.699579	0.474265	0.558307	0.499248	0.454708	0.475272	0.455034	0.454708	0.454708	0.819319	0.786616	0
2050	1080	0.961064	0.780215	0.454708	0.455871	0.626751	0.454708	0.455871	0.455871	0.455871	0.455871	0.969636	0.886029	0.783882	0	0.699579	0.474265	0.558307	0.499248	0.454708	0.475272	0.455034	0.454708	0.454708	0.819319	0.786616	0
2050	1100	0.961064	0.780215	0.454708	0.455871	0.626751	0.454708	0.455871	0.455871	0.455871	0.455871	0.969636	0.886029	0.783882	0	0.699579	0.474265	0.558307	0.499248	0.454708	0.475272	0.455034	0.454708	0.454708	0.819319	0.786616	0
2050	1120	0.961064	0.780215	0.454708	0.455871	0.626751	0.454708	0.455871	0.455871	0.455871	0.455871	0.969636	0.886029	0.783882	0	0.699579	0.474265	0.558307	0.499248	0.454708	0.475272	0.455034	0.454708	0.454708	0.819319	0.786616	0
2050	1140	0.961064	0.780215	0.454708	0.455871	0.626751	0.454708	0.455871	0.455871	0.455871	0.455871	0.969636	0.886029	0.783882	0	0.699579	0.474265	0.558307	0.499248	0.454708	0.475272	0.455034	0.454708	0.454708	0.819319	0.786616	0
2050	1160	0.961064	0.780215	0.454708	0.455871	0.626751	0.454708	0.455871	0.455871	0.455871	0.455871	0.969636	0.886029	0.783882	0	0.699579	0.474265	0.558307	0.499248	0.454708	0.475272	0.455034	0.454708	0.454708	0.819319	0.786616	0
2050	1180	0.961064	0.780215	0.454708	0.455871	0.626751	0.454708	0.455871	0.455871	0.455871	0.455871	0.969636	0.886029	0.783882	0	0.699579	0.474265	0.558307	0.499248	0.454708	0.475272	0.455034	0.454708	0.454708	0.819319	0.786616	0
2050	1200	0.961064	0.780215	0.454708	0.455871	0.626751	0.454708	0.455871	0.455871	0.455871	0.455871	0.982323	0.886029	0.783882	0	0.699579	0.474265	0.558307	0.499248	0.454708	0.475272	0.455034	0.454708	0.454708	0.819319	0.786616	0
2050	1220	0.961064	0.780215	0.454708	0.455871	0.626751	0.454708	0.455871	0.455871	0.455871	0.455871	0.982323	0.886029	0.783882	0	0.699579	0.474265	0.558307	0.499248	0.454708	0.475272	0.455034	0.454708	0.454708	0.819319	0.786616	0
2050	1240	0.961064	0.780215	0.454708	0.455871	0.626751	0.454708	0.455871	0.455871	0.455871	0.455871	0.982323	0.886029	0.783882	0	0.699579	0.474265	0.558307	0.499248	0.454708	0.475272	0.455034	0.454708	0.454708	0.819319	0.786616	0
2050	1260	0.961064	0.780215	0.454708	0.455871	0.626751	0.454708	0.455871	0.455871	0.455871	0.455871	0.982323	0.886029	0.783882	0	0.699579	0.474265	0.558307	0.499248	0.454708	0.475272	0.455034	0.454708	0.454708	0.819319	0.786616	0
2050	1280	0.961064	0.780215	0.454708	0.455871	0.626751	0.454708	0.455871	0.455871	0.455871	0.455871	0.982323	0.886029	0.783882	0	0.699579	0.474265	0.558307	0.499248	0.454708	0.475272	0.455034	0.454708	0.454708	0.819319	0.786616	0
2050	1300	0.961064	0.780215	0.454708	0.455871	0.626751	0.454708	0.455871	0.455871	0.455871	0.455871	0.982323	0.886029	0.783882	0	0.699579	0.474265	0.558307	0.499248	0.454708	0.475272	0.455034	0.454708	0.454708	0.819319	0.786616	0
2050	1320	0.961064	0.780215	0.454708	0.455871	0.626751	0.454708	0.455871	0.455871	0.455871	0.455871	0.982323	0.886029	0.783882	0	0.699579	0.474265	0.558307	0.499248	0.454708	0.475272	0.455034	0.454708	0.454708	0.819319	0.786616	0
2050	1340	0.961064	0.780215	0.454708	0.455871	0.626751	0.454708	0.455871	0.455871	0.455871	0.455871	0.982323	0.886029	0.783882	0	0.699579	0.474265	0.558307	0.499248	0.454708	0.475272	0.455034	0.454708	0.454708	0.819319	0.786616	0
2050	1360	0.961064	0.780215	0.454708	0.455871	0.626751	0.454708	0.455871	0.455871	0.455871	0.455871	0.982323	0.886029	0.783882	0	0.699579	0.474265	0.558307	0.499248	0.454708	0.475272	0.455034	0.454708	0.454708	0.819319	0.786616	0
2050	1380	0.961064	0.780215	0.454708	0.455871	0.626751	0.454708	0.455871	0.455871	0.455871	0.455871	0.982323	0.886029	0.783882	0	0.699579	0.474265	0.558307	0.499248	0.454708	0.475272	0.455034	0.454708	0.454708	0.819319	0.786616	0
2050	1400	0.961064	0.780215	0.454708	0.455871	0.626751	0.454708	0.455871	0.455871	0.455871	0.455871	0.982323	0.886029	0.783882	0	0.699579	0.474265	0.558307	0.499248	0.454708	0.475272	0.455034	0.454708	0.454708	0.819319	0.786616	0
2050	1420	0.961064	0.780215	0.454708	0.455871	0.626751	0.454708	0.455871	0.455871	0.455871	0.455871	0.982323	0.886029	0.783882	0	0.699579	0.474265	0.558307	0.499248	0.454708	0.475272	0.455034	0.454708	0.454708	0.819319	0.786616	0
2050	1440	0.961064	0.780215	0.454708	0.455871	0.626751	0.454708	0.455871	0.455871	0.455871	0.455871	0.982323	0.886029	0.783882	0	0.699579	0.474265	0.558307	0.499248	0.454708	0.475272	0.455034	0.454708	0.454708	0.819319	0.786616	0
2050	1460	0.961064	0.780215	0.454708	0.455871	0.626751	0.454708	0.455871	0.455871	0.455871	0.455871	0.982323	0.886029	0.783882	0	0.699579	0.474265	0.558307	0.499248	0.454708	0.475272	0.455034	0.454708	0.454708	0.819319	0.786616	0
2050	1480	0.961064	0.780215	0.454708	0.455871	0.626751	0.454708	0.455871	0.455871	0.455871	0.455871	0.982323	0.886029	0.783882	0	0.699579	0.474265	0.558307	0.499248	0.454708	0.475272	0.455034	0.454708	0.454708	0.819319	0.786616	0
2050	1500	0.961064	0.780215	0.454708	0.455871	0.626751	0.454708	0.455871	0.455871	0.455871	0.455871	0.982323	0.886029	0.783882	0	0.699579	0.474265	0.558307	0.499248	0.454708	0.475272	0.455034	0.454708	0.454708	0.819319	0.786616	0
2050	1520	0.961064	0.780215	0.454708	0.455871	0.626751	0.454708	0.455871	0.455871	0.455871	0.455871	0.982323	0.886029	0.783882	0	0.699579	0.474265	0.558307	0.499248	0.454708	0.475272	0.455034	0.454708	0.454708	0.819319	0.786616	0
2050	1540	0.961064	0.780215	0.454708	0.455871	0.626751	0.454708	0.455871	0.455871	0.455871	0.455871	0.982323	0.886029	0.783882	0	0.699579	0.474265	0.558307	0.499248	0.454708	0.475272	0.455034	0.454708	0.454708	0.819319	0.786616	0
2050	1560	0.961064	0.780215	0.454708	0.455871	0.626751	0.454708	0.455871	0.455871	0.455871	0.455871	0.982323	0.886029	0.783882	0	0.699579	0.474265	0.558307	0.499248	0.454708	0.475272	0.455034	0.454708	0.454708	0.819319	0.786616	0
2050	1580	0.961064	0.780215	0.454708	0.455871	0.626751	0.454708	0.455871	0.455871	0.455871	0.455871	0.982323	0.886029	0.783882	0	0.699579	0.474265	0.558307	0.499248	0.454708	0.475272	0.455034	0.454708	0.454708	0.819319	0.786616	0
2050	1600	0.961064	0.780215	0.454708	0.455871	0.626751	0.454708	0.455871	0.455871	0.455871	0.455871	0.982323	0.886608	0.783882	0	0.699579	0.474265	0.558307	0.499248	0.454708	0.475272	0.455034	0.454708	0.454708	0.819319	0.786616	0
2050	1620	0.961064	0.780215	0.454708	0.455871	0.626751	0.454708	0.455871	0.455871	0.455871	0.455871	0.982323	0.886608	0.783882	0	0.699579	0.474265	0.558307	0.499248	0.454708	0.475272	0.455034	0.454708	0.454708	0.819319	0.786616	0
2050	1640	0.961064	0.780215	0.454708	0.455871	0.626751	0.454708	0.455871	0.455871	0.455871	0.455871	0.982323	0.886608	0.783882	0	0.699579	0.474265	0.558307	0.499248	0.454708	0.475272	0.455034	0.454708	0.454708	0.819319	0.786616	0
2050	1660	0.961064	0.780215	0.454708	0.455871	0.626751	0.454708	0.455871	0.455871	0.455871	0.455871	0.982323	0.886608	0.783882	0	0.699579	0.474265	0.558307	0.499248	0.454708	0.475272	0.455034	0.454708	0.454708	0.819319	0.786616	0
2050	1680	0.961064	0.780215	0.454708	0.455871	0.626751	0.454708	0.455871	0.455871	0.455871	0.455871	0.982323	0.886608	0.783882	0	0.699579	0.474265	0.558307	0.499248	0.454708	0.475272	0.455034	0.454708	0.454708	0.819319	0.786616	0
2050	1700	0.961064	0.780215	0.454708	0.455871	0.626751	0.454708	0.455871	0.455871	0.455871	0.455871	0.982323	0.886608	0.783882	0	0.699579	0.474265	0.558307	0.499248	0.454708	0.475272	0.455034	0.454708	0.454708	0.819319	0.786616	0
2050	1720	0.961064	0.780215	0.454708	0.455871	0.626751	0.454708	0.455871	0.455871	0.455871	0.455871	0.982323	0.886608	0.783882	0	0.699579	0.474265	0.558307	0.499248	0.454708	0.475272	0.455034	0.454708	0.454708	0.819319	0.786616	0
2050	1740	0.961064	0.780215	0.454708	0.455871	0.626751	0.454708	0.455871	0.455871	0.455871	0.455871	0.982323	0.886608	0.783882	0	0.699579	0.474265	0.558307	0.499248	0.454708	0.475272	0.455034	0.454708	0.454708	0.819319	0.786616	0
2050	1760	0.961064	0.780215	0.454708	0.455871	0.626751	0.454708	0.455871	0.455871	0.455871	0.455871	0.982323	0.886608	0.783882	0	0.699579	0.474265	0.558307	0.499248	0.454708	0.475272	0.455034	0.454708	0.454708	0.819319	0.786616	0
2050	1780	0.961064	0.780215	0.454708	0.455871	0.626751	0.454708	0.455871	0.455871	0.455871	0.455871	0.982323	0.886608	0.783882	0	0.699579	0.474265	0.558307	0.499248	0.454708	0.475272	0.455034	0.454708	0.454708	0.819319	0.786616	0
2050	1800	0.961064	0.780215	0.454708	0.455871	0.626751	0.454708	0.455871	0.455871	0.455871	0.455871	0.982323	0.886608	0.783882	0	0.699579	0.474265	0.558307	0.499248	0.454708	0.475272	0.455034	0.454708	0.454708	0.819319	0.786616	0
2050	1820	0.961064	0.780215	0.454708	0.455871	0.626751	0.454708	0.455871	0.455871	0.455871	0.455871	0.982323	0.886608	0.783882	0	0.699579	0.474265	0.558307	0.499248	0.454708	0.475272	0.455034	0.454708	0.454708	0.819319	0.786616	0
2050	1840	0.961064	0.780215	0.454708	0.455871	0.626751	0.454708	0.455871	0.455871	0.455871	0.455871	0.982323	0.886608	0.783882	0	0.699579	0.474265	0.558307	0.499248	0.454708	0.475272	0.455034	0.454708	0.454708	0.819319	0.786616	0
2050	1860	0.961064	0.780215	0.454708	0.455871	0.626751	0.454708	0.455871	0.455871	0.455871	0.455871	0.982323	0.886608	0.783882	0	0.699579	0.474265	0.558307	0.499248	0.454708	0.475272	0.455034	0.454708	0.454708	0.819319	0.786616	0
2050	1880	0.961064	0.780215	0.454708	0.455871	0.626751	0.454708	0.455871	0.455871	0.455871	0.455871	0.982323	0.886608	0.783882	0	0.699579	0.474265	0.558307	0.499248	0.454708	0.475272	0.455034	0.454708	0.454708	0.819319	0.786616	0
2050	1900	0.961064	0.780215	0.454708	0.455871	0.626751	0.454708	0.455871	0.455871	0.455871	0.455871	0.982323	0.886608	0.783882	0	0.699579	0.474265	0.558307	0.499248	0.454708	0.475272	0.455034	0.454708	0.454708	0.819319	0.786616	0
2050	1920	0.961064	0.780215	0.454708	0.455871	0.626751	0.454708	0.455871	0.455871	0.455871	0.455871	0.982323	0.886608	0.783882	0	0.699579	0.474265	0.558307	0.499248	0.454708	0.475272	0.455034	0.454708	0.454708	0.819319	0.786616	0
2050	1940	0.961064	0.780215	0.454708	0.455871	0.626751	0.454708	0.455871	0.455871	0.455871	0.455871	0.982323	0.886608	0.783882	0	0.699579	0.474265	0.558307	0.499248	0.454708	0.475272	0.455034	0.454708	0.454708	0.819319	0.786616	0
2050	1960	0.961064	0.780215	0.454708	0.455871	0.626751	0.454708	0.455871	0.455871	0.455871	0.455871	0.982323	0.886608	0.783882	0	0.699579	0.474265	0.558307	0.499248	0.454708	0.475272	0.455034	0.454708	0.454708	0.819319	0.786616	0
2050	1980	0.961064	0.780215	0.454708	0.455871	0.626751	0.454708	0.455871	0.455871	0.455871	0.455871	0.982323	0.886608	0.783882	0	0.699579	0.474265	0.558307	0.499248	0.454708	0.475272	0.455034	0.454708	0.454708	0.819319	0.786616	0
2050	2000	0.961064	0.780215	0.454708	0.455871	0.626751	0.454708	0.455871	0.455871	0.455871	0.455871	0.982323	0.886608	0.783882	0	0.699579	0.474265	0.558307	0.499248	0.454708	0.475272	0.455034	0.454708	0.454708	0.819319	0.786616	0
2050	2020	0.961064	0.780215	0.454708	0.455871	0.626751	0.454708	0.455871	0.455871	0.455871	0.455871	0.982323	0.886608	0.783882	0	0.699579	0.474265	0.558307	0.499248	0.454708	0.475272	0.455034	0.454708	0.454708	0.819319	0.786616	0
2050	2040	0.961064	0.780215	0.454708	0.455871	0.626751	0.454708	0.455871	0.455871	0.455871	0.455871	0.982323	0.886608	0.783882	0	0.699579	0.474265	0.558307	0.499248	0.454708	0.475272	0.455034	0.454708	0.454708	0.819319	0.786616	0
2050	2060	0.961064	0.780215	0.454708	0.455871	0.626751	0.454708	0.455871	0.455871	0.455871	0.455871	0.982323	0.886608	0.783882	0	0.699579	0.474265	0.558307	0.499248	0.454708	0.475272	0.455034	0.454708	0.454708	0.819319	0.786616	0
2050	2080	0.961064	0.780215	0.454708	0.455871	0.626751	0.454708	0.455871	0.455871	0.455871	0.455871	0.982323	0.886608	0.783882	0	0.699579	0.474265	0.558307	0.499248	0.454708	0.475272	0.455034	0.454708	0.454708	0.819319	0.786616	0
2050	2100	0.961064	0.780215	0.454708	0.455871	0.626751	0.454708	0.455871	0.455871	0.455871	0.455871	0.982323	0.886608	0.783882	0	0.699579	0.474265	0.558307	0.499248	0.454708	0.475272	0.455034	0.454708	0.454708	0.819319	0.786616	0
2050	2120	0.961064	0.780215	0.454708	0.455871	0.626751	0.454708	0.455871	0.455871	0.455871	0.455871	0.982323	0.886608	0.783882	0	0.699579	0.474265	0.558307	0.499248	0.454708	0.475272	0.455034	0.454708	0.454708	0.819319	0.786616	0
2050	2140	0.961064	0.780215	0.454708	0.455871	0.626751	0.454708	0.455871	0.455871	0.455871	0.455871	0.982323	0.886608	0.783882	0	0.699579	0.474265	0.558307	0.499248	0.454708	0.475272	0.455034	0.454708	0.454708	0.819319	0.786616	0
2050	2160	0.961064	0.780215	0.454708	0.455871	0.626751	0.454708	0.455871	0.455871	0.455871	0.455871	0.982323	0.886608	0.783882	0	0.699579	0.474265	0.558307	0.499248	0.454708	0.475272	0.455034	0.454708	0.454708	0.819319	0.786616	0
2050	2180	0.961064	0.780215	0.454708	0.455871	0.626751	0.454708	0.455871	0.455871	0.455871	0.455871	0.982323	0.886608	0.783882	0	0.699579	0.474265	0.558307	0.499248	0.454708	0.475272	0.455034	0.454708	0.454708	0.819319	0.786616	0
2050	2200	0.961064	0.780215	0.454708	0.455871	0.626751	0.454708	0.455871	0.455871	0.455871	0.455871	0.982323	0.886608	0.783882	0	0.699579	0.474265	0.558307	0.499248	0.454708	0.475272	0.455034	0.454708	0.454708	0.819319	0.786616	0
2050	2220	0.961064	0.780215	0.454708	0.455871	0.626751	0.454708	0.455871	0.455871	0.455871	0.455871	0.982323	0.886608	0.783882	0	0.699579	0.474265	0.558307	0.499248	0.454708	0.475272	0.455034	0.454708	0.454708	0.819319	0.786616	0
2050	2240	0.961064	0.780215	0.454708	0.455871	0.626751	0.454708	0.455871	0.455871	0.455871	0.455871	0.982323	0.886608	0.783882	0	0.699579	0.474265	0.558307	0.499248	0.454708	0.475272	0.455034	0.454708	0.454708	0.819319	0.786616	0
2050	2260	0.961064	0.780215	0.454708	0.455871	0.626751	0.454708	0.455871	0.455871	0.455871	0.455871	0.982323	0.886608	0.783882	0	0.699579	0.474265	0.558307	0.499248	0.454708	0.475272	0.455034	0.454708	0.454708	0.819319	0.786616	0
2050	2280	0.961064	0.780215	0.454708	0.455871	0.626751	0.454708	0.455871	0.455871	0.455871	0.455871	0.982323	0.886608	0.783882	0	0.699579	0.474265	0.558307	0.499248	0.454708	0.475272	0.455034	0.454708	0.454708	0.819319	0.786616	0
2050	2300	0.961064	0.780215	0.454708	0.455871	0.626751	0.454708	0.455871	0.455871	0.455871	0.455871	0.982323	0.886608	0.783882	0	0.699579	0.474265	0.558307	0.499248	0.454708	0.475272	0.455034	0.454708	0.454708	0.819319	0.786616	0
2050	2320	0.961064	0.780215	0.454708	0.455871	0.626751	0.454708	0.455871	0.455871	0.455871	0.455871	0.982323	0.886608	0.783882	0	0.699579	0.474265	0.558307	0.499248	0.454708	0.475272	0.455034	0.454708	0.454708	0.819319	0.786616	0
2050	2340	0.961064	0.780215	0.454708	0.455871	0.626751	0.454708	0.455871	0.455871	0.455871	0.455871	0.982323	0.886608	0.783882	0	0.699579	0.474265	0.558307	0.499248	0.454708	0.475272	0.455034	0.454708	0.454708	0.819319	0.786616	0
2050	2360	0.961064	0.780215	0.454708	0.455871	0.626751	0.454708	0.455871	0.455871	0.455871	0.455871	0.982323	0.886608	0.783882	0	0.699579	0.474265	0.558307	0.499248	0.454708	0.475272	0.455034	0.454708	0.454708	0.819319	0.786616	0
2050	2380	0.961064	0.780215	0.454708	0.455871	0.626751	0.454708	0.455871	0.455871	0.455871	0.455871	0.982323	0.886608	0.783882	0	0.699579	0.474265	0.558307	0.499248	0.454708	0.475272	0.455034	0.454708	0.454708	0.819319	0.786616	0
2050	2400	0.961064	0.780215	0.454708	0.455871	0.626751	0.454708	0.455871	0.455871	0.455871	0.455871	0.982323	0.886608	0.783882	0	0.699579	0.474265	0.558307	0.499248	0.454708	0.475272	0.455034	0.454708	0.454708	0.819319	0.786616	0
2050	2420	0.961064	0.780215	0.454708	0.455871	0.626751	0.454708	0.455871	0.455871	0.455871	0.455871	0.982323	0.886608	0.783882	0	0.699579	0.474265	0.558307	0.499248	0.454708	0.475272	0.455034	0.454708	0.454708	0.819319	0.786616	0
2050	2440	0.961064	0.780215	0.454708	0.455871	0.626751	0.454708	0.455871	0.455871	0.455871	0.455871	0.982323	0.886608	0.783882	0	0.699579	0.474265	0.558307	0.499248	0.454708	0.475272	0.455034	0.454708	0.454708	0.819319	0.786616	0
2050	2460	0.961064	0.780215	0.454708	0.455871	0.626751	0.454708	0.455871	0.455871	0.455871	0.455871	0.982323	0.886608	0.783882	0	0.699579	0.474265	0.558307	0.499248	0.454708	0.475272	0.455034	0.454708	0.454708	0.819319	0.786616	0
2050	2480	0.961064	0.780215	0.454708	0.455871	0.626751	0.454708	0.455871	0.455871	0.455871	0.455871	0.982323	0.886608	0.783882	0	0.699579	0.474265	0.558307	0.499248	0.454708	0.475272	0.455034	0.454708	0.454708	0.819319	0.786616	0
2050	2500	0.961064	0.780215	0.454708	0.455871	0.626751	0.454708	0.455871	0.455871	0.455871	0.455871	0.982323	0.886608	0.783882	0	0.699579	0.474265	0.558307	0.499248	0.454708	0.475272	0.455034	0.454708	0.454708	0.819319	0.786616	0
2050	2520	0.961064	0.780215	0.454708	0.455871	0.626751	0.454708	0.455871	0.455871	0.455871	0.455871	0.982323	0.886608	0.783882	0	0.699579	0.474265	0.558307	0.499248	0.454708	0.475272	0.455034	0.454708	0.454708	0.819319	0.786616	0
2050	2540	0.961064	0.780215	0.454708	0.455871	0.626751	0.454708	0.455871	0.455871	0.455871	0.455871	0.982323	0.886608	0.783882	0	0.699579	0.474265	0.558307	0.499248	0.454708	0.475272	0.455034	0.454708	0.454708	0.819319	0.786616	0
2050	2560	0.961064	0.780215	0.454708	0.455871	0.626751	0.454708	0.455871	0.455871	0.455871	0.455871	0.982323	0.886608	0.783882	0	0.699579	0.474265	0.558307	0.499248	0.454708	0.475272	0.455034	0.454708	0.454708	0.819319	0.786616	0
2050	2580	0.961064	0.780215	0.454708	0.455871	0.626751	0.454708	0.455871	0.455871	0.455871	0.455871	0.982323	0.886608	0.783882	0	0.699579	0.474265	0.558307	0.499248	0.454708	0.475272	0.455034	0.454708	0.454708	0.819319	0.786616	0
2050	2600	0.961064	0.780215	0.454708	0.455871	0.626751	0.454708	0.455871	0.455871	0.455871	0.455871	0.982323	0.886608	0.783882	0	0.699579	0.474265	0.558307	0.499248	0.454708	0.475272	0.455034	0.454708	0.454708	0.819319	0.786616	0
2050	2620	0.961064	0.780215	0.454708	0.455871	0.626751	0.454708	0.455871	0.455871	0.455871	0.455871	0.982323	0.886608	0.783882	0	0.699579	0.474265	0.558307	0.499248	0.454708	0.475272	0.455034	0.454708	0.454708	0.819319	0.786616	0
2050	2640	0.961064	0.780215	0.454708	0.455871	0.626751	0.454708	0.455871	0.455871	0.455871	0.455871	0.982323	0.886608	0.783882	0	0.699579	0.474265	0.558307	0.499248	0.454708	0.475272	0.455034	0.454708	0.454708	0.819319	0.786616	0
2050	2660	0.961064	0.780215	0.454708	0.455871	0.626751	0.454708	0.455871	0.455871	0.455871	0.455871	0.982323	0.886608	0.783882	0	0.699579	0.474265	0.558307	0.499248	0.454708	0.475272	0.455034	0.454708	0.454708	0.819319	0.786616	0
2050	2680	0.961064	0.780215	0.454708	0.455871	0.626751	0.454708	0.455871	0.455871	0.455871	0.455871	0.982323	0.886608	0.783882	0	0.699579	0.474265	0.558307	0.499248	0.454708	0.475272	0.455034	0.454708	0.454708	0.819319	0.786616	0
2050	2700	0.961064	0.780215	0.454708	0.455871	0.626751	0.454708	0.455871	0.455871	0.455871	0.455871	0.982323	0.886608	0.783882	0	0.699579	0.474265	0.558307	0.499248	0.454708	0.475272	0.455034	0.454708	0.454708	0.819319	0.786616	0
2050	2720	0.961064	0.780215	0.454708	0.455871	0.626751	0.454708	0.455871	0.455871	0.455871	0.455871	0.982323	0.886608	0.783882	0	0.699579	0.474265	0.558307	0.499248	0.454708	0.475272	0.455034	0.454708	0.454708	0.819319	0.786616	0
2050	2740	0.961064	0.780215	0.454708	0.455871	0.626751	0.454708	0.455871	0.455871	0.455871	0.455871	0.982323	0.886608	0.783882	0	0.699579	0.474265	0.558307	0.499248	0.454708	0.475272	0.455034	0.454708	0.454708	0.819319	0.786616	0
2050	2760	0.961064	0.780215	0.454708	0.455871	0.626751	0.454708	0.455871	0.455871	0.455871	0.455871	0.982323	0.886608	0.783882	0	0.699579	0.474265	0.558307	0.499248	0.454708	0.475272	0.455034	0.454708	0.454708	0.819319	0.786616	0
2050	2780	0.961064	0.780215	0.454708	0.455871	0.626751	0.454708	0.455871	0.455871	0.455871	0.455871	0.982323	0.886608	0.783882	0	0.699579	0.474265	0.558307	0.499248	0.454708	0.475272	0.455034	0.454708	0.454708	0.819319	0.786616	0
2050	2800	0.961064	0.780215	0.454708	0.455871	0.626751	0.454708	0.455871	0.455871	0.455871	0.455871	0.982323	0.886608	0.783882	0	0.699579	0.474265	0.558307	0.499248	0.454708	0.475272	0.455034	0.454708	0.454708	0.819319	0.786616	0
2050	2820	0.961064	0.780215	0.454708	0.455871	0.626751	0.454708	0.455871	0.455871	0.455871	0.455871	0.982323	0.886608	0.783882	0	0.699579	0.474265	0.558307	0.499248	0.454708	0.475272	0.455034	0.454708	0.454708	0.819319	0.786616	0
2050	2840	0.961064	0.780215	0.454708	0.455871	0.626751	0.454708	0.455871	0.455871	0.455871	0.455871	0.982323	0.886608	0.783882	0	0.699579	0.474265	0.558307	0.499248	0.454708	0.475272	0.455034	0.454708	0.454708	0.819319	0.786616	0
2050	2860	0.961064	0.780215	0.454708	0.455871	0.626751	0.454708	0.455871	0.455871	0.455871	0.455871	0.982323	0.886608	0.783882	0	0.699579	0.474265	0.558307	0.499248	0.454708	0.475272	0.455034	0.454708	0.454708	0.819319	0.786616	0
2050	2880	0.961064	0.780215	0.454708	0.455871	0.626751	0.454708	0.455871	0.455871	0.455871	0.455871	0.982323	0.886608	0.783882	0	0.699579	0.474265	0.558307	0.499248	0.454708	0.475272	0.455034	0.454708	0.454708	0.819319	0.786616	0
2050	2900	0.961064	0.780215	0.454708	0.455871	0.626751	0.454708	0.455871	0.455871	0.455871	0.455871	0.982323	0.886608	0.783882	0	0.699579	0.474265	0.558307	0.499248	0.454708	0.475272	0.455034	0.454708	0.454708	0.819319	0.786616	0
2050	2920	0.961064	0.780215	0.454708	0.455871	0.626751	0.454708	0.455871	0.455871	0.455871	0.455871	0.982323	0.886608	0.783882	0	0.699579	0.474265	0.558307	0.499248	0.454708	0.475272	0.455034	0.454708	0.454708	0.819319	0.786616	0
2050	2940	0.961064	0.780215	0.454708	0.455871	0.626751	0.454708	0.455871	0.455871	0.455871	0.455871	0.982323	0.886608	0.783882	0	0.699579	0.474265	0.558307	0.499248	0.454708	0.475272	0.455034	0.454708	0.454708	0.819319	0.786616	0
2050	2960	0.961064	0.780215	0.454708	0.455871	0.626751	0.454708	0.455871	0.455871	0.455871	0.455871	0.982323	0.886608	0.783882	0	0.699579	0.474265	0.558307	0.499248	0.454708	0.475272	0.455034	0.454708	0.454708	0.819319	0.786616	0
2050	2980	0.961064	0.780215	0.454708	0.455871	0.626751	0.454708	0.455871	0.455871	0.455871	0.455871	0.982323	0.886608	0.783882	0	0.699579	0.474265	0.558307	0.499248	0.454708	0.475272	0.455034	0.454708	0.454708	0.819319	0.786616	0
2050	3000	0.961064	0.780215	0.454708	0.455871	0.626751	0.454708	0.455871	0.455871	0.455871	0.455871	0.982323	0.886608	0.783882	0	0.699579	0.474265	0.558307	0.499248	0.454708	0.475272	0.455034	0.454708	0.454708	0.819319	0.786616	0
2050	3020	0.961064	0.780215	0.454708	0.455871	0.626751	0.454708	0.455871	0.455871	0.455871	0.455871	0.982323	0.886608	0.783882	0	0.699579	0.474265	0.558307	0.499248	0.454708	0.475272	0.455034	0.454708	0.454708	0.819319	0.786616	0
2050	3040	0.961064	0.780215	0.454708	0.455871	0.626751	0.454708	0.455871	0.455871	0.455871	0.455871	0.982323	0.886608	0.783882	0	0.699579	0.474265	0.558307	0.499248	0.454708	0.475272	0.455034	0.454708	0.454708	0.819319	0.786616	0
2050	3060	0.961064	0.780215	0.454708	0.455871	0.626751	0.454708	0.455871	0.455871	0.455871	0.455871	0.982323	0.886608	0.783882	0	0.699579	0.474265	0.558307	0.499248	0.454708	0.475272	0.455034	0.454708	0.454708	0.819319	0.786616	0
2050	3080	0.961064	0.780215	0.454708	0.455871	0.626751	0.454708	0.455871	0.455871	0.455871	0.455871	0.982323	0.886608	0.783882	0	0.699579	0.474265	0.558307	0.499248	0.454708	0.475272	0.455034	0.454708	0.454708	0.819319	0.786616	0
2050	3100	0.961064	0.780215	0.454708	0.455871	0.626751	0.454708	0.455871	0.455871	0.455871	0.455871	0.982323	0.886608	0.783882	0	0.699579	0.474265	0.558307	0.499248	0.454708	0.475272	0.455034	0.454708	0.454708	0.819319	0.786616	0
2050	3120	0.961064	0.780215	0.454708	0.455871	0.626751	0.454708	0.455871	0.455871	0.455871	0.455871	0.982323	0.886608	0.783882	0	0.699579	0.474265	0.558307	0.499248	0.454708	0.475272	0.455034	0.454708	0.454708	0.819319	0.786616	0
2050	3140	0.961064	0.780215	0.454708	0.455871	0.626751	0.454708	0.455871	0.455871	0.455871	0.455871	0.982323	0.886608	0.783882	0	0.699579	0.474265	0.558307	0.499248	0.454708	0.475272	0.455034	0.454708	0.454708	0.819319	0.786616	0
2050	3160	0.961064	0.780215	0.454708	0.455871	0.626751	0.454708	0.455871	0.455871	0.455871	0.455871	0.982323	0.886608	0.783882	0	0.699579	0.474265	0.558307	0.499248	0.454708	0.475272	0.455034	0.454708	0.454708	0.819319	0.786616	0
2050	3180	0.961064	0.780215	0.454708	0.455871	0.626751	0.454708	0.455871	0.455871	0.455871	0.455871	0.982323	0.886608	0.783882	0	0.699579	0.474265	0.558307	0.499248	0.454708	0.475272	0.455034	0.454708	0.454708	0.819319	0.786616	0
2050	3200	0.961064	0.780215	0.454708	0.455871	0.626751	0.454708	0.455871	0.455871	0.455871	0.455871	0.982323	0.886608	0.783882	0	0.699579	0.474265	0.558307	0.499248	0.454708	0.475272	0.455034	0.454708	0.454708	0.819319	0.786616	0
2050	3220	0.961064	0.780215	0.454708	0.455871	0.626751	0.454708	0.455871	0.455871	0.455871	0.455871	0.982323	0.886608	0.783882	0	0.699579	0.474265	0.558307	0.499248	0.454708	0.475272	0.455034	0.454708	0.454708	0.819319	0.786616	0
2050	3240	0.961064	0.780215	0.454708	0.455871	0.626751	0.454708	0.455871	0.455871	0.455871	0.455871	0.982323	0.886608	0.783882	0	0.699579	0.474265	0.558307	0.499248	0.454708	0.475272	0.455034	0.454708	0.454708	0.819319	0.786616	0
2050	3260	0.961064	0.780215	0.454708	0.455871	0.626751	0.454708	0.455871	0.455871	0.455871	0.455871	0.982323	0.886608	0.783882	0	0.699579	0.474265	0.558307	0.499248	0.454708	0.475272	0.455034	0.454708	0.454708	0.819319	0.786616	0
2050	3280	0.961064	0.780215	0.454708	0.455871	0.626751	0.454708	0.455871	0.455871	0.455871	0.455871	0.982323	0.886608	0.783882	0	0.699579	0.474265	0.558307	0.499248	0.454708	0.475272	0.455034	0.454708	0.454708	0.819319	0.786616	0
2050	3300	0.961064	0.780215	0.454708	0.455871	0.626751	0.454708	0.455871	0.455871	0.455871	0.455871	0.982323	0.886608	0.783882	0	0.699579	0.474265	0.558307	0.499248	0.454708	0.475272	0.455034	0.454708	0.454708	0.819319	0.786616	0
2050	3320	0.961064	0.780215	0.454708	0.455871	0.626751	0.454708	0.455871	0.455871	0.455871	0.455871	0.982323	0.886608	0.783882	0	0.699579	0.474265	0.558307	0.499248	0.454708	0.475272	0.455034	0.454708	0.454708	0.819319	0.786616	0
2050	3340	0.961064	0.780215	0.454708	0.455871	0.626751	0.454708	0.455871	0.455871	0.455871	0.455871	0.982323	0.886608	0.783882	0	0.699579	0.474265	0.558307	0.499248	0.454708	0.475272	0.455034	0.454708	0.454708	0.819319	0.786616	0
2050	3360	0.961064	0.780215	0.454708	0.455871	0.626751	0.454708	0.455871	0.455871	0.455871	0.455871	0.982323	0.886608	0.783882	0	0.699579	0.474265	0.558307	0.499248	0.454708	0.475272	0.455034	0.454708	0.454708	0.819319	0.786616	0
2050	3380	0.961064	0.780215	0.454708	0.455871	0.626751	0.454708	0.455871	0.455871	0.455871	0.455871	0.982323	0.886608	0.783882	0	0.699579	0.474265	0.558307	0.499248	0.454708	0.475272	0.455034	0.454708	0.454708	0.819319	0.786616	0
2050	3400	0.961064	0.780215	0.454708	0.455871	0.626751	0.454708	0.455871	0.455871	0.455871	0.455871	0.982323	0.886608	0.783882	0	0.699579	0.474265	0.558307	0.499248	0.454708	0.475272	0.455034	0.454708	0.454708	0.819319	0.786616	0
2050	3420	0.961064	0.780215	0.454708	0.455871	0.626751	0.454708	0.455871	0.455871	0.455871	0.455871	0.982323	0.886608	0.783882	0	0.699579	0.474265	0.558307	0.499248	0.454708	0.475272	0.455034	0.454708	0.454708	0.819319	0.786616	0
2050	3440	0.961064	0.780215	0.454708	0.455871	0.626751	0.454708	0.455871	0.455871	0.455871	0.455871	0.982323	0.886608	0.783882	0	0.699579	0.474265	0.558307	0.499248	0.454708	0.475272	0.455034	0.454708	0.454708	0.819319	0.786616	0
2050	3460	0.961064	0.780215	0.454708	0.455871	0.626751	0.454708	0.455871	0.455871	0.455871	0.455871	0.982323	0.886608	0.783882	0	0.699579	0.474265	0.558307	0.499248	0.454708	0.475272	0.455034	0.454708	0.454708	0.819319	0.786616	0
2050	3480	0.961064	0.780215	0.454708	0.455871	0.626751	0.454708	0.455871	0.455871	0.455871	0.455871	0.982323	0.886608	0.783882	0	0.699579	0.474265	0.558307	0.499248	0.454708	0.475272	0.455034	0.454708	0.454708	0.819319	0.786616	0
2050	3500	0.961064	0.780215	0.454708	0.455871	0.626751	0.454708	0.455871	0.455871	0.455871	0.455871	0.982323	0.886608	0.783882	0	0.699579	0.474265	0.558307	0.499248	0.454708	0.475272	0.455034	0.454708	0.454708	0.819319	0.786616	0
2050	3520	0.961064	0.780215	0.454708	0.455871	0.626751	0.454708	0.455871	0.455871	0.455871	0.455871	0.982323	0.886608	0.783882	0	0.699579	0.474265	0.558307	0.499248	0.454708	0.475272	0.455034	0.454708	0.454708	0.819319	0.786616	0
2050	3540	0.961064	0.780215	0.454708	0.455871	0.626751	0.454708	0.455871	0.455871	0.455871	0.455871	0.982323	0.886608	0.783882	0	0.699579	0.474265	0.558307	0.499248	0.454708	0.475272	0.455034	0.454708	0.454708	0.819319	0.786616	0.604667
2050	3560	0.961064	0.780215	0.454708	0.455871	0.626751	0.454708	0.455871	0.455871	0.455871	0.455871	0.982323	0.886608	0.783882	0	0.699579	0.474265	0.558307	0.499248	0.454708	0.475272	0.455034	0.454708	0.454708	0.819319	0.786616	0.604667
2050	3580	0.961064	0.780215	0.454708	0.455871	0.626751	0.454708	0.455871	0.455871	0.455871	0.455871	0.982323	0.886608	0.783882	0	0.699579	0.474265	0.558307	0.499248	0.454708	0.475272	0.455034	0.454708	0.454708	0.819319	0.786616	0.604667
2050	3600	0.961064	0.780215	0.454708	0.455871	0.626751	0.454708	0.455871	0.455871	0.455871	0.455871	0.982323	0.886608	0.783882	0	0.699579	0.474265	0.558307	0.499248	0.454708	0.475272	0.455034	0.454708	0.454708	0.819319	0.786616	0.604667
2050	3620	0.961064	0.780215	0.454708	0.455871	0.626751	0.454708	0.455871	0.455871	0.455871	0.455871	0.982323	0.886608	0.783882	0	0.699579	0.474265	0.558307	0.499248	0.454708	0.475272	0.455034	0.454708	0.454708	0.819319	0.786616	0.604667
2050	3640	0.961064	0.780215	0.454708	0.455871	0.626751	0.454708	0.455871	0.455871	0.455871	0.455871	0.982323	0.886608	0.783882	0	0.699579	0.474265	0.558307	0.499248	0.454708	0.475272	0.455034	0.454708	0.454708	0.819319	0.786616	0.604667
2050	3660	0.961064	0.780215	0.454708	0.455871	0.626751	0.454708	0.455871	0.455871	0.455871	0.455871	0.982323	0.886608	0.783882	0	0.699579	0.474265	0.558307	0.499248	0.454708	0.475272	0.455034	0.454708	0.454708	0.819319	0.786616	0.604667
2050	3680	0.961064	0.780215	0.454708	0.455871	0.626751	0.454708	0.455871	0.455871	0.455871	0.455871	0.982323	0.886608	0.783882	0	0.699579	0.474265	0.558307	0.499248	0.454708	0.475272	0.455034	0.454708	0.454708	0.819319	0.786616	0.604667
2050	3700	0.961064	0.780215	0.454708	0.455871	0.626751	0.454708	0.455871	0.455871	0.455871	0.455871	0.982323	0.886608	0.783882	0	0.699579	0.474265	0.558307	0.499248	0.454708	0.475272	0.455034	0.454708	0.454708	0.819319	0.786616	0.604667
2050	3720	0.961064	0.780215	0.454708	0.455871	0.626751	0.454708	0.455871	0.455871	0.455871	0.455871	0.982323	0.886608	0.783882	0	0.699579	0.474265	0.558307	0.499248	0.454708	0.475272	0.455034	0.454708	0.454708	0.819319	0.786616	0.604667
2050	3740	0.961064	0.780215	0.454708	0.455871	0.626751	0.454708	0.455871	0.455871	0.455871	0.455871	0.982323	0.886608	0.783882	0	0.699579	0.474265	0.558307	0.499248	0.454708	0.475272	0.455034	0.454708	0.454708	0.819319	0.786616	0.604667
2050	3760	0.961064	0.780215	0.454708	0.455871	0.626751	0.454708	0.455871	0.455871	0.455871	0.455871	0.982323	0.886608	0.783882	0	0.699579	0.474265	0.558307	0.499248	0.454708	0.475272	0.455034	0.454708	0.454708	0.819319	0.786616	0.604667
2050	3780	0.961064	0.780215	0.454708	0.455871	0.626751	0.454708	0.455871	0.455871	0.455871	0.455871	0.982323	0.886608	0.783882	0	0.699579	0.474265	0.558307	0.499248	0.454708	0.475272	0.455034	0.454708	0.454708	0.819319	0.786616	0.604667
2050	3800	0.961064	0.780215	0.454708	0.455871	0.626751	0.454708	0.455871	0.455871	0.455871	0.455871	0.982323	0.886608	0.783882	0	0.699579	0.474265	0.558307	0.499248	0.454708	0.475272	0.455034	0.454708	0.454708	0.819319	0.786616	0.604667
2050	3820	0.961064	0.780215	0.454708	0.455871	0.626751	0.454708	0.455871	0.455871	0.455871	0.455871	0.982323	0.886608	0.783882	0	0.699579	0.474265	0.558307	0.499248	0.454708	0.475272	0.455034	0.454708	0.454708	0.819319	0.786616	0.604667
2050	3840	0.961064	0.780215	0.454708	0.455871	0.626751	0.454708	0.455871	0.455871	0.455871	0.455871	0.982323	0.886608	0.783882	0	0.699579	0.474265	0.558307	0.499248	0.454708	0.475272	0.455034	0.454708	0.454708	0.819319	0.786616	0.604667
2050	3860	0.961064	0.780215	0.454708	0.455871	0.626751	0.454708	0.455871	0.455871	0.455871	0.455871	0.982323	0.886608	0.783882	0	0.699579	0.474265	0.558307	0.499248	0.454708	0.475272	0.455034	0.454708	0.454708	0.819319	0.786616	0.604667
2050	3880	0.961064	0.780215	0.454708	0.455871	0.626751	0.454708	0.455871	0.455871	0.455871	0.455871	0.982323	0.886608	0.783882	0	0.699579	0.474265	0.558307	0.499248	0.454708	0.475272	0.455034	0.454708	0.454708	0.819319	0.786616	0.604667
2050	3900	0.961064	0.780215	0.454708	0.455871	0.626751	0.454708	0.455871	0.455871	0.455871	0.455871	0.982323	0.886608	0.783882	0	0.699579	0.474265	0.558307	0.499248	0.454708	0.475272	0.455034	0.454708	0.454708	0.819319	0.786616	0.604667
2050	3920	0.961064	0.780215	0.454708	0.455871	0.626751	0.454708	0.455871	0.455871	0.455871	0.455871	0.982323	0.886608	0.783882	0	0.699579	0.474265	0.558307	0.499248	0.454708	0.475272	0.455034	0.454708	0.454708	0.819319	0.786616	0.604667
2050	3940	0.961064	0.780215	0.454708	0.455871	0.626751	0.454708	0.455871	0.455871	0.455871	0.455871	0.982323	0.886608	0.783882	0	0.699579	0.474265	0.558307	0.499248	0.454708	0.475272	0.455034	0.454708	0.454708	0.819319	0.786616	0.604667
2050	3960	0.961064	0.780215	0.454708	0.455871	0.626751	0.454708	0.455871	0.455871	0.455871	0.455871	0.982323	0.886608	0.783882	0	0.699579	0.474265	0.558307	0.499248	0.454708	0.475272	0.455034	0.454708	0.454708	0.819319	0.786616	0.604667
2050	3980	0.961064	0.780215	0.454708	0.455871	0.626751	0.454708	0.455871	0.455871	0.455871	0.455871	0.982323	0.886608	0.783882	0	0.699579	0.474265	0.558307	0.499248	0.454708	0.475272	0.455034	0.454708	0.454708	0.819319	0.786616	0.604667
2050	4000	0.961064	0.780215	0.454708	0.455871	0.626751	0.454708	0.455871	0.455871	0.455871	0.455871	0.982323	0.886608	0.783882	0	0.699579	0.474265	0.558307	0.499248	0.454708	0.475272	0.455034	0.454708	0.454708	0.819319	0.786616	0.604667
2100	0	0	0	0	0	0	0	0	0	0	0	0	0	0	0	0	0	0	0	0	0	0	0	0	0	0	0
2100	20	0.822916	0.589053	0	0	0	0	0	0	0	0	0.353168	0.103169	0.50009	0.333044	0.318256	0.3509	0	0	0	0.325703	0.303866	0	0	0.637126	0.204476	0
2100	40	0.822916	0.589053	0.425385	0.303917	0.320294	0.421845	0.303917	0.303917	0.303917	0.303917	0.595383	0.643591	0.572568	0.79	0.319806	0.491246	0.318327	0.0206284	0.425385	0.332713	0.425399	0.425385	0.425385	0.637126	0.372096	0
2100	60	0.822916	0.589053	0.425385	0.425438	0.43772	0.421845	0.425438	0.425438	0.425438	0.425438	0.595383	0.686642	0.572568	0.79	0.319806	0.532747	0.436245	0.0206284	0.425385	0.332713	0.425399	0.425385	0.425385	0.659208	0.476572	0
2100	80	0.822916	0.589053	0.425385	0.425438	0.43772	0.435589	0.425438	0.425438	0.425438	0.425438	0.595383	0.742278	0.572568	0.79	0.441398	0.532859	0.436245	0.0206284	0.425385	0.471451	0.474184	0.425385	0.425385	0.817412	0.633931	0
2100	100	0.822916	0.589053	0.425385	0.425438	0.43772	0.435589	0.425438	0.425438	0.425438	0.425438	0.595383	0.871429	0.572568	0.79	0.441398	0.532859	0.436245	0.0206284	0.425385	0.471451	0.474184	0.425385	0.425385	0.817412	0.633931	0
2100	120	0.822916	0.589053	0.425385	0.425438	0.43772	0.435589	0.425438	0.425438	0.425438	0.425438	0.612602	0.871429	0.79	0.79	0.441398	0.532859	0.436245	0.0206284	0.425385	0.471451	0.474184	0.425385	0.425385	0.817412	0.633931	0
2100	140	0.822916	0.79	0.425385	0.425438	0.43772	0.435589	0.425438	0.425438	0.425438	0.425438	0.749872	0.871429	0.79	0.79	0.441398	0.532859	0.436245	0.0206284	0.425385	0.471451	0.474184	0.425385	0.425385	0.817412	0.633931	0
2100	160	0.822916	0.79	0.425385	0.425438	0.43772	0.436003	0.425438	0.425438	0.425438	0.425438	0.749872	0.886029	0.79	0.79	0.441398	0.532859	0.436245	0.0206284	0.425385	0.471451	0.490212	0.425385	0.425385	0.817412	0.633931	0
2100	180	0.822916	0.79	0.425385	0.425438	0.43772	0.436003	0.425438	0.425438	0.425438	0.425438	0.749872	0.886029	0.79	0.79	0.789042	0.532859	0.436245	0.0206284	0.79	0.471451	0.490212	0.425385	0.425385	0.819319	0.633931	0
2100	200	0.822916	0.79	0.79	0.79	0.79	0.79	0.79	0.79	0.79	0.79	0.749872	0.886029	0.79	0.79	0.789042	0.532859	0.436245	0.0206284	0.79	0.471451	0.79	0.79	0.79	0.819319	0.79	0
2100	220	0.822916	0.79	0.79	0.79	0.79	0.79	0.79	0.79	0.79	0.79	0.749872	0.886029	0.79	0.79	0.79	0.79	0.79	0.0206284	0.79	0.79	0.79	0.79	0.79	0.819319	0.79	0
2100	240	0.822916	0.79	0.79	0.79	0.79	0.79	0.79	0.79	0.79	0.79	0.804648	0.886029	0.79	0.79	0.79	0.79	0.79	0.0206284	0.79	0.79	0.79	0.79	0.79	0.819319	0.79	0
2100	260	0.822916	0.79	0.79	0.79	0.79	0.79	0.79	0.79	0.79	0.79	0.804648	0.886029	0.79	0.79	0.79	0.79	0.79	0.0206284	0.79	0.79	0.79	0.79	0.79	0.819319	0.79	0
2100	280	0.822916	0.79	0.79	0.79	0.79	0.79	0.79	0.79	0.79	0.79	0.804648	0.886029	0.79	0.79	0.79	0.79	0.79	0.0206284	0.79	0.79	0.79	0.79	0.79	0.819319	0.79	0
2100	300	0.822916	0.79	0.79	0.79	0.79	0.79	0.79	0.79	0.79	0.79	0.804648	0.886029	0.79	0.79	0.79	0.79	0.79	0.0206284	0.79	0.79	0.79	0.79	0.79	0.819319	0.79	0
2100	320	0.822916	0.79	0.79	0.79	0.79	0.79	0.79	0.79	0.79	0.79	0.969636	0.886029	0.79	0.79	0.79	0.79	0.79	0.0206284	0.79	0.79	0.79	0.79	0.79	0.819319	0.79	0
2100	340	0.822916	0.79	0.79	0.79	0.79	0.79	0.79	0.79	0.79	0.79	0.969636	0.886029	0.79	0.79	0.79	0.79	0.79	0.0206284	0.79	0.79	0.79	0.79	0.79	0.819319	0.79	0
2100	360	0.822916	0.79	0.79	0.79	0.79	0.79	0.79	0.79	0.79	0.79	0.969636	0.886029	0.79	0.79	0.79	0.79	0.79	0.0206284	0.79	0.79	0.79	0.79	0.79	0.819319	0.79	0
2100	380	0.822916	0.79	0.79	0.79	0.79	0.79	0.79	0.79	0.79	0.79	0.969636	0.886029	0.79	0.79	0.79	0.79	0.79	0.0206284	0.79	0.79	0.79	0.79	0.79	0.819319	0.79	0
2100	400	0.822916	0.79	0.79	0.79	0.79	0.79	0.79	0.79	0.79	0.79	0.969636	0.886029	0.79	0.79	0.79	0.79	0.79	0.0206284	0.79	0.79	0.79	0.79	0.79	0.819319	0.79	0
2100	420	0.822916	0.79	0.79	0.79	0.79	0.79	0.79	0.79	0.79	0.79	0.969636	0.886029	0.79	0.79	0.79	0.79	0.79	0.0206284	0.79	0.79	0.79	0.79	0.79	0.819319	0.79	0
2100	440	0.822916	0.79	0.79	0.79	0.79	0.79	0.79	0.79	0.79	0.79	0.969636	0.886029	0.79	0.79	0.79	0.79	0.79	0.0206284	0.79	0.79	0.79	0.79	0.79	0.819319	0.79	0
2100	460	0.822916	0.79	0.79	0.79	0.79	0.79	0.79	0.79	0.79	0.79	0.969636	0.886029	0.79	0.79	0.79	0.79	0.79	0.0206284	0.79	0.79	0.79	0.79	0.79	0.819319	0.79	0
2100	480	0.822916	0.79	0.79	0.79	0.79	0.79	0.79	0.79	0.79	0.79	0.969636	0.886029	0.79	0.79	0.79	0.79	0.79	0.0206284	0.79	0.79	0.79	0.79	0.79	0.819319	0.79	0
2100	500	0.822916	0.79	0.79	0.79	0.79	0.79	0.79	0.79	0.79	0.79	0.969636	0.886029	0.79	0.79	0.79	0.79	0.79	0.0206284	0.79	0.79	0.79	0.79	0.79	0.819319	0.79	0
2100	520	0.822916	0.79	0.79	0.79	0.79	0.79	0.79	0.79	0.79	0.79	0.969636	0.886029	0.79	0.79	0.79	0.79	0.79	0.0206284	0.79	0.79	0.79	0.79	0.79	0.819319	0.79	0
2100	540	0.822916	0.79	0.79	0.79	0.79	0.79	0.79	0.79	0.79	0.79	0.969636	0.886029	0.79	0.79	0.79	0.79	0.79	0.0206284	0.79	0.79	0.79	0.79	0.79	0.819319	0.79	0
2100	560	0.822916	0.79	0.79	0.79	0.79	0.79	0.79	0.79	0.79	0.79	0.969636	0.886029	0.79	0.79	0.79	0.79	0.79	0.0206284	0.79	0.79	0.79	0.79	0.79	0.819319	0.79	0
2100	580	0.822916	0.79	0.79	0.79	0.79	0.79	0.79	0.79	0.79	0.79	0.969636	0.886029	0.79	0.79	0.79	0.79	0.79	0.0206284	0.79	0.79	0.79	0.79	0.79	0.819319	0.79	0
2100	600	0.822916	0.79	0.79	0.79	0.79	0.79	0.79	0.79	0.79	0.79	0.969636	0.886029	0.79	0.79	0.79	0.79	0.79	0.0206284	0.79	0.79	0.79	0.79	0.79	0.819319	0.79	0
2100	620	0.822916	0.79	0.79	0.79	0.79	0.79	0.79	0.79	0.79	0.79	0.969636	0.886029	0.79	0.79	0.79	0.79	0.79	0.0206284	0.79	0.79	0.79	0.79	0.79	0.819319	0.79	0
2100	640	0.822916	0.79	0.79	0.79	0.79	0.79	0.79	0.79	0.79	0.79	0.969636	0.886029	0.79	0.79	0.79	0.79	0.79	0.0206284	0.79	0.79	0.79	0.79	0.79	0.819319	0.79	0
2100	660	0.822916	0.79	0.79	0.79	0.79	0.79	0.79	0.79	0.79	0.79	0.969636	0.886029	0.79	0.79	0.79	0.79	0.79	0.0206284	0.79	0.79	0.79	0.79	0.79	0.819319	0.79	0
2100	680	0.822916	0.79	0.79	0.79	0.79	0.79	0.79	0.79	0.79	0.79	0.969636	0.886029	0.79	0.79	0.79	0.79	0.79	0.79	0.79	0.79	0.79	0.79	0.79	0.819319	0.79	0
2100	700	0.822916	0.79	0.79	0.79	0.79	0.79	0.79	0.79	0.79	0.79	0.969636	0.886029	0.79	0.79	0.79	0.79	0.79	0.79	0.79	0.79	0.79	0.79	0.79	0.819319	0.79	0
2100	720	0.822916	0.79	0.79	0.79	0.79	0.79	0.79	0.79	0.79	0.79	0.969636	0.886029	0.79	0.79	0.79	0.79	0.79	0.79	0.79	0.79	0.79	0.79	0.79	0.819319	0.79	0
2100	740	0.822916	0.79	0.79	0.79	0.79	0.79	0.79	0.79	0.79	0.79	0.969636	0.886029	0.79	0.79	0.79	0.79	0.79	0.79	0.79	0.79	0.79	0.79	0.79	0.819319	0.79	0
2100	760	0.822916	0.79	0.79	0.79	0.79	0.79	0.79	0.79	0.79	0.79	0.969636	0.886029	0.79	0.79	0.79	0.79	0.79	0.79	0.79	0.79	0.79	0.79	0.79	0.819319	0.79	0
2100	780	0.822916	0.79	0.79	0.79	0.79	0.79	0.79	0.79	0.79	0.79	0.969636	0.886029	0.79	0.79	0.79	0.79	0.79	0.79	0.79	0.79	0.79	0.79	0.79	0.819319	0.79	0
2100	800	0.822916	0.79	0.79	0.79	0.79	0.79	0.79	0.79	0.79	0.79	0.969636	0.886029	0.79	0.79	0.79	0.79	0.79	0.79	0.79	0.79	0.79	0.79	0.79	0.819319	0.79	0
2100	820	0.961064	0.79	0.79	0.79	0.79	0.79	0.79	0.79	0.79	0.79	0.969636	0.886029	0.79	0.79	0.79	0.79	0.79	0.79	0.79	0.79	0.79	0.79	0.79	0.819319	0.79	0
2100	840	0.961064	0.79	0.79	0.79	0.79	0.79	0.79	0.79	0.79	0.79	0.969636	0.886029	0.79	0.79	0.79	0.79	0.79	0.79	0.79	0.79	0.79	0.79	0.79	0.819319	0.79	0
2100	860	0.961064	0.79	0.79	0.79	0.79	0.79	0.79	0.79	0.79	0.79	0.969636	0.886029	0.79	0.79	0.79	0.79	0.79	0.79	0.79	0.79	0.79	0.79	0.79	0.819319	0.79	0
2100	880	0.961064	0.79	0.79	0.79	0.79	0.79	0.79	0.79	0.79	0.79	0.969636	0.886029	0.79	0.79	0.79	0.79	0.79	0.79	0.79	0.79	0.79	0.79	0.79	0.819319	0.79	0
2100	900	0.961064	0.79	0.79	0.79	0.79	0.79	0.79	0.79	0.79	0.79	0.969636	0.886029	0.79	0.79	0.79	0.79	0.79	0.79	0.79	0.79	0.79	0.79	0.79	0.819319	0.79	0
2100	920	0.961064	0.79	0.79	0.79	0.79	0.79	0.79	0.79	0.79	0.79	0.969636	0.886029	0.79	0.79	0.79	0.79	0.79	0.79	0.79	0.79	0.79	0.79	0.79	0.819319	0.79	0
2100	940	0.961064	0.79	0.79	0.79	0.79	0.79	0.79	0.79	0.79	0.79	0.969636	0.886029	0.79	0.79	0.79	0.79	0.79	0.79	0.79	0.79	0.79	0.79	0.79	0.819319	0.79	0
2100	960	0.961064	0.79	0.79	0.79	0.79	0.79	0.79	0.79	0.79	0.79	0.969636	0.886029	0.79	0.79	0.79	0.79	0.79	0.79	0.79	0.79	0.79	0.79	0.79	0.819319	0.79	0
2100	980	0.961064	0.79	0.79	0.79	0.79	0.79	0.79	0.79	0.79	0.79	0.969636	0.886029	0.79	0.79	0.79	0.79	0.79	0.79	0.79	0.79	0.79	0.79	0.79	0.819319	0.79	0
2100	1000	0.961064	0.79	0.79	0.79	0.79	0.79	0.79	0.79	0.79	0.79	0.969636	0.886029	0.79	0.79	0.79	0.79	0.79	0.79	0.79	0.79	0.79	0.79	0.79	0.819319	0.79	0
2100	1020	0.961064	0.79	0.79	0.79	0.79	0.79	0.79	0.79	0.79	0.79	0.969636	0.886029	0.79	0.79	0.79	0.79	0.79	0.79	0.79	0.79	0.79	0.79	0.79	0.819319	0.79	0
2100	1040	0.961064	0.79	0.79	0.79	0.79	0.79	0.79	0.79	0.79	0.79	0.969636	0.886029	0.79	0.79	0.79	0.79	0.79	0.79	0.79	0.79	0.79	0.79	0.79	0.819319	0.79	0
2100	1060	0.961064	0.79	0.79	0.79	0.79	0.79	0.79	0.79	0.79	0.79	0.969636	0.886029	0.79	0.79	0.79	0.79	0.79	0.79	0.79	0.79	0.79	0.79	0.79	0.819319	0.79	0
2100	1080	0.961064	0.79	0.79	0.79	0.79	0.79	0.79	0.79	0.79	0.79	0.969636	0.886029	0.79	0.79	0.79	0.79	0.79	0.79	0.79	0.79	0.79	0.79	0.79	0.819319	0.79	0
2100	1100	0.961064	0.79	0.79	0.79	0.79	0.79	0.79	0.79	0.79	0.79	0.969636	0.886029	0.79	0.79	0.79	0.79	0.79	0.79	0.79	0.79	0.79	0.79	0.79	0.819319	0.79	0
2100	1120	0.961064	0.79	0.79	0.79	0.79	0.79	0.79	0.79	0.79	0.79	0.969636	0.886029	0.79	0.79	0.79	0.79	0.79	0.79	0.79	0.79	0.79	0.79	0.79	0.819319	0.79	0
2100	1140	0.961064	0.79	0.79	0.79	0.79	0.79	0.79	0.79	0.79	0.79	0.969636	0.886029	0.79	0.79	0.79	0.79	0.79	0.79	0.79	0.79	0.79	0.79	0.79	0.819319	0.79	0
2100	1160	0.961064	0.79	0.79	0.79	0.79	0.79	0.79	0.79	0.79	0.79	0.969636	0.886029	0.79	0.79	0.79	0.79	0.79	0.79	0.79	0.79	0.79	0.79	0.79	0.819319	0.79	0
2100	1180	0.961064	0.79	0.79	0.79	0.79	0.79	0.79	0.79	0.79	0.79	0.982323	0.886029	0.79	0.79	0.79	0.79	0.79	0.79	0.79	0.79	0.79	0.79	0.79	0.819319	0.79	0
2100	1200	0.961064	0.79	0.79	0.79	0.79	0.79	0.79	0.79	0.79	0.79	0.982323	0.886029	0.79	0.79	0.79	0.79	0.79	0.79	0.79	0.79	0.79	0.79	0.79	0.819319	0.79	0
2100	1220	0.961064	0.79	0.79	0.79	0.79	0.79	0.79	0.79	0.79	0.79	0.982323	0.886029	0.79	0.79	0.79	0.79	0.79	0.79	0.79	0.79	0.79	0.79	0.79	0.819319	0.79	0
2100	1240	0.961064	0.79	0.79	0.79	0.79	0.79	0.79	0.79	0.79	0.79	0.982323	0.886029	0.79	0.79	0.79	0.79	0.79	0.79	0.79	0.79	0.79	0.79	0.79	0.819319	0.79	0
2100	1260	0.961064	0.79	0.79	0.79	0.79	0.79	0.79	0.79	0.79	0.79	0.982323	0.886029	0.79	0.79	0.79	0.79	0.79	0.79	0.79	0.79	0.79	0.79	0.79	0.819319	0.79	0
2100	1280	0.961064	0.79	0.79	0.79	0.79	0.79	0.79	0.79	0.79	0.79	0.982323	0.886029	0.79	0.79	0.79	0.79	0.79	0.79	0.79	0.79	0.79	0.79	0.79	0.819319	0.79	0
2100	1300	0.961064	0.79	0.79	0.79	0.79	0.79	0.79	0.79	0.79	0.79	0.982323	0.886029	0.79	0.79	0.79	0.79	0.79	0.79	0.79	0.79	0.79	0.79	0.79	0.819319	0.79	0
2100	1320	0.961064	0.79	0.79	0.79	0.79	0.79	0.79	0.79	0.79	0.79	0.982323	0.886029	0.79	0.79	0.79	0.79	0.79	0.79	0.79	0.79	0.79	0.79	0.79	0.819319	0.79	0
2100	1340	0.961064	0.79	0.79	0.79	0.79	0.79	0.79	0.79	0.79	0.79	0.982323	0.886029	0.79	0.79	0.79	0.79	0.79	0.79	0.79	0.79	0.79	0.79	0.79	0.819319	0.79	0
2100	1360	0.961064	0.79	0.79	0.79	0.79	0.79	0.79	0.79	0.79	0.79	0.982323	0.886029	0.79	0.79	0.79	0.79	0.79	0.79	0.79	0.79	0.79	0.79	0.79	0.819319	0.79	0
2100	1380	0.961064	0.79	0.79	0.79	0.79	0.79	0.79	0.79	0.79	0.79	0.982323	0.886029	0.79	0.79	0.79	0.79	0.79	0.79	0.79	0.79	0.79	0.79	0.79	0.819319	0.79	0
2100	1400	0.961064	0.79	0.79	0.79	0.79	0.79	0.79	0.79	0.79	0.79	0.982323	0.886029	0.79	0.79	0.79	0.79	0.79	0.79	0.79	0.79	0.79	0.79	0.79	0.819319	0.79	0
2100	1420	0.961064	0.79	0.79	0.79	0.79	0.79	0.79	0.79	0.79	0.79	0.982323	0.886029	0.79	0.79	0.79	0.79	0.79	0.79	0.79	0.79	0.79	0.79	0.79	0.819319	0.79	0
2100	1440	0.961064	0.79	0.79	0.79	0.79	0.79	0.79	0.79	0.79	0.79	0.982323	0.886029	0.79	0.79	0.79	0.79	0.79	0.79	0.79	0.79	0.79	0.79	0.79	0.819319	0.79	0
2100	1460	0.961064	0.79	0.79	0.79	0.79	0.79	0.79	0.79	0.79	0.79	0.982323	0.886029	0.79	0.79	0.79	0.79	0.79	0.79	0.79	0.79	0.79	0.79	0.79	0.819319	0.79	0
2100	1480	0.961064	0.79	0.79	0.79	0.79	0.79	0.79	0.79	0.79	0.79	0.982323	0.886029	0.79	0.79	0.79	0.79	0.79	0.79	0.79	0.79	0.79	0.79	0.79	0.819319	0.79	0
2100	1500	0.961064	0.79	0.79	0.79	0.79	0.79	0.79	0.79	0.79	0.79	0.982323	0.886029	0.79	0.79	0.79	0.79	0.79	0.79	0.79	0.79	0.79	0.79	0.79	0.819319	0.79	0
2100	1520	0.961064	0.79	0.79	0.79	0.79	0.79	0.79	0.79	0.79	0.79	0.982323	0.886029	0.79	0.79	0.79	0.79	0.79	0.79	0.79	0.79	0.79	0.79	0.79	0.819319	0.79	0
2100	1540	0.961064	0.79	0.79	0.79	0.79	0.79	0.79	0.79	0.79	0.79	0.982323	0.886029	0.79	0.79	0.79	0.79	0.79	0.79	0.79	0.79	0.79	0.79	0.79	0.819319	0.79	0
2100	1560	0.961064	0.79	0.79	0.79	0.79	0.79	0.79	0.79	0.79	0.79	0.982323	0.886029	0.79	0.79	0.79	0.79	0.79	0.79	0.79	0.79	0.79	0.79	0.79	0.819319	0.79	0
2100	1580	0.961064	0.79	0.79	0.79	0.79	0.79	0.79	0.79	0.79	0.79	0.982323	0.886608	0.79	0.79	0.79	0.79	0.79	0.79	0.79	0.79	0.79	0.79	0.79	0.819319	0.79	0
2100	1600	0.961064	0.79	0.79	0.79	0.79	0.79	0.79	0.79	0.79	0.79	0.982323	0.886608	0.79	0.79	0.79	0.79	0.79	0.79	0.79	0.79	0.79	0.79	0.79	0.819319	0.79	0
2100	1620	0.961064	0.79	0.79	0.79	0.79	0.79	0.79	0.79	0.79	0.79	0.982323	0.886608	0.79	0.79	0.79	0.79	0.79	0.79	0.79	0.79	0.79	0.79	0.79	0.819319	0.79	0
2100	1640	0.961064	0.79	0.79	0.79	0.79	0.79	0.79	0.79	0.79	0.79	0.982323	0.886608	0.79	0.79	0.79	0.79	0.79	0.79	0.79	0.79	0.79	0.79	0.79	0.819319	0.79	0
2100	1660	0.961064	0.79	0.79	0.79	0.79	0.79	0.79	0.79	0.79	0.79	0.982323	0.886608	0.79	0.79	0.79	0.79	0.79	0.79	0.79	0.79	0.79	0.79	0.79	0.819319	0.79	0
2100	1680	0.961064	0.79	0.79	0.79	0.79	0.79	0.79	0.79	0.79	0.79	0.982323	0.886608	0.79	0.79	0.79	0.79	0.79	0.79	0.79	0.79	0.79	0.79	0.79	0.819319	0.79	0
2100	1700	0.961064	0.79	0.79	0.79	0.79	0.79	0.79	0.79	0.79	0.79	0.982323	0.886608	0.79	0.79	0.79	0.79	0.79	0.79	0.79	0.79	0.79	0.79	0.79	0.819319	0.79	0
2100	1720	0.961064	0.79	0.79	0.79	0.79	0.79	0.79	0.79	0.79	0.79	0.982323	0.886608	0.79	0.79	0.79	0.79	0.79	0.79	0.79	0.79	0.79	0.79	0.79	0.819319	0.79	0
2100	1740	0.961064	0.79	0.79	0.79	0.79	0.79	0.79	0.79	0.79	0.79	0.982323	0.886608	0.79	0.79	0.79	0.79	0.79	0.79	0.79	0.79	0.79	0.79	0.79	0.819319	0.79	0
2100	1760	0.961064	0.79	0.79	0.79	0.79	0.79	0.79	0.79	0.79	0.79	0.982323	0.886608	0.79	0.79	0.79	0.79	0.79	0.79	0.79	0.79	0.79	0.79	0.79	0.819319	0.79	0
2100	1780	0.961064	0.79	0.79	0.79	0.79	0.79	0.79	0.79	0.79	0.79	0.982323	0.886608	0.79	0.79	0.79	0.79	0.79	0.79	0.79	0.79	0.79	0.79	0.79	0.819319	0.79	0
2100	1800	0.961064	0.79	0.79	0.79	0.79	0.79	0.79	0.79	0.79	0.79	0.982323	0.886608	0.79	0.79	0.79	0.79	0.79	0.79	0.79	0.79	0.79	0.79	0.79	0.819319	0.79	0
2100	1820	0.961064	0.79	0.79	0.79	0.79	0.79	0.79	0.79	0.79	0.79	0.982323	0.886608	0.79	0.79	0.79	0.79	0.79	0.79	0.79	0.79	0.79	0.79	0.79	0.819319	0.79	0
2100	1840	0.961064	0.79	0.79	0.79	0.79	0.79	0.79	0.79	0.79	0.79	0.982323	0.886608	0.79	0.79	0.79	0.79	0.79	0.79	0.79	0.79	0.79	0.79	0.79	0.819319	0.79	0
2100	1860	0.961064	0.79	0.79	0.79	0.79	0.79	0.79	0.79	0.79	0.79	0.982323	0.886608	0.79	0.79	0.79	0.79	0.79	0.79	0.79	0.79	0.79	0.79	0.79	0.819319	0.79	0
2100	1880	0.961064	0.79	0.79	0.79	0.79	0.79	0.79	0.79	0.79	0.79	0.982323	0.886608	0.79	0.79	0.79	0.79	0.79	0.79	0.79	0.79	0.79	0.79	0.79	0.819319	0.79	0
2100	1900	0.961064	0.79	0.79	0.79	0.79	0.79	0.79	0.79	0.79	0.79	0.982323	0.886608	0.79	0.79	0.79	0.79	0.79	0.79	0.79	0.79	0.79	0.79	0.79	0.819319	0.79	0
2100	1920	0.961064	0.79	0.79	0.79	0.79	0.79	0.79	0.79	0.79	0.79	0.982323	0.886608	0.79	0.79	0.79	0.79	0.79	0.79	0.79	0.79	0.79	0.79	0.79	0.819319	0.79	0
2100	1940	0.961064	0.79	0.79	0.79	0.79	0.79	0.79	0.79	0.79	0.79	0.982323	0.886608	0.79	0.79	0.79	0.79	0.79	0.79	0.79	0.79	0.79	0.79	0.79	0.819319	0.79	0
2100	1960	0.961064	0.79	0.79	0.79	0.79	0.79	0.79	0.79	0.79	0.79	0.982323	0.886608	0.79	0.79	0.79	0.79	0.79	0.79	0.79	0.79	0.79	0.79	0.79	0.819319	0.79	0
2100	1980	0.961064	0.79	0.79	0.79	0.79	0.79	0.79	0.79	0.79	0.79	0.982323	0.886608	0.79	0.79	0.79	0.79	0.79	0.79	0.79	0.79	0.79	0.79	0.79	0.819319	0.79	0
2100	2000	0.961064	0.79	0.79	0.79	0.79	0.79	0.79	0.79	0.79	0.79	0.982323	0.886608	0.79	0.79	0.79	0.79	0.79	0.79	0.79	0.79	0.79	0.79	0.79	0.819319	0.79	0
2100	2020	0.961064	0.79	0.79	0.79	0.79	0.79	0.79	0.79	0.79	0.79	0.982323	0.886608	0.79	0.79	0.79	0.79	0.79	0.79	0.79	0.79	0.79	0.79	0.79	0.819319	0.79	0
2100	2040	0.961064	0.79	0.79	0.79	0.79	0.79	0.79	0.79	0.79	0.79	0.982323	0.886608	0.79	0.79	0.79	0.79	0.79	0.79	0.79	0.79	0.79	0.79	0.79	0.819319	0.79	0
2100	2060	0.961064	0.79	0.79	0.79	0.79	0.79	0.79	0.79	0.79	0.79	0.982323	0.886608	0.79	0.79	0.79	0.79	0.79	0.79	0.79	0.79	0.79	0.79	0.79	0.819319	0.79	0
2100	2080	0.961064	0.79	0.79	0.79	0.79	0.79	0.79	0.79	0.79	0.79	0.982323	0.886608	0.79	0.79	0.79	0.79	0.79	0.79	0.79	0.79	0.79	0.79	0.79	0.819319	0.79	0
2100	2100	0.961064	0.79	0.79	0.79	0.79	0.79	0.79	0.79	0.79	0.79	0.982323	0.886608	0.79	0.79	0.79	0.79	0.79	0.79	0.79	0.79	0.79	0.79	0.79	0.819319	0.79	0
2100	2120	0.961064	0.79	0.79	0.79	0.79	0.79	0.79	0.79	0.79	0.79	0.982323	0.886608	0.79	0.79	0.79	0.79	0.79	0.79	0.79	0.79	0.79	0.79	0.79	0.819319	0.79	0
2100	2140	0.961064	0.79	0.79	0.79	0.79	0.79	0.79	0.79	0.79	0.79	0.982323	0.886608	0.79	0.79	0.79	0.79	0.79	0.79	0.79	0.79	0.79	0.79	0.79	0.819319	0.79	0
2100	2160	0.961064	0.79	0.79	0.79	0.79	0.79	0.79	0.79	0.79	0.79	0.982323	0.886608	0.79	0.79	0.79	0.79	0.79	0.79	0.79	0.79	0.79	0.79	0.79	0.819319	0.79	0
2100	2180	0.961064	0.79	0.79	0.79	0.79	0.79	0.79	0.79	0.79	0.79	0.982323	0.886608	0.79	0.79	0.79	0.79	0.79	0.79	0.79	0.79	0.79	0.79	0.79	0.819319	0.79	0
2100	2200	0.961064	0.79	0.79	0.79	0.79	0.79	0.79	0.79	0.79	0.79	0.982323	0.886608	0.79	0.79	0.79	0.79	0.79	0.79	0.79	0.79	0.79	0.79	0.79	0.819319	0.79	0
2100	2220	0.961064	0.79	0.79	0.79	0.79	0.79	0.79	0.79	0.79	0.79	0.982323	0.886608	0.79	0.79	0.79	0.79	0.79	0.79	0.79	0.79	0.79	0.79	0.79	0.819319	0.79	0
2100	2240	0.961064	0.79	0.79	0.79	0.79	0.79	0.79	0.79	0.79	0.79	0.982323	0.886608	0.79	0.79	0.79	0.79	0.79	0.79	0.79	0.79	0.79	0.79	0.79	0.819319	0.79	0
2100	2260	0.961064	0.79	0.79	0.79	0.79	0.79	0.79	0.79	0.79	0.79	0.982323	0.886608	0.79	0.79	0.79	0.79	0.79	0.79	0.79	0.79	0.79	0.79	0.79	0.819319	0.79	0
2100	2280	0.961064	0.79	0.79	0.79	0.79	0.79	0.79	0.79	0.79	0.79	0.982323	0.886608	0.79	0.79	0.79	0.79	0.79	0.79	0.79	0.79	0.79	0.79	0.79	0.819319	0.79	0
2100	2300	0.961064	0.79	0.79	0.79	0.79	0.79	0.79	0.79	0.79	0.79	0.982323	0.886608	0.79	0.79	0.79	0.79	0.79	0.79	0.79	0.79	0.79	0.79	0.79	0.819319	0.79	0
2100	2320	0.961064	0.79	0.79	0.79	0.79	0.79	0.79	0.79	0.79	0.79	0.982323	0.886608	0.79	0.79	0.79	0.79	0.79	0.79	0.79	0.79	0.79	0.79	0.79	0.819319	0.79	0
2100	2340	0.961064	0.79	0.79	0.79	0.79	0.79	0.79	0.79	0.79	0.79	0.982323	0.886608	0.79	0.79	0.79	0.79	0.79	0.79	0.79	0.79	0.79	0.79	0.79	0.819319	0.79	0
2100	2360	0.961064	0.79	0.79	0.79	0.79	0.79	0.79	0.79	0.79	0.79	0.982323	0.886608	0.79	0.79	0.79	0.79	0.79	0.79	0.79	0.79	0.79	0.79	0.79	0.819319	0.79	0
2100	2380	0.961064	0.79	0.79	0.79	0.79	0.79	0.79	0.79	0.79	0.79	0.982323	0.886608	0.79	0.79	0.79	0.79	0.79	0.79	0.79	0.79	0.79	0.79	0.79	0.819319	0.79	0
2100	2400	0.961064	0.79	0.79	0.79	0.79	0.79	0.79	0.79	0.79	0.79	0.982323	0.886608	0.79	0.79	0.79	0.79	0.79	0.79	0.79	0.79	0.79	0.79	0.79	0.819319	0.79	0
2100	2420	0.961064	0.79	0.79	0.79	0.79	0.79	0.79	0.79	0.79	0.79	0.982323	0.886608	0.79	0.79	0.79	0.79	0.79	0.79	0.79	0.79	0.79	0.79	0.79	0.819319	0.79	0
2100	2440	0.961064	0.79	0.79	0.79	0.79	0.79	0.79	0.79	0.79	0.79	0.982323	0.886608	0.79	0.79	0.79	0.79	0.79	0.79	0.79	0.79	0.79	0.79	0.79	0.819319	0.79	0
2100	2460	0.961064	0.79	0.79	0.79	0.79	0.79	0.79	0.79	0.79	0.79	0.982323	0.886608	0.79	0.79	0.79	0.79	0.79	0.79	0.79	0.79	0.79	0.79	0.79	0.819319	0.79	0
2100	2480	0.961064	0.79	0.79	0.79	0.79	0.79	0.79	0.79	0.79	0.79	0.982323	0.886608	0.79	0.79	0.79	0.79	0.79	0.79	0.79	0.79	0.79	0.79	0.79	0.819319	0.79	0
2100	2500	0.961064	0.79	0.79	0.79	0.79	0.79	0.79	0.79	0.79	0.79	0.982323	0.886608	0.79	0.79	0.79	0.79	0.79	0.79	0.79	0.79	0.79	0.79	0.79	0.819319	0.79	0
2100	2520	0.961064	0.79	0.79	0.79	0.79	0.79	0.79	0.79	0.79	0.79	0.982323	0.886608	0.79	0.79	0.79	0.79	0.79	0.79	0.79	0.79	0.79	0.79	0.79	0.819319	0.79	0
2100	2540	0.961064	0.79	0.79	0.79	0.79	0.79	0.79	0.79	0.79	0.79	0.982323	0.886608	0.79	0.79	0.79	0.79	0.79	0.79	0.79	0.79	0.79	0.79	0.79	0.819319	0.79	0
2100	2560	0.961064	0.79	0.79	0.79	0.79	0.79	0.79	0.79	0.79	0.79	0.982323	0.886608	0.79	0.79	0.79	0.79	0.79	0.79	0.79	0.79	0.79	0.79	0.79	0.819319	0.79	0
2100	2580	0.961064	0.79	0.79	0.79	0.79	0.79	0.79	0.79	0.79	0.79	0.982323	0.886608	0.79	0.79	0.79	0.79	0.79	0.79	0.79	0.79	0.79	0.79	0.79	0.819319	0.79	0
2100	2600	0.961064	0.79	0.79	0.79	0.79	0.79	0.79	0.79	0.79	0.79	0.982323	0.886608	0.79	0.79	0.79	0.79	0.79	0.79	0.79	0.79	0.79	0.79	0.79	0.819319	0.79	0
2100	2620	0.961064	0.79	0.79	0.79	0.79	0.79	0.79	0.79	0.79	0.79	0.982323	0.886608	0.79	0.79	0.79	0.79	0.79	0.79	0.79	0.79	0.79	0.79	0.79	0.819319	0.79	0
2100	2640	0.961064	0.79	0.79	0.79	0.79	0.79	0.79	0.79	0.79	0.79	0.982323	0.886608	0.79	0.79	0.79	0.79	0.79	0.79	0.79	0.79	0.79	0.79	0.79	0.819319	0.79	0
2100	2660	0.961064	0.79	0.79	0.79	0.79	0.79	0.79	0.79	0.79	0.79	0.982323	0.886608	0.79	0.79	0.79	0.79	0.79	0.79	0.79	0.79	0.79	0.79	0.79	0.819319	0.79	0
2100	2680	0.961064	0.79	0.79	0.79	0.79	0.79	0.79	0.79	0.79	0.79	0.982323	0.886608	0.79	0.79	0.79	0.79	0.79	0.79	0.79	0.79	0.79	0.79	0.79	0.819319	0.79	0
2100	2700	0.961064	0.79	0.79	0.79	0.79	0.79	0.79	0.79	0.79	0.79	0.982323	0.886608	0.79	0.79	0.79	0.79	0.79	0.79	0.79	0.79	0.79	0.79	0.79	0.819319	0.79	0
2100	2720	0.961064	0.79	0.79	0.79	0.79	0.79	0.79	0.79	0.79	0.79	0.982323	0.886608	0.79	0.79	0.79	0.79	0.79	0.79	0.79	0.79	0.79	0.79	0.79	0.819319	0.79	0
2100	2740	0.961064	0.79	0.79	0.79	0.79	0.79	0.79	0.79	0.79	0.79	0.982323	0.886608	0.79	0.79	0.79	0.79	0.79	0.79	0.79	0.79	0.79	0.79	0.79	0.819319	0.79	0
2100	2760	0.961064	0.79	0.79	0.79	0.79	0.79	0.79	0.79	0.79	0.79	0.982323	0.886608	0.79	0.79	0.79	0.79	0.79	0.79	0.79	0.79	0.79	0.79	0.79	0.819319	0.79	0
2100	2780	0.961064	0.79	0.79	0.79	0.79	0.79	0.79	0.79	0.79	0.79	0.982323	0.886608	0.79	0.79	0.79	0.79	0.79	0.79	0.79	0.79	0.79	0.79	0.79	0.819319	0.79	0
2100	2800	0.961064	0.79	0.79	0.79	0.79	0.79	0.79	0.79	0.79	0.79	0.982323	0.886608	0.79	0.79	0.79	0.79	0.79	0.79	0.79	0.79	0.79	0.79	0.79	0.819319	0.79	0
2100	2820	0.961064	0.79	0.79	0.79	0.79	0.79	0.79	0.79	0.79	0.79	0.982323	0.886608	0.79	0.79	0.79	0.79	0.79	0.79	0.79	0.79	0.79	0.79	0.79	0.819319	0.79	0
2100	2840	0.961064	0.79	0.79	0.79	0.79	0.79	0.79	0.79	0.79	0.79	0.982323	0.886608	0.79	0.79	0.79	0.79	0.79	0.79	0.79	0.79	0.79	0.79	0.79	0.819319	0.79	0
2100	2860	0.961064	0.79	0.79	0.79	0.79	0.79	0.79	0.79	0.79	0.79	0.982323	0.886608	0.79	0.79	0.79	0.79	0.79	0.79	0.79	0.79	0.79	0.79	0.79	0.819319	0.79	0
2100	2880	0.961064	0.79	0.79	0.79	0.79	0.79	0.79	0.79	0.79	0.79	0.982323	0.886608	0.79	0.79	0.79	0.79	0.79	0.79	0.79	0.79	0.79	0.79	0.79	0.819319	0.79	0
2100	2900	0.961064	0.79	0.79	0.79	0.79	0.79	0.79	0.79	0.79	0.79	0.982323	0.886608	0.79	0.79	0.79	0.79	0.79	0.79	0.79	0.79	0.79	0.79	0.79	0.819319	0.79	0
2100	2920	0.961064	0.79	0.79	0.79	0.79	0.79	0.79	0.79	0.79	0.79	0.982323	0.886608	0.79	0.79	0.79	0.79	0.79	0.79	0.79	0.79	0.79	0.79	0.79	0.819319	0.79	0
2100	2940	0.961064	0.79	0.79	0.79	0.79	0.79	0.79	0.79	0.79	0.79	0.982323	0.886608	0.79	0.79	0.79	0.79	0.79	0.79	0.79	0.79	0.79	0.79	0.79	0.819319	0.79	0
2100	2960	0.961064	0.79	0.79	0.79	0.79	0.79	0.79	0.79	0.79	0.79	0.982323	0.886608	0.79	0.79	0.79	0.79	0.79	0.79	0.79	0.79	0.79	0.79	0.79	0.819319	0.79	0
2100	2980	0.961064	0.79	0.79	0.79	0.79	0.79	0.79	0.79	0.79	0.79	0.982323	0.886608	0.79	0.79	0.79	0.79	0.79	0.79	0.79	0.79	0.79	0.79	0.79	0.819319	0.79	0
2100	3000	0.961064	0.79	0.79	0.79	0.79	0.79	0.79	0.79	0.79	0.79	0.982323	0.886608	0.79	0.79	0.79	0.79	0.79	0.79	0.79	0.79	0.79	0.79	0.79	0.819319	0.79	0
2100	3020	0.961064	0.79	0.79	0.79	0.79	0.79	0.79	0.79	0.79	0.79	0.982323	0.886608	0.79	0.79	0.79	0.79	0.79	0.79	0.79	0.79	0.79	0.79	0.79	0.819319	0.79	0
2100	3040	0.961064	0.79	0.79	0.79	0.79	0.79	0.79	0.79	0.79	0.79	0.982323	0.886608	0.79	0.79	0.79	0.79	0.79	0.79	0.79	0.79	0.79	0.79	0.79	0.819319	0.79	0
2100	3060	0.961064	0.79	0.79	0.79	0.79	0.79	0.79	0.79	0.79	0.79	0.982323	0.886608	0.79	0.79	0.79	0.79	0.79	0.79	0.79	0.79	0.79	0.79	0.79	0.819319	0.79	0
2100	3080	0.961064	0.79	0.79	0.79	0.79	0.79	0.79	0.79	0.79	0.79	0.982323	0.886608	0.79	0.79	0.79	0.79	0.79	0.79	0.79	0.79	0.79	0.79	0.79	0.819319	0.79	0
2100	3100	0.961064	0.79	0.79	0.79	0.79	0.79	0.79	0.79	0.79	0.79	0.982323	0.886608	0.79	0.79	0.79	0.79	0.79	0.79	0.79	0.79	0.79	0.79	0.79	0.819319	0.79	0
2100	3120	0.961064	0.79	0.79	0.79	0.79	0.79	0.79	0.79	0.79	0.79	0.982323	0.886608	0.79	0.79	0.79	0.79	0.79	0.79	0.79	0.79	0.79	0.79	0.79	0.819319	0.79	0
2100	3140	0.961064	0.79	0.79	0.79	0.79	0.79	0.79	0.79	0.79	0.79	0.982323	0.886608	0.79	0.79	0.79	0.79	0.79	0.79	0.79	0.79	0.79	0.79	0.79	0.819319	0.79	0
2100	3160	0.961064	0.79	0.79	0.79	0.79	0.79	0.79	0.79	0.79	0.79	0.982323	0.886608	0.79	0.79	0.79	0.79	0.79	0.79	0.79	0.79	0.79	0.79	0.79	0.819319	0.79	0
2100	3180	0.961064	0.79	0.79	0.79	0.79	0.79	0.79	0.79	0.79	0.79	0.982323	0.886608	0.79	0.79	0.79	0.79	0.79	0.79	0.79	0.79	0.79	0.79	0.79	0.819319	0.79	0
2100	3200	0.961064	0.79	0.79	0.79	0.79	0.79	0.79	0.79	0.79	0.79	0.982323	0.886608	0.79	0.79	0.79	0.79	0.79	0.79	0.79	0.79	0.79	0.79	0.79	0.819319	0.79	0
2100	3220	0.961064	0.79	0.79	0.79	0.79	0.79	0.79	0.79	0.79	0.79	0.982323	0.886608	0.79	0.79	0.79	0.79	0.79	0.79	0.79	0.79	0.79	0.79	0.79	0.819319	0.79	0
2100	3240	0.961064	0.79	0.79	0.79	0.79	0.79	0.79	0.79	0.79	0.79	0.982323	0.886608	0.79	0.79	0.79	0.79	0.79	0.79	0.79	0.79	0.79	0.79	0.79	0.819319	0.79	0
2100	3260	0.961064	0.79	0.79	0.79	0.79	0.79	0.79	0.79	0.79	0.79	0.982323	0.886608	0.79	0.79	0.79	0.79	0.79	0.79	0.79	0.79	0.79	0.79	0.79	0.819319	0.79	0
2100	3280	0.961064	0.79	0.79	0.79	0.79	0.79	0.79	0.79	0.79	0.79	0.982323	0.886608	0.79	0.79	0.79	0.79	0.79	0.79	0.79	0.79	0.79	0.79	0.79	0.819319	0.79	0
2100	3300	0.961064	0.79	0.79	0.79	0.79	0.79	0.79	0.79	0.79	0.79	0.982323	0.886608	0.79	0.79	0.79	0.79	0.79	0.79	0.79	0.79	0.79	0.79	0.79	0.819319	0.79	0
2100	3320	0.961064	0.79	0.79	0.79	0.79	0.79	0.79	0.79	0.79	0.79	0.982323	0.886608	0.79	0.79	0.79	0.79	0.79	0.79	0.79	0.79	0.79	0.79	0.79	0.819319	0.79	0
2100	3340	0.961064	0.79	0.79	0.79	0.79	0.79	0.79	0.79	0.79	0.79	0.982323	0.886608	0.79	0.79	0.79	0.79	0.79	0.79	0.79	0.79	0.79	0.79	0.79	0.819319	0.79	0
2100	3360	0.961064	0.79	0.79	0.79	0.79	0.79	0.79	0.79	0.79	0.79	0.982323	0.886608	0.79	0.79	0.79	0.79	0.79	0.79	0.79	0.79	0.79	0.79	0.79	0.819319	0.79	0
2100	3380	0.961064	0.79	0.79	0.79	0.79	0.79	0.79	0.79	0.79	0.79	0.982323	0.886608	0.79	0.79	0.79	0.79	0.79	0.79	0.79	0.79	0.79	0.79	0.79	0.819319	0.79	0
2100	3400	0.961064	0.79	0.79	0.79	0.79	0.79	0.79	0.79	0.79	0.79	0.982323	0.886608	0.79	0.79	0.79	0.79	0.79	0.79	0.79	0.79	0.79	0.79	0.79	0.819319	0.79	0
2100	3420	0.961064	0.79	0.79	0.79	0.79	0.79	0.79	0.79	0.79	0.79	0.982323	0.886608	0.79	0.79	0.79	0.79	0.79	0.79	0.79	0.79	0.79	0.79	0.79	0.819319	0.79	0
2100	3440	0.961064	0.79	0.79	0.79	0.79	0.79	0.79	0.79	0.79	0.79	0.982323	0.886608	0.79	0.79	0.79	0.79	0.79	0.79	0.79	0.79	0.79	0.79	0.79	0.819319	0.79	0
2100	3460	0.961064	0.79	0.79	0.79	0.79	0.79	0.79	0.79	0.79	0.79	0.982323	0.886608	0.79	0.79	0.79	0.79	0.79	0.79	0.79	0.79	0.79	0.79	0.79	0.819319	0.79	0
2100	3480	0.961064	0.79	0.79	0.79	0.79	0.79	0.79	0.79	0.79	0.79	0.982323	0.886608	0.79	0.79	0.79	0.79	0.79	0.79	0.79	0.79	0.79	0.79	0.79	0.819319	0.79	0
2100	3500	0.961064	0.79	0.79	0.79	0.79	0.79	0.79	0.79	0.79	0.79	0.982323	0.886608	0.79	0.79	0.79	0.79	0.79	0.79	0.79	0.79	0.79	0.79	0.79	0.819319	0.79	0
2100	3520	0.961064	0.79	0.79	0.79	0.79	0.79	0.79	0.79	0.79	0.79	0.982323	0.886608	0.79	0.79	0.79	0.79	0.79	0.79	0.79	0.79	0.79	0.79	0.79	0.819319	0.79	0.79
2100	3540	0.961064	0.79	0.79	0.79	0.79	0.79	0.79	0.79	0.79	0.79	0.982323	0.886608	0.79	0.79	0.79	0.79	0.79	0.79	0.79	0.79	0.79	0.79	0.79	0.819319	0.79	0.79
2100	3560	0.961064	0.79	0.79	0.79	0.79	0.79	0.79	0.79	0.79	0.79	0.982323	0.886608	0.79	0.79	0.79	0.79	0.79	0.79	0.79	0.79	0.79	0.79	0.79	0.819319	0.79	0.79
2100	3580	0.961064	0.79	0.79	0.79	0.79	0.79	0.79	0.79	0.79	0.79	0.982323	0.886608	0.79	0.79	0.79	0.79	0.79	0.79	0.79	0.79	0.79	0.79	0.79	0.819319	0.79	0.79
2100	3600	0.961064	0.79	0.79	0.79	0.79	0.79	0.79	0.79	0.79	0.79	0.982323	0.886608	0.79	0.79	0.79	0.79	0.79	0.79	0.79	0.79	0.79	0.79	0.79	0.819319	0.79	0.79
2100	3620	0.961064	0.79	0.79	0.79	0.79	0.79	0.79	0.79	0.79	0.79	0.982323	0.886608	0.79	0.79	0.79	0.79	0.79	0.79	0.79	0.79	0.79	0.79	0.79	0.819319	0.79	0.79
2100	3640	0.961064	0.79	0.79	0.79	0.79	0.79	0.79	0.79	0.79	0.79	0.982323	0.886608	0.79	0.79	0.79	0.79	0.79	0.79	0.79	0.79	0.79	0.79	0.79	0.819319	0.79	0.79
2100	3660	0.961064	0.79	0.79	0.79	0.79	0.79	0.79	0.79	0.79	0.79	0.982323	0.886608	0.79	0.79	0.79	0.79	0.79	0.79	0.79	0.79	0.79	0.79	0.79	0.819319	0.79	0.79
2100	3680	0.961064	0.79	0.79	0.79	0.79	0.79	0.79	0.79	0.79	0.79	0.982323	0.886608	0.79	0.79	0.79	0.79	0.79	0.79	0.79	0.79	0.79	0.79	0.79	0.819319	0.79	0.79
2100	3700	0.961064	0.79	0.79	0.79	0.79	0.79	0.79	0.79	0.79	0.79	0.982323	0.886608	0.79	0.79	0.79	0.79	0.79	0.79	0.79	0.79	0.79	0.79	0.79	0.819319	0.79	0.79
2100	3720	0.961064	0.79	0.79	0.79	0.79	0.79	0.79	0.79	0.79	0.79	0.982323	0.886608	0.79	0.79	0.79	0.79	0.79	0.79	0.79	0.79	0.79	0.79	0.79	0.819319	0.79	0.79
2100	3740	0.961064	0.79	0.79	0.79	0.79	0.79	0.79	0.79	0.79	0.79	0.982323	0.886608	0.79	0.79	0.79	0.79	0.79	0.79	0.79	0.79	0.79	0.79	0.79	0.819319	0.79	0.79
2100	3760	0.961064	0.79	0.79	0.79	0.79	0.79	0.79	0.79	0.79	0.79	0.982323	0.886608	0.79	0.79	0.79	0.79	0.79	0.79	0.79	0.79	0.79	0.79	0.79	0.819319	0.79	0.79
2100	3780	0.961064	0.79	0.79	0.79	0.79	0.79	0.79	0.79	0.79	0.79	0.982323	0.886608	0.79	0.79	0.79	0.79	0.79	0.79	0.79	0.79	0.79	0.79	0.79	0.819319	0.79	0.79
2100	3800	0.961064	0.79	0.79	0.79	0.79	0.79	0.79	0.79	0.79	0.79	0.982323	0.886608	0.79	0.79	0.79	0.79	0.79	0.79	0.79	0.79	0.79	0.79	0.79	0.819319	0.79	0.79
2100	3820	0.961064	0.79	0.79	0.79	0.79	0.79	0.79	0.79	0.79	0.79	0.982323	0.886608	0.79	0.79	0.79	0.79	0.79	0.79	0.79	0.79	0.79	0.79	0.79	0.819319	0.79	0.79
2100	3840	0.961064	0.79	0.79	0.79	0.79	0.79	0.79	0.79	0.79	0.79	0.982323	0.886608	0.79	0.79	0.79	0.79	0.79	0.79	0.79	0.79	0.79	0.79	0.79	0.819319	0.79	0.79
2100	3860	0.961064	0.79	0.79	0.79	0.79	0.79	0.79	0.79	0.79	0.79	0.982323	0.886608	0.79	0.79	0.79	0.79	0.79	0.79	0.79	0.79	0.79	0.79	0.79	0.819319	0.79	0.79
2100	3880	0.961064	0.79	0.79	0.79	0.79	0.79	0.79	0.79	0.79	0.79	0.982323	0.886608	0.79	0.79	0.79	0.79	0.79	0.79	0.79	0.79	0.79	0.79	0.79	0.819319	0.79	0.79
2100	3900	0.961064	0.79	0.79	0.79	0.79	0.79	0.79	0.79	0.79	0.79	0.982323	0.886608	0.79	0.79	0.79	0.79	0.79	0.79	0.79	0.79	0.79	0.79	0.79	0.819319	0.79	0.79
2100	3920	0.961064	0.79	0.79	0.79	0.79	0.79	0.79	0.79	0.79	0.79	0.982323	0.886608	0.79	0.79	0.79	0.79	0.79	0.79	0.79	0.79	0.79	0.79	0.79	0.819319	0.79	0.79
2100	3940	0.961064	0.79	0.79	0.79	0.79	0.79	0.79	0.79	0.79	0.79	0.982323	0.886608	0.79	0.79	0.79	0.79	0.79	0.79	0.79	0.79	0.79	0.79	0.79	0.819319	0.79	0.79
2100	3960	0.961064	0.79	0.79	0.79	0.79	0.79	0.79	0.79	0.79	0.79	0.982323	0.886608	0.79	0.79	0.79	0.79	0.79	0.79	0.79	0.79	0.79	0.79	0.79	0.819319	0.79	0.79
2100	3980	0.961064	0.79	0.79	0.79	0.79	0.79	0.79	0.79	0.79	0.79	0.982323	0.886608	0.79	0.79	0.79	0.79	0.79	0.79	0.79	0.79	0.79	0.79	0.79	0.819319	0.79	0.79
2100	4000	0.961064	0.79	0.79	0.79	0.79	0.79	0.79	0.79	0.79	0.79	0.982323	0.886608	0.79	0.79	0.79	0.79	0.79	0.79	0.79	0.79	0.79	0.79	0.79	0.819319	0.79	0.79

## Sheet: CH4_entf_D
t	Implementation costs	Canada	USA	Mexico	Central America	Brazil	Rest of South-America	North Africa	West Africa	East Africa	South Africa	West Europe	Central Europe	Turkey	Ukraine	Kazachstan	Russia	Middle East	India	Korea	China+	South East Asia	Indonesia	Japan	Oceania	Rest of South Asia	Rest of South Africa
2020	0	0	0	0	0	0	0	0	0	0	0	0	0	0	0	0	0	0	0	0	0	0	0	0	0	0	0
2020	20	0.026083	0.026083	0.026083	0.026083	0.026083	0.026083	0.0127252	0.0127252	0.0127252	0.0127252	0.026083	0.026083	0.0127252	0.0127252	0.0127252	0.0211825	0.0127252	0.0127252	0.0127252	0.0211825	0.0127252	0.0127252	0.026083	0.026083	0.0127252	0.0127252
2020	40	0.0273843	0.0273843	0.0273843	0.0273843	0.0273843	0.0273843	0.0135699	0.0135699	0.0135699	0.0135699	0.0273843	0.0273843	0.0135699	0.0135699	0.0135699	0.0222354	0.0135699	0.0135699	0.0135699	0.0222354	0.0135699	0.0135699	0.0273843	0.0273843	0.0135699	0.0135699
2020	60	0.0290885	0.0290885	0.0290885	0.0290885	0.0290885	0.0290885	0.0144768	0.0144768	0.0144768	0.0144768	0.0290885	0.0290885	0.0144768	0.0144768	0.0144768	0.0237895	0.0144768	0.0144768	0.0144768	0.0237895	0.0144768	0.0144768	0.0290885	0.0290885	0.0144768	0.0144768
2020	80	0.0311863	0.0311863	0.0311863	0.0311863	0.0311863	0.0311863	0.0154235	0.0154235	0.0154235	0.0154235	0.0311863	0.0311863	0.0154235	0.0154235	0.0154235	0.0253305	0.0154235	0.0154235	0.0154235	0.0253305	0.0154235	0.0154235	0.0311863	0.0311863	0.0154235	0.0154235
2020	100	0.033351	0.033351	0.033351	0.033351	0.033351	0.033351	0.0161241	0.0161241	0.0161241	0.0161241	0.033351	0.033351	0.0161241	0.0161241	0.0161241	0.0269493	0.0161241	0.0161241	0.0161241	0.0269493	0.0161241	0.0161241	0.033351	0.033351	0.0161241	0.0161241
2020	120	0.0350452	0.0350452	0.0350452	0.0350452	0.0350452	0.0350452	0.0173654	0.0173654	0.0173654	0.0173654	0.0350452	0.0350452	0.0173654	0.0173654	0.0173654	0.0282387	0.0173654	0.0173654	0.0173654	0.0282387	0.0173654	0.0173654	0.0350452	0.0350452	0.0173654	0.0173654
2020	140	0.0370957	0.0370957	0.0370957	0.0370957	0.0370957	0.0370957	0.0181106	0.0181106	0.0181106	0.0181106	0.0370957	0.0370957	0.0181106	0.0181106	0.0181106	0.0296516	0.0181106	0.0181106	0.0181106	0.0296516	0.0181106	0.0181106	0.0370957	0.0370957	0.0181106	0.0181106
2020	160	0.0390612	0.0390612	0.0390612	0.0390612	0.0390612	0.0390612	0.0187841	0.0187841	0.0187841	0.0187841	0.0390612	0.0390612	0.0187841	0.0187841	0.0187841	0.031192	0.0187841	0.0187841	0.0187841	0.031192	0.0187841	0.0187841	0.0390612	0.0390612	0.0187841	0.0187841
2020	180	0.0407815	0.0407815	0.0407815	0.0407815	0.0407815	0.0407815	0.0200285	0.0200285	0.0200285	0.0200285	0.0407815	0.0407815	0.0200285	0.0200285	0.0200285	0.0327271	0.0200285	0.0200285	0.0200285	0.0327271	0.0200285	0.0200285	0.0407815	0.0407815	0.0200285	0.0200285
2020	200	0.0425178	0.0425178	0.0425178	0.0425178	0.0425178	0.0425178	0.0208509	0.0208509	0.0208509	0.0208509	0.0425178	0.0425178	0.0208509	0.0208509	0.0208509	0.0342066	0.0208509	0.0208509	0.0208509	0.0342066	0.0208509	0.0208509	0.0425178	0.0425178	0.0208509	0.0208509
2020	220	0.0436459	0.0436459	0.0436459	0.0436459	0.0436459	0.0436459	0.0211128	0.0211128	0.0211128	0.0211128	0.0436459	0.0436459	0.0211128	0.0211128	0.0211128	0.0350123	0.0211128	0.0211128	0.0211128	0.0350123	0.0211128	0.0211128	0.0436459	0.0436459	0.0211128	0.0211128
2020	240	0.0437607	0.0437607	0.0437607	0.0437607	0.0437607	0.0437607	0.02116	0.02116	0.02116	0.02116	0.0437607	0.0437607	0.02116	0.02116	0.02116	0.0351172	0.02116	0.02116	0.02116	0.0351172	0.02116	0.02116	0.0437607	0.0437607	0.02116	0.02116
2020	260	0.0438084	0.0438084	0.0438084	0.0438084	0.0438084	0.0438084	0.0212018	0.0212018	0.0212018	0.0212018	0.0438084	0.0438084	0.0212018	0.0212018	0.0212018	0.0352437	0.0212018	0.0212018	0.0212018	0.0352437	0.0212018	0.0212018	0.0438084	0.0438084	0.0212018	0.0212018
2020	280	0.0439411	0.0439411	0.0439411	0.0439411	0.0439411	0.0439411	0.0212657	0.0212657	0.0212657	0.0212657	0.0439411	0.0439411	0.0212657	0.0212657	0.0212657	0.0353488	0.0212657	0.0212657	0.0212657	0.0353488	0.0212657	0.0212657	0.0439411	0.0439411	0.0212657	0.0212657
2020	300	0.0440764	0.0440764	0.0440764	0.0440764	0.0440764	0.0440764	0.0213334	0.0213334	0.0213334	0.0213334	0.0440764	0.0440764	0.0213334	0.0213334	0.0213334	0.0354876	0.0213334	0.0213334	0.0213334	0.0354876	0.0213334	0.0213334	0.0440764	0.0440764	0.0213334	0.0213334
2020	320	0.0441325	0.0441325	0.0441325	0.0441325	0.0441325	0.0441325	0.0214042	0.0214042	0.0214042	0.0214042	0.0441325	0.0441325	0.0214042	0.0214042	0.0214042	0.0355171	0.0214042	0.0214042	0.0214042	0.0355171	0.0214042	0.0214042	0.0441325	0.0441325	0.0214042	0.0214042
2020	340	0.0442266	0.0442266	0.0442266	0.0442266	0.0442266	0.0442266	0.0214312	0.0214312	0.0214312	0.0214312	0.0442266	0.0442266	0.0214312	0.0214312	0.0214312	0.0355618	0.0214312	0.0214312	0.0214312	0.0355618	0.0214312	0.0214312	0.0442266	0.0442266	0.0214312	0.0214312
2020	360	0.0443452	0.0443452	0.0443452	0.0443452	0.0443452	0.0443452	0.0214535	0.0214535	0.0214535	0.0214535	0.0443452	0.0443452	0.0214535	0.0214535	0.0214535	0.0357431	0.0214535	0.0214535	0.0214535	0.0357431	0.0214535	0.0214535	0.0443452	0.0443452	0.0214535	0.0214535
2020	380	0.0444163	0.0444163	0.0444163	0.0444163	0.0444163	0.0444163	0.0215404	0.0215404	0.0215404	0.0215404	0.0444163	0.0444163	0.0215404	0.0215404	0.0215404	0.0359138	0.0215404	0.0215404	0.0215404	0.0359138	0.0215404	0.0215404	0.0444163	0.0444163	0.0215404	0.0215404
2020	400	0.0445232	0.0445232	0.0445232	0.0445232	0.0445232	0.0445232	0.0215568	0.0215568	0.0215568	0.0215568	0.0445232	0.0445232	0.0215568	0.0215568	0.0215568	0.0360682	0.0215568	0.0215568	0.0215568	0.0360682	0.0215568	0.0215568	0.0445232	0.0445232	0.0215568	0.0215568
2020	420	0.0446339	0.0446339	0.0446339	0.0446339	0.0446339	0.0446339	0.0216426	0.0216426	0.0216426	0.0216426	0.0446339	0.0446339	0.0216426	0.0216426	0.0216426	0.0361855	0.0216426	0.0216426	0.0216426	0.0361855	0.0216426	0.0216426	0.0446339	0.0446339	0.0216426	0.0216426
2020	440	0.0449059	0.0449059	0.0449059	0.0449059	0.0449059	0.0449059	0.0216753	0.0216753	0.0216753	0.0216753	0.0449059	0.0449059	0.0216753	0.0216753	0.0216753	0.0362667	0.0216753	0.0216753	0.0216753	0.0362667	0.0216753	0.0216753	0.0449059	0.0449059	0.0216753	0.0216753
2020	460	0.0450891	0.0450891	0.0450891	0.0450891	0.0450891	0.0450891	0.021712	0.021712	0.021712	0.021712	0.0450891	0.0450891	0.021712	0.021712	0.021712	0.0363811	0.021712	0.021712	0.021712	0.0363811	0.021712	0.021712	0.0450891	0.0450891	0.021712	0.021712
2020	480	0.0451946	0.0451946	0.0451946	0.0451946	0.0451946	0.0451946	0.0218081	0.0218081	0.0218081	0.0218081	0.0451946	0.0451946	0.0218081	0.0218081	0.0218081	0.0364584	0.0218081	0.0218081	0.0218081	0.0364584	0.0218081	0.0218081	0.0451946	0.0451946	0.0218081	0.0218081
2020	500	0.0452833	0.0452833	0.0452833	0.0452833	0.0452833	0.0452833	0.0218496	0.0218496	0.0218496	0.0218496	0.0452833	0.0452833	0.0218496	0.0218496	0.0218496	0.0366147	0.0218496	0.0218496	0.0218496	0.0366147	0.0218496	0.0218496	0.0452833	0.0452833	0.0218496	0.0218496
2020	520	0.045449	0.045449	0.045449	0.045449	0.045449	0.045449	0.0219327	0.0219327	0.0219327	0.0219327	0.045449	0.045449	0.0219327	0.0219327	0.0219327	0.0367006	0.0219327	0.0219327	0.0219327	0.0367006	0.0219327	0.0219327	0.045449	0.045449	0.0219327	0.0219327
2020	540	0.0456365	0.0456365	0.0456365	0.0456365	0.0456365	0.0456365	0.0219982	0.0219982	0.0219982	0.0219982	0.0456365	0.0456365	0.0219982	0.0219982	0.0219982	0.0367998	0.0219982	0.0219982	0.0219982	0.0367998	0.0219982	0.0219982	0.0456365	0.0456365	0.0219982	0.0219982
2020	560	0.0458264	0.0458264	0.0458264	0.0458264	0.0458264	0.0458264	0.0221194	0.0221194	0.0221194	0.0221194	0.0458264	0.0458264	0.0221194	0.0221194	0.0221194	0.0369893	0.0221194	0.0221194	0.0221194	0.0369893	0.0221194	0.0221194	0.0458264	0.0458264	0.0221194	0.0221194
2020	580	0.0459143	0.0459143	0.0459143	0.0459143	0.0459143	0.0459143	0.0222292	0.0222292	0.0222292	0.0222292	0.0459143	0.0459143	0.0222292	0.0222292	0.0222292	0.037042	0.0222292	0.0222292	0.0222292	0.037042	0.0222292	0.0222292	0.0459143	0.0459143	0.0222292	0.0222292
2020	600	0.0460683	0.0460683	0.0460683	0.0460683	0.0460683	0.0460683	0.0223159	0.0223159	0.0223159	0.0223159	0.0460683	0.0460683	0.0223159	0.0223159	0.0223159	0.0371526	0.0223159	0.0223159	0.0223159	0.0371526	0.0223159	0.0223159	0.0460683	0.0460683	0.0223159	0.0223159
2020	620	0.0461863	0.0461863	0.0461863	0.0461863	0.0461863	0.0461863	0.0224182	0.0224182	0.0224182	0.0224182	0.0461863	0.0461863	0.0224182	0.0224182	0.0224182	0.0373058	0.0224182	0.0224182	0.0224182	0.0373058	0.0224182	0.0224182	0.0461863	0.0461863	0.0224182	0.0224182
2020	640	0.0462561	0.0462561	0.0462561	0.0462561	0.0462561	0.0462561	0.0224741	0.0224741	0.0224741	0.0224741	0.0462561	0.0462561	0.0224741	0.0224741	0.0224741	0.0374394	0.0224741	0.0224741	0.0224741	0.0374394	0.0224741	0.0224741	0.0462561	0.0462561	0.0224741	0.0224741
2020	660	0.046385	0.046385	0.046385	0.046385	0.046385	0.046385	0.0225899	0.0225899	0.0225899	0.0225899	0.046385	0.046385	0.0225899	0.0225899	0.0225899	0.0375424	0.0225899	0.0225899	0.0225899	0.0375424	0.0225899	0.0225899	0.046385	0.046385	0.0225899	0.0225899
2020	680	0.0465225	0.0465225	0.0465225	0.0465225	0.0465225	0.0465225	0.0226556	0.0226556	0.0226556	0.0226556	0.0465225	0.0465225	0.0226556	0.0226556	0.0226556	0.0376838	0.0226556	0.0226556	0.0226556	0.0376838	0.0226556	0.0226556	0.0465225	0.0465225	0.0226556	0.0226556
2020	700	0.0466337	0.0466337	0.0466337	0.0466337	0.0466337	0.0466337	0.0227314	0.0227314	0.0227314	0.0227314	0.0466337	0.0466337	0.0227314	0.0227314	0.0227314	0.0378242	0.0227314	0.0227314	0.0227314	0.0378242	0.0227314	0.0227314	0.0466337	0.0466337	0.0227314	0.0227314
2020	720	0.0467423	0.0467423	0.0467423	0.0467423	0.0467423	0.0467423	0.0227654	0.0227654	0.0227654	0.0227654	0.0467423	0.0467423	0.0227654	0.0227654	0.0227654	0.0379148	0.0227654	0.0227654	0.0227654	0.0379148	0.0227654	0.0227654	0.0467423	0.0467423	0.0227654	0.0227654
2020	740	0.0469633	0.0469633	0.0469633	0.0469633	0.0469633	0.0469633	0.0228765	0.0228765	0.0228765	0.0228765	0.0469633	0.0469633	0.0228765	0.0228765	0.0228765	0.0380212	0.0228765	0.0228765	0.0228765	0.0380212	0.0228765	0.0228765	0.0469633	0.0469633	0.0228765	0.0228765
2020	760	0.0471164	0.0471164	0.0471164	0.0471164	0.0471164	0.0471164	0.0229696	0.0229696	0.0229696	0.0229696	0.0471164	0.0471164	0.0229696	0.0229696	0.0229696	0.0381768	0.0229696	0.0229696	0.0229696	0.0381768	0.0229696	0.0229696	0.0471164	0.0471164	0.0229696	0.0229696
2020	780	0.0472882	0.0472882	0.0472882	0.0472882	0.0472882	0.0472882	0.0230079	0.0230079	0.0230079	0.0230079	0.0472882	0.0472882	0.0230079	0.0230079	0.0230079	0.0383098	0.0230079	0.0230079	0.0230079	0.0383098	0.0230079	0.0230079	0.0472882	0.0472882	0.0230079	0.0230079
2020	800	0.04744	0.04744	0.04744	0.04744	0.04744	0.04744	0.0231125	0.0231125	0.0231125	0.0231125	0.04744	0.04744	0.0231125	0.0231125	0.0231125	0.0385067	0.0231125	0.0231125	0.0231125	0.0385067	0.0231125	0.0231125	0.04744	0.04744	0.0231125	0.0231125
2020	820	0.0475404	0.0475404	0.0475404	0.0475404	0.0475404	0.0475404	0.0232237	0.0232237	0.0232237	0.0232237	0.0475404	0.0475404	0.0232237	0.0232237	0.0232237	0.0387323	0.0232237	0.0232237	0.0232237	0.0387323	0.0232237	0.0232237	0.0475404	0.0475404	0.0232237	0.0232237
2020	840	0.0477332	0.0477332	0.0477332	0.0477332	0.0477332	0.0477332	0.023267	0.023267	0.023267	0.023267	0.0477332	0.0477332	0.023267	0.023267	0.023267	0.0388494	0.023267	0.023267	0.023267	0.0388494	0.023267	0.023267	0.0477332	0.0477332	0.023267	0.023267
2020	860	0.0477998	0.0477998	0.0477998	0.0477998	0.0477998	0.0477998	0.0233217	0.0233217	0.0233217	0.0233217	0.0477998	0.0477998	0.0233217	0.0233217	0.0233217	0.038969	0.0233217	0.0233217	0.0233217	0.038969	0.0233217	0.0233217	0.0477998	0.0477998	0.0233217	0.0233217
2020	880	0.0478954	0.0478954	0.0478954	0.0478954	0.0478954	0.0478954	0.0234218	0.0234218	0.0234218	0.0234218	0.0478954	0.0478954	0.0234218	0.0234218	0.0234218	0.0391652	0.0234218	0.0234218	0.0234218	0.0391652	0.0234218	0.0234218	0.0478954	0.0478954	0.0234218	0.0234218
2020	900	0.0480399	0.0480399	0.0480399	0.0480399	0.0480399	0.0480399	0.0234572	0.0234572	0.0234572	0.0234572	0.0480399	0.0480399	0.0234572	0.0234572	0.0234572	0.0393603	0.0234572	0.0234572	0.0234572	0.0393603	0.0234572	0.0234572	0.0480399	0.0480399	0.0234572	0.0234572
2020	920	0.0482359	0.0482359	0.0482359	0.0482359	0.0482359	0.0482359	0.0235458	0.0235458	0.0235458	0.0235458	0.0482359	0.0482359	0.0235458	0.0235458	0.0235458	0.0394246	0.0235458	0.0235458	0.0235458	0.0394246	0.0235458	0.0235458	0.0482359	0.0482359	0.0235458	0.0235458
2020	940	0.0485826	0.0485826	0.0485826	0.0485826	0.0485826	0.0485826	0.0236262	0.0236262	0.0236262	0.0236262	0.0485826	0.0485826	0.0236262	0.0236262	0.0236262	0.0395432	0.0236262	0.0236262	0.0236262	0.0395432	0.0236262	0.0236262	0.0485826	0.0485826	0.0236262	0.0236262
2020	960	0.0487296	0.0487296	0.0487296	0.0487296	0.0487296	0.0487296	0.0237679	0.0237679	0.0237679	0.0237679	0.0487296	0.0487296	0.0237679	0.0237679	0.0237679	0.0396534	0.0237679	0.0237679	0.0237679	0.0396534	0.0237679	0.0237679	0.0487296	0.0487296	0.0237679	0.0237679
2020	980	0.0488752	0.0488752	0.0488752	0.0488752	0.0488752	0.0488752	0.02381	0.02381	0.02381	0.02381	0.0488752	0.0488752	0.02381	0.02381	0.02381	0.0398452	0.02381	0.02381	0.02381	0.0398452	0.02381	0.02381	0.0488752	0.0488752	0.02381	0.02381
2020	1000	0.0491269	0.0491269	0.0491269	0.0491269	0.0491269	0.0491269	0.0238705	0.0238705	0.0238705	0.0238705	0.0491269	0.0491269	0.0238705	0.0238705	0.0238705	0.0400093	0.0238705	0.0238705	0.0238705	0.0400093	0.0238705	0.0238705	0.0491269	0.0491269	0.0238705	0.0238705
2020	1020	0.0492889	0.0492889	0.0492889	0.0492889	0.0492889	0.0492889	0.023973	0.023973	0.023973	0.023973	0.0492889	0.0492889	0.023973	0.023973	0.023973	0.0401796	0.023973	0.023973	0.023973	0.0401796	0.023973	0.023973	0.0492889	0.0492889	0.023973	0.023973
2020	1040	0.0495029	0.0495029	0.0495029	0.0495029	0.0495029	0.0495029	0.0240682	0.0240682	0.0240682	0.0240682	0.0495029	0.0495029	0.0240682	0.0240682	0.0240682	0.0402594	0.0240682	0.0240682	0.0240682	0.0402594	0.0240682	0.0240682	0.0495029	0.0495029	0.0240682	0.0240682
2020	1060	0.049696	0.049696	0.049696	0.049696	0.049696	0.049696	0.0242161	0.0242161	0.0242161	0.0242161	0.049696	0.049696	0.0242161	0.0242161	0.0242161	0.0403997	0.0242161	0.0242161	0.0242161	0.0403997	0.0242161	0.0242161	0.049696	0.049696	0.0242161	0.0242161
2020	1080	0.0498606	0.0498606	0.0498606	0.0498606	0.0498606	0.0498606	0.0243022	0.0243022	0.0243022	0.0243022	0.0498606	0.0498606	0.0243022	0.0243022	0.0243022	0.0406232	0.0243022	0.0243022	0.0243022	0.0406232	0.0243022	0.0243022	0.0498606	0.0498606	0.0243022	0.0243022
2020	1100	0.0500437	0.0500437	0.0500437	0.0500437	0.0500437	0.0500437	0.0243577	0.0243577	0.0243577	0.0243577	0.0500437	0.0500437	0.0243577	0.0243577	0.0243577	0.0408227	0.0243577	0.0243577	0.0243577	0.0408227	0.0243577	0.0243577	0.0500437	0.0500437	0.0243577	0.0243577
2020	1120	0.0502405	0.0502405	0.0502405	0.0502405	0.0502405	0.0502405	0.0244499	0.0244499	0.0244499	0.0244499	0.0502405	0.0502405	0.0244499	0.0244499	0.0244499	0.0409237	0.0244499	0.0244499	0.0244499	0.0409237	0.0244499	0.0244499	0.0502405	0.0502405	0.0244499	0.0244499
2020	1140	0.050361	0.050361	0.050361	0.050361	0.050361	0.050361	0.024626	0.024626	0.024626	0.024626	0.050361	0.050361	0.024626	0.024626	0.024626	0.0411045	0.024626	0.024626	0.024626	0.0411045	0.024626	0.024626	0.050361	0.050361	0.024626	0.024626
2020	1160	0.0505605	0.0505605	0.0505605	0.0505605	0.0505605	0.0505605	0.0247123	0.0247123	0.0247123	0.0247123	0.0505605	0.0505605	0.0247123	0.0247123	0.0247123	0.0412522	0.0247123	0.0247123	0.0247123	0.0412522	0.0247123	0.0247123	0.0505605	0.0505605	0.0247123	0.0247123
2020	1180	0.0506618	0.0506618	0.0506618	0.0506618	0.0506618	0.0506618	0.024766	0.024766	0.024766	0.024766	0.0506618	0.0506618	0.024766	0.024766	0.024766	0.041336	0.024766	0.024766	0.024766	0.041336	0.024766	0.024766	0.0506618	0.0506618	0.024766	0.024766
2020	1200	0.0508111	0.0508111	0.0508111	0.0508111	0.0508111	0.0508111	0.0248124	0.0248124	0.0248124	0.0248124	0.0508111	0.0508111	0.0248124	0.0248124	0.0248124	0.0414594	0.0248124	0.0248124	0.0248124	0.0414594	0.0248124	0.0248124	0.0508111	0.0508111	0.0248124	0.0248124
2020	1220	0.0510238	0.0510238	0.0510238	0.0510238	0.0510238	0.0510238	0.0249375	0.0249375	0.0249375	0.0249375	0.0510238	0.0510238	0.0249375	0.0249375	0.0249375	0.0416313	0.0249375	0.0249375	0.0249375	0.0416313	0.0249375	0.0249375	0.0510238	0.0510238	0.0249375	0.0249375
2020	1240	0.0512458	0.0512458	0.0512458	0.0512458	0.0512458	0.0512458	0.0250298	0.0250298	0.0250298	0.0250298	0.0512458	0.0512458	0.0250298	0.0250298	0.0250298	0.041821	0.0250298	0.0250298	0.0250298	0.041821	0.0250298	0.0250298	0.0512458	0.0512458	0.0250298	0.0250298
2020	1260	0.0513657	0.0513657	0.0513657	0.0513657	0.0513657	0.0513657	0.0251246	0.0251246	0.0251246	0.0251246	0.0513657	0.0513657	0.0251246	0.0251246	0.0251246	0.0419026	0.0251246	0.0251246	0.0251246	0.0419026	0.0251246	0.0251246	0.0513657	0.0513657	0.0251246	0.0251246
2020	1280	0.0515194	0.0515194	0.0515194	0.0515194	0.0515194	0.0515194	0.0252226	0.0252226	0.0252226	0.0252226	0.0515194	0.0515194	0.0252226	0.0252226	0.0252226	0.0419499	0.0252226	0.0252226	0.0252226	0.0419499	0.0252226	0.0252226	0.0515194	0.0515194	0.0252226	0.0252226
2020	1300	0.0517955	0.0517955	0.0517955	0.0517955	0.0517955	0.0517955	0.025337	0.025337	0.025337	0.025337	0.0517955	0.0517955	0.025337	0.025337	0.025337	0.042066	0.025337	0.025337	0.025337	0.042066	0.025337	0.025337	0.0517955	0.0517955	0.025337	0.025337
2020	1320	0.0519993	0.0519993	0.0519993	0.0519993	0.0519993	0.0519993	0.0254938	0.0254938	0.0254938	0.0254938	0.0519993	0.0519993	0.0254938	0.0254938	0.0254938	0.042241	0.0254938	0.0254938	0.0254938	0.042241	0.0254938	0.0254938	0.0519993	0.0519993	0.0254938	0.0254938
2020	1340	0.0522521	0.0522521	0.0522521	0.0522521	0.0522521	0.0522521	0.0255901	0.0255901	0.0255901	0.0255901	0.0522521	0.0522521	0.0255901	0.0255901	0.0255901	0.0423794	0.0255901	0.0255901	0.0255901	0.0423794	0.0255901	0.0255901	0.0522521	0.0522521	0.0255901	0.0255901
2020	1360	0.0524043	0.0524043	0.0524043	0.0524043	0.0524043	0.0524043	0.0256463	0.0256463	0.0256463	0.0256463	0.0524043	0.0524043	0.0256463	0.0256463	0.0256463	0.0423817	0.0256463	0.0256463	0.0256463	0.0423817	0.0256463	0.0256463	0.0524043	0.0524043	0.0256463	0.0256463
2020	1380	0.0527434	0.0527434	0.0527434	0.0527434	0.0527434	0.0527434	0.025719	0.025719	0.025719	0.025719	0.0527434	0.0527434	0.025719	0.025719	0.025719	0.0426186	0.025719	0.025719	0.025719	0.0426186	0.025719	0.025719	0.0527434	0.0527434	0.025719	0.025719
2020	1400	0.0529256	0.0529256	0.0529256	0.0529256	0.0529256	0.0529256	0.0258038	0.0258038	0.0258038	0.0258038	0.0529256	0.0529256	0.0258038	0.0258038	0.0258038	0.0426886	0.0258038	0.0258038	0.0258038	0.0426886	0.0258038	0.0258038	0.0529256	0.0529256	0.0258038	0.0258038
2020	1420	0.053102	0.053102	0.053102	0.053102	0.053102	0.053102	0.0258891	0.0258891	0.0258891	0.0258891	0.053102	0.053102	0.0258891	0.0258891	0.0258891	0.0427874	0.0258891	0.0258891	0.0258891	0.0427874	0.0258891	0.0258891	0.053102	0.053102	0.0258891	0.0258891
2020	1440	0.0532672	0.0532672	0.0532672	0.0532672	0.0532672	0.0532672	0.0259663	0.0259663	0.0259663	0.0259663	0.0532672	0.0532672	0.0259663	0.0259663	0.0259663	0.0431057	0.0259663	0.0259663	0.0259663	0.0431057	0.0259663	0.0259663	0.0532672	0.0532672	0.0259663	0.0259663
2020	1460	0.053449	0.053449	0.053449	0.053449	0.053449	0.053449	0.0261345	0.0261345	0.0261345	0.0261345	0.053449	0.053449	0.0261345	0.0261345	0.0261345	0.0432044	0.0261345	0.0261345	0.0261345	0.0432044	0.0261345	0.0261345	0.053449	0.053449	0.0261345	0.0261345
2020	1480	0.0536668	0.0536668	0.0536668	0.0536668	0.0536668	0.0536668	0.0263105	0.0263105	0.0263105	0.0263105	0.0536668	0.0536668	0.0263105	0.0263105	0.0263105	0.0432917	0.0263105	0.0263105	0.0263105	0.0432917	0.0263105	0.0263105	0.0536668	0.0536668	0.0263105	0.0263105
2020	1500	0.0539254	0.0539254	0.0539254	0.0539254	0.0539254	0.0539254	0.0264773	0.0264773	0.0264773	0.0264773	0.0539254	0.0539254	0.0264773	0.0264773	0.0264773	0.043432	0.0264773	0.0264773	0.0264773	0.043432	0.0264773	0.0264773	0.0539254	0.0539254	0.0264773	0.0264773
2020	1520	0.0543007	0.0543007	0.0543007	0.0543007	0.0543007	0.0543007	0.0265815	0.0265815	0.0265815	0.0265815	0.0543007	0.0543007	0.0265815	0.0265815	0.0265815	0.0436469	0.0265815	0.0265815	0.0265815	0.0436469	0.0265815	0.0265815	0.0543007	0.0543007	0.0265815	0.0265815
2020	1540	0.0544133	0.0544133	0.0544133	0.0544133	0.0544133	0.0544133	0.0266939	0.0266939	0.0266939	0.0266939	0.0544133	0.0544133	0.0266939	0.0266939	0.0266939	0.0439765	0.0266939	0.0266939	0.0266939	0.0439765	0.0266939	0.0266939	0.0544133	0.0544133	0.0266939	0.0266939
2020	1560	0.0547091	0.0547091	0.0547091	0.0547091	0.0547091	0.0547091	0.0267596	0.0267596	0.0267596	0.0267596	0.0547091	0.0547091	0.0267596	0.0267596	0.0267596	0.0440635	0.0267596	0.0267596	0.0267596	0.0440635	0.0267596	0.0267596	0.0547091	0.0547091	0.0267596	0.0267596
2020	1580	0.054834	0.054834	0.054834	0.054834	0.054834	0.054834	0.0269261	0.0269261	0.0269261	0.0269261	0.054834	0.054834	0.0269261	0.0269261	0.0269261	0.0441429	0.0269261	0.0269261	0.0269261	0.0441429	0.0269261	0.0269261	0.054834	0.054834	0.0269261	0.0269261
2020	1600	0.0550722	0.0550722	0.0550722	0.0550722	0.0550722	0.0550722	0.0270243	0.0270243	0.0270243	0.0270243	0.0550722	0.0550722	0.0270243	0.0270243	0.0270243	0.0443344	0.0270243	0.0270243	0.0270243	0.0443344	0.0270243	0.0270243	0.0550722	0.0550722	0.0270243	0.0270243
2020	1620	0.055278	0.055278	0.055278	0.055278	0.055278	0.055278	0.0271968	0.0271968	0.0271968	0.0271968	0.055278	0.055278	0.0271968	0.0271968	0.0271968	0.0444249	0.0271968	0.0271968	0.0271968	0.0444249	0.0271968	0.0271968	0.055278	0.055278	0.0271968	0.0271968
2020	1640	0.0554485	0.0554485	0.0554485	0.0554485	0.0554485	0.0554485	0.0273052	0.0273052	0.0273052	0.0273052	0.0554485	0.0554485	0.0273052	0.0273052	0.0273052	0.0446032	0.0273052	0.0273052	0.0273052	0.0446032	0.0273052	0.0273052	0.0554485	0.0554485	0.0273052	0.0273052
2020	1660	0.0557535	0.0557535	0.0557535	0.0557535	0.0557535	0.0557535	0.0274014	0.0274014	0.0274014	0.0274014	0.0557535	0.0557535	0.0274014	0.0274014	0.0274014	0.0447359	0.0274014	0.0274014	0.0274014	0.0447359	0.0274014	0.0274014	0.0557535	0.0557535	0.0274014	0.0274014
2020	1680	0.0559433	0.0559433	0.0559433	0.0559433	0.0559433	0.0559433	0.0274738	0.0274738	0.0274738	0.0274738	0.0559433	0.0559433	0.0274738	0.0274738	0.0274738	0.0448295	0.0274738	0.0274738	0.0274738	0.0448295	0.0274738	0.0274738	0.0559433	0.0559433	0.0274738	0.0274738
2020	1700	0.0560222	0.0560222	0.0560222	0.0560222	0.0560222	0.0560222	0.0275439	0.0275439	0.0275439	0.0275439	0.0560222	0.0560222	0.0275439	0.0275439	0.0275439	0.0449178	0.0275439	0.0275439	0.0275439	0.0449178	0.0275439	0.0275439	0.0560222	0.0560222	0.0275439	0.0275439
2020	1720	0.0563059	0.0563059	0.0563059	0.0563059	0.0563059	0.0563059	0.0275663	0.0275663	0.0275663	0.0275663	0.0563059	0.0563059	0.0275663	0.0275663	0.0275663	0.0449488	0.0275663	0.0275663	0.0275663	0.0449488	0.0275663	0.0275663	0.0563059	0.0563059	0.0275663	0.0275663
2020	1740	0.0564246	0.0564246	0.0564246	0.0564246	0.0564246	0.0564246	0.0276686	0.0276686	0.0276686	0.0276686	0.0564246	0.0564246	0.0276686	0.0276686	0.0276686	0.045039	0.0276686	0.0276686	0.0276686	0.045039	0.0276686	0.0276686	0.0564246	0.0564246	0.0276686	0.0276686
2020	1760	0.056552	0.056552	0.056552	0.056552	0.056552	0.056552	0.0276965	0.0276965	0.0276965	0.0276965	0.056552	0.056552	0.0276965	0.0276965	0.0276965	0.0450637	0.0276965	0.0276965	0.0276965	0.0450637	0.0276965	0.0276965	0.056552	0.056552	0.0276965	0.0276965
2020	1780	0.0567346	0.0567346	0.0567346	0.0567346	0.0567346	0.0567346	0.0277255	0.0277255	0.0277255	0.0277255	0.0567346	0.0567346	0.0277255	0.0277255	0.0277255	0.045138	0.0277255	0.0277255	0.0277255	0.045138	0.0277255	0.0277255	0.0567346	0.0567346	0.0277255	0.0277255
2020	1800	0.0568565	0.0568565	0.0568565	0.0568565	0.0568565	0.0568565	0.0277491	0.0277491	0.0277491	0.0277491	0.0568565	0.0568565	0.0277491	0.0277491	0.0277491	0.045178	0.0277491	0.0277491	0.0277491	0.045178	0.0277491	0.0277491	0.0568565	0.0568565	0.0277491	0.0277491
2020	1820	0.0569066	0.0569066	0.0569066	0.0569066	0.0569066	0.0569066	0.0277978	0.0277978	0.0277978	0.0277978	0.0569066	0.0569066	0.0277978	0.0277978	0.0277978	0.0452227	0.0277978	0.0277978	0.0277978	0.0452227	0.0277978	0.0277978	0.0569066	0.0569066	0.0277978	0.0277978
2020	1840	0.0569614	0.0569614	0.0569614	0.0569614	0.0569614	0.0569614	0.0278309	0.0278309	0.0278309	0.0278309	0.0569614	0.0569614	0.0278309	0.0278309	0.0278309	0.0452345	0.0278309	0.0278309	0.0278309	0.0452345	0.0278309	0.0278309	0.0569614	0.0569614	0.0278309	0.0278309
2020	1860	0.0569947	0.0569947	0.0569947	0.0569947	0.0569947	0.0569947	0.0278544	0.0278544	0.0278544	0.0278544	0.0569947	0.0569947	0.0278544	0.0278544	0.0278544	0.0452573	0.0278544	0.0278544	0.0278544	0.0452573	0.0278544	0.0278544	0.0569947	0.0569947	0.0278544	0.0278544
2020	1880	0.057053	0.057053	0.057053	0.057053	0.057053	0.057053	0.0278872	0.0278872	0.0278872	0.0278872	0.057053	0.057053	0.0278872	0.0278872	0.0278872	0.0453272	0.0278872	0.0278872	0.0278872	0.0453272	0.0278872	0.0278872	0.057053	0.057053	0.0278872	0.0278872
2020	1900	0.0571281	0.0571281	0.0571281	0.0571281	0.0571281	0.0571281	0.0278911	0.0278911	0.0278911	0.0278911	0.0571281	0.0571281	0.0278911	0.0278911	0.0278911	0.0453395	0.0278911	0.0278911	0.0278911	0.0453395	0.0278911	0.0278911	0.0571281	0.0571281	0.0278911	0.0278911
2020	1920	0.0571686	0.0571686	0.0571686	0.0571686	0.0571686	0.0571686	0.0278957	0.0278957	0.0278957	0.0278957	0.0571686	0.0571686	0.0278957	0.0278957	0.0278957	0.0454077	0.0278957	0.0278957	0.0278957	0.0454077	0.0278957	0.0278957	0.0571686	0.0571686	0.0278957	0.0278957
2020	1940	0.0572097	0.0572097	0.0572097	0.0572097	0.0572097	0.0572097	0.0279149	0.0279149	0.0279149	0.0279149	0.0572097	0.0572097	0.0279149	0.0279149	0.0279149	0.0454371	0.0279149	0.0279149	0.0279149	0.0454371	0.0279149	0.0279149	0.0572097	0.0572097	0.0279149	0.0279149
2020	1960	0.0572413	0.0572413	0.0572413	0.0572413	0.0572413	0.0572413	0.027938	0.027938	0.027938	0.027938	0.0572413	0.0572413	0.027938	0.027938	0.027938	0.0454777	0.027938	0.027938	0.027938	0.0454777	0.027938	0.027938	0.0572413	0.0572413	0.027938	0.027938
2020	1980	0.0573314	0.0573314	0.0573314	0.0573314	0.0573314	0.0573314	0.0279476	0.0279476	0.0279476	0.0279476	0.0573314	0.0573314	0.0279476	0.0279476	0.0279476	0.0454996	0.0279476	0.0279476	0.0279476	0.0454996	0.0279476	0.0279476	0.0573314	0.0573314	0.0279476	0.0279476
2020	2000	0.0574722	0.0574722	0.0574722	0.0574722	0.0574722	0.0574722	0.027973	0.027973	0.027973	0.027973	0.0574722	0.0574722	0.027973	0.027973	0.027973	0.045568	0.027973	0.027973	0.027973	0.045568	0.027973	0.027973	0.0574722	0.0574722	0.027973	0.027973
2020	2020	0.0575249	0.0575249	0.0575249	0.0575249	0.0575249	0.0575249	0.0279925	0.0279925	0.0279925	0.0279925	0.0575249	0.0575249	0.0279925	0.0279925	0.0279925	0.04562	0.0279925	0.0279925	0.0279925	0.04562	0.0279925	0.0279925	0.0575249	0.0575249	0.0279925	0.0279925
2020	2040	0.0575312	0.0575312	0.0575312	0.0575312	0.0575312	0.0575312	0.0280087	0.0280087	0.0280087	0.0280087	0.0575312	0.0575312	0.0280087	0.0280087	0.0280087	0.0456495	0.0280087	0.0280087	0.0280087	0.0456495	0.0280087	0.0280087	0.0575312	0.0575312	0.0280087	0.0280087
2020	2060	0.0576074	0.0576074	0.0576074	0.0576074	0.0576074	0.0576074	0.0280368	0.0280368	0.0280368	0.0280368	0.0576074	0.0576074	0.0280368	0.0280368	0.0280368	0.045659	0.0280368	0.0280368	0.0280368	0.045659	0.0280368	0.0280368	0.0576074	0.0576074	0.0280368	0.0280368
2020	2080	0.0576117	0.0576117	0.0576117	0.0576117	0.0576117	0.0576117	0.028069	0.028069	0.028069	0.028069	0.0576117	0.0576117	0.028069	0.028069	0.028069	0.0457261	0.028069	0.028069	0.028069	0.0457261	0.028069	0.028069	0.0576117	0.0576117	0.028069	0.028069
2020	2100	0.0576669	0.0576669	0.0576669	0.0576669	0.0576669	0.0576669	0.0280794	0.0280794	0.0280794	0.0280794	0.0576669	0.0576669	0.0280794	0.0280794	0.0280794	0.0457463	0.0280794	0.0280794	0.0280794	0.0457463	0.0280794	0.0280794	0.0576669	0.0576669	0.0280794	0.0280794
2020	2120	0.0577067	0.0577067	0.0577067	0.0577067	0.0577067	0.0577067	0.0281129	0.0281129	0.0281129	0.0281129	0.0577067	0.0577067	0.0281129	0.0281129	0.0281129	0.0458252	0.0281129	0.0281129	0.0281129	0.0458252	0.0281129	0.0281129	0.0577067	0.0577067	0.0281129	0.0281129
2020	2140	0.0577717	0.0577717	0.0577717	0.0577717	0.0577717	0.0577717	0.0281195	0.0281195	0.0281195	0.0281195	0.0577717	0.0577717	0.0281195	0.0281195	0.0281195	0.0458863	0.0281195	0.0281195	0.0281195	0.0458863	0.0281195	0.0281195	0.0577717	0.0577717	0.0281195	0.0281195
2020	2160	0.0578792	0.0578792	0.0578792	0.0578792	0.0578792	0.0578792	0.0281488	0.0281488	0.0281488	0.0281488	0.0578792	0.0578792	0.0281488	0.0281488	0.0281488	0.0459055	0.0281488	0.0281488	0.0281488	0.0459055	0.0281488	0.0281488	0.0578792	0.0578792	0.0281488	0.0281488
2020	2180	0.0579582	0.0579582	0.0579582	0.0579582	0.0579582	0.0579582	0.0281511	0.0281511	0.0281511	0.0281511	0.0579582	0.0579582	0.0281511	0.0281511	0.0281511	0.0459287	0.0281511	0.0281511	0.0281511	0.0459287	0.0281511	0.0281511	0.0579582	0.0579582	0.0281511	0.0281511
2020	2200	0.058016	0.058016	0.058016	0.058016	0.058016	0.058016	0.0281548	0.0281548	0.0281548	0.0281548	0.058016	0.058016	0.0281548	0.0281548	0.0281548	0.0459649	0.0281548	0.0281548	0.0281548	0.0459649	0.0281548	0.0281548	0.058016	0.058016	0.0281548	0.0281548
2020	2220	0.0580828	0.0580828	0.0580828	0.0580828	0.0580828	0.0580828	0.028181	0.028181	0.028181	0.028181	0.0580828	0.0580828	0.028181	0.028181	0.028181	0.0459742	0.028181	0.028181	0.028181	0.0459742	0.028181	0.028181	0.0580828	0.0580828	0.028181	0.028181
2020	2240	0.0581817	0.0581817	0.0581817	0.0581817	0.0581817	0.0581817	0.028225	0.028225	0.028225	0.028225	0.0581817	0.0581817	0.028225	0.028225	0.028225	0.046	0.028225	0.028225	0.028225	0.046	0.028225	0.028225	0.0581817	0.0581817	0.028225	0.028225
2020	2260	0.0582574	0.0582574	0.0582574	0.0582574	0.0582574	0.0582574	0.0282335	0.0282335	0.0282335	0.0282335	0.0582574	0.0582574	0.0282335	0.0282335	0.0282335	0.0460032	0.0282335	0.0282335	0.0282335	0.0460032	0.0282335	0.0282335	0.0582574	0.0582574	0.0282335	0.0282335
2020	2280	0.0582979	0.0582979	0.0582979	0.0582979	0.0582979	0.0582979	0.0282536	0.0282536	0.0282536	0.0282536	0.0582979	0.0582979	0.0282536	0.0282536	0.0282536	0.0460381	0.0282536	0.0282536	0.0282536	0.0460381	0.0282536	0.0282536	0.0582979	0.0582979	0.0282536	0.0282536
2020	2300	0.0583902	0.0583902	0.0583902	0.0583902	0.0583902	0.0583902	0.0282834	0.0282834	0.0282834	0.0282834	0.0583902	0.0583902	0.0282834	0.0282834	0.0282834	0.0460522	0.0282834	0.0282834	0.0282834	0.0460522	0.0282834	0.0282834	0.0583902	0.0583902	0.0282834	0.0282834
2020	2320	0.0584446	0.0584446	0.0584446	0.0584446	0.0584446	0.0584446	0.0283101	0.0283101	0.0283101	0.0283101	0.0584446	0.0584446	0.0283101	0.0283101	0.0283101	0.0461355	0.0283101	0.0283101	0.0283101	0.0461355	0.0283101	0.0283101	0.0584446	0.0584446	0.0283101	0.0283101
2020	2340	0.0584649	0.0584649	0.0584649	0.0584649	0.0584649	0.0584649	0.0283685	0.0283685	0.0283685	0.0283685	0.0584649	0.0584649	0.0283685	0.0283685	0.0283685	0.0461696	0.0283685	0.0283685	0.0283685	0.0461696	0.0283685	0.0283685	0.0584649	0.0584649	0.0283685	0.0283685
2020	2360	0.0584737	0.0584737	0.0584737	0.0584737	0.0584737	0.0584737	0.0283705	0.0283705	0.0283705	0.0283705	0.0584737	0.0584737	0.0283705	0.0283705	0.0283705	0.0461869	0.0283705	0.0283705	0.0283705	0.0461869	0.0283705	0.0283705	0.0584737	0.0584737	0.0283705	0.0283705
2020	2380	0.0585127	0.0585127	0.0585127	0.0585127	0.0585127	0.0585127	0.0283806	0.0283806	0.0283806	0.0283806	0.0585127	0.0585127	0.0283806	0.0283806	0.0283806	0.0462048	0.0283806	0.0283806	0.0283806	0.0462048	0.0283806	0.0283806	0.0585127	0.0585127	0.0283806	0.0283806
2020	2400	0.0585516	0.0585516	0.0585516	0.0585516	0.0585516	0.0585516	0.0283927	0.0283927	0.0283927	0.0283927	0.0585516	0.0585516	0.0283927	0.0283927	0.0283927	0.0462293	0.0283927	0.0283927	0.0283927	0.0462293	0.0283927	0.0283927	0.0585516	0.0585516	0.0283927	0.0283927
2020	2420	0.058596	0.058596	0.058596	0.058596	0.058596	0.058596	0.0284031	0.0284031	0.0284031	0.0284031	0.058596	0.058596	0.0284031	0.0284031	0.0284031	0.0463096	0.0284031	0.0284031	0.0284031	0.0463096	0.0284031	0.0284031	0.058596	0.058596	0.0284031	0.0284031
2020	2440	0.0586436	0.0586436	0.0586436	0.0586436	0.0586436	0.0586436	0.0284098	0.0284098	0.0284098	0.0284098	0.0586436	0.0586436	0.0284098	0.0284098	0.0284098	0.046371	0.0284098	0.0284098	0.0284098	0.046371	0.0284098	0.0284098	0.0586436	0.0586436	0.0284098	0.0284098
2020	2460	0.0587058	0.0587058	0.0587058	0.0587058	0.0587058	0.0587058	0.0284418	0.0284418	0.0284418	0.0284418	0.0587058	0.0587058	0.0284418	0.0284418	0.0284418	0.0463725	0.0284418	0.0284418	0.0284418	0.0463725	0.0284418	0.0284418	0.0587058	0.0587058	0.0284418	0.0284418
2020	2480	0.058745	0.058745	0.058745	0.058745	0.058745	0.058745	0.0284613	0.0284613	0.0284613	0.0284613	0.058745	0.058745	0.0284613	0.0284613	0.0284613	0.0464033	0.0284613	0.0284613	0.0284613	0.0464033	0.0284613	0.0284613	0.058745	0.058745	0.0284613	0.0284613
2020	2500	0.0587857	0.0587857	0.0587857	0.0587857	0.0587857	0.0587857	0.0285146	0.0285146	0.0285146	0.0285146	0.0587857	0.0587857	0.0285146	0.0285146	0.0285146	0.0464783	0.0285146	0.0285146	0.0285146	0.0464783	0.0285146	0.0285146	0.0587857	0.0587857	0.0285146	0.0285146
2020	2520	0.0587904	0.0587904	0.0587904	0.0587904	0.0587904	0.0587904	0.0285277	0.0285277	0.0285277	0.0285277	0.0587904	0.0587904	0.0285277	0.0285277	0.0285277	0.046518	0.0285277	0.0285277	0.0285277	0.046518	0.0285277	0.0285277	0.0587904	0.0587904	0.0285277	0.0285277
2020	2540	0.0588276	0.0588276	0.0588276	0.0588276	0.0588276	0.0588276	0.0285465	0.0285465	0.0285465	0.0285465	0.0588276	0.0588276	0.0285465	0.0285465	0.0285465	0.0465586	0.0285465	0.0285465	0.0285465	0.0465586	0.0285465	0.0285465	0.0588276	0.0588276	0.0285465	0.0285465
2020	2560	0.0588872	0.0588872	0.0588872	0.0588872	0.0588872	0.0588872	0.028552	0.028552	0.028552	0.028552	0.0588872	0.0588872	0.028552	0.028552	0.028552	0.0465753	0.028552	0.028552	0.028552	0.0465753	0.028552	0.028552	0.0588872	0.0588872	0.028552	0.028552
2020	2580	0.0589697	0.0589697	0.0589697	0.0589697	0.0589697	0.0589697	0.0285701	0.0285701	0.0285701	0.0285701	0.0589697	0.0589697	0.0285701	0.0285701	0.0285701	0.0466732	0.0285701	0.0285701	0.0285701	0.0466732	0.0285701	0.0285701	0.0589697	0.0589697	0.0285701	0.0285701
2020	2600	0.0590595	0.0590595	0.0590595	0.0590595	0.0590595	0.0590595	0.0285958	0.0285958	0.0285958	0.0285958	0.0590595	0.0590595	0.0285958	0.0285958	0.0285958	0.0466732	0.0285958	0.0285958	0.0285958	0.0466732	0.0285958	0.0285958	0.0590595	0.0590595	0.0285958	0.0285958
2020	2620	0.0591062	0.0591062	0.0591062	0.0591062	0.0591062	0.0591062	0.0286278	0.0286278	0.0286278	0.0286278	0.0591062	0.0591062	0.0286278	0.0286278	0.0286278	0.0467349	0.0286278	0.0286278	0.0286278	0.0467349	0.0286278	0.0286278	0.0591062	0.0591062	0.0286278	0.0286278
2020	2640	0.0591126	0.0591126	0.0591126	0.0591126	0.0591126	0.0591126	0.028639	0.028639	0.028639	0.028639	0.0591126	0.0591126	0.028639	0.028639	0.028639	0.0467735	0.028639	0.028639	0.028639	0.0467735	0.028639	0.028639	0.0591126	0.0591126	0.028639	0.028639
2020	2660	0.0591339	0.0591339	0.0591339	0.0591339	0.0591339	0.0591339	0.0287005	0.0287005	0.0287005	0.0287005	0.0591339	0.0591339	0.0287005	0.0287005	0.0287005	0.0468249	0.0287005	0.0287005	0.0287005	0.0468249	0.0287005	0.0287005	0.0591339	0.0591339	0.0287005	0.0287005
2020	2680	0.0591409	0.0591409	0.0591409	0.0591409	0.0591409	0.0591409	0.0287467	0.0287467	0.0287467	0.0287467	0.0591409	0.0591409	0.0287467	0.0287467	0.0287467	0.0468954	0.0287467	0.0287467	0.0287467	0.0468954	0.0287467	0.0287467	0.0591409	0.0591409	0.0287467	0.0287467
2020	2700	0.0591821	0.0591821	0.0591821	0.0591821	0.0591821	0.0591821	0.02878	0.02878	0.02878	0.02878	0.0591821	0.0591821	0.02878	0.02878	0.02878	0.0469361	0.02878	0.02878	0.02878	0.0469361	0.02878	0.02878	0.0591821	0.0591821	0.02878	0.02878
2020	2720	0.0592762	0.0592762	0.0592762	0.0592762	0.0592762	0.0592762	0.0287911	0.0287911	0.0287911	0.0287911	0.0592762	0.0592762	0.0287911	0.0287911	0.0287911	0.0469399	0.0287911	0.0287911	0.0287911	0.0469399	0.0287911	0.0287911	0.0592762	0.0592762	0.0287911	0.0287911
2020	2740	0.0592805	0.0592805	0.0592805	0.0592805	0.0592805	0.0592805	0.0287935	0.0287935	0.0287935	0.0287935	0.0592805	0.0592805	0.0287935	0.0287935	0.0287935	0.0469855	0.0287935	0.0287935	0.0287935	0.0469855	0.0287935	0.0287935	0.0592805	0.0592805	0.0287935	0.0287935
2020	2760	0.0593252	0.0593252	0.0593252	0.0593252	0.0593252	0.0593252	0.0288041	0.0288041	0.0288041	0.0288041	0.0593252	0.0593252	0.0288041	0.0288041	0.0288041	0.0470087	0.0288041	0.0288041	0.0288041	0.0470087	0.0288041	0.0288041	0.0593252	0.0593252	0.0288041	0.0288041
2020	2780	0.0594061	0.0594061	0.0594061	0.0594061	0.0594061	0.0594061	0.0288132	0.0288132	0.0288132	0.0288132	0.0594061	0.0594061	0.0288132	0.0288132	0.0288132	0.0470755	0.0288132	0.0288132	0.0288132	0.0470755	0.0288132	0.0288132	0.0594061	0.0594061	0.0288132	0.0288132
2020	2800	0.0594451	0.0594451	0.0594451	0.0594451	0.0594451	0.0594451	0.0288582	0.0288582	0.0288582	0.0288582	0.0594451	0.0594451	0.0288582	0.0288582	0.0288582	0.0471093	0.0288582	0.0288582	0.0288582	0.0471093	0.0288582	0.0288582	0.0594451	0.0594451	0.0288582	0.0288582
2020	2820	0.0595412	0.0595412	0.0595412	0.0595412	0.0595412	0.0595412	0.028884	0.028884	0.028884	0.028884	0.0595412	0.0595412	0.028884	0.028884	0.028884	0.0471688	0.028884	0.028884	0.028884	0.0471688	0.028884	0.028884	0.0595412	0.0595412	0.028884	0.028884
2020	2840	0.0595646	0.0595646	0.0595646	0.0595646	0.0595646	0.0595646	0.0289059	0.0289059	0.0289059	0.0289059	0.0595646	0.0595646	0.0289059	0.0289059	0.0289059	0.0472394	0.0289059	0.0289059	0.0289059	0.0472394	0.0289059	0.0289059	0.0595646	0.0595646	0.0289059	0.0289059
2020	2860	0.0596523	0.0596523	0.0596523	0.0596523	0.0596523	0.0596523	0.0289342	0.0289342	0.0289342	0.0289342	0.0596523	0.0596523	0.0289342	0.0289342	0.0289342	0.047329	0.0289342	0.0289342	0.0289342	0.047329	0.0289342	0.0289342	0.0596523	0.0596523	0.0289342	0.0289342
2020	2880	0.0597297	0.0597297	0.0597297	0.0597297	0.0597297	0.0597297	0.0289567	0.0289567	0.0289567	0.0289567	0.0597297	0.0597297	0.0289567	0.0289567	0.0289567	0.0474032	0.0289567	0.0289567	0.0289567	0.0474032	0.0289567	0.0289567	0.0597297	0.0597297	0.0289567	0.0289567
2020	2900	0.0597859	0.0597859	0.0597859	0.0597859	0.0597859	0.0597859	0.0289914	0.0289914	0.0289914	0.0289914	0.0597859	0.0597859	0.0289914	0.0289914	0.0289914	0.0474316	0.0289914	0.0289914	0.0289914	0.0474316	0.0289914	0.0289914	0.0597859	0.0597859	0.0289914	0.0289914
2020	2920	0.0598913	0.0598913	0.0598913	0.0598913	0.0598913	0.0598913	0.0290079	0.0290079	0.0290079	0.0290079	0.0598913	0.0598913	0.0290079	0.0290079	0.0290079	0.0474577	0.0290079	0.0290079	0.0290079	0.0474577	0.0290079	0.0290079	0.0598913	0.0598913	0.0290079	0.0290079
2020	2940	0.0599156	0.0599156	0.0599156	0.0599156	0.0599156	0.0599156	0.0290391	0.0290391	0.0290391	0.0290391	0.0599156	0.0599156	0.0290391	0.0290391	0.0290391	0.0474788	0.0290391	0.0290391	0.0290391	0.0474788	0.0290391	0.0290391	0.0599156	0.0599156	0.0290391	0.0290391
2020	2960	0.0599453	0.0599453	0.0599453	0.0599453	0.0599453	0.0599453	0.0290473	0.0290473	0.0290473	0.0290473	0.0599453	0.0599453	0.0290473	0.0290473	0.0290473	0.0475302	0.0290473	0.0290473	0.0290473	0.0475302	0.0290473	0.0290473	0.0599453	0.0599453	0.0290473	0.0290473
2020	2980	0.0599621	0.0599621	0.0599621	0.0599621	0.0599621	0.0599621	0.0290872	0.0290872	0.0290872	0.0290872	0.0599621	0.0599621	0.0290872	0.0290872	0.0290872	0.0475722	0.0290872	0.0290872	0.0290872	0.0475722	0.0290872	0.0290872	0.0599621	0.0599621	0.0290872	0.0290872
2020	3000	0.0599966	0.0599966	0.0599966	0.0599966	0.0599966	0.0599966	0.0290909	0.0290909	0.0290909	0.0290909	0.0599966	0.0599966	0.0290909	0.0290909	0.0290909	0.0476188	0.0290909	0.0290909	0.0290909	0.0476188	0.0290909	0.0290909	0.0599966	0.0599966	0.0290909	0.0290909
2020	3020	0.0600395	0.0600395	0.0600395	0.0600395	0.0600395	0.0600395	0.0291352	0.0291352	0.0291352	0.0291352	0.0600395	0.0600395	0.0291352	0.0291352	0.0291352	0.0476811	0.0291352	0.0291352	0.0291352	0.0476811	0.0291352	0.0291352	0.0600395	0.0600395	0.0291352	0.0291352
2020	3040	0.0600553	0.0600553	0.0600553	0.0600553	0.0600553	0.0600553	0.0291735	0.0291735	0.0291735	0.0291735	0.0600553	0.0600553	0.0291735	0.0291735	0.0291735	0.0477352	0.0291735	0.0291735	0.0291735	0.0477352	0.0291735	0.0291735	0.0600553	0.0600553	0.0291735	0.0291735
2020	3060	0.0600793	0.0600793	0.0600793	0.0600793	0.0600793	0.0600793	0.0291918	0.0291918	0.0291918	0.0291918	0.0600793	0.0600793	0.0291918	0.0291918	0.0291918	0.0477424	0.0291918	0.0291918	0.0291918	0.0477424	0.0291918	0.0291918	0.0600793	0.0600793	0.0291918	0.0291918
2020	3080	0.060148	0.060148	0.060148	0.060148	0.060148	0.060148	0.0292362	0.0292362	0.0292362	0.0292362	0.060148	0.060148	0.0292362	0.0292362	0.0292362	0.0477491	0.0292362	0.0292362	0.0292362	0.0477491	0.0292362	0.0292362	0.060148	0.060148	0.0292362	0.0292362
2020	3100	0.0602148	0.0602148	0.0602148	0.0602148	0.0602148	0.0602148	0.0292818	0.0292818	0.0292818	0.0292818	0.0602148	0.0602148	0.0292818	0.0292818	0.0292818	0.0477651	0.0292818	0.0292818	0.0292818	0.0477651	0.0292818	0.0292818	0.0602148	0.0602148	0.0292818	0.0292818
2020	3120	0.0602753	0.0602753	0.0602753	0.0602753	0.0602753	0.0602753	0.0293057	0.0293057	0.0293057	0.0293057	0.0602753	0.0602753	0.0293057	0.0293057	0.0293057	0.0477855	0.0293057	0.0293057	0.0293057	0.0477855	0.0293057	0.0293057	0.0602753	0.0602753	0.0293057	0.0293057
2020	3140	0.0602893	0.0602893	0.0602893	0.0602893	0.0602893	0.0602893	0.0293213	0.0293213	0.0293213	0.0293213	0.0602893	0.0602893	0.0293213	0.0293213	0.0293213	0.0478892	0.0293213	0.0293213	0.0293213	0.0478892	0.0293213	0.0293213	0.0602893	0.0602893	0.0293213	0.0293213
2020	3160	0.0604002	0.0604002	0.0604002	0.0604002	0.0604002	0.0604002	0.0294122	0.0294122	0.0294122	0.0294122	0.0604002	0.0604002	0.0294122	0.0294122	0.0294122	0.0478892	0.0294122	0.0294122	0.0294122	0.0478892	0.0294122	0.0294122	0.0604002	0.0604002	0.0294122	0.0294122
2020	3180	0.0604205	0.0604205	0.0604205	0.0604205	0.0604205	0.0604205	0.0294191	0.0294191	0.0294191	0.0294191	0.0604205	0.0604205	0.0294191	0.0294191	0.0294191	0.0479375	0.0294191	0.0294191	0.0294191	0.0479375	0.0294191	0.0294191	0.0604205	0.0604205	0.0294191	0.0294191
2020	3200	0.0604405	0.0604405	0.0604405	0.0604405	0.0604405	0.0604405	0.0294335	0.0294335	0.0294335	0.0294335	0.0604405	0.0604405	0.0294335	0.0294335	0.0294335	0.0480028	0.0294335	0.0294335	0.0294335	0.0480028	0.0294335	0.0294335	0.0604405	0.0604405	0.0294335	0.0294335
2020	3220	0.0604642	0.0604642	0.0604642	0.0604642	0.0604642	0.0604642	0.0294925	0.0294925	0.0294925	0.0294925	0.0604642	0.0604642	0.0294925	0.0294925	0.0294925	0.0480295	0.0294925	0.0294925	0.0294925	0.0480295	0.0294925	0.0294925	0.0604642	0.0604642	0.0294925	0.0294925
2020	3240	0.0604887	0.0604887	0.0604887	0.0604887	0.0604887	0.0604887	0.0295084	0.0295084	0.0295084	0.0295084	0.0604887	0.0604887	0.0295084	0.0295084	0.0295084	0.0480944	0.0295084	0.0295084	0.0295084	0.0480944	0.0295084	0.0295084	0.0604887	0.0604887	0.0295084	0.0295084
2020	3260	0.0605527	0.0605527	0.0605527	0.0605527	0.0605527	0.0605527	0.0295305	0.0295305	0.0295305	0.0295305	0.0605527	0.0605527	0.0295305	0.0295305	0.0295305	0.0482339	0.0295305	0.0295305	0.0295305	0.0482339	0.0295305	0.0295305	0.0605527	0.0605527	0.0295305	0.0295305
2020	3280	0.0606186	0.0606186	0.0606186	0.0606186	0.0606186	0.0606186	0.0295514	0.0295514	0.0295514	0.0295514	0.0606186	0.0606186	0.0295514	0.0295514	0.0295514	0.0482451	0.0295514	0.0295514	0.0295514	0.0482451	0.0295514	0.0295514	0.0606186	0.0606186	0.0295514	0.0295514
2020	3300	0.060669	0.060669	0.060669	0.060669	0.060669	0.060669	0.0295756	0.0295756	0.0295756	0.0295756	0.060669	0.060669	0.0295756	0.0295756	0.0295756	0.0482526	0.0295756	0.0295756	0.0295756	0.0482526	0.0295756	0.0295756	0.060669	0.060669	0.0295756	0.0295756
2020	3320	0.060685	0.060685	0.060685	0.060685	0.060685	0.060685	0.0295817	0.0295817	0.0295817	0.0295817	0.060685	0.060685	0.0295817	0.0295817	0.0295817	0.0482845	0.0295817	0.0295817	0.0295817	0.0482845	0.0295817	0.0295817	0.060685	0.060685	0.0295817	0.0295817
2020	3340	0.0607492	0.0607492	0.0607492	0.0607492	0.0607492	0.0607492	0.0296244	0.0296244	0.0296244	0.0296244	0.0607492	0.0607492	0.0296244	0.0296244	0.0296244	0.0483353	0.0296244	0.0296244	0.0296244	0.0483353	0.0296244	0.0296244	0.0607492	0.0607492	0.0296244	0.0296244
2020	3360	0.0607803	0.0607803	0.0607803	0.0607803	0.0607803	0.0607803	0.0296278	0.0296278	0.0296278	0.0296278	0.0607803	0.0607803	0.0296278	0.0296278	0.0296278	0.0483692	0.0296278	0.0296278	0.0296278	0.0483692	0.0296278	0.0296278	0.0607803	0.0607803	0.0296278	0.0296278
2020	3380	0.0608963	0.0608963	0.0608963	0.0608963	0.0608963	0.0608963	0.029645	0.029645	0.029645	0.029645	0.0608963	0.0608963	0.029645	0.029645	0.029645	0.0483755	0.029645	0.029645	0.029645	0.0483755	0.029645	0.029645	0.0608963	0.0608963	0.029645	0.029645
2020	3400	0.0610105	0.0610105	0.0610105	0.0610105	0.0610105	0.0610105	0.0296618	0.0296618	0.0296618	0.0296618	0.0610105	0.0610105	0.0296618	0.0296618	0.0296618	0.0483978	0.0296618	0.0296618	0.0296618	0.0483978	0.0296618	0.0296618	0.0610105	0.0610105	0.0296618	0.0296618
2020	3420	0.0611461	0.0611461	0.0611461	0.0611461	0.0611461	0.0611461	0.0296949	0.0296949	0.0296949	0.0296949	0.0611461	0.0611461	0.0296949	0.0296949	0.0296949	0.0484622	0.0296949	0.0296949	0.0296949	0.0484622	0.0296949	0.0296949	0.0611461	0.0611461	0.0296949	0.0296949
2020	3440	0.0611861	0.0611861	0.0611861	0.0611861	0.0611861	0.0611861	0.0297446	0.0297446	0.0297446	0.0297446	0.0611861	0.0611861	0.0297446	0.0297446	0.0297446	0.0485114	0.0297446	0.0297446	0.0297446	0.0485114	0.0297446	0.0297446	0.0611861	0.0611861	0.0297446	0.0297446
2020	3460	0.061216	0.061216	0.061216	0.061216	0.061216	0.061216	0.0297512	0.0297512	0.0297512	0.0297512	0.061216	0.061216	0.0297512	0.0297512	0.0297512	0.0485561	0.0297512	0.0297512	0.0297512	0.0485561	0.0297512	0.0297512	0.061216	0.061216	0.0297512	0.0297512
2020	3480	0.0612736	0.0612736	0.0612736	0.0612736	0.0612736	0.0612736	0.0297643	0.0297643	0.0297643	0.0297643	0.0612736	0.0612736	0.0297643	0.0297643	0.0297643	0.0486036	0.0297643	0.0297643	0.0297643	0.0486036	0.0297643	0.0297643	0.0612736	0.0612736	0.0297643	0.0297643
2020	3500	0.0613664	0.0613664	0.0613664	0.0613664	0.0613664	0.0613664	0.0298046	0.0298046	0.0298046	0.0298046	0.0613664	0.0613664	0.0298046	0.0298046	0.0298046	0.048631	0.0298046	0.0298046	0.0298046	0.048631	0.0298046	0.0298046	0.0613664	0.0613664	0.0298046	0.0298046
2020	3520	0.0614098	0.0614098	0.0614098	0.0614098	0.0614098	0.0614098	0.0298889	0.0298889	0.0298889	0.0298889	0.0614098	0.0614098	0.0298889	0.0298889	0.0298889	0.0486443	0.0298889	0.0298889	0.0298889	0.0486443	0.0298889	0.0298889	0.0614098	0.0614098	0.0298889	0.0298889
2020	3540	0.0614445	0.0614445	0.0614445	0.0614445	0.0614445	0.0614445	0.0299191	0.0299191	0.0299191	0.0299191	0.0614445	0.0614445	0.0299191	0.0299191	0.0299191	0.048736	0.0299191	0.0299191	0.0299191	0.048736	0.0299191	0.0299191	0.0614445	0.0614445	0.0299191	0.0299191
2020	3560	0.0615188	0.0615188	0.0615188	0.0615188	0.0615188	0.0615188	0.0299337	0.0299337	0.0299337	0.0299337	0.0615188	0.0615188	0.0299337	0.0299337	0.0299337	0.048781	0.0299337	0.0299337	0.0299337	0.048781	0.0299337	0.0299337	0.0615188	0.0615188	0.0299337	0.0299337
2020	3580	0.0615371	0.0615371	0.0615371	0.0615371	0.0615371	0.0615371	0.0299481	0.0299481	0.0299481	0.0299481	0.0615371	0.0615371	0.0299481	0.0299481	0.0299481	0.0488536	0.0299481	0.0299481	0.0299481	0.0488536	0.0299481	0.0299481	0.0615371	0.0615371	0.0299481	0.0299481
2020	3600	0.0615713	0.0615713	0.0615713	0.0615713	0.0615713	0.0615713	0.029966	0.029966	0.029966	0.029966	0.0615713	0.0615713	0.029966	0.029966	0.029966	0.0488645	0.029966	0.029966	0.029966	0.0488645	0.029966	0.029966	0.0615713	0.0615713	0.029966	0.029966
2020	3620	0.0615757	0.0615757	0.0615757	0.0615757	0.0615757	0.0615757	0.0299917	0.0299917	0.0299917	0.0299917	0.0615757	0.0615757	0.0299917	0.0299917	0.0299917	0.0488699	0.0299917	0.0299917	0.0299917	0.0488699	0.0299917	0.0299917	0.0615757	0.0615757	0.0299917	0.0299917
2020	3640	0.0615843	0.0615843	0.0615843	0.0615843	0.0615843	0.0615843	0.0300068	0.0300068	0.0300068	0.0300068	0.0615843	0.0615843	0.0300068	0.0300068	0.0300068	0.0488717	0.0300068	0.0300068	0.0300068	0.0488717	0.0300068	0.0300068	0.0615843	0.0615843	0.0300068	0.0300068
2020	3660	0.0616178	0.0616178	0.0616178	0.0616178	0.0616178	0.0616178	0.0300079	0.0300079	0.0300079	0.0300079	0.0616178	0.0616178	0.0300079	0.0300079	0.0300079	0.0489183	0.0300079	0.0300079	0.0300079	0.0489183	0.0300079	0.0300079	0.0616178	0.0616178	0.0300079	0.0300079
2020	3680	0.0616366	0.0616366	0.0616366	0.0616366	0.0616366	0.0616366	0.0300079	0.0300079	0.0300079	0.0300079	0.0616366	0.0616366	0.0300079	0.0300079	0.0300079	0.0489903	0.0300079	0.0300079	0.0300079	0.0489903	0.0300079	0.0300079	0.0616366	0.0616366	0.0300079	0.0300079
2020	3700	0.0617125	0.0617125	0.0617125	0.0617125	0.0617125	0.0617125	0.0300133	0.0300133	0.0300133	0.0300133	0.0617125	0.0617125	0.0300133	0.0300133	0.0300133	0.0489903	0.0300133	0.0300133	0.0300133	0.0489903	0.0300133	0.0300133	0.0617125	0.0617125	0.0300133	0.0300133
2020	3720	0.0617289	0.0617289	0.0617289	0.0617289	0.0617289	0.0617289	0.0300133	0.0300133	0.0300133	0.0300133	0.0617289	0.0617289	0.0300133	0.0300133	0.0300133	0.0490014	0.0300133	0.0300133	0.0300133	0.0490014	0.0300133	0.0300133	0.0617289	0.0617289	0.0300133	0.0300133
2020	3740	0.0618065	0.0618065	0.0618065	0.0618065	0.0618065	0.0618065	0.0300133	0.0300133	0.0300133	0.0300133	0.0618065	0.0618065	0.0300133	0.0300133	0.0300133	0.0490014	0.0300133	0.0300133	0.0300133	0.0490014	0.0300133	0.0300133	0.0618065	0.0618065	0.0300133	0.0300133
2020	3760	0.0618119	0.0618119	0.0618119	0.0618119	0.0618119	0.0618119	0.0300133	0.0300133	0.0300133	0.0300133	0.0618119	0.0618119	0.0300133	0.0300133	0.0300133	0.0490014	0.0300133	0.0300133	0.0300133	0.0490014	0.0300133	0.0300133	0.0618119	0.0618119	0.0300133	0.0300133
2020	3780	0.0618663	0.0618663	0.0618663	0.0618663	0.0618663	0.0618663	0.0300133	0.0300133	0.0300133	0.0300133	0.0618663	0.0618663	0.0300133	0.0300133	0.0300133	0.0490186	0.0300133	0.0300133	0.0300133	0.0490186	0.0300133	0.0300133	0.0618663	0.0618663	0.0300133	0.0300133
2020	3800	0.0619095	0.0619095	0.0619095	0.0619095	0.0619095	0.0619095	0.0300133	0.0300133	0.0300133	0.0300133	0.0619095	0.0619095	0.0300133	0.0300133	0.0300133	0.0490291	0.0300133	0.0300133	0.0300133	0.0490291	0.0300133	0.0300133	0.0619095	0.0619095	0.0300133	0.0300133
2020	3820	0.0619095	0.0619095	0.0619095	0.0619095	0.0619095	0.0619095	0.0300133	0.0300133	0.0300133	0.0300133	0.0619095	0.0619095	0.0300133	0.0300133	0.0300133	0.0490291	0.0300133	0.0300133	0.0300133	0.0490291	0.0300133	0.0300133	0.0619095	0.0619095	0.0300133	0.0300133
2020	3840	0.0619769	0.0619769	0.0619769	0.0619769	0.0619769	0.0619769	0.0300133	0.0300133	0.0300133	0.0300133	0.0619769	0.0619769	0.0300133	0.0300133	0.0300133	0.0490291	0.0300133	0.0300133	0.0300133	0.0490291	0.0300133	0.0300133	0.0619769	0.0619769	0.0300133	0.0300133
2020	3860	0.0620445	0.0620445	0.0620445	0.0620445	0.0620445	0.0620445	0.0300133	0.0300133	0.0300133	0.0300133	0.0620445	0.0620445	0.0300133	0.0300133	0.0300133	0.0490291	0.0300133	0.0300133	0.0300133	0.0490291	0.0300133	0.0300133	0.0620445	0.0620445	0.0300133	0.0300133
2020	3880	0.0620586	0.0620586	0.0620586	0.0620586	0.0620586	0.0620586	0.0300133	0.0300133	0.0300133	0.0300133	0.0620586	0.0620586	0.0300133	0.0300133	0.0300133	0.0490291	0.0300133	0.0300133	0.0300133	0.0490291	0.0300133	0.0300133	0.0620586	0.0620586	0.0300133	0.0300133
2020	3900	0.0620823	0.0620823	0.0620823	0.0620823	0.0620823	0.0620823	0.0300133	0.0300133	0.0300133	0.0300133	0.0620823	0.0620823	0.0300133	0.0300133	0.0300133	0.0490304	0.0300133	0.0300133	0.0300133	0.0490304	0.0300133	0.0300133	0.0620823	0.0620823	0.0300133	0.0300133
2020	3920	0.0620932	0.0620932	0.0620932	0.0620932	0.0620932	0.0620932	0.0300133	0.0300133	0.0300133	0.0300133	0.0620932	0.0620932	0.0300133	0.0300133	0.0300133	0.0490304	0.0300133	0.0300133	0.0300133	0.0490304	0.0300133	0.0300133	0.0620932	0.0620932	0.0300133	0.0300133
2020	3940	0.0621221	0.0621221	0.0621221	0.0621221	0.0621221	0.0621221	0.0300133	0.0300133	0.0300133	0.0300133	0.0621221	0.0621221	0.0300133	0.0300133	0.0300133	0.0490363	0.0300133	0.0300133	0.0300133	0.0490363	0.0300133	0.0300133	0.0621221	0.0621221	0.0300133	0.0300133
2020	3960	0.0621221	0.0621221	0.0621221	0.0621221	0.0621221	0.0621221	0.0300133	0.0300133	0.0300133	0.0300133	0.0621221	0.0621221	0.0300133	0.0300133	0.0300133	0.0490461	0.0300133	0.0300133	0.0300133	0.0490461	0.0300133	0.0300133	0.0621221	0.0621221	0.0300133	0.0300133
2020	3980	0.0621221	0.0621221	0.0621221	0.0621221	0.0621221	0.0621221	0.0300133	0.0300133	0.0300133	0.0300133	0.0621221	0.0621221	0.0300133	0.0300133	0.0300133	0.0490461	0.0300133	0.0300133	0.0300133	0.0490461	0.0300133	0.0300133	0.0621221	0.0621221	0.0300133	0.0300133
2020	4000	0.0621331	0.0621331	0.0621331	0.0621331	0.0621331	0.0621331	0.0300133	0.0300133	0.0300133	0.0300133	0.0621331	0.0621331	0.0300133	0.0300133	0.0300133	0.0490461	0.0300133	0.0300133	0.0300133	0.0490461	0.0300133	0.0300133	0.0621331	0.0621331	0.0300133	0.0300133
2050	0	0	0	0	0	0	0	0	0	0	0	0	0	0	0	0	0	0	0	0	0	0	0	0	0	0	0
2050	20	0.0825309	0.0825309	0.0825309	0.0825309	0.0825309	0.0825309	0.0404029	0.0404029	0.0404029	0.0404029	0.0825309	0.0825309	0.0404029	0.0404029	0.0404029	0.0658086	0.0404029	0.0404029	0.0404029	0.0658086	0.0404029	0.0404029	0.0825309	0.0825309	0.0404029	0.0404029
2050	40	0.0871065	0.0871065	0.0871065	0.0871065	0.0871065	0.0871065	0.0426025	0.0426025	0.0426025	0.0426025	0.0871065	0.0871065	0.0426025	0.0426025	0.0426025	0.0687459	0.0426025	0.0426025	0.0426025	0.0687459	0.0426025	0.0426025	0.0871065	0.0871065	0.0426025	0.0426025
2050	60	0.0911215	0.0911215	0.0911215	0.0911215	0.0911215	0.0911215	0.0453977	0.0453977	0.0453977	0.0453977	0.0911215	0.0911215	0.0453977	0.0453977	0.0453977	0.0731008	0.0453977	0.0453977	0.0453977	0.0731008	0.0453977	0.0453977	0.0911215	0.0911215	0.0453977	0.0453977
2050	80	0.0972086	0.0972086	0.0972086	0.0972086	0.0972086	0.0972086	0.0485085	0.0485085	0.0485085	0.0485085	0.0972086	0.0972086	0.0485085	0.0485085	0.0485085	0.0778246	0.0485085	0.0485085	0.0485085	0.0778246	0.0485085	0.0485085	0.0972086	0.0972086	0.0485085	0.0485085
2050	100	0.10239	0.10239	0.10239	0.10239	0.10239	0.10239	0.0509002	0.0509002	0.0509002	0.0509002	0.10239	0.10239	0.0509002	0.0509002	0.0509002	0.0820279	0.0509002	0.0509002	0.0509002	0.0820279	0.0509002	0.0509002	0.10239	0.10239	0.0509002	0.0509002
2050	120	0.107493	0.107493	0.107493	0.107493	0.107493	0.107493	0.0539659	0.0539659	0.0539659	0.0539659	0.107493	0.107493	0.0539659	0.0539659	0.0539659	0.0857619	0.0539659	0.0539659	0.0539659	0.0857619	0.0539659	0.0539659	0.107493	0.107493	0.0539659	0.0539659
2050	140	0.11378	0.11378	0.11378	0.11378	0.11378	0.11378	0.0566374	0.0566374	0.0566374	0.0566374	0.11378	0.11378	0.0566374	0.0566374	0.0566374	0.0901024	0.0566374	0.0566374	0.0566374	0.0901024	0.0566374	0.0566374	0.11378	0.11378	0.0566374	0.0566374
2050	160	0.118201	0.118201	0.118201	0.118201	0.118201	0.118201	0.059675	0.059675	0.059675	0.059675	0.118201	0.118201	0.059675	0.059675	0.059675	0.0944217	0.059675	0.059675	0.059675	0.0944217	0.059675	0.059675	0.118201	0.118201	0.059675	0.059675
2050	180	0.122772	0.122772	0.122772	0.122772	0.122772	0.122772	0.0622643	0.0622643	0.0622643	0.0622643	0.122772	0.122772	0.0622643	0.0622643	0.0622643	0.0986776	0.0622643	0.0622643	0.0622643	0.0986776	0.0622643	0.0622643	0.122772	0.122772	0.0622643	0.0622643
2050	200	0.12818	0.12818	0.12818	0.12818	0.12818	0.12818	0.064642	0.064642	0.064642	0.064642	0.12818	0.12818	0.064642	0.064642	0.064642	0.102957	0.064642	0.064642	0.064642	0.102957	0.064642	0.064642	0.12818	0.12818	0.064642	0.064642
2050	220	0.132315	0.132315	0.132315	0.132315	0.132315	0.132315	0.0665187	0.0665187	0.0665187	0.0665187	0.132315	0.132315	0.0665187	0.0665187	0.0665187	0.106608	0.0665187	0.0665187	0.0665187	0.106608	0.0665187	0.0665187	0.132315	0.132315	0.0665187	0.0665187
2050	240	0.133648	0.133648	0.133648	0.133648	0.133648	0.133648	0.0667138	0.0667138	0.0667138	0.0667138	0.133648	0.133648	0.0667138	0.0667138	0.0667138	0.107028	0.0667138	0.0667138	0.0667138	0.107028	0.0667138	0.0667138	0.133648	0.133648	0.0667138	0.0667138
2050	260	0.133862	0.133862	0.133862	0.133862	0.133862	0.133862	0.0668985	0.0668985	0.0668985	0.0668985	0.133862	0.133862	0.0668985	0.0668985	0.0668985	0.107277	0.0668985	0.0668985	0.0668985	0.107277	0.0668985	0.0668985	0.133862	0.133862	0.0668985	0.0668985
2050	280	0.134226	0.134226	0.134226	0.134226	0.134226	0.134226	0.0670404	0.0670404	0.0670404	0.0670404	0.134226	0.134226	0.0670404	0.0670404	0.0670404	0.107581	0.0670404	0.0670404	0.0670404	0.107581	0.0670404	0.0670404	0.134226	0.134226	0.0670404	0.0670404
2050	300	0.134558	0.134558	0.134558	0.134558	0.134558	0.134558	0.0671977	0.0671977	0.0671977	0.0671977	0.134558	0.134558	0.0671977	0.0671977	0.0671977	0.107918	0.0671977	0.0671977	0.0671977	0.107918	0.0671977	0.0671977	0.134558	0.134558	0.0671977	0.0671977
2050	320	0.134842	0.134842	0.134842	0.134842	0.134842	0.134842	0.0674421	0.0674421	0.0674421	0.0674421	0.134842	0.134842	0.0674421	0.0674421	0.0674421	0.108238	0.0674421	0.0674421	0.0674421	0.108238	0.0674421	0.0674421	0.134842	0.134842	0.0674421	0.0674421
2050	340	0.134992	0.134992	0.134992	0.134992	0.134992	0.134992	0.0675679	0.0675679	0.0675679	0.0675679	0.134992	0.134992	0.0675679	0.0675679	0.0675679	0.108434	0.0675679	0.0675679	0.0675679	0.108434	0.0675679	0.0675679	0.134992	0.134992	0.0675679	0.0675679
2050	360	0.135349	0.135349	0.135349	0.135349	0.135349	0.135349	0.0676045	0.0676045	0.0676045	0.0676045	0.135349	0.135349	0.0676045	0.0676045	0.0676045	0.108802	0.0676045	0.0676045	0.0676045	0.108802	0.0676045	0.0676045	0.135349	0.135349	0.0676045	0.0676045
2050	380	0.13552	0.13552	0.13552	0.13552	0.13552	0.13552	0.0676912	0.0676912	0.0676912	0.0676912	0.13552	0.13552	0.0676912	0.0676912	0.0676912	0.109094	0.0676912	0.0676912	0.0676912	0.109094	0.0676912	0.0676912	0.13552	0.13552	0.0676912	0.0676912
2050	400	0.136311	0.136311	0.136311	0.136311	0.136311	0.136311	0.067846	0.067846	0.067846	0.067846	0.136311	0.136311	0.067846	0.067846	0.067846	0.109209	0.067846	0.067846	0.067846	0.109209	0.067846	0.067846	0.136311	0.136311	0.067846	0.067846
2050	420	0.136791	0.136791	0.136791	0.136791	0.136791	0.136791	0.067948	0.067948	0.067948	0.067948	0.136791	0.136791	0.067948	0.067948	0.067948	0.10962	0.067948	0.067948	0.067948	0.10962	0.067948	0.067948	0.136791	0.136791	0.067948	0.067948
2050	440	0.137073	0.137073	0.137073	0.137073	0.137073	0.137073	0.0681354	0.0681354	0.0681354	0.0681354	0.137073	0.137073	0.0681354	0.0681354	0.0681354	0.109972	0.0681354	0.0681354	0.0681354	0.109972	0.0681354	0.0681354	0.137073	0.137073	0.0681354	0.0681354
2050	460	0.137504	0.137504	0.137504	0.137504	0.137504	0.137504	0.0684612	0.0684612	0.0684612	0.0684612	0.137504	0.137504	0.0684612	0.0684612	0.0684612	0.110298	0.0684612	0.0684612	0.0684612	0.110298	0.0684612	0.0684612	0.137504	0.137504	0.0684612	0.0684612
2050	480	0.138066	0.138066	0.138066	0.138066	0.138066	0.138066	0.0686819	0.0686819	0.0686819	0.0686819	0.138066	0.138066	0.0686819	0.0686819	0.0686819	0.110463	0.0686819	0.0686819	0.0686819	0.110463	0.0686819	0.0686819	0.138066	0.138066	0.0686819	0.0686819
2050	500	0.138412	0.138412	0.138412	0.138412	0.138412	0.138412	0.0689404	0.0689404	0.0689404	0.0689404	0.138412	0.138412	0.0689404	0.0689404	0.0689404	0.110818	0.0689404	0.0689404	0.0689404	0.110818	0.0689404	0.0689404	0.138412	0.138412	0.0689404	0.0689404
2050	520	0.138771	0.138771	0.138771	0.138771	0.138771	0.138771	0.0690985	0.0690985	0.0690985	0.0690985	0.138771	0.138771	0.0690985	0.0690985	0.0690985	0.111089	0.0690985	0.0690985	0.0690985	0.111089	0.0690985	0.0690985	0.138771	0.138771	0.0690985	0.0690985
2050	540	0.139271	0.139271	0.139271	0.139271	0.139271	0.139271	0.0692196	0.0692196	0.0692196	0.0692196	0.139271	0.139271	0.0692196	0.0692196	0.0692196	0.111456	0.0692196	0.0692196	0.0692196	0.111456	0.0692196	0.0692196	0.139271	0.139271	0.0692196	0.0692196
2050	560	0.139413	0.139413	0.139413	0.139413	0.139413	0.139413	0.0693412	0.0693412	0.0693412	0.0693412	0.139413	0.139413	0.0693412	0.0693412	0.0693412	0.111746	0.0693412	0.0693412	0.0693412	0.111746	0.0693412	0.0693412	0.139413	0.139413	0.0693412	0.0693412
2050	580	0.139521	0.139521	0.139521	0.139521	0.139521	0.139521	0.0694742	0.0694742	0.0694742	0.0694742	0.139521	0.139521	0.0694742	0.0694742	0.0694742	0.11198	0.0694742	0.0694742	0.0694742	0.11198	0.0694742	0.0694742	0.139521	0.139521	0.0694742	0.0694742
2050	600	0.139746	0.139746	0.139746	0.139746	0.139746	0.139746	0.0697285	0.0697285	0.0697285	0.0697285	0.139746	0.139746	0.0697285	0.0697285	0.0697285	0.11226	0.0697285	0.0697285	0.0697285	0.11226	0.0697285	0.0697285	0.139746	0.139746	0.0697285	0.0697285
2050	620	0.140196	0.140196	0.140196	0.140196	0.140196	0.140196	0.0698313	0.0698313	0.0698313	0.0698313	0.140196	0.140196	0.0698313	0.0698313	0.0698313	0.112627	0.0698313	0.0698313	0.0698313	0.112627	0.0698313	0.0698313	0.140196	0.140196	0.0698313	0.0698313
2050	640	0.140458	0.140458	0.140458	0.140458	0.140458	0.140458	0.0701408	0.0701408	0.0701408	0.0701408	0.140458	0.140458	0.0701408	0.0701408	0.0701408	0.112956	0.0701408	0.0701408	0.0701408	0.112956	0.0701408	0.0701408	0.140458	0.140458	0.0701408	0.0701408
2050	660	0.141182	0.141182	0.141182	0.141182	0.141182	0.141182	0.0703268	0.0703268	0.0703268	0.0703268	0.141182	0.141182	0.0703268	0.0703268	0.0703268	0.113145	0.0703268	0.0703268	0.0703268	0.113145	0.0703268	0.0703268	0.141182	0.141182	0.0703268	0.0703268
2050	680	0.141601	0.141601	0.141601	0.141601	0.141601	0.141601	0.0706783	0.0706783	0.0706783	0.0706783	0.141601	0.141601	0.0706783	0.0706783	0.0706783	0.11345	0.0706783	0.0706783	0.0706783	0.11345	0.0706783	0.0706783	0.141601	0.141601	0.0706783	0.0706783
2050	700	0.142069	0.142069	0.142069	0.142069	0.142069	0.142069	0.0708254	0.0708254	0.0708254	0.0708254	0.142069	0.142069	0.0708254	0.0708254	0.0708254	0.113697	0.0708254	0.0708254	0.0708254	0.113697	0.0708254	0.0708254	0.142069	0.142069	0.0708254	0.0708254
2050	720	0.142392	0.142392	0.142392	0.142392	0.142392	0.142392	0.0709489	0.0709489	0.0709489	0.0709489	0.142392	0.142392	0.0709489	0.0709489	0.0709489	0.114034	0.0709489	0.0709489	0.0709489	0.114034	0.0709489	0.0709489	0.142392	0.142392	0.0709489	0.0709489
2050	740	0.142711	0.142711	0.142711	0.142711	0.142711	0.142711	0.0711786	0.0711786	0.0711786	0.0711786	0.142711	0.142711	0.0711786	0.0711786	0.0711786	0.11442	0.0711786	0.0711786	0.0711786	0.11442	0.0711786	0.0711786	0.142711	0.142711	0.0711786	0.0711786
2050	760	0.143107	0.143107	0.143107	0.143107	0.143107	0.143107	0.0714621	0.0714621	0.0714621	0.0714621	0.143107	0.143107	0.0714621	0.0714621	0.0714621	0.114636	0.0714621	0.0714621	0.0714621	0.114636	0.0714621	0.0714621	0.143107	0.143107	0.0714621	0.0714621
2050	780	0.143605	0.143605	0.143605	0.143605	0.143605	0.143605	0.0716978	0.0716978	0.0716978	0.0716978	0.143605	0.143605	0.0716978	0.0716978	0.0716978	0.114796	0.0716978	0.0716978	0.0716978	0.114796	0.0716978	0.0716978	0.143605	0.143605	0.0716978	0.0716978
2050	800	0.144058	0.144058	0.144058	0.144058	0.144058	0.144058	0.0718415	0.0718415	0.0718415	0.0718415	0.144058	0.144058	0.0718415	0.0718415	0.0718415	0.115488	0.0718415	0.0718415	0.0718415	0.115488	0.0718415	0.0718415	0.144058	0.144058	0.0718415	0.0718415
2050	820	0.144487	0.144487	0.144487	0.144487	0.144487	0.144487	0.0721661	0.0721661	0.0721661	0.0721661	0.144487	0.144487	0.0721661	0.0721661	0.0721661	0.115755	0.0721661	0.0721661	0.0721661	0.115755	0.0721661	0.0721661	0.144487	0.144487	0.0721661	0.0721661
2050	840	0.145034	0.145034	0.145034	0.145034	0.145034	0.145034	0.0724654	0.0724654	0.0724654	0.0724654	0.145034	0.145034	0.0724654	0.0724654	0.0724654	0.116027	0.0724654	0.0724654	0.0724654	0.116027	0.0724654	0.0724654	0.145034	0.145034	0.0724654	0.0724654
2050	860	0.145469	0.145469	0.145469	0.145469	0.145469	0.145469	0.0727033	0.0727033	0.0727033	0.0727033	0.145469	0.145469	0.0727033	0.0727033	0.0727033	0.116232	0.0727033	0.0727033	0.0727033	0.116232	0.0727033	0.0727033	0.145469	0.145469	0.0727033	0.0727033
2050	880	0.145856	0.145856	0.145856	0.145856	0.145856	0.145856	0.0728589	0.0728589	0.0728589	0.0728589	0.145856	0.145856	0.0728589	0.0728589	0.0728589	0.116655	0.0728589	0.0728589	0.0728589	0.116655	0.0728589	0.0728589	0.145856	0.145856	0.0728589	0.0728589
2050	900	0.146384	0.146384	0.146384	0.146384	0.146384	0.146384	0.0730183	0.0730183	0.0730183	0.0730183	0.146384	0.146384	0.0730183	0.0730183	0.0730183	0.116757	0.0730183	0.0730183	0.0730183	0.116757	0.0730183	0.0730183	0.146384	0.146384	0.0730183	0.0730183
2050	920	0.146584	0.146584	0.146584	0.146584	0.146584	0.146584	0.0732743	0.0732743	0.0732743	0.0732743	0.146584	0.146584	0.0732743	0.0732743	0.0732743	0.117261	0.0732743	0.0732743	0.0732743	0.117261	0.0732743	0.0732743	0.146584	0.146584	0.0732743	0.0732743
2050	940	0.146707	0.146707	0.146707	0.146707	0.146707	0.146707	0.0734203	0.0734203	0.0734203	0.0734203	0.146707	0.146707	0.0734203	0.0734203	0.0734203	0.117574	0.0734203	0.0734203	0.0734203	0.117574	0.0734203	0.0734203	0.146707	0.146707	0.0734203	0.0734203
2050	960	0.146993	0.146993	0.146993	0.146993	0.146993	0.146993	0.0737718	0.0737718	0.0737718	0.0737718	0.146993	0.146993	0.0737718	0.0737718	0.0737718	0.117919	0.0737718	0.0737718	0.0737718	0.117919	0.0737718	0.0737718	0.146993	0.146993	0.0737718	0.0737718
2050	980	0.147355	0.147355	0.147355	0.147355	0.147355	0.147355	0.0740552	0.0740552	0.0740552	0.0740552	0.147355	0.147355	0.0740552	0.0740552	0.0740552	0.118429	0.0740552	0.0740552	0.0740552	0.118429	0.0740552	0.0740552	0.147355	0.147355	0.0740552	0.0740552
2050	1000	0.147899	0.147899	0.147899	0.147899	0.147899	0.147899	0.0741538	0.0741538	0.0741538	0.0741538	0.147899	0.147899	0.0741538	0.0741538	0.0741538	0.11861	0.0741538	0.0741538	0.0741538	0.11861	0.0741538	0.0741538	0.147899	0.147899	0.0741538	0.0741538
2050	1020	0.14842	0.14842	0.14842	0.14842	0.14842	0.14842	0.0743742	0.0743742	0.0743742	0.0743742	0.14842	0.14842	0.0743742	0.0743742	0.0743742	0.119033	0.0743742	0.0743742	0.0743742	0.119033	0.0743742	0.0743742	0.14842	0.14842	0.0743742	0.0743742
2050	1040	0.14867	0.14867	0.14867	0.14867	0.14867	0.14867	0.0745557	0.0745557	0.0745557	0.0745557	0.14867	0.14867	0.0745557	0.0745557	0.0745557	0.119233	0.0745557	0.0745557	0.0745557	0.119233	0.0745557	0.0745557	0.14867	0.14867	0.0745557	0.0745557
2050	1060	0.149129	0.149129	0.149129	0.149129	0.149129	0.149129	0.0747273	0.0747273	0.0747273	0.0747273	0.149129	0.149129	0.0747273	0.0747273	0.0747273	0.119784	0.0747273	0.0747273	0.0747273	0.119784	0.0747273	0.0747273	0.149129	0.149129	0.0747273	0.0747273
2050	1080	0.149665	0.149665	0.149665	0.149665	0.149665	0.149665	0.0749404	0.0749404	0.0749404	0.0749404	0.149665	0.149665	0.0749404	0.0749404	0.0749404	0.120073	0.0749404	0.0749404	0.0749404	0.120073	0.0749404	0.0749404	0.149665	0.149665	0.0749404	0.0749404
2050	1100	0.15003	0.15003	0.15003	0.15003	0.15003	0.15003	0.0751968	0.0751968	0.0751968	0.0751968	0.15003	0.15003	0.0751968	0.0751968	0.0751968	0.120345	0.0751968	0.0751968	0.0751968	0.120345	0.0751968	0.0751968	0.15003	0.15003	0.0751968	0.0751968
2050	1120	0.150873	0.150873	0.150873	0.150873	0.150873	0.150873	0.0753912	0.0753912	0.0753912	0.0753912	0.150873	0.150873	0.0753912	0.0753912	0.0753912	0.120595	0.0753912	0.0753912	0.0753912	0.120595	0.0753912	0.0753912	0.150873	0.150873	0.0753912	0.0753912
2050	1140	0.151265	0.151265	0.151265	0.151265	0.151265	0.151265	0.0755775	0.0755775	0.0755775	0.0755775	0.151265	0.151265	0.0755775	0.0755775	0.0755775	0.121013	0.0755775	0.0755775	0.0755775	0.121013	0.0755775	0.0755775	0.151265	0.151265	0.0755775	0.0755775
2050	1160	0.151718	0.151718	0.151718	0.151718	0.151718	0.151718	0.0756712	0.0756712	0.0756712	0.0756712	0.151718	0.151718	0.0756712	0.0756712	0.0756712	0.121463	0.0756712	0.0756712	0.0756712	0.121463	0.0756712	0.0756712	0.151718	0.151718	0.0756712	0.0756712
2050	1180	0.152104	0.152104	0.152104	0.152104	0.152104	0.152104	0.0761415	0.0761415	0.0761415	0.0761415	0.152104	0.152104	0.0761415	0.0761415	0.0761415	0.122249	0.0761415	0.0761415	0.0761415	0.122249	0.0761415	0.0761415	0.152104	0.152104	0.0761415	0.0761415
2050	1200	0.152421	0.152421	0.152421	0.152421	0.152421	0.152421	0.0764144	0.0764144	0.0764144	0.0764144	0.152421	0.152421	0.0764144	0.0764144	0.0764144	0.122827	0.0764144	0.0764144	0.0764144	0.122827	0.0764144	0.0764144	0.152421	0.152421	0.0764144	0.0764144
2050	1220	0.152706	0.152706	0.152706	0.152706	0.152706	0.152706	0.0767753	0.0767753	0.0767753	0.0767753	0.152706	0.152706	0.0767753	0.0767753	0.0767753	0.123253	0.0767753	0.0767753	0.0767753	0.123253	0.0767753	0.0767753	0.152706	0.152706	0.0767753	0.0767753
2050	1240	0.153052	0.153052	0.153052	0.153052	0.153052	0.153052	0.0769694	0.0769694	0.0769694	0.0769694	0.153052	0.153052	0.0769694	0.0769694	0.0769694	0.123576	0.0769694	0.0769694	0.0769694	0.123576	0.0769694	0.0769694	0.153052	0.153052	0.0769694	0.0769694
2050	1260	0.153551	0.153551	0.153551	0.153551	0.153551	0.153551	0.0773374	0.0773374	0.0773374	0.0773374	0.153551	0.153551	0.0773374	0.0773374	0.0773374	0.124216	0.0773374	0.0773374	0.0773374	0.124216	0.0773374	0.0773374	0.153551	0.153551	0.0773374	0.0773374
2050	1280	0.153874	0.153874	0.153874	0.153874	0.153874	0.153874	0.0778454	0.0778454	0.0778454	0.0778454	0.153874	0.153874	0.0778454	0.0778454	0.0778454	0.124488	0.0778454	0.0778454	0.0778454	0.124488	0.0778454	0.0778454	0.153874	0.153874	0.0778454	0.0778454
2050	1300	0.154144	0.154144	0.154144	0.154144	0.154144	0.154144	0.0782889	0.0782889	0.0782889	0.0782889	0.154144	0.154144	0.0782889	0.0782889	0.0782889	0.124714	0.0782889	0.0782889	0.0782889	0.124714	0.0782889	0.0782889	0.154144	0.154144	0.0782889	0.0782889
2050	1320	0.154532	0.154532	0.154532	0.154532	0.154532	0.154532	0.0784035	0.0784035	0.0784035	0.0784035	0.154532	0.154532	0.0784035	0.0784035	0.0784035	0.125333	0.0784035	0.0784035	0.0784035	0.125333	0.0784035	0.0784035	0.154532	0.154532	0.0784035	0.0784035
2050	1340	0.15512	0.15512	0.15512	0.15512	0.15512	0.15512	0.0786795	0.0786795	0.0786795	0.0786795	0.15512	0.15512	0.0786795	0.0786795	0.0786795	0.125817	0.0786795	0.0786795	0.0786795	0.125817	0.0786795	0.0786795	0.15512	0.15512	0.0786795	0.0786795
2050	1360	0.155924	0.155924	0.155924	0.155924	0.155924	0.155924	0.0789559	0.0789559	0.0789559	0.0789559	0.155924	0.155924	0.0789559	0.0789559	0.0789559	0.126404	0.0789559	0.0789559	0.0789559	0.126404	0.0789559	0.0789559	0.155924	0.155924	0.0789559	0.0789559
2050	1380	0.156378	0.156378	0.156378	0.156378	0.156378	0.156378	0.079553	0.079553	0.079553	0.079553	0.156378	0.156378	0.079553	0.079553	0.079553	0.126636	0.079553	0.079553	0.079553	0.126636	0.079553	0.079553	0.156378	0.156378	0.079553	0.079553
2050	1400	0.156709	0.156709	0.156709	0.156709	0.156709	0.156709	0.0796862	0.0796862	0.0796862	0.0796862	0.156709	0.156709	0.0796862	0.0796862	0.0796862	0.127112	0.0796862	0.0796862	0.0796862	0.127112	0.0796862	0.0796862	0.156709	0.156709	0.0796862	0.0796862
2050	1420	0.156891	0.156891	0.156891	0.156891	0.156891	0.156891	0.0801548	0.0801548	0.0801548	0.0801548	0.156891	0.156891	0.0801548	0.0801548	0.0801548	0.12744	0.0801548	0.0801548	0.0801548	0.12744	0.0801548	0.0801548	0.156891	0.156891	0.0801548	0.0801548
2050	1440	0.157206	0.157206	0.157206	0.157206	0.157206	0.157206	0.0803773	0.0803773	0.0803773	0.0803773	0.157206	0.157206	0.0803773	0.0803773	0.0803773	0.127747	0.0803773	0.0803773	0.0803773	0.127747	0.0803773	0.0803773	0.157206	0.157206	0.0803773	0.0803773
2050	1460	0.157638	0.157638	0.157638	0.157638	0.157638	0.157638	0.0805123	0.0805123	0.0805123	0.0805123	0.157638	0.157638	0.0805123	0.0805123	0.0805123	0.128133	0.0805123	0.0805123	0.0805123	0.128133	0.0805123	0.0805123	0.157638	0.157638	0.0805123	0.0805123
2050	1480	0.158317	0.158317	0.158317	0.158317	0.158317	0.158317	0.0807795	0.0807795	0.0807795	0.0807795	0.158317	0.158317	0.0807795	0.0807795	0.0807795	0.128472	0.0807795	0.0807795	0.0807795	0.128472	0.0807795	0.0807795	0.158317	0.158317	0.0807795	0.0807795
2050	1500	0.158852	0.158852	0.158852	0.158852	0.158852	0.158852	0.08106	0.08106	0.08106	0.08106	0.158852	0.158852	0.08106	0.08106	0.08106	0.128943	0.08106	0.08106	0.08106	0.128943	0.08106	0.08106	0.158852	0.158852	0.08106	0.08106
2050	1520	0.159115	0.159115	0.159115	0.159115	0.159115	0.159115	0.0813901	0.0813901	0.0813901	0.0813901	0.159115	0.159115	0.0813901	0.0813901	0.0813901	0.129415	0.0813901	0.0813901	0.0813901	0.129415	0.0813901	0.0813901	0.159115	0.159115	0.0813901	0.0813901
2050	1540	0.159656	0.159656	0.159656	0.159656	0.159656	0.159656	0.0816821	0.0816821	0.0816821	0.0816821	0.159656	0.159656	0.0816821	0.0816821	0.0816821	0.130134	0.0816821	0.0816821	0.0816821	0.130134	0.0816821	0.0816821	0.159656	0.159656	0.0816821	0.0816821
2050	1560	0.159958	0.159958	0.159958	0.159958	0.159958	0.159958	0.0820199	0.0820199	0.0820199	0.0820199	0.159958	0.159958	0.0820199	0.0820199	0.0820199	0.130477	0.0820199	0.0820199	0.0820199	0.130477	0.0820199	0.0820199	0.159958	0.159958	0.0820199	0.0820199
2050	1580	0.160638	0.160638	0.160638	0.160638	0.160638	0.160638	0.0823446	0.0823446	0.0823446	0.0823446	0.160638	0.160638	0.0823446	0.0823446	0.0823446	0.131012	0.0823446	0.0823446	0.0823446	0.131012	0.0823446	0.0823446	0.160638	0.160638	0.0823446	0.0823446
2050	1600	0.161069	0.161069	0.161069	0.161069	0.161069	0.161069	0.0825373	0.0825373	0.0825373	0.0825373	0.161069	0.161069	0.0825373	0.0825373	0.0825373	0.131279	0.0825373	0.0825373	0.0825373	0.131279	0.0825373	0.0825373	0.161069	0.161069	0.0825373	0.0825373
2050	1620	0.161562	0.161562	0.161562	0.161562	0.161562	0.161562	0.0828127	0.0828127	0.0828127	0.0828127	0.161562	0.161562	0.0828127	0.0828127	0.0828127	0.131598	0.0828127	0.0828127	0.0828127	0.131598	0.0828127	0.0828127	0.161562	0.161562	0.0828127	0.0828127
2050	1640	0.162145	0.162145	0.162145	0.162145	0.162145	0.162145	0.0830632	0.0830632	0.0830632	0.0830632	0.162145	0.162145	0.0830632	0.0830632	0.0830632	0.132195	0.0830632	0.0830632	0.0830632	0.132195	0.0830632	0.0830632	0.162145	0.162145	0.0830632	0.0830632
2050	1660	0.162816	0.162816	0.162816	0.162816	0.162816	0.162816	0.083302	0.083302	0.083302	0.083302	0.162816	0.162816	0.083302	0.083302	0.083302	0.132704	0.083302	0.083302	0.083302	0.132704	0.083302	0.083302	0.162816	0.162816	0.083302	0.083302
2050	1680	0.163472	0.163472	0.163472	0.163472	0.163472	0.163472	0.0836944	0.0836944	0.0836944	0.0836944	0.163472	0.163472	0.0836944	0.0836944	0.0836944	0.133226	0.0836944	0.0836944	0.0836944	0.133226	0.0836944	0.0836944	0.163472	0.163472	0.0836944	0.0836944
2050	1700	0.163853	0.163853	0.163853	0.163853	0.163853	0.163853	0.0840198	0.0840198	0.0840198	0.0840198	0.163853	0.163853	0.0840198	0.0840198	0.0840198	0.133745	0.0840198	0.0840198	0.0840198	0.133745	0.0840198	0.0840198	0.163853	0.163853	0.0840198	0.0840198
2050	1720	0.164566	0.164566	0.164566	0.164566	0.164566	0.164566	0.0843916	0.0843916	0.0843916	0.0843916	0.164566	0.164566	0.0843916	0.0843916	0.0843916	0.134064	0.0843916	0.0843916	0.0843916	0.134064	0.0843916	0.0843916	0.164566	0.164566	0.0843916	0.0843916
2050	1740	0.165138	0.165138	0.165138	0.165138	0.165138	0.165138	0.0847262	0.0847262	0.0847262	0.0847262	0.165138	0.165138	0.0847262	0.0847262	0.0847262	0.134312	0.0847262	0.0847262	0.0847262	0.134312	0.0847262	0.0847262	0.165138	0.165138	0.0847262	0.0847262
2050	1760	0.16565	0.16565	0.16565	0.16565	0.16565	0.16565	0.0849559	0.0849559	0.0849559	0.0849559	0.16565	0.16565	0.0849559	0.0849559	0.0849559	0.134655	0.0849559	0.0849559	0.0849559	0.134655	0.0849559	0.0849559	0.16565	0.16565	0.0849559	0.0849559
2050	1780	0.166429	0.166429	0.166429	0.166429	0.166429	0.166429	0.0851476	0.0851476	0.0851476	0.0851476	0.166429	0.166429	0.0851476	0.0851476	0.0851476	0.135163	0.0851476	0.0851476	0.0851476	0.135163	0.0851476	0.0851476	0.166429	0.166429	0.0851476	0.0851476
2050	1800	0.166867	0.166867	0.166867	0.166867	0.166867	0.166867	0.08525	0.08525	0.08525	0.08525	0.166867	0.166867	0.08525	0.08525	0.08525	0.135646	0.08525	0.08525	0.08525	0.135646	0.08525	0.08525	0.166867	0.166867	0.08525	0.08525
2050	1820	0.167355	0.167355	0.167355	0.167355	0.167355	0.167355	0.0853905	0.0853905	0.0853905	0.0853905	0.167355	0.167355	0.0853905	0.0853905	0.0853905	0.135832	0.0853905	0.0853905	0.0853905	0.135832	0.0853905	0.0853905	0.167355	0.167355	0.0853905	0.0853905
2050	1840	0.168071	0.168071	0.168071	0.168071	0.168071	0.168071	0.0854453	0.0854453	0.0854453	0.0854453	0.168071	0.168071	0.0854453	0.0854453	0.0854453	0.136082	0.0854453	0.0854453	0.0854453	0.136082	0.0854453	0.0854453	0.168071	0.168071	0.0854453	0.0854453
2050	1860	0.168561	0.168561	0.168561	0.168561	0.168561	0.168561	0.0855687	0.0855687	0.0855687	0.0855687	0.168561	0.168561	0.0855687	0.0855687	0.0855687	0.136377	0.0855687	0.0855687	0.0855687	0.136377	0.0855687	0.0855687	0.168561	0.168561	0.0855687	0.0855687
2050	1880	0.16905	0.16905	0.16905	0.16905	0.16905	0.16905	0.0858247	0.0858247	0.0858247	0.0858247	0.16905	0.16905	0.0858247	0.0858247	0.0858247	0.136411	0.0858247	0.0858247	0.0858247	0.136411	0.0858247	0.0858247	0.16905	0.16905	0.0858247	0.0858247
2050	1900	0.169707	0.169707	0.169707	0.169707	0.169707	0.169707	0.0859479	0.0859479	0.0859479	0.0859479	0.169707	0.169707	0.0859479	0.0859479	0.0859479	0.136527	0.0859479	0.0859479	0.0859479	0.136527	0.0859479	0.0859479	0.169707	0.169707	0.0859479	0.0859479
2050	1920	0.170084	0.170084	0.170084	0.170084	0.170084	0.170084	0.085999	0.085999	0.085999	0.085999	0.170084	0.170084	0.085999	0.085999	0.085999	0.136825	0.085999	0.085999	0.085999	0.136825	0.085999	0.085999	0.170084	0.170084	0.085999	0.085999
2050	1940	0.170415	0.170415	0.170415	0.170415	0.170415	0.170415	0.0860541	0.0860541	0.0860541	0.0860541	0.170415	0.170415	0.0860541	0.0860541	0.0860541	0.137059	0.0860541	0.0860541	0.0860541	0.137059	0.0860541	0.0860541	0.170415	0.170415	0.0860541	0.0860541
2050	1960	0.170705	0.170705	0.170705	0.170705	0.170705	0.170705	0.086134	0.086134	0.086134	0.086134	0.170705	0.170705	0.086134	0.086134	0.086134	0.137162	0.086134	0.086134	0.086134	0.137162	0.086134	0.086134	0.170705	0.170705	0.086134	0.086134
2050	1980	0.171006	0.171006	0.171006	0.171006	0.171006	0.171006	0.0861877	0.0861877	0.0861877	0.0861877	0.171006	0.171006	0.0861877	0.0861877	0.0861877	0.137396	0.0861877	0.0861877	0.0861877	0.137396	0.0861877	0.0861877	0.171006	0.171006	0.0861877	0.0861877
2050	2000	0.171276	0.171276	0.171276	0.171276	0.171276	0.171276	0.0863226	0.0863226	0.0863226	0.0863226	0.171276	0.171276	0.0863226	0.0863226	0.0863226	0.137501	0.0863226	0.0863226	0.0863226	0.137501	0.0863226	0.0863226	0.171276	0.171276	0.0863226	0.0863226
2050	2020	0.171614	0.171614	0.171614	0.171614	0.171614	0.171614	0.0864011	0.0864011	0.0864011	0.0864011	0.171614	0.171614	0.0864011	0.0864011	0.0864011	0.137532	0.0864011	0.0864011	0.0864011	0.137532	0.0864011	0.0864011	0.171614	0.171614	0.0864011	0.0864011
2050	2040	0.171764	0.171764	0.171764	0.171764	0.171764	0.171764	0.0864674	0.0864674	0.0864674	0.0864674	0.171764	0.171764	0.0864674	0.0864674	0.0864674	0.137598	0.0864674	0.0864674	0.0864674	0.137598	0.0864674	0.0864674	0.171764	0.171764	0.0864674	0.0864674
2050	2060	0.171967	0.171967	0.171967	0.171967	0.171967	0.171967	0.0865052	0.0865052	0.0865052	0.0865052	0.171967	0.171967	0.0865052	0.0865052	0.0865052	0.137665	0.0865052	0.0865052	0.0865052	0.137665	0.0865052	0.0865052	0.171967	0.171967	0.0865052	0.0865052
2050	2080	0.172036	0.172036	0.172036	0.172036	0.172036	0.172036	0.0865369	0.0865369	0.0865369	0.0865369	0.172036	0.172036	0.0865369	0.0865369	0.0865369	0.137868	0.0865369	0.0865369	0.0865369	0.137868	0.0865369	0.0865369	0.172036	0.172036	0.0865369	0.0865369
2050	2100	0.172252	0.172252	0.172252	0.172252	0.172252	0.172252	0.0866305	0.0866305	0.0866305	0.0866305	0.172252	0.172252	0.0866305	0.0866305	0.0866305	0.13808	0.0866305	0.0866305	0.0866305	0.13808	0.0866305	0.0866305	0.172252	0.172252	0.0866305	0.0866305
2050	2120	0.172408	0.172408	0.172408	0.172408	0.172408	0.172408	0.0867134	0.0867134	0.0867134	0.0867134	0.172408	0.172408	0.0867134	0.0867134	0.0867134	0.138134	0.0867134	0.0867134	0.0867134	0.138134	0.0867134	0.0867134	0.172408	0.172408	0.0867134	0.0867134
2050	2140	0.172487	0.172487	0.172487	0.172487	0.172487	0.172487	0.0867909	0.0867909	0.0867909	0.0867909	0.172487	0.172487	0.0867909	0.0867909	0.0867909	0.138309	0.0867909	0.0867909	0.0867909	0.138309	0.0867909	0.0867909	0.172487	0.172487	0.0867909	0.0867909
2050	2160	0.17252	0.17252	0.17252	0.17252	0.17252	0.17252	0.0868185	0.0868185	0.0868185	0.0868185	0.17252	0.17252	0.0868185	0.0868185	0.0868185	0.138353	0.0868185	0.0868185	0.0868185	0.138353	0.0868185	0.0868185	0.17252	0.17252	0.0868185	0.0868185
2050	2180	0.172586	0.172586	0.172586	0.172586	0.172586	0.172586	0.0869569	0.0869569	0.0869569	0.0869569	0.172586	0.172586	0.0869569	0.0869569	0.0869569	0.138385	0.0869569	0.0869569	0.0869569	0.138385	0.0869569	0.0869569	0.172586	0.172586	0.0869569	0.0869569
2050	2200	0.172676	0.172676	0.172676	0.172676	0.172676	0.172676	0.0870775	0.0870775	0.0870775	0.0870775	0.172676	0.172676	0.0870775	0.0870775	0.0870775	0.138532	0.0870775	0.0870775	0.0870775	0.138532	0.0870775	0.0870775	0.172676	0.172676	0.0870775	0.0870775
2050	2220	0.172786	0.172786	0.172786	0.172786	0.172786	0.172786	0.0871576	0.0871576	0.0871576	0.0871576	0.172786	0.172786	0.0871576	0.0871576	0.0871576	0.138691	0.0871576	0.0871576	0.0871576	0.138691	0.0871576	0.0871576	0.172786	0.172786	0.0871576	0.0871576
2050	2240	0.173159	0.173159	0.173159	0.173159	0.173159	0.173159	0.087243	0.087243	0.087243	0.087243	0.173159	0.173159	0.087243	0.087243	0.087243	0.13873	0.087243	0.087243	0.087243	0.13873	0.087243	0.087243	0.173159	0.173159	0.087243	0.087243
2050	2260	0.173313	0.173313	0.173313	0.173313	0.173313	0.173313	0.0873097	0.0873097	0.0873097	0.0873097	0.173313	0.173313	0.0873097	0.0873097	0.0873097	0.138777	0.0873097	0.0873097	0.0873097	0.138777	0.0873097	0.0873097	0.173313	0.173313	0.0873097	0.0873097
2050	2280	0.173408	0.173408	0.173408	0.173408	0.173408	0.173408	0.0873711	0.0873711	0.0873711	0.0873711	0.173408	0.173408	0.0873711	0.0873711	0.0873711	0.138949	0.0873711	0.0873711	0.0873711	0.138949	0.0873711	0.0873711	0.173408	0.173408	0.0873711	0.0873711
2050	2300	0.173579	0.173579	0.173579	0.173579	0.173579	0.173579	0.0874358	0.0874358	0.0874358	0.0874358	0.173579	0.173579	0.0874358	0.0874358	0.0874358	0.139094	0.0874358	0.0874358	0.0874358	0.139094	0.0874358	0.0874358	0.173579	0.173579	0.0874358	0.0874358
2050	2320	0.173644	0.173644	0.173644	0.173644	0.173644	0.173644	0.0874904	0.0874904	0.0874904	0.0874904	0.173644	0.173644	0.0874904	0.0874904	0.0874904	0.139094	0.0874904	0.0874904	0.0874904	0.139094	0.0874904	0.0874904	0.173644	0.173644	0.0874904	0.0874904
2050	2340	0.173755	0.173755	0.173755	0.173755	0.173755	0.173755	0.087546	0.087546	0.087546	0.087546	0.173755	0.173755	0.087546	0.087546	0.087546	0.139161	0.087546	0.087546	0.087546	0.139161	0.087546	0.087546	0.173755	0.173755	0.087546	0.087546
2050	2360	0.173843	0.173843	0.173843	0.173843	0.173843	0.173843	0.0875715	0.0875715	0.0875715	0.0875715	0.173843	0.173843	0.0875715	0.0875715	0.0875715	0.139351	0.0875715	0.0875715	0.0875715	0.139351	0.0875715	0.0875715	0.173843	0.173843	0.0875715	0.0875715
2050	2380	0.17396	0.17396	0.17396	0.17396	0.17396	0.17396	0.0876288	0.0876288	0.0876288	0.0876288	0.17396	0.17396	0.0876288	0.0876288	0.0876288	0.139516	0.0876288	0.0876288	0.0876288	0.139516	0.0876288	0.0876288	0.17396	0.17396	0.0876288	0.0876288
2050	2400	0.173981	0.173981	0.173981	0.173981	0.173981	0.173981	0.087697	0.087697	0.087697	0.087697	0.173981	0.173981	0.087697	0.087697	0.087697	0.139597	0.087697	0.087697	0.087697	0.139597	0.087697	0.087697	0.173981	0.173981	0.087697	0.087697
2050	2420	0.174141	0.174141	0.174141	0.174141	0.174141	0.174141	0.0877156	0.0877156	0.0877156	0.0877156	0.174141	0.174141	0.0877156	0.0877156	0.0877156	0.139755	0.0877156	0.0877156	0.0877156	0.139755	0.0877156	0.0877156	0.174141	0.174141	0.0877156	0.0877156
2050	2440	0.174288	0.174288	0.174288	0.174288	0.174288	0.174288	0.0878435	0.0878435	0.0878435	0.0878435	0.174288	0.174288	0.0878435	0.0878435	0.0878435	0.139792	0.0878435	0.0878435	0.0878435	0.139792	0.0878435	0.0878435	0.174288	0.174288	0.0878435	0.0878435
2050	2460	0.174439	0.174439	0.174439	0.174439	0.174439	0.174439	0.0879614	0.0879614	0.0879614	0.0879614	0.174439	0.174439	0.0879614	0.0879614	0.0879614	0.139957	0.0879614	0.0879614	0.0879614	0.139957	0.0879614	0.0879614	0.174439	0.174439	0.0879614	0.0879614
2050	2480	0.17445	0.17445	0.17445	0.17445	0.17445	0.17445	0.088047	0.088047	0.088047	0.088047	0.17445	0.17445	0.088047	0.088047	0.088047	0.140198	0.088047	0.088047	0.088047	0.140198	0.088047	0.088047	0.17445	0.17445	0.088047	0.088047
2050	2500	0.174484	0.174484	0.174484	0.174484	0.174484	0.174484	0.0880715	0.0880715	0.0880715	0.0880715	0.174484	0.174484	0.0880715	0.0880715	0.0880715	0.140284	0.0880715	0.0880715	0.0880715	0.140284	0.0880715	0.0880715	0.174484	0.174484	0.0880715	0.0880715
2050	2520	0.174604	0.174604	0.174604	0.174604	0.174604	0.174604	0.0880716	0.0880716	0.0880716	0.0880716	0.174604	0.174604	0.0880716	0.0880716	0.0880716	0.140365	0.0880716	0.0880716	0.0880716	0.140365	0.0880716	0.0880716	0.174604	0.174604	0.0880716	0.0880716
2050	2540	0.174814	0.174814	0.174814	0.174814	0.174814	0.174814	0.0881739	0.0881739	0.0881739	0.0881739	0.174814	0.174814	0.0881739	0.0881739	0.0881739	0.140571	0.0881739	0.0881739	0.0881739	0.140571	0.0881739	0.0881739	0.174814	0.174814	0.0881739	0.0881739
2050	2560	0.1749	0.1749	0.1749	0.1749	0.1749	0.1749	0.0882134	0.0882134	0.0882134	0.0882134	0.1749	0.1749	0.0882134	0.0882134	0.0882134	0.140837	0.0882134	0.0882134	0.0882134	0.140837	0.0882134	0.0882134	0.1749	0.1749	0.0882134	0.0882134
2050	2580	0.175016	0.175016	0.175016	0.175016	0.175016	0.175016	0.0882758	0.0882758	0.0882758	0.0882758	0.175016	0.175016	0.0882758	0.0882758	0.0882758	0.140921	0.0882758	0.0882758	0.0882758	0.140921	0.0882758	0.0882758	0.175016	0.175016	0.0882758	0.0882758
2050	2600	0.175245	0.175245	0.175245	0.175245	0.175245	0.175245	0.088345	0.088345	0.088345	0.088345	0.175245	0.175245	0.088345	0.088345	0.088345	0.141074	0.088345	0.088345	0.088345	0.141074	0.088345	0.088345	0.175245	0.175245	0.088345	0.088345
2050	2620	0.175425	0.175425	0.175425	0.175425	0.175425	0.175425	0.0884903	0.0884903	0.0884903	0.0884903	0.175425	0.175425	0.0884903	0.0884903	0.0884903	0.14125	0.0884903	0.0884903	0.0884903	0.14125	0.0884903	0.0884903	0.175425	0.175425	0.0884903	0.0884903
2050	2640	0.175598	0.175598	0.175598	0.175598	0.175598	0.175598	0.0885909	0.0885909	0.0885909	0.0885909	0.175598	0.175598	0.0885909	0.0885909	0.0885909	0.141448	0.0885909	0.0885909	0.0885909	0.141448	0.0885909	0.0885909	0.175598	0.175598	0.0885909	0.0885909
2050	2660	0.175732	0.175732	0.175732	0.175732	0.175732	0.175732	0.0887116	0.0887116	0.0887116	0.0887116	0.175732	0.175732	0.0887116	0.0887116	0.0887116	0.141608	0.0887116	0.0887116	0.0887116	0.141608	0.0887116	0.0887116	0.175732	0.175732	0.0887116	0.0887116
2050	2680	0.175965	0.175965	0.175965	0.175965	0.175965	0.175965	0.0887173	0.0887173	0.0887173	0.0887173	0.175965	0.175965	0.0887173	0.0887173	0.0887173	0.141779	0.0887173	0.0887173	0.0887173	0.141779	0.0887173	0.0887173	0.175965	0.175965	0.0887173	0.0887173
2050	2700	0.176032	0.176032	0.176032	0.176032	0.176032	0.176032	0.0887742	0.0887742	0.0887742	0.0887742	0.176032	0.176032	0.0887742	0.0887742	0.0887742	0.141819	0.0887742	0.0887742	0.0887742	0.141819	0.0887742	0.0887742	0.176032	0.176032	0.0887742	0.0887742
2050	2720	0.176152	0.176152	0.176152	0.176152	0.176152	0.176152	0.0888086	0.0888086	0.0888086	0.0888086	0.176152	0.176152	0.0888086	0.0888086	0.0888086	0.141897	0.0888086	0.0888086	0.0888086	0.141897	0.0888086	0.0888086	0.176152	0.176152	0.0888086	0.0888086
2050	2740	0.17634	0.17634	0.17634	0.17634	0.17634	0.17634	0.0888841	0.0888841	0.0888841	0.0888841	0.17634	0.17634	0.0888841	0.0888841	0.0888841	0.141954	0.0888841	0.0888841	0.0888841	0.141954	0.0888841	0.0888841	0.17634	0.17634	0.0888841	0.0888841
2050	2760	0.176618	0.176618	0.176618	0.176618	0.176618	0.176618	0.0889653	0.0889653	0.0889653	0.0889653	0.176618	0.176618	0.0889653	0.0889653	0.0889653	0.142019	0.0889653	0.0889653	0.0889653	0.142019	0.0889653	0.0889653	0.176618	0.176618	0.0889653	0.0889653
2050	2780	0.176719	0.176719	0.176719	0.176719	0.176719	0.176719	0.0889938	0.0889938	0.0889938	0.0889938	0.176719	0.176719	0.0889938	0.0889938	0.0889938	0.142074	0.0889938	0.0889938	0.0889938	0.142074	0.0889938	0.0889938	0.176719	0.176719	0.0889938	0.0889938
2050	2800	0.17676	0.17676	0.17676	0.17676	0.17676	0.17676	0.0890148	0.0890148	0.0890148	0.0890148	0.17676	0.17676	0.0890148	0.0890148	0.0890148	0.142244	0.0890148	0.0890148	0.0890148	0.142244	0.0890148	0.0890148	0.17676	0.17676	0.0890148	0.0890148
2050	2820	0.176878	0.176878	0.176878	0.176878	0.176878	0.176878	0.0890371	0.0890371	0.0890371	0.0890371	0.176878	0.176878	0.0890371	0.0890371	0.0890371	0.142346	0.0890371	0.0890371	0.0890371	0.142346	0.0890371	0.0890371	0.176878	0.176878	0.0890371	0.0890371
2050	2840	0.17699	0.17699	0.17699	0.17699	0.17699	0.17699	0.0891132	0.0891132	0.0891132	0.0891132	0.17699	0.17699	0.0891132	0.0891132	0.0891132	0.142488	0.0891132	0.0891132	0.0891132	0.142488	0.0891132	0.0891132	0.17699	0.17699	0.0891132	0.0891132
2050	2860	0.177114	0.177114	0.177114	0.177114	0.177114	0.177114	0.0891792	0.0891792	0.0891792	0.0891792	0.177114	0.177114	0.0891792	0.0891792	0.0891792	0.142496	0.0891792	0.0891792	0.0891792	0.142496	0.0891792	0.0891792	0.177114	0.177114	0.0891792	0.0891792
2050	2880	0.177243	0.177243	0.177243	0.177243	0.177243	0.177243	0.0892055	0.0892055	0.0892055	0.0892055	0.177243	0.177243	0.0892055	0.0892055	0.0892055	0.142543	0.0892055	0.0892055	0.0892055	0.142543	0.0892055	0.0892055	0.177243	0.177243	0.0892055	0.0892055
2050	2900	0.177375	0.177375	0.177375	0.177375	0.177375	0.177375	0.0893422	0.0893422	0.0893422	0.0893422	0.177375	0.177375	0.0893422	0.0893422	0.0893422	0.142574	0.0893422	0.0893422	0.0893422	0.142574	0.0893422	0.0893422	0.177375	0.177375	0.0893422	0.0893422
2050	2920	0.177591	0.177591	0.177591	0.177591	0.177591	0.177591	0.0894195	0.0894195	0.0894195	0.0894195	0.177591	0.177591	0.0894195	0.0894195	0.0894195	0.142666	0.0894195	0.0894195	0.0894195	0.142666	0.0894195	0.0894195	0.177591	0.177591	0.0894195	0.0894195
2050	2940	0.17785	0.17785	0.17785	0.17785	0.17785	0.17785	0.089542	0.089542	0.089542	0.089542	0.17785	0.17785	0.089542	0.089542	0.089542	0.142854	0.089542	0.089542	0.089542	0.142854	0.089542	0.089542	0.17785	0.17785	0.089542	0.089542
2050	2960	0.177852	0.177852	0.177852	0.177852	0.177852	0.177852	0.0897473	0.0897473	0.0897473	0.0897473	0.177852	0.177852	0.0897473	0.0897473	0.0897473	0.14293	0.0897473	0.0897473	0.0897473	0.14293	0.0897473	0.0897473	0.177852	0.177852	0.0897473	0.0897473
2050	2980	0.177945	0.177945	0.177945	0.177945	0.177945	0.177945	0.089778	0.089778	0.089778	0.089778	0.177945	0.177945	0.089778	0.089778	0.089778	0.143016	0.089778	0.089778	0.089778	0.143016	0.089778	0.089778	0.177945	0.177945	0.089778	0.089778
2050	3000	0.17812	0.17812	0.17812	0.17812	0.17812	0.17812	0.0898413	0.0898413	0.0898413	0.0898413	0.17812	0.17812	0.0898413	0.0898413	0.0898413	0.143084	0.0898413	0.0898413	0.0898413	0.143084	0.0898413	0.0898413	0.17812	0.17812	0.0898413	0.0898413
2050	3020	0.178198	0.178198	0.178198	0.178198	0.178198	0.178198	0.0901616	0.0901616	0.0901616	0.0901616	0.178198	0.178198	0.0901616	0.0901616	0.0901616	0.143261	0.0901616	0.0901616	0.0901616	0.143261	0.0901616	0.0901616	0.178198	0.178198	0.0901616	0.0901616
2050	3040	0.180002	0.180002	0.180002	0.180002	0.180002	0.180002	0.0920695	0.0920695	0.0920695	0.0920695	0.180002	0.180002	0.0920695	0.0920695	0.0920695	0.145095	0.0920695	0.0920695	0.0920695	0.145095	0.0920695	0.0920695	0.180002	0.180002	0.0920695	0.0920695
2050	3060	0.181805	0.181805	0.181805	0.181805	0.181805	0.181805	0.0939773	0.0939773	0.0939773	0.0939773	0.181805	0.181805	0.0939773	0.0939773	0.0939773	0.14693	0.0939773	0.0939773	0.0939773	0.14693	0.0939773	0.0939773	0.181805	0.181805	0.0939773	0.0939773
2050	3080	0.183609	0.183609	0.183609	0.183609	0.183609	0.183609	0.0958852	0.0958852	0.0958852	0.0958852	0.183609	0.183609	0.0958852	0.0958852	0.0958852	0.148765	0.0958852	0.0958852	0.0958852	0.148765	0.0958852	0.0958852	0.183609	0.183609	0.0958852	0.0958852
2050	3100	0.185413	0.185413	0.185413	0.185413	0.185413	0.185413	0.0977931	0.0977931	0.0977931	0.0977931	0.185413	0.185413	0.0977931	0.0977931	0.0977931	0.1506	0.0977931	0.0977931	0.0977931	0.1506	0.0977931	0.0977931	0.185413	0.185413	0.0977931	0.0977931
2050	3120	0.187217	0.187217	0.187217	0.187217	0.187217	0.187217	0.0997009	0.0997009	0.0997009	0.0997009	0.187217	0.187217	0.0997009	0.0997009	0.0997009	0.152434	0.0997009	0.0997009	0.0997009	0.152434	0.0997009	0.0997009	0.187217	0.187217	0.0997009	0.0997009
2050	3140	0.189021	0.189021	0.189021	0.189021	0.189021	0.189021	0.101609	0.101609	0.101609	0.101609	0.189021	0.189021	0.101609	0.101609	0.101609	0.154269	0.101609	0.101609	0.101609	0.154269	0.101609	0.101609	0.189021	0.189021	0.101609	0.101609
2050	3160	0.190824	0.190824	0.190824	0.190824	0.190824	0.190824	0.103517	0.103517	0.103517	0.103517	0.190824	0.190824	0.103517	0.103517	0.103517	0.156104	0.103517	0.103517	0.103517	0.156104	0.103517	0.103517	0.190824	0.190824	0.103517	0.103517
2050	3180	0.192628	0.192628	0.192628	0.192628	0.192628	0.192628	0.105425	0.105425	0.105425	0.105425	0.192628	0.192628	0.105425	0.105425	0.105425	0.157939	0.105425	0.105425	0.105425	0.157939	0.105425	0.105425	0.192628	0.192628	0.105425	0.105425
2050	3200	0.194432	0.194432	0.194432	0.194432	0.194432	0.194432	0.107332	0.107332	0.107332	0.107332	0.194432	0.194432	0.107332	0.107332	0.107332	0.159773	0.107332	0.107332	0.107332	0.159773	0.107332	0.107332	0.194432	0.194432	0.107332	0.107332
2050	3220	0.196236	0.196236	0.196236	0.196236	0.196236	0.196236	0.10924	0.10924	0.10924	0.10924	0.196236	0.196236	0.10924	0.10924	0.10924	0.161608	0.10924	0.10924	0.10924	0.161608	0.10924	0.10924	0.196236	0.196236	0.10924	0.10924
2050	3240	0.19804	0.19804	0.19804	0.19804	0.19804	0.19804	0.111148	0.111148	0.111148	0.111148	0.19804	0.19804	0.111148	0.111148	0.111148	0.163443	0.111148	0.111148	0.111148	0.163443	0.111148	0.111148	0.19804	0.19804	0.111148	0.111148
2050	3260	0.199844	0.199844	0.199844	0.199844	0.199844	0.199844	0.113056	0.113056	0.113056	0.113056	0.199844	0.199844	0.113056	0.113056	0.113056	0.165277	0.113056	0.113056	0.113056	0.165277	0.113056	0.113056	0.199844	0.199844	0.113056	0.113056
2050	3280	0.201647	0.201647	0.201647	0.201647	0.201647	0.201647	0.114964	0.114964	0.114964	0.114964	0.201647	0.201647	0.114964	0.114964	0.114964	0.167112	0.114964	0.114964	0.114964	0.167112	0.114964	0.114964	0.201647	0.201647	0.114964	0.114964
2050	3300	0.203451	0.203451	0.203451	0.203451	0.203451	0.203451	0.116872	0.116872	0.116872	0.116872	0.203451	0.203451	0.116872	0.116872	0.116872	0.168947	0.116872	0.116872	0.116872	0.168947	0.116872	0.116872	0.203451	0.203451	0.116872	0.116872
2050	3320	0.205255	0.205255	0.205255	0.205255	0.205255	0.205255	0.11878	0.11878	0.11878	0.11878	0.205255	0.205255	0.11878	0.11878	0.11878	0.170782	0.11878	0.11878	0.11878	0.170782	0.11878	0.11878	0.205255	0.205255	0.11878	0.11878
2050	3340	0.207059	0.207059	0.207059	0.207059	0.207059	0.207059	0.120687	0.120687	0.120687	0.120687	0.207059	0.207059	0.120687	0.120687	0.120687	0.172616	0.120687	0.120687	0.120687	0.172616	0.120687	0.120687	0.207059	0.207059	0.120687	0.120687
2050	3360	0.208863	0.208863	0.208863	0.208863	0.208863	0.208863	0.122595	0.122595	0.122595	0.122595	0.208863	0.208863	0.122595	0.122595	0.122595	0.174451	0.122595	0.122595	0.122595	0.174451	0.122595	0.122595	0.208863	0.208863	0.122595	0.122595
2050	3380	0.210666	0.210666	0.210666	0.210666	0.210666	0.210666	0.124503	0.124503	0.124503	0.124503	0.210666	0.210666	0.124503	0.124503	0.124503	0.176286	0.124503	0.124503	0.124503	0.176286	0.124503	0.124503	0.210666	0.210666	0.124503	0.124503
2050	3400	0.21247	0.21247	0.21247	0.21247	0.21247	0.21247	0.126411	0.126411	0.126411	0.126411	0.21247	0.21247	0.126411	0.126411	0.126411	0.178121	0.126411	0.126411	0.126411	0.178121	0.126411	0.126411	0.21247	0.21247	0.126411	0.126411
2050	3420	0.214274	0.214274	0.214274	0.214274	0.214274	0.214274	0.128319	0.128319	0.128319	0.128319	0.214274	0.214274	0.128319	0.128319	0.128319	0.179955	0.128319	0.128319	0.128319	0.179955	0.128319	0.128319	0.214274	0.214274	0.128319	0.128319
2050	3440	0.216078	0.216078	0.216078	0.216078	0.216078	0.216078	0.130227	0.130227	0.130227	0.130227	0.216078	0.216078	0.130227	0.130227	0.130227	0.18179	0.130227	0.130227	0.130227	0.18179	0.130227	0.130227	0.216078	0.216078	0.130227	0.130227
2050	3460	0.217882	0.217882	0.217882	0.217882	0.217882	0.217882	0.132135	0.132135	0.132135	0.132135	0.217882	0.217882	0.132135	0.132135	0.132135	0.183625	0.132135	0.132135	0.132135	0.183625	0.132135	0.132135	0.217882	0.217882	0.132135	0.132135
2050	3480	0.219686	0.219686	0.219686	0.219686	0.219686	0.219686	0.134043	0.134043	0.134043	0.134043	0.219686	0.219686	0.134043	0.134043	0.134043	0.185459	0.134043	0.134043	0.134043	0.185459	0.134043	0.134043	0.219686	0.219686	0.134043	0.134043
2050	3500	0.221489	0.221489	0.221489	0.221489	0.221489	0.221489	0.13595	0.13595	0.13595	0.13595	0.221489	0.221489	0.13595	0.13595	0.13595	0.187294	0.13595	0.13595	0.13595	0.187294	0.13595	0.13595	0.221489	0.221489	0.13595	0.13595
2050	3520	0.223293	0.223293	0.223293	0.223293	0.223293	0.223293	0.137858	0.137858	0.137858	0.137858	0.223293	0.223293	0.137858	0.137858	0.137858	0.189129	0.137858	0.137858	0.137858	0.189129	0.137858	0.137858	0.223293	0.223293	0.137858	0.137858
2050	3540	0.225097	0.225097	0.225097	0.225097	0.225097	0.225097	0.139766	0.139766	0.139766	0.139766	0.225097	0.225097	0.139766	0.139766	0.139766	0.190964	0.139766	0.139766	0.139766	0.190964	0.139766	0.139766	0.225097	0.225097	0.139766	0.139766
2050	3560	0.226901	0.226901	0.226901	0.226901	0.226901	0.226901	0.141674	0.141674	0.141674	0.141674	0.226901	0.226901	0.141674	0.141674	0.141674	0.192798	0.141674	0.141674	0.141674	0.192798	0.141674	0.141674	0.226901	0.226901	0.141674	0.141674
2050	3580	0.228705	0.228705	0.228705	0.228705	0.228705	0.228705	0.143582	0.143582	0.143582	0.143582	0.228705	0.228705	0.143582	0.143582	0.143582	0.194633	0.143582	0.143582	0.143582	0.194633	0.143582	0.143582	0.228705	0.228705	0.143582	0.143582
2050	3600	0.230508	0.230508	0.230508	0.230508	0.230508	0.230508	0.14549	0.14549	0.14549	0.14549	0.230508	0.230508	0.14549	0.14549	0.14549	0.196468	0.14549	0.14549	0.14549	0.196468	0.14549	0.14549	0.230508	0.230508	0.14549	0.14549
2050	3620	0.232312	0.232312	0.232312	0.232312	0.232312	0.232312	0.147398	0.147398	0.147398	0.147398	0.232312	0.232312	0.147398	0.147398	0.147398	0.198303	0.147398	0.147398	0.147398	0.198303	0.147398	0.147398	0.232312	0.232312	0.147398	0.147398
2050	3640	0.234116	0.234116	0.234116	0.234116	0.234116	0.234116	0.149305	0.149305	0.149305	0.149305	0.234116	0.234116	0.149305	0.149305	0.149305	0.200137	0.149305	0.149305	0.149305	0.200137	0.149305	0.149305	0.234116	0.234116	0.149305	0.149305
2050	3660	0.23592	0.23592	0.23592	0.23592	0.23592	0.23592	0.151213	0.151213	0.151213	0.151213	0.23592	0.23592	0.151213	0.151213	0.151213	0.201972	0.151213	0.151213	0.151213	0.201972	0.151213	0.151213	0.23592	0.23592	0.151213	0.151213
2050	3680	0.237724	0.237724	0.237724	0.237724	0.237724	0.237724	0.153121	0.153121	0.153121	0.153121	0.237724	0.237724	0.153121	0.153121	0.153121	0.203807	0.153121	0.153121	0.153121	0.203807	0.153121	0.153121	0.237724	0.237724	0.153121	0.153121
2050	3700	0.239528	0.239528	0.239528	0.239528	0.239528	0.239528	0.155029	0.155029	0.155029	0.155029	0.239528	0.239528	0.155029	0.155029	0.155029	0.205641	0.155029	0.155029	0.155029	0.205641	0.155029	0.155029	0.239528	0.239528	0.155029	0.155029
2050	3720	0.241331	0.241331	0.241331	0.241331	0.241331	0.241331	0.156937	0.156937	0.156937	0.156937	0.241331	0.241331	0.156937	0.156937	0.156937	0.207476	0.156937	0.156937	0.156937	0.207476	0.156937	0.156937	0.241331	0.241331	0.156937	0.156937
2050	3740	0.243135	0.243135	0.243135	0.243135	0.243135	0.243135	0.158845	0.158845	0.158845	0.158845	0.243135	0.243135	0.158845	0.158845	0.158845	0.209311	0.158845	0.158845	0.158845	0.209311	0.158845	0.158845	0.243135	0.243135	0.158845	0.158845
2050	3760	0.244939	0.244939	0.244939	0.244939	0.244939	0.244939	0.160753	0.160753	0.160753	0.160753	0.244939	0.244939	0.160753	0.160753	0.160753	0.211146	0.160753	0.160753	0.160753	0.211146	0.160753	0.160753	0.244939	0.244939	0.160753	0.160753
2050	3780	0.246743	0.246743	0.246743	0.246743	0.246743	0.246743	0.162661	0.162661	0.162661	0.162661	0.246743	0.246743	0.162661	0.162661	0.162661	0.21298	0.162661	0.162661	0.162661	0.21298	0.162661	0.162661	0.246743	0.246743	0.162661	0.162661
2050	3800	0.248547	0.248547	0.248547	0.248547	0.248547	0.248547	0.164568	0.164568	0.164568	0.164568	0.248547	0.248547	0.164568	0.164568	0.164568	0.214815	0.164568	0.164568	0.164568	0.214815	0.164568	0.164568	0.248547	0.248547	0.164568	0.164568
2050	3820	0.25035	0.25035	0.25035	0.25035	0.25035	0.25035	0.166476	0.166476	0.166476	0.166476	0.25035	0.25035	0.166476	0.166476	0.166476	0.21665	0.166476	0.166476	0.166476	0.21665	0.166476	0.166476	0.25035	0.25035	0.166476	0.166476
2050	3840	0.252154	0.252154	0.252154	0.252154	0.252154	0.252154	0.168384	0.168384	0.168384	0.168384	0.252154	0.252154	0.168384	0.168384	0.168384	0.218485	0.168384	0.168384	0.168384	0.218485	0.168384	0.168384	0.252154	0.252154	0.168384	0.168384
2050	3860	0.253958	0.253958	0.253958	0.253958	0.253958	0.253958	0.170292	0.170292	0.170292	0.170292	0.253958	0.253958	0.170292	0.170292	0.170292	0.220319	0.170292	0.170292	0.170292	0.220319	0.170292	0.170292	0.253958	0.253958	0.170292	0.170292
2050	3880	0.255762	0.255762	0.255762	0.255762	0.255762	0.255762	0.1722	0.1722	0.1722	0.1722	0.255762	0.255762	0.1722	0.1722	0.1722	0.222154	0.1722	0.1722	0.1722	0.222154	0.1722	0.1722	0.255762	0.255762	0.1722	0.1722
2050	3900	0.257566	0.257566	0.257566	0.257566	0.257566	0.257566	0.174108	0.174108	0.174108	0.174108	0.257566	0.257566	0.174108	0.174108	0.174108	0.223989	0.174108	0.174108	0.174108	0.223989	0.174108	0.174108	0.257566	0.257566	0.174108	0.174108
2050	3920	0.259369	0.259369	0.259369	0.259369	0.259369	0.259369	0.176016	0.176016	0.176016	0.176016	0.259369	0.259369	0.176016	0.176016	0.176016	0.225824	0.176016	0.176016	0.176016	0.225824	0.176016	0.176016	0.259369	0.259369	0.176016	0.176016
2050	3940	0.261173	0.261173	0.261173	0.261173	0.261173	0.261173	0.177923	0.177923	0.177923	0.177923	0.261173	0.261173	0.177923	0.177923	0.177923	0.227658	0.177923	0.177923	0.177923	0.227658	0.177923	0.177923	0.261173	0.261173	0.177923	0.177923
2050	3960	0.262977	0.262977	0.262977	0.262977	0.262977	0.262977	0.179831	0.179831	0.179831	0.179831	0.262977	0.262977	0.179831	0.179831	0.179831	0.229493	0.179831	0.179831	0.179831	0.229493	0.179831	0.179831	0.262977	0.262977	0.179831	0.179831
2050	3980	0.264781	0.264781	0.264781	0.264781	0.264781	0.264781	0.181739	0.181739	0.181739	0.181739	0.264781	0.264781	0.181739	0.181739	0.181739	0.231328	0.181739	0.181739	0.181739	0.231328	0.181739	0.181739	0.264781	0.264781	0.181739	0.181739
2050	4000	0.266585	0.266585	0.266585	0.266585	0.266585	0.266585	0.183647	0.183647	0.183647	0.183647	0.266585	0.266585	0.183647	0.183647	0.183647	0.233162	0.183647	0.183647	0.183647	0.233162	0.183647	0.183647	0.266585	0.266585	0.183647	0.183647
2100	0	0	0	0	0	0	0	0	0	0	0	0	0	0	0	0	0	0	0	0	0	0	0	0	0	0	0
2100	20	0.0872932	0.0872932	0.0872932	0.0872932	0.0872932	0.0872932	0.0411228	0.0411228	0.0411228	0.0411228	0.0872932	0.0872932	0.0411228	0.0411228	0.0411228	0.0710827	0.0411228	0.0411228	0.0411228	0.0710827	0.0411228	0.0411228	0.0872932	0.0872932	0.0411228	0.0411228
2100	40	0.0928493	0.0928493	0.0928493	0.0928493	0.0928493	0.0928493	0.0430947	0.0430947	0.0430947	0.0430947	0.0928493	0.0928493	0.0430947	0.0430947	0.0430947	0.0748149	0.0430947	0.0430947	0.0430947	0.0748149	0.0430947	0.0430947	0.0928493	0.0928493	0.0430947	0.0430947
2100	60	0.0987107	0.0987107	0.0987107	0.0987107	0.0987107	0.0987107	0.0459786	0.0459786	0.0459786	0.0459786	0.0987107	0.0987107	0.0459786	0.0459786	0.0459786	0.0786057	0.0459786	0.0459786	0.0459786	0.0786057	0.0459786	0.0459786	0.0987107	0.0987107	0.0459786	0.0459786
2100	80	0.103907	0.103907	0.103907	0.103907	0.103907	0.103907	0.0490344	0.0490344	0.0490344	0.0490344	0.103907	0.103907	0.0490344	0.0490344	0.0490344	0.0836348	0.0490344	0.0490344	0.0490344	0.0836348	0.0490344	0.0490344	0.103907	0.103907	0.0490344	0.0490344
2100	100	0.110084	0.110084	0.110084	0.110084	0.110084	0.110084	0.0522405	0.0522405	0.0522405	0.0522405	0.110084	0.110084	0.0522405	0.0522405	0.0522405	0.0876189	0.0522405	0.0522405	0.0522405	0.0876189	0.0522405	0.0522405	0.110084	0.110084	0.0522405	0.0522405
2100	120	0.115795	0.115795	0.115795	0.115795	0.115795	0.115795	0.0550124	0.0550124	0.0550124	0.0550124	0.115795	0.115795	0.0550124	0.0550124	0.0550124	0.0931073	0.0550124	0.0550124	0.0550124	0.0931073	0.0550124	0.0550124	0.115795	0.115795	0.0550124	0.0550124
2100	140	0.120621	0.120621	0.120621	0.120621	0.120621	0.120621	0.0580028	0.0580028	0.0580028	0.0580028	0.120621	0.120621	0.0580028	0.0580028	0.0580028	0.0973896	0.0580028	0.0580028	0.0580028	0.0973896	0.0580028	0.0580028	0.120621	0.120621	0.0580028	0.0580028
2100	160	0.12542	0.12542	0.12542	0.12542	0.12542	0.12542	0.0615643	0.0615643	0.0615643	0.0615643	0.12542	0.12542	0.0615643	0.0615643	0.0615643	0.102254	0.0615643	0.0615643	0.0615643	0.102254	0.0615643	0.0615643	0.12542	0.12542	0.0615643	0.0615643
2100	180	0.130378	0.130378	0.130378	0.130378	0.130378	0.130378	0.0651327	0.0651327	0.0651327	0.0651327	0.130378	0.130378	0.0651327	0.0651327	0.0651327	0.107242	0.0651327	0.0651327	0.0651327	0.107242	0.0651327	0.0651327	0.130378	0.130378	0.0651327	0.0651327
2100	200	0.135573	0.135573	0.135573	0.135573	0.135573	0.135573	0.0678308	0.0678308	0.0678308	0.0678308	0.135573	0.135573	0.0678308	0.0678308	0.0678308	0.112071	0.0678308	0.0678308	0.0678308	0.112071	0.0678308	0.0678308	0.135573	0.135573	0.0678308	0.0678308
2100	220	0.139588	0.139588	0.139588	0.139588	0.139588	0.139588	0.0695484	0.0695484	0.0695484	0.0695484	0.139588	0.139588	0.0695484	0.0695484	0.0695484	0.115524	0.0695484	0.0695484	0.0695484	0.115524	0.0695484	0.0695484	0.139588	0.139588	0.0695484	0.0695484
2100	240	0.140849	0.140849	0.140849	0.140849	0.140849	0.140849	0.0698338	0.0698338	0.0698338	0.0698338	0.140849	0.140849	0.0698338	0.0698338	0.0698338	0.116609	0.0698338	0.0698338	0.0698338	0.116609	0.0698338	0.0698338	0.140849	0.140849	0.0698338	0.0698338
2100	260	0.141075	0.141075	0.141075	0.141075	0.141075	0.141075	0.070008	0.070008	0.070008	0.070008	0.141075	0.141075	0.070008	0.070008	0.070008	0.116957	0.070008	0.070008	0.070008	0.116957	0.070008	0.070008	0.141075	0.141075	0.070008	0.070008
2100	280	0.141308	0.141308	0.141308	0.141308	0.141308	0.141308	0.0703233	0.0703233	0.0703233	0.0703233	0.141308	0.141308	0.0703233	0.0703233	0.0703233	0.117204	0.0703233	0.0703233	0.0703233	0.117204	0.0703233	0.0703233	0.141308	0.141308	0.0703233	0.0703233
2100	300	0.141642	0.141642	0.141642	0.141642	0.141642	0.141642	0.0706076	0.0706076	0.0706076	0.0706076	0.141642	0.141642	0.0706076	0.0706076	0.0706076	0.11748	0.0706076	0.0706076	0.0706076	0.11748	0.0706076	0.0706076	0.141642	0.141642	0.0706076	0.0706076
2100	320	0.142347	0.142347	0.142347	0.142347	0.142347	0.142347	0.070671	0.070671	0.070671	0.070671	0.142347	0.142347	0.070671	0.070671	0.070671	0.117763	0.070671	0.070671	0.070671	0.117763	0.070671	0.070671	0.142347	0.142347	0.070671	0.070671
2100	340	0.142632	0.142632	0.142632	0.142632	0.142632	0.142632	0.0708097	0.0708097	0.0708097	0.0708097	0.142632	0.142632	0.0708097	0.0708097	0.0708097	0.11791	0.0708097	0.0708097	0.0708097	0.11791	0.0708097	0.0708097	0.142632	0.142632	0.0708097	0.0708097
2100	360	0.142936	0.142936	0.142936	0.142936	0.142936	0.142936	0.0710446	0.0710446	0.0710446	0.0710446	0.142936	0.142936	0.0710446	0.0710446	0.0710446	0.118377	0.0710446	0.0710446	0.0710446	0.118377	0.0710446	0.0710446	0.142936	0.142936	0.0710446	0.0710446
2100	380	0.143059	0.143059	0.143059	0.143059	0.143059	0.143059	0.0712124	0.0712124	0.0712124	0.0712124	0.143059	0.143059	0.0712124	0.0712124	0.0712124	0.118549	0.0712124	0.0712124	0.0712124	0.118549	0.0712124	0.0712124	0.143059	0.143059	0.0712124	0.0712124
2100	400	0.143429	0.143429	0.143429	0.143429	0.143429	0.143429	0.0713332	0.0713332	0.0713332	0.0713332	0.143429	0.143429	0.0713332	0.0713332	0.0713332	0.118827	0.0713332	0.0713332	0.0713332	0.118827	0.0713332	0.0713332	0.143429	0.143429	0.0713332	0.0713332
2100	420	0.143674	0.143674	0.143674	0.143674	0.143674	0.143674	0.0715017	0.0715017	0.0715017	0.0715017	0.143674	0.143674	0.0715017	0.0715017	0.0715017	0.119154	0.0715017	0.0715017	0.0715017	0.119154	0.0715017	0.0715017	0.143674	0.143674	0.0715017	0.0715017
2100	440	0.144043	0.144043	0.144043	0.144043	0.144043	0.144043	0.071739	0.071739	0.071739	0.071739	0.144043	0.144043	0.071739	0.071739	0.071739	0.119481	0.071739	0.071739	0.071739	0.119481	0.071739	0.071739	0.144043	0.144043	0.071739	0.071739
2100	460	0.144364	0.144364	0.144364	0.144364	0.144364	0.144364	0.0719163	0.0719163	0.0719163	0.0719163	0.144364	0.144364	0.0719163	0.0719163	0.0719163	0.119873	0.0719163	0.0719163	0.0719163	0.119873	0.0719163	0.0719163	0.144364	0.144364	0.0719163	0.0719163
2100	480	0.144748	0.144748	0.144748	0.144748	0.144748	0.144748	0.0721556	0.0721556	0.0721556	0.0721556	0.144748	0.144748	0.0721556	0.0721556	0.0721556	0.120112	0.0721556	0.0721556	0.0721556	0.120112	0.0721556	0.0721556	0.144748	0.144748	0.0721556	0.0721556
2100	500	0.14492	0.14492	0.14492	0.14492	0.14492	0.14492	0.0724341	0.0724341	0.0724341	0.0724341	0.14492	0.14492	0.0724341	0.0724341	0.0724341	0.120281	0.0724341	0.0724341	0.0724341	0.120281	0.0724341	0.0724341	0.14492	0.14492	0.0724341	0.0724341
2100	520	0.145214	0.145214	0.145214	0.145214	0.145214	0.145214	0.0726441	0.0726441	0.0726441	0.0726441	0.145214	0.145214	0.0726441	0.0726441	0.0726441	0.120706	0.0726441	0.0726441	0.0726441	0.120706	0.0726441	0.0726441	0.145214	0.145214	0.0726441	0.0726441
2100	540	0.145717	0.145717	0.145717	0.145717	0.145717	0.145717	0.0727923	0.0727923	0.0727923	0.0727923	0.145717	0.145717	0.0727923	0.0727923	0.0727923	0.120966	0.0727923	0.0727923	0.0727923	0.120966	0.0727923	0.0727923	0.145717	0.145717	0.0727923	0.0727923
2100	560	0.146194	0.146194	0.146194	0.146194	0.146194	0.146194	0.0729653	0.0729653	0.0729653	0.0729653	0.146194	0.146194	0.0729653	0.0729653	0.0729653	0.121298	0.0729653	0.0729653	0.0729653	0.121298	0.0729653	0.0729653	0.146194	0.146194	0.0729653	0.0729653
2100	580	0.146444	0.146444	0.146444	0.146444	0.146444	0.146444	0.0732563	0.0732563	0.0732563	0.0732563	0.146444	0.146444	0.0732563	0.0732563	0.0732563	0.121711	0.0732563	0.0732563	0.0732563	0.121711	0.0732563	0.0732563	0.146444	0.146444	0.0732563	0.0732563
2100	600	0.147058	0.147058	0.147058	0.147058	0.147058	0.147058	0.0735777	0.0735777	0.0735777	0.0735777	0.147058	0.147058	0.0735777	0.0735777	0.0735777	0.121878	0.0735777	0.0735777	0.0735777	0.121878	0.0735777	0.0735777	0.147058	0.147058	0.0735777	0.0735777
2100	620	0.1474	0.1474	0.1474	0.1474	0.1474	0.1474	0.0737326	0.0737326	0.0737326	0.0737326	0.1474	0.1474	0.0737326	0.0737326	0.0737326	0.122204	0.0737326	0.0737326	0.0737326	0.122204	0.0737326	0.0737326	0.1474	0.1474	0.0737326	0.0737326
2100	640	0.147627	0.147627	0.147627	0.147627	0.147627	0.147627	0.073899	0.073899	0.073899	0.073899	0.147627	0.147627	0.073899	0.073899	0.073899	0.12248	0.073899	0.073899	0.073899	0.12248	0.073899	0.073899	0.147627	0.147627	0.073899	0.073899
2100	660	0.147897	0.147897	0.147897	0.147897	0.147897	0.147897	0.0741286	0.0741286	0.0741286	0.0741286	0.147897	0.147897	0.0741286	0.0741286	0.0741286	0.122837	0.0741286	0.0741286	0.0741286	0.122837	0.0741286	0.0741286	0.147897	0.147897	0.0741286	0.0741286
2100	680	0.148484	0.148484	0.148484	0.148484	0.148484	0.148484	0.0743676	0.0743676	0.0743676	0.0743676	0.148484	0.148484	0.0743676	0.0743676	0.0743676	0.12307	0.0743676	0.0743676	0.0743676	0.12307	0.0743676	0.0743676	0.148484	0.148484	0.0743676	0.0743676
2100	700	0.148731	0.148731	0.148731	0.148731	0.148731	0.148731	0.0745813	0.0745813	0.0745813	0.0745813	0.148731	0.148731	0.0745813	0.0745813	0.0745813	0.12346	0.0745813	0.0745813	0.0745813	0.12346	0.0745813	0.0745813	0.148731	0.148731	0.0745813	0.0745813
2100	720	0.149168	0.149168	0.149168	0.149168	0.149168	0.149168	0.0748708	0.0748708	0.0748708	0.0748708	0.149168	0.149168	0.0748708	0.0748708	0.0748708	0.123722	0.0748708	0.0748708	0.0748708	0.123722	0.0748708	0.0748708	0.149168	0.149168	0.0748708	0.0748708
2100	740	0.149625	0.149625	0.149625	0.149625	0.149625	0.149625	0.075122	0.075122	0.075122	0.075122	0.149625	0.149625	0.075122	0.075122	0.075122	0.12399	0.075122	0.075122	0.075122	0.12399	0.075122	0.075122	0.149625	0.149625	0.075122	0.075122
2100	760	0.149878	0.149878	0.149878	0.149878	0.149878	0.149878	0.0752481	0.0752481	0.0752481	0.0752481	0.149878	0.149878	0.0752481	0.0752481	0.0752481	0.124371	0.0752481	0.0752481	0.0752481	0.124371	0.0752481	0.0752481	0.149878	0.149878	0.0752481	0.0752481
2100	780	0.150307	0.150307	0.150307	0.150307	0.150307	0.150307	0.0754504	0.0754504	0.0754504	0.0754504	0.150307	0.150307	0.0754504	0.0754504	0.0754504	0.124649	0.0754504	0.0754504	0.0754504	0.124649	0.0754504	0.0754504	0.150307	0.150307	0.0754504	0.0754504
2100	800	0.150912	0.150912	0.150912	0.150912	0.150912	0.150912	0.0757853	0.0757853	0.0757853	0.0757853	0.150912	0.150912	0.0757853	0.0757853	0.0757853	0.125112	0.0757853	0.0757853	0.0757853	0.125112	0.0757853	0.0757853	0.150912	0.150912	0.0757853	0.0757853
2100	820	0.151357	0.151357	0.151357	0.151357	0.151357	0.151357	0.075958	0.075958	0.075958	0.075958	0.151357	0.151357	0.075958	0.075958	0.075958	0.125358	0.075958	0.075958	0.075958	0.125358	0.075958	0.075958	0.151357	0.151357	0.075958	0.075958
2100	840	0.151898	0.151898	0.151898	0.151898	0.151898	0.151898	0.0762925	0.0762925	0.0762925	0.0762925	0.151898	0.151898	0.0762925	0.0762925	0.0762925	0.125777	0.0762925	0.0762925	0.0762925	0.125777	0.0762925	0.0762925	0.151898	0.151898	0.0762925	0.0762925
2100	860	0.152284	0.152284	0.152284	0.152284	0.152284	0.152284	0.0765145	0.0765145	0.0765145	0.0765145	0.152284	0.152284	0.0765145	0.0765145	0.0765145	0.12612	0.0765145	0.0765145	0.0765145	0.12612	0.0765145	0.0765145	0.152284	0.152284	0.0765145	0.0765145
2100	880	0.153032	0.153032	0.153032	0.153032	0.153032	0.153032	0.0766821	0.0766821	0.0766821	0.0766821	0.153032	0.153032	0.0766821	0.0766821	0.0766821	0.126392	0.0766821	0.0766821	0.0766821	0.126392	0.0766821	0.0766821	0.153032	0.153032	0.0766821	0.0766821
2100	900	0.153394	0.153394	0.153394	0.153394	0.153394	0.153394	0.0768916	0.0768916	0.0768916	0.0768916	0.153394	0.153394	0.0768916	0.0768916	0.0768916	0.126894	0.0768916	0.0768916	0.0768916	0.126894	0.0768916	0.0768916	0.153394	0.153394	0.0768916	0.0768916
2100	920	0.153834	0.153834	0.153834	0.153834	0.153834	0.153834	0.0769506	0.0769506	0.0769506	0.0769506	0.153834	0.153834	0.0769506	0.0769506	0.0769506	0.12725	0.0769506	0.0769506	0.0769506	0.12725	0.0769506	0.0769506	0.153834	0.153834	0.0769506	0.0769506
2100	940	0.154181	0.154181	0.154181	0.154181	0.154181	0.154181	0.07711	0.07711	0.07711	0.07711	0.154181	0.154181	0.07711	0.07711	0.07711	0.127554	0.07711	0.07711	0.07711	0.127554	0.07711	0.07711	0.154181	0.154181	0.07711	0.07711
2100	960	0.154531	0.154531	0.154531	0.154531	0.154531	0.154531	0.0773349	0.0773349	0.0773349	0.0773349	0.154531	0.154531	0.0773349	0.0773349	0.0773349	0.127916	0.0773349	0.0773349	0.0773349	0.127916	0.0773349	0.0773349	0.154531	0.154531	0.0773349	0.0773349
2100	980	0.155123	0.155123	0.155123	0.155123	0.155123	0.155123	0.0777058	0.0777058	0.0777058	0.0777058	0.155123	0.155123	0.0777058	0.0777058	0.0777058	0.128231	0.0777058	0.0777058	0.0777058	0.128231	0.0777058	0.0777058	0.155123	0.155123	0.0777058	0.0777058
2100	1000	0.155342	0.155342	0.155342	0.155342	0.155342	0.155342	0.0780431	0.0780431	0.0780431	0.0780431	0.155342	0.155342	0.0780431	0.0780431	0.0780431	0.128587	0.0780431	0.0780431	0.0780431	0.128587	0.0780431	0.0780431	0.155342	0.155342	0.0780431	0.0780431
2100	1020	0.15565	0.15565	0.15565	0.15565	0.15565	0.15565	0.0784062	0.0784062	0.0784062	0.0784062	0.15565	0.15565	0.0784062	0.0784062	0.0784062	0.128872	0.0784062	0.0784062	0.0784062	0.128872	0.0784062	0.0784062	0.15565	0.15565	0.0784062	0.0784062
2100	1040	0.15596	0.15596	0.15596	0.15596	0.15596	0.15596	0.0786255	0.0786255	0.0786255	0.0786255	0.15596	0.15596	0.0786255	0.0786255	0.0786255	0.129384	0.0786255	0.0786255	0.0786255	0.129384	0.0786255	0.0786255	0.15596	0.15596	0.0786255	0.0786255
2100	1060	0.156291	0.156291	0.156291	0.156291	0.156291	0.156291	0.0790094	0.0790094	0.0790094	0.0790094	0.156291	0.156291	0.0790094	0.0790094	0.0790094	0.129804	0.0790094	0.0790094	0.0790094	0.129804	0.0790094	0.0790094	0.156291	0.156291	0.0790094	0.0790094
2100	1080	0.15672	0.15672	0.15672	0.15672	0.15672	0.15672	0.0791505	0.0791505	0.0791505	0.0791505	0.15672	0.15672	0.0791505	0.0791505	0.0791505	0.130324	0.0791505	0.0791505	0.0791505	0.130324	0.0791505	0.0791505	0.15672	0.15672	0.0791505	0.0791505
2100	1100	0.157249	0.157249	0.157249	0.157249	0.157249	0.157249	0.0793861	0.0793861	0.0793861	0.0793861	0.157249	0.157249	0.0793861	0.0793861	0.0793861	0.130535	0.0793861	0.0793861	0.0793861	0.130535	0.0793861	0.0793861	0.157249	0.157249	0.0793861	0.0793861
2100	1120	0.157648	0.157648	0.157648	0.157648	0.157648	0.157648	0.0797987	0.0797987	0.0797987	0.0797987	0.157648	0.157648	0.0797987	0.0797987	0.0797987	0.130935	0.0797987	0.0797987	0.0797987	0.130935	0.0797987	0.0797987	0.157648	0.157648	0.0797987	0.0797987
2100	1140	0.158043	0.158043	0.158043	0.158043	0.158043	0.158043	0.079955	0.079955	0.079955	0.079955	0.158043	0.158043	0.079955	0.079955	0.079955	0.131222	0.079955	0.079955	0.079955	0.131222	0.079955	0.079955	0.158043	0.158043	0.079955	0.079955
2100	1160	0.158713	0.158713	0.158713	0.158713	0.158713	0.158713	0.0802069	0.0802069	0.0802069	0.0802069	0.158713	0.158713	0.0802069	0.0802069	0.0802069	0.131888	0.0802069	0.0802069	0.0802069	0.131888	0.0802069	0.0802069	0.158713	0.158713	0.0802069	0.0802069
2100	1180	0.159255	0.159255	0.159255	0.159255	0.159255	0.159255	0.0803367	0.0803367	0.0803367	0.0803367	0.159255	0.159255	0.0803367	0.0803367	0.0803367	0.132271	0.0803367	0.0803367	0.0803367	0.132271	0.0803367	0.0803367	0.159255	0.159255	0.0803367	0.0803367
2100	1200	0.159567	0.159567	0.159567	0.159567	0.159567	0.159567	0.0807024	0.0807024	0.0807024	0.0807024	0.159567	0.159567	0.0807024	0.0807024	0.0807024	0.132906	0.0807024	0.0807024	0.0807024	0.132906	0.0807024	0.0807024	0.159567	0.159567	0.0807024	0.0807024
2100	1220	0.16001	0.16001	0.16001	0.16001	0.16001	0.16001	0.0810295	0.0810295	0.0810295	0.0810295	0.16001	0.16001	0.0810295	0.0810295	0.0810295	0.133422	0.0810295	0.0810295	0.0810295	0.133422	0.0810295	0.0810295	0.16001	0.16001	0.0810295	0.0810295
2100	1240	0.160285	0.160285	0.160285	0.160285	0.160285	0.160285	0.0814099	0.0814099	0.0814099	0.0814099	0.160285	0.160285	0.0814099	0.0814099	0.0814099	0.133999	0.0814099	0.0814099	0.0814099	0.133999	0.0814099	0.0814099	0.160285	0.160285	0.0814099	0.0814099
2100	1260	0.160777	0.160777	0.160777	0.160777	0.160777	0.160777	0.0817907	0.0817907	0.0817907	0.0817907	0.160777	0.160777	0.0817907	0.0817907	0.0817907	0.134565	0.0817907	0.0817907	0.0817907	0.134565	0.0817907	0.0817907	0.160777	0.160777	0.0817907	0.0817907
2100	1280	0.161243	0.161243	0.161243	0.161243	0.161243	0.161243	0.0820139	0.0820139	0.0820139	0.0820139	0.161243	0.161243	0.0820139	0.0820139	0.0820139	0.134941	0.0820139	0.0820139	0.0820139	0.134941	0.0820139	0.0820139	0.161243	0.161243	0.0820139	0.0820139
2100	1300	0.161612	0.161612	0.161612	0.161612	0.161612	0.161612	0.0822902	0.0822902	0.0822902	0.0822902	0.161612	0.161612	0.0822902	0.0822902	0.0822902	0.135241	0.0822902	0.0822902	0.0822902	0.135241	0.0822902	0.0822902	0.161612	0.161612	0.0822902	0.0822902
2100	1320	0.1621	0.1621	0.1621	0.1621	0.1621	0.1621	0.0825087	0.0825087	0.0825087	0.0825087	0.1621	0.1621	0.0825087	0.0825087	0.0825087	0.13576	0.0825087	0.0825087	0.0825087	0.13576	0.0825087	0.0825087	0.1621	0.1621	0.0825087	0.0825087
2100	1340	0.162522	0.162522	0.162522	0.162522	0.162522	0.162522	0.0826702	0.0826702	0.0826702	0.0826702	0.162522	0.162522	0.0826702	0.0826702	0.0826702	0.136398	0.0826702	0.0826702	0.0826702	0.136398	0.0826702	0.0826702	0.162522	0.162522	0.0826702	0.0826702
2100	1360	0.163093	0.163093	0.163093	0.163093	0.163093	0.163093	0.0830026	0.0830026	0.0830026	0.0830026	0.163093	0.163093	0.0830026	0.0830026	0.0830026	0.136971	0.0830026	0.0830026	0.0830026	0.136971	0.0830026	0.0830026	0.163093	0.163093	0.0830026	0.0830026
2100	1380	0.163807	0.163807	0.163807	0.163807	0.163807	0.163807	0.0832882	0.0832882	0.0832882	0.0832882	0.163807	0.163807	0.0832882	0.0832882	0.0832882	0.137369	0.0832882	0.0832882	0.0832882	0.137369	0.0832882	0.0832882	0.163807	0.163807	0.0832882	0.0832882
2100	1400	0.164576	0.164576	0.164576	0.164576	0.164576	0.164576	0.0835522	0.0835522	0.0835522	0.0835522	0.164576	0.164576	0.0835522	0.0835522	0.0835522	0.137872	0.0835522	0.0835522	0.0835522	0.137872	0.0835522	0.0835522	0.164576	0.164576	0.0835522	0.0835522
2100	1420	0.165005	0.165005	0.165005	0.165005	0.165005	0.165005	0.083754	0.083754	0.083754	0.083754	0.165005	0.165005	0.083754	0.083754	0.083754	0.1383	0.083754	0.083754	0.083754	0.1383	0.083754	0.083754	0.165005	0.165005	0.083754	0.083754
2100	1440	0.165698	0.165698	0.165698	0.165698	0.165698	0.165698	0.0841785	0.0841785	0.0841785	0.0841785	0.165698	0.165698	0.0841785	0.0841785	0.0841785	0.138661	0.0841785	0.0841785	0.0841785	0.138661	0.0841785	0.0841785	0.165698	0.165698	0.0841785	0.0841785
2100	1460	0.166353	0.166353	0.166353	0.166353	0.166353	0.166353	0.0844826	0.0844826	0.0844826	0.0844826	0.166353	0.166353	0.0844826	0.0844826	0.0844826	0.139001	0.0844826	0.0844826	0.0844826	0.139001	0.0844826	0.0844826	0.166353	0.166353	0.0844826	0.0844826
2100	1480	0.166766	0.166766	0.166766	0.166766	0.166766	0.166766	0.0846694	0.0846694	0.0846694	0.0846694	0.166766	0.166766	0.0846694	0.0846694	0.0846694	0.139487	0.0846694	0.0846694	0.0846694	0.139487	0.0846694	0.0846694	0.166766	0.166766	0.0846694	0.0846694
2100	1500	0.167656	0.167656	0.167656	0.167656	0.167656	0.167656	0.0848652	0.0848652	0.0848652	0.0848652	0.167656	0.167656	0.0848652	0.0848652	0.0848652	0.139849	0.0848652	0.0848652	0.0848652	0.139849	0.0848652	0.0848652	0.167656	0.167656	0.0848652	0.0848652
2100	1520	0.168156	0.168156	0.168156	0.168156	0.168156	0.168156	0.0851779	0.0851779	0.0851779	0.0851779	0.168156	0.168156	0.0851779	0.0851779	0.0851779	0.140078	0.0851779	0.0851779	0.0851779	0.140078	0.0851779	0.0851779	0.168156	0.168156	0.0851779	0.0851779
2100	1540	0.168868	0.168868	0.168868	0.168868	0.168868	0.168868	0.08546	0.08546	0.08546	0.08546	0.168868	0.168868	0.08546	0.08546	0.08546	0.140414	0.08546	0.08546	0.08546	0.140414	0.08546	0.08546	0.168868	0.168868	0.08546	0.08546
2100	1560	0.169133	0.169133	0.169133	0.169133	0.169133	0.169133	0.0856784	0.0856784	0.0856784	0.0856784	0.169133	0.169133	0.0856784	0.0856784	0.0856784	0.14095	0.0856784	0.0856784	0.0856784	0.14095	0.0856784	0.0856784	0.169133	0.169133	0.0856784	0.0856784
2100	1580	0.169814	0.169814	0.169814	0.169814	0.169814	0.169814	0.086061	0.086061	0.086061	0.086061	0.169814	0.169814	0.086061	0.086061	0.086061	0.141401	0.086061	0.086061	0.086061	0.141401	0.086061	0.086061	0.169814	0.169814	0.086061	0.086061
2100	1600	0.170209	0.170209	0.170209	0.170209	0.170209	0.170209	0.0863509	0.0863509	0.0863509	0.0863509	0.170209	0.170209	0.0863509	0.0863509	0.0863509	0.141757	0.0863509	0.0863509	0.0863509	0.141757	0.0863509	0.0863509	0.170209	0.170209	0.0863509	0.0863509
2100	1620	0.170924	0.170924	0.170924	0.170924	0.170924	0.170924	0.086531	0.086531	0.086531	0.086531	0.170924	0.170924	0.086531	0.086531	0.086531	0.142284	0.086531	0.086531	0.086531	0.142284	0.086531	0.086531	0.170924	0.170924	0.086531	0.086531
2100	1640	0.171592	0.171592	0.171592	0.171592	0.171592	0.171592	0.0869817	0.0869817	0.0869817	0.0869817	0.171592	0.171592	0.0869817	0.0869817	0.0869817	0.142626	0.0869817	0.0869817	0.0869817	0.142626	0.0869817	0.0869817	0.171592	0.171592	0.0869817	0.0869817
2100	1660	0.172081	0.172081	0.172081	0.172081	0.172081	0.172081	0.0873612	0.0873612	0.0873612	0.0873612	0.172081	0.172081	0.0873612	0.0873612	0.0873612	0.142921	0.0873612	0.0873612	0.0873612	0.142921	0.0873612	0.0873612	0.172081	0.172081	0.0873612	0.0873612
2100	1680	0.17269	0.17269	0.17269	0.17269	0.17269	0.17269	0.0875922	0.0875922	0.0875922	0.0875922	0.17269	0.17269	0.0875922	0.0875922	0.0875922	0.143404	0.0875922	0.0875922	0.0875922	0.143404	0.0875922	0.0875922	0.17269	0.17269	0.0875922	0.0875922
2100	1700	0.173319	0.173319	0.173319	0.173319	0.173319	0.173319	0.0877905	0.0877905	0.0877905	0.0877905	0.173319	0.173319	0.0877905	0.0877905	0.0877905	0.143639	0.0877905	0.0877905	0.0877905	0.143639	0.0877905	0.0877905	0.173319	0.173319	0.0877905	0.0877905
2100	1720	0.173721	0.173721	0.173721	0.173721	0.173721	0.173721	0.0881273	0.0881273	0.0881273	0.0881273	0.173721	0.173721	0.0881273	0.0881273	0.0881273	0.14393	0.0881273	0.0881273	0.0881273	0.14393	0.0881273	0.0881273	0.173721	0.173721	0.0881273	0.0881273
2100	1740	0.174103	0.174103	0.174103	0.174103	0.174103	0.174103	0.0883188	0.0883188	0.0883188	0.0883188	0.174103	0.174103	0.0883188	0.0883188	0.0883188	0.144189	0.0883188	0.0883188	0.0883188	0.144189	0.0883188	0.0883188	0.174103	0.174103	0.0883188	0.0883188
2100	1760	0.174506	0.174506	0.174506	0.174506	0.174506	0.174506	0.0884117	0.0884117	0.0884117	0.0884117	0.174506	0.174506	0.0884117	0.0884117	0.0884117	0.144852	0.0884117	0.0884117	0.0884117	0.144852	0.0884117	0.0884117	0.174506	0.174506	0.0884117	0.0884117
2100	1780	0.175271	0.175271	0.175271	0.175271	0.175271	0.175271	0.0887329	0.0887329	0.0887329	0.0887329	0.175271	0.175271	0.0887329	0.0887329	0.0887329	0.145216	0.0887329	0.0887329	0.0887329	0.145216	0.0887329	0.0887329	0.175271	0.175271	0.0887329	0.0887329
2100	1800	0.175565	0.175565	0.175565	0.175565	0.175565	0.175565	0.0888487	0.0888487	0.0888487	0.0888487	0.175565	0.175565	0.0888487	0.0888487	0.0888487	0.14546	0.0888487	0.0888487	0.0888487	0.14546	0.0888487	0.0888487	0.175565	0.175565	0.0888487	0.0888487
2100	1820	0.175948	0.175948	0.175948	0.175948	0.175948	0.175948	0.088987	0.088987	0.088987	0.088987	0.175948	0.175948	0.088987	0.088987	0.088987	0.145759	0.088987	0.088987	0.088987	0.145759	0.088987	0.088987	0.175948	0.175948	0.088987	0.088987
2100	1840	0.176615	0.176615	0.176615	0.176615	0.176615	0.176615	0.0891895	0.0891895	0.0891895	0.0891895	0.176615	0.176615	0.0891895	0.0891895	0.0891895	0.146096	0.0891895	0.0891895	0.0891895	0.146096	0.0891895	0.0891895	0.176615	0.176615	0.0891895	0.0891895
2100	1860	0.176975	0.176975	0.176975	0.176975	0.176975	0.176975	0.0892937	0.0892937	0.0892937	0.0892937	0.176975	0.176975	0.0892937	0.0892937	0.0892937	0.146604	0.0892937	0.0892937	0.0892937	0.146604	0.0892937	0.0892937	0.176975	0.176975	0.0892937	0.0892937
2100	1880	0.177347	0.177347	0.177347	0.177347	0.177347	0.177347	0.0893174	0.0893174	0.0893174	0.0893174	0.177347	0.177347	0.0893174	0.0893174	0.0893174	0.146877	0.0893174	0.0893174	0.0893174	0.146877	0.0893174	0.0893174	0.177347	0.177347	0.0893174	0.0893174
2100	1900	0.177862	0.177862	0.177862	0.177862	0.177862	0.177862	0.0894031	0.0894031	0.0894031	0.0894031	0.177862	0.177862	0.0894031	0.0894031	0.0894031	0.147251	0.0894031	0.0894031	0.0894031	0.147251	0.0894031	0.0894031	0.177862	0.177862	0.0894031	0.0894031
2100	1920	0.178392	0.178392	0.178392	0.178392	0.178392	0.178392	0.0894884	0.0894884	0.0894884	0.0894884	0.178392	0.178392	0.0894884	0.0894884	0.0894884	0.147487	0.0894884	0.0894884	0.0894884	0.147487	0.0894884	0.0894884	0.178392	0.178392	0.0894884	0.0894884
2100	1940	0.178828	0.178828	0.178828	0.178828	0.178828	0.178828	0.0895946	0.0895946	0.0895946	0.0895946	0.178828	0.178828	0.0895946	0.0895946	0.0895946	0.147634	0.0895946	0.0895946	0.0895946	0.147634	0.0895946	0.0895946	0.178828	0.178828	0.0895946	0.0895946
2100	1960	0.179368	0.179368	0.179368	0.179368	0.179368	0.179368	0.0898039	0.0898039	0.0898039	0.0898039	0.179368	0.179368	0.0898039	0.0898039	0.0898039	0.147816	0.0898039	0.0898039	0.0898039	0.147816	0.0898039	0.0898039	0.179368	0.179368	0.0898039	0.0898039
2100	1980	0.179483	0.179483	0.179483	0.179483	0.179483	0.179483	0.0898703	0.0898703	0.0898703	0.0898703	0.179483	0.179483	0.0898703	0.0898703	0.0898703	0.1479	0.0898703	0.0898703	0.0898703	0.1479	0.0898703	0.0898703	0.179483	0.179483	0.0898703	0.0898703
2100	2000	0.179848	0.179848	0.179848	0.179848	0.179848	0.179848	0.089966	0.089966	0.089966	0.089966	0.179848	0.179848	0.089966	0.089966	0.089966	0.148001	0.089966	0.089966	0.089966	0.148001	0.089966	0.089966	0.179848	0.179848	0.089966	0.089966
2100	2020	0.179993	0.179993	0.179993	0.179993	0.179993	0.179993	0.0900415	0.0900415	0.0900415	0.0900415	0.179993	0.179993	0.0900415	0.0900415	0.0900415	0.148244	0.0900415	0.0900415	0.0900415	0.148244	0.0900415	0.0900415	0.179993	0.179993	0.0900415	0.0900415
2100	2040	0.180383	0.180383	0.180383	0.180383	0.180383	0.180383	0.0900867	0.0900867	0.0900867	0.0900867	0.180383	0.180383	0.0900867	0.0900867	0.0900867	0.148549	0.0900867	0.0900867	0.0900867	0.148549	0.0900867	0.0900867	0.180383	0.180383	0.0900867	0.0900867
2100	2060	0.18056	0.18056	0.18056	0.18056	0.18056	0.18056	0.090229	0.090229	0.090229	0.090229	0.18056	0.18056	0.090229	0.090229	0.090229	0.148639	0.090229	0.090229	0.090229	0.148639	0.090229	0.090229	0.18056	0.18056	0.090229	0.090229
2100	2080	0.180746	0.180746	0.180746	0.180746	0.180746	0.180746	0.0902904	0.0902904	0.0902904	0.0902904	0.180746	0.180746	0.0902904	0.0902904	0.0902904	0.148744	0.0902904	0.0902904	0.0902904	0.148744	0.0902904	0.0902904	0.180746	0.180746	0.0902904	0.0902904
2100	2100	0.180889	0.180889	0.180889	0.180889	0.180889	0.180889	0.0903594	0.0903594	0.0903594	0.0903594	0.180889	0.180889	0.0903594	0.0903594	0.0903594	0.148799	0.0903594	0.0903594	0.0903594	0.148799	0.0903594	0.0903594	0.180889	0.180889	0.0903594	0.0903594
2100	2120	0.181268	0.181268	0.181268	0.181268	0.181268	0.181268	0.0903638	0.0903638	0.0903638	0.0903638	0.181268	0.181268	0.0903638	0.0903638	0.0903638	0.148917	0.0903638	0.0903638	0.0903638	0.148917	0.0903638	0.0903638	0.181268	0.181268	0.0903638	0.0903638
2100	2140	0.181344	0.181344	0.181344	0.181344	0.181344	0.181344	0.0903966	0.0903966	0.0903966	0.0903966	0.181344	0.181344	0.0903966	0.0903966	0.0903966	0.148949	0.0903966	0.0903966	0.0903966	0.148949	0.0903966	0.0903966	0.181344	0.181344	0.0903966	0.0903966
2100	2160	0.181492	0.181492	0.181492	0.181492	0.181492	0.181492	0.0905197	0.0905197	0.0905197	0.0905197	0.181492	0.181492	0.0905197	0.0905197	0.0905197	0.148987	0.0905197	0.0905197	0.0905197	0.148987	0.0905197	0.0905197	0.181492	0.181492	0.0905197	0.0905197
2100	2180	0.181844	0.181844	0.181844	0.181844	0.181844	0.181844	0.0905927	0.0905927	0.0905927	0.0905927	0.181844	0.181844	0.0905927	0.0905927	0.0905927	0.149007	0.0905927	0.0905927	0.0905927	0.149007	0.0905927	0.0905927	0.181844	0.181844	0.0905927	0.0905927
2100	2200	0.181964	0.181964	0.181964	0.181964	0.181964	0.181964	0.0906851	0.0906851	0.0906851	0.0906851	0.181964	0.181964	0.0906851	0.0906851	0.0906851	0.149133	0.0906851	0.0906851	0.0906851	0.149133	0.0906851	0.0906851	0.181964	0.181964	0.0906851	0.0906851
2100	2220	0.181992	0.181992	0.181992	0.181992	0.181992	0.181992	0.0907487	0.0907487	0.0907487	0.0907487	0.181992	0.181992	0.0907487	0.0907487	0.0907487	0.149263	0.0907487	0.0907487	0.0907487	0.149263	0.0907487	0.0907487	0.181992	0.181992	0.0907487	0.0907487
2100	2240	0.182066	0.182066	0.182066	0.182066	0.182066	0.182066	0.0908225	0.0908225	0.0908225	0.0908225	0.182066	0.182066	0.0908225	0.0908225	0.0908225	0.149442	0.0908225	0.0908225	0.0908225	0.149442	0.0908225	0.0908225	0.182066	0.182066	0.0908225	0.0908225
2100	2260	0.182264	0.182264	0.182264	0.182264	0.182264	0.182264	0.0909039	0.0909039	0.0909039	0.0909039	0.182264	0.182264	0.0909039	0.0909039	0.0909039	0.14953	0.0909039	0.0909039	0.0909039	0.14953	0.0909039	0.0909039	0.182264	0.182264	0.0909039	0.0909039
2100	2280	0.182385	0.182385	0.182385	0.182385	0.182385	0.182385	0.0909867	0.0909867	0.0909867	0.0909867	0.182385	0.182385	0.0909867	0.0909867	0.0909867	0.149656	0.0909867	0.0909867	0.0909867	0.149656	0.0909867	0.0909867	0.182385	0.182385	0.0909867	0.0909867
2100	2300	0.18247	0.18247	0.18247	0.18247	0.18247	0.18247	0.09106	0.09106	0.09106	0.09106	0.18247	0.18247	0.09106	0.09106	0.09106	0.149775	0.09106	0.09106	0.09106	0.149775	0.09106	0.09106	0.18247	0.18247	0.09106	0.09106
2100	2320	0.18264	0.18264	0.18264	0.18264	0.18264	0.18264	0.0910783	0.0910783	0.0910783	0.0910783	0.18264	0.18264	0.0910783	0.0910783	0.0910783	0.149808	0.0910783	0.0910783	0.0910783	0.149808	0.0910783	0.0910783	0.18264	0.18264	0.0910783	0.0910783
2100	2340	0.182796	0.182796	0.182796	0.182796	0.182796	0.182796	0.0911678	0.0911678	0.0911678	0.0911678	0.182796	0.182796	0.0911678	0.0911678	0.0911678	0.14994	0.0911678	0.0911678	0.0911678	0.14994	0.0911678	0.0911678	0.182796	0.182796	0.0911678	0.0911678
2100	2360	0.182952	0.182952	0.182952	0.182952	0.182952	0.182952	0.0912156	0.0912156	0.0912156	0.0912156	0.182952	0.182952	0.0912156	0.0912156	0.0912156	0.150065	0.0912156	0.0912156	0.0912156	0.150065	0.0912156	0.0912156	0.182952	0.182952	0.0912156	0.0912156
2100	2380	0.183188	0.183188	0.183188	0.183188	0.183188	0.183188	0.09123	0.09123	0.09123	0.09123	0.183188	0.183188	0.09123	0.09123	0.09123	0.150159	0.09123	0.09123	0.09123	0.150159	0.09123	0.09123	0.183188	0.183188	0.09123	0.09123
2100	2400	0.183403	0.183403	0.183403	0.183403	0.183403	0.183403	0.0912646	0.0912646	0.0912646	0.0912646	0.183403	0.183403	0.0912646	0.0912646	0.0912646	0.150417	0.0912646	0.0912646	0.0912646	0.150417	0.0912646	0.0912646	0.183403	0.183403	0.0912646	0.0912646
2100	2420	0.183492	0.183492	0.183492	0.183492	0.183492	0.183492	0.091327	0.091327	0.091327	0.091327	0.183492	0.183492	0.091327	0.091327	0.091327	0.150521	0.091327	0.091327	0.091327	0.150521	0.091327	0.091327	0.183492	0.183492	0.091327	0.091327
2100	2440	0.183593	0.183593	0.183593	0.183593	0.183593	0.183593	0.0914368	0.0914368	0.0914368	0.0914368	0.183593	0.183593	0.0914368	0.0914368	0.0914368	0.15062	0.0914368	0.0914368	0.0914368	0.15062	0.0914368	0.0914368	0.183593	0.183593	0.0914368	0.0914368
2100	2460	0.183815	0.183815	0.183815	0.183815	0.183815	0.183815	0.091463	0.091463	0.091463	0.091463	0.183815	0.183815	0.091463	0.091463	0.091463	0.150725	0.091463	0.091463	0.091463	0.150725	0.091463	0.091463	0.183815	0.183815	0.091463	0.091463
2100	2480	0.183913	0.183913	0.183913	0.183913	0.183913	0.183913	0.0915687	0.0915687	0.0915687	0.0915687	0.183913	0.183913	0.0915687	0.0915687	0.0915687	0.150883	0.0915687	0.0915687	0.0915687	0.150883	0.0915687	0.0915687	0.183913	0.183913	0.0915687	0.0915687
2100	2500	0.18407	0.18407	0.18407	0.18407	0.18407	0.18407	0.0915978	0.0915978	0.0915978	0.0915978	0.18407	0.18407	0.0915978	0.0915978	0.0915978	0.151258	0.0915978	0.0915978	0.0915978	0.151258	0.0915978	0.0915978	0.18407	0.18407	0.0915978	0.0915978
2100	2520	0.184266	0.184266	0.184266	0.184266	0.184266	0.184266	0.0916482	0.0916482	0.0916482	0.0916482	0.184266	0.184266	0.0916482	0.0916482	0.0916482	0.151277	0.0916482	0.0916482	0.0916482	0.151277	0.0916482	0.0916482	0.184266	0.184266	0.0916482	0.0916482
2100	2540	0.184308	0.184308	0.184308	0.184308	0.184308	0.184308	0.0918802	0.0918802	0.0918802	0.0918802	0.184308	0.184308	0.0918802	0.0918802	0.0918802	0.151295	0.0918802	0.0918802	0.0918802	0.151295	0.0918802	0.0918802	0.184308	0.184308	0.0918802	0.0918802
2100	2560	0.184456	0.184456	0.184456	0.184456	0.184456	0.184456	0.0919384	0.0919384	0.0919384	0.0919384	0.184456	0.184456	0.0919384	0.0919384	0.0919384	0.151425	0.0919384	0.0919384	0.0919384	0.151425	0.0919384	0.0919384	0.184456	0.184456	0.0919384	0.0919384
2100	2580	0.184588	0.184588	0.184588	0.184588	0.184588	0.184588	0.0920502	0.0920502	0.0920502	0.0920502	0.184588	0.184588	0.0920502	0.0920502	0.0920502	0.151472	0.0920502	0.0920502	0.0920502	0.151472	0.0920502	0.0920502	0.184588	0.184588	0.0920502	0.0920502
2100	2600	0.184659	0.184659	0.184659	0.184659	0.184659	0.184659	0.0921734	0.0921734	0.0921734	0.0921734	0.184659	0.184659	0.0921734	0.0921734	0.0921734	0.151618	0.0921734	0.0921734	0.0921734	0.151618	0.0921734	0.0921734	0.184659	0.184659	0.0921734	0.0921734
2100	2620	0.184773	0.184773	0.184773	0.184773	0.184773	0.184773	0.092298	0.092298	0.092298	0.092298	0.184773	0.184773	0.092298	0.092298	0.092298	0.15173	0.092298	0.092298	0.092298	0.15173	0.092298	0.092298	0.184773	0.184773	0.092298	0.092298
2100	2640	0.184821	0.184821	0.184821	0.184821	0.184821	0.184821	0.0924224	0.0924224	0.0924224	0.0924224	0.184821	0.184821	0.0924224	0.0924224	0.0924224	0.151807	0.0924224	0.0924224	0.0924224	0.151807	0.0924224	0.0924224	0.184821	0.184821	0.0924224	0.0924224
2100	2660	0.184969	0.184969	0.184969	0.184969	0.184969	0.184969	0.0924752	0.0924752	0.0924752	0.0924752	0.184969	0.184969	0.0924752	0.0924752	0.0924752	0.151898	0.0924752	0.0924752	0.0924752	0.151898	0.0924752	0.0924752	0.184969	0.184969	0.0924752	0.0924752
2100	2680	0.185117	0.185117	0.185117	0.185117	0.185117	0.185117	0.0925438	0.0925438	0.0925438	0.0925438	0.185117	0.185117	0.0925438	0.0925438	0.0925438	0.151984	0.0925438	0.0925438	0.0925438	0.151984	0.0925438	0.0925438	0.185117	0.185117	0.0925438	0.0925438
2100	2700	0.185298	0.185298	0.185298	0.185298	0.185298	0.185298	0.0926655	0.0926655	0.0926655	0.0926655	0.185298	0.185298	0.0926655	0.0926655	0.0926655	0.152204	0.0926655	0.0926655	0.0926655	0.152204	0.0926655	0.0926655	0.185298	0.185298	0.0926655	0.0926655
2100	2720	0.185517	0.185517	0.185517	0.185517	0.185517	0.185517	0.0927382	0.0927382	0.0927382	0.0927382	0.185517	0.185517	0.0927382	0.0927382	0.0927382	0.152488	0.0927382	0.0927382	0.0927382	0.152488	0.0927382	0.0927382	0.185517	0.185517	0.0927382	0.0927382
2100	2740	0.185522	0.185522	0.185522	0.185522	0.185522	0.185522	0.092898	0.092898	0.092898	0.092898	0.185522	0.185522	0.092898	0.092898	0.092898	0.152627	0.092898	0.092898	0.092898	0.152627	0.092898	0.092898	0.185522	0.185522	0.092898	0.092898
2100	2760	0.185614	0.185614	0.185614	0.185614	0.185614	0.185614	0.0930028	0.0930028	0.0930028	0.0930028	0.185614	0.185614	0.0930028	0.0930028	0.0930028	0.152761	0.0930028	0.0930028	0.0930028	0.152761	0.0930028	0.0930028	0.185614	0.185614	0.0930028	0.0930028
2100	2780	0.18584	0.18584	0.18584	0.18584	0.18584	0.18584	0.0930371	0.0930371	0.0930371	0.0930371	0.18584	0.18584	0.0930371	0.0930371	0.0930371	0.152899	0.0930371	0.0930371	0.0930371	0.152899	0.0930371	0.0930371	0.18584	0.18584	0.0930371	0.0930371
2100	2800	0.185991	0.185991	0.185991	0.185991	0.185991	0.185991	0.0931236	0.0931236	0.0931236	0.0931236	0.185991	0.185991	0.0931236	0.0931236	0.0931236	0.15294	0.0931236	0.0931236	0.0931236	0.15294	0.0931236	0.0931236	0.185991	0.185991	0.0931236	0.0931236
2100	2820	0.186035	0.186035	0.186035	0.186035	0.186035	0.186035	0.0931434	0.0931434	0.0931434	0.0931434	0.186035	0.186035	0.0931434	0.0931434	0.0931434	0.153212	0.0931434	0.0931434	0.0931434	0.153212	0.0931434	0.0931434	0.186035	0.186035	0.0931434	0.0931434
2100	2840	0.186069	0.186069	0.186069	0.186069	0.186069	0.186069	0.0931777	0.0931777	0.0931777	0.0931777	0.186069	0.186069	0.0931777	0.0931777	0.0931777	0.153335	0.0931777	0.0931777	0.0931777	0.153335	0.0931777	0.0931777	0.186069	0.186069	0.0931777	0.0931777
2100	2860	0.186265	0.186265	0.186265	0.186265	0.186265	0.186265	0.0932697	0.0932697	0.0932697	0.0932697	0.186265	0.186265	0.0932697	0.0932697	0.0932697	0.153401	0.0932697	0.0932697	0.0932697	0.153401	0.0932697	0.0932697	0.186265	0.186265	0.0932697	0.0932697
2100	2880	0.186361	0.186361	0.186361	0.186361	0.186361	0.186361	0.0933846	0.0933846	0.0933846	0.0933846	0.186361	0.186361	0.0933846	0.0933846	0.0933846	0.153444	0.0933846	0.0933846	0.0933846	0.153444	0.0933846	0.0933846	0.186361	0.186361	0.0933846	0.0933846
2100	2900	0.186496	0.186496	0.186496	0.186496	0.186496	0.186496	0.0934728	0.0934728	0.0934728	0.0934728	0.186496	0.186496	0.0934728	0.0934728	0.0934728	0.153456	0.0934728	0.0934728	0.0934728	0.153456	0.0934728	0.0934728	0.186496	0.186496	0.0934728	0.0934728
2100	2920	0.186583	0.186583	0.186583	0.186583	0.186583	0.186583	0.0934776	0.0934776	0.0934776	0.0934776	0.186583	0.186583	0.0934776	0.0934776	0.0934776	0.153793	0.0934776	0.0934776	0.0934776	0.153793	0.0934776	0.0934776	0.186583	0.186583	0.0934776	0.0934776
2100	2940	0.186709	0.186709	0.186709	0.186709	0.186709	0.186709	0.093512	0.093512	0.093512	0.093512	0.186709	0.186709	0.093512	0.093512	0.093512	0.153881	0.093512	0.093512	0.093512	0.153881	0.093512	0.093512	0.186709	0.186709	0.093512	0.093512
2100	2960	0.186939	0.186939	0.186939	0.186939	0.186939	0.186939	0.0937267	0.0937267	0.0937267	0.0937267	0.186939	0.186939	0.0937267	0.0937267	0.0937267	0.154029	0.0937267	0.0937267	0.0937267	0.154029	0.0937267	0.0937267	0.186939	0.186939	0.0937267	0.0937267
2100	2980	0.186953	0.186953	0.186953	0.186953	0.186953	0.186953	0.093796	0.093796	0.093796	0.093796	0.186953	0.186953	0.093796	0.093796	0.093796	0.154212	0.093796	0.093796	0.093796	0.154212	0.093796	0.093796	0.186953	0.186953	0.093796	0.093796
2100	3000	0.187057	0.187057	0.187057	0.187057	0.187057	0.187057	0.0938535	0.0938535	0.0938535	0.0938535	0.187057	0.187057	0.0938535	0.0938535	0.0938535	0.154357	0.0938535	0.0938535	0.0938535	0.154357	0.0938535	0.0938535	0.187057	0.187057	0.0938535	0.0938535
2100	3020	0.187211	0.187211	0.187211	0.187211	0.187211	0.187211	0.093883	0.093883	0.093883	0.093883	0.187211	0.187211	0.093883	0.093883	0.093883	0.1544	0.093883	0.093883	0.093883	0.1544	0.093883	0.093883	0.187211	0.187211	0.093883	0.093883
2100	3040	0.190678	0.190678	0.190678	0.190678	0.190678	0.190678	0.0976865	0.0976865	0.0976865	0.0976865	0.190678	0.190678	0.0976865	0.0976865	0.0976865	0.157896	0.0976865	0.0976865	0.0976865	0.157896	0.0976865	0.0976865	0.190678	0.190678	0.0976865	0.0976865
2100	3060	0.194145	0.194145	0.194145	0.194145	0.194145	0.194145	0.10149	0.10149	0.10149	0.10149	0.194145	0.194145	0.10149	0.10149	0.10149	0.161392	0.10149	0.10149	0.10149	0.161392	0.10149	0.10149	0.194145	0.194145	0.10149	0.10149
2100	3080	0.197611	0.197611	0.197611	0.197611	0.197611	0.197611	0.105294	0.105294	0.105294	0.105294	0.197611	0.197611	0.105294	0.105294	0.105294	0.164888	0.105294	0.105294	0.105294	0.164888	0.105294	0.105294	0.197611	0.197611	0.105294	0.105294
2100	3100	0.201078	0.201078	0.201078	0.201078	0.201078	0.201078	0.109097	0.109097	0.109097	0.109097	0.201078	0.201078	0.109097	0.109097	0.109097	0.168384	0.109097	0.109097	0.109097	0.168384	0.109097	0.109097	0.201078	0.201078	0.109097	0.109097
2100	3120	0.204545	0.204545	0.204545	0.204545	0.204545	0.204545	0.112901	0.112901	0.112901	0.112901	0.204545	0.204545	0.112901	0.112901	0.112901	0.171881	0.112901	0.112901	0.112901	0.171881	0.112901	0.112901	0.204545	0.204545	0.112901	0.112901
2100	3140	0.208011	0.208011	0.208011	0.208011	0.208011	0.208011	0.116704	0.116704	0.116704	0.116704	0.208011	0.208011	0.116704	0.116704	0.116704	0.175377	0.116704	0.116704	0.116704	0.175377	0.116704	0.116704	0.208011	0.208011	0.116704	0.116704
2100	3160	0.211478	0.211478	0.211478	0.211478	0.211478	0.211478	0.120508	0.120508	0.120508	0.120508	0.211478	0.211478	0.120508	0.120508	0.120508	0.178873	0.120508	0.120508	0.120508	0.178873	0.120508	0.120508	0.211478	0.211478	0.120508	0.120508
2100	3180	0.214945	0.214945	0.214945	0.214945	0.214945	0.214945	0.124311	0.124311	0.124311	0.124311	0.214945	0.214945	0.124311	0.124311	0.124311	0.182369	0.124311	0.124311	0.124311	0.182369	0.124311	0.124311	0.214945	0.214945	0.124311	0.124311
2100	3200	0.218412	0.218412	0.218412	0.218412	0.218412	0.218412	0.128115	0.128115	0.128115	0.128115	0.218412	0.218412	0.128115	0.128115	0.128115	0.185865	0.128115	0.128115	0.128115	0.185865	0.128115	0.128115	0.218412	0.218412	0.128115	0.128115
2100	3220	0.221878	0.221878	0.221878	0.221878	0.221878	0.221878	0.131918	0.131918	0.131918	0.131918	0.221878	0.221878	0.131918	0.131918	0.131918	0.189361	0.131918	0.131918	0.131918	0.189361	0.131918	0.131918	0.221878	0.221878	0.131918	0.131918
2100	3240	0.225345	0.225345	0.225345	0.225345	0.225345	0.225345	0.135722	0.135722	0.135722	0.135722	0.225345	0.225345	0.135722	0.135722	0.135722	0.192857	0.135722	0.135722	0.135722	0.192857	0.135722	0.135722	0.225345	0.225345	0.135722	0.135722
2100	3260	0.228812	0.228812	0.228812	0.228812	0.228812	0.228812	0.139525	0.139525	0.139525	0.139525	0.228812	0.228812	0.139525	0.139525	0.139525	0.196353	0.139525	0.139525	0.139525	0.196353	0.139525	0.139525	0.228812	0.228812	0.139525	0.139525
2100	3280	0.232278	0.232278	0.232278	0.232278	0.232278	0.232278	0.143329	0.143329	0.143329	0.143329	0.232278	0.232278	0.143329	0.143329	0.143329	0.199849	0.143329	0.143329	0.143329	0.199849	0.143329	0.143329	0.232278	0.232278	0.143329	0.143329
2100	3300	0.235745	0.235745	0.235745	0.235745	0.235745	0.235745	0.147132	0.147132	0.147132	0.147132	0.235745	0.235745	0.147132	0.147132	0.147132	0.203345	0.147132	0.147132	0.147132	0.203345	0.147132	0.147132	0.235745	0.235745	0.147132	0.147132
2100	3320	0.239212	0.239212	0.239212	0.239212	0.239212	0.239212	0.150936	0.150936	0.150936	0.150936	0.239212	0.239212	0.150936	0.150936	0.150936	0.206841	0.150936	0.150936	0.150936	0.206841	0.150936	0.150936	0.239212	0.239212	0.150936	0.150936
2100	3340	0.242678	0.242678	0.242678	0.242678	0.242678	0.242678	0.154739	0.154739	0.154739	0.154739	0.242678	0.242678	0.154739	0.154739	0.154739	0.210337	0.154739	0.154739	0.154739	0.210337	0.154739	0.154739	0.242678	0.242678	0.154739	0.154739
2100	3360	0.246145	0.246145	0.246145	0.246145	0.246145	0.246145	0.158543	0.158543	0.158543	0.158543	0.246145	0.246145	0.158543	0.158543	0.158543	0.213833	0.158543	0.158543	0.158543	0.213833	0.158543	0.158543	0.246145	0.246145	0.158543	0.158543
2100	3380	0.249612	0.249612	0.249612	0.249612	0.249612	0.249612	0.162346	0.162346	0.162346	0.162346	0.249612	0.249612	0.162346	0.162346	0.162346	0.217329	0.162346	0.162346	0.162346	0.217329	0.162346	0.162346	0.249612	0.249612	0.162346	0.162346
2100	3400	0.253079	0.253079	0.253079	0.253079	0.253079	0.253079	0.16615	0.16615	0.16615	0.16615	0.253079	0.253079	0.16615	0.16615	0.16615	0.220826	0.16615	0.16615	0.16615	0.220826	0.16615	0.16615	0.253079	0.253079	0.16615	0.16615
2100	3420	0.256545	0.256545	0.256545	0.256545	0.256545	0.256545	0.169953	0.169953	0.169953	0.169953	0.256545	0.256545	0.169953	0.169953	0.169953	0.224322	0.169953	0.169953	0.169953	0.224322	0.169953	0.169953	0.256545	0.256545	0.169953	0.169953
2100	3440	0.260012	0.260012	0.260012	0.260012	0.260012	0.260012	0.173757	0.173757	0.173757	0.173757	0.260012	0.260012	0.173757	0.173757	0.173757	0.227818	0.173757	0.173757	0.173757	0.227818	0.173757	0.173757	0.260012	0.260012	0.173757	0.173757
2100	3460	0.263479	0.263479	0.263479	0.263479	0.263479	0.263479	0.17756	0.17756	0.17756	0.17756	0.263479	0.263479	0.17756	0.17756	0.17756	0.231314	0.17756	0.17756	0.17756	0.231314	0.17756	0.17756	0.263479	0.263479	0.17756	0.17756
2100	3480	0.266945	0.266945	0.266945	0.266945	0.266945	0.266945	0.181364	0.181364	0.181364	0.181364	0.266945	0.266945	0.181364	0.181364	0.181364	0.23481	0.181364	0.181364	0.181364	0.23481	0.181364	0.181364	0.266945	0.266945	0.181364	0.181364
2100	3500	0.270412	0.270412	0.270412	0.270412	0.270412	0.270412	0.185167	0.185167	0.185167	0.185167	0.270412	0.270412	0.185167	0.185167	0.185167	0.238306	0.185167	0.185167	0.185167	0.238306	0.185167	0.185167	0.270412	0.270412	0.185167	0.185167
2100	3520	0.273879	0.273879	0.273879	0.273879	0.273879	0.273879	0.188971	0.188971	0.188971	0.188971	0.273879	0.273879	0.188971	0.188971	0.188971	0.241802	0.188971	0.188971	0.188971	0.241802	0.188971	0.188971	0.273879	0.273879	0.188971	0.188971
2100	3540	0.277346	0.277346	0.277346	0.277346	0.277346	0.277346	0.192774	0.192774	0.192774	0.192774	0.277346	0.277346	0.192774	0.192774	0.192774	0.245298	0.192774	0.192774	0.192774	0.245298	0.192774	0.192774	0.277346	0.277346	0.192774	0.192774
2100	3560	0.280812	0.280812	0.280812	0.280812	0.280812	0.280812	0.196578	0.196578	0.196578	0.196578	0.280812	0.280812	0.196578	0.196578	0.196578	0.248794	0.196578	0.196578	0.196578	0.248794	0.196578	0.196578	0.280812	0.280812	0.196578	0.196578
2100	3580	0.284279	0.284279	0.284279	0.284279	0.284279	0.284279	0.200381	0.200381	0.200381	0.200381	0.284279	0.284279	0.200381	0.200381	0.200381	0.25229	0.200381	0.200381	0.200381	0.25229	0.200381	0.200381	0.284279	0.284279	0.200381	0.200381
2100	3600	0.287746	0.287746	0.287746	0.287746	0.287746	0.287746	0.204185	0.204185	0.204185	0.204185	0.287746	0.287746	0.204185	0.204185	0.204185	0.255786	0.204185	0.204185	0.204185	0.255786	0.204185	0.204185	0.287746	0.287746	0.204185	0.204185
2100	3620	0.291212	0.291212	0.291212	0.291212	0.291212	0.291212	0.207988	0.207988	0.207988	0.207988	0.291212	0.291212	0.207988	0.207988	0.207988	0.259282	0.207988	0.207988	0.207988	0.259282	0.207988	0.207988	0.291212	0.291212	0.207988	0.207988
2100	3640	0.294679	0.294679	0.294679	0.294679	0.294679	0.294679	0.211792	0.211792	0.211792	0.211792	0.294679	0.294679	0.211792	0.211792	0.211792	0.262778	0.211792	0.211792	0.211792	0.262778	0.211792	0.211792	0.294679	0.294679	0.211792	0.211792
2100	3660	0.298146	0.298146	0.298146	0.298146	0.298146	0.298146	0.215596	0.215596	0.215596	0.215596	0.298146	0.298146	0.215596	0.215596	0.215596	0.266274	0.215596	0.215596	0.215596	0.266274	0.215596	0.215596	0.298146	0.298146	0.215596	0.215596
2100	3680	0.301613	0.301613	0.301613	0.301613	0.301613	0.301613	0.219399	0.219399	0.219399	0.219399	0.301613	0.301613	0.219399	0.219399	0.219399	0.269771	0.219399	0.219399	0.219399	0.269771	0.219399	0.219399	0.301613	0.301613	0.219399	0.219399
2100	3700	0.305079	0.305079	0.305079	0.305079	0.305079	0.305079	0.223203	0.223203	0.223203	0.223203	0.305079	0.305079	0.223203	0.223203	0.223203	0.273267	0.223203	0.223203	0.223203	0.273267	0.223203	0.223203	0.305079	0.305079	0.223203	0.223203
2100	3720	0.308546	0.308546	0.308546	0.308546	0.308546	0.308546	0.227006	0.227006	0.227006	0.227006	0.308546	0.308546	0.227006	0.227006	0.227006	0.276763	0.227006	0.227006	0.227006	0.276763	0.227006	0.227006	0.308546	0.308546	0.227006	0.227006
2100	3740	0.312013	0.312013	0.312013	0.312013	0.312013	0.312013	0.23081	0.23081	0.23081	0.23081	0.312013	0.312013	0.23081	0.23081	0.23081	0.280259	0.23081	0.23081	0.23081	0.280259	0.23081	0.23081	0.312013	0.312013	0.23081	0.23081
2100	3760	0.315479	0.315479	0.315479	0.315479	0.315479	0.315479	0.234613	0.234613	0.234613	0.234613	0.315479	0.315479	0.234613	0.234613	0.234613	0.283755	0.234613	0.234613	0.234613	0.283755	0.234613	0.234613	0.315479	0.315479	0.234613	0.234613
2100	3780	0.318946	0.318946	0.318946	0.318946	0.318946	0.318946	0.238417	0.238417	0.238417	0.238417	0.318946	0.318946	0.238417	0.238417	0.238417	0.287251	0.238417	0.238417	0.238417	0.287251	0.238417	0.238417	0.318946	0.318946	0.238417	0.238417
2100	3800	0.322413	0.322413	0.322413	0.322413	0.322413	0.322413	0.24222	0.24222	0.24222	0.24222	0.322413	0.322413	0.24222	0.24222	0.24222	0.290747	0.24222	0.24222	0.24222	0.290747	0.24222	0.24222	0.322413	0.322413	0.24222	0.24222
2100	3820	0.325879	0.325879	0.325879	0.325879	0.325879	0.325879	0.246024	0.246024	0.246024	0.246024	0.325879	0.325879	0.246024	0.246024	0.246024	0.294243	0.246024	0.246024	0.246024	0.294243	0.246024	0.246024	0.325879	0.325879	0.246024	0.246024
2100	3840	0.329346	0.329346	0.329346	0.329346	0.329346	0.329346	0.249827	0.249827	0.249827	0.249827	0.329346	0.329346	0.249827	0.249827	0.249827	0.297739	0.249827	0.249827	0.249827	0.297739	0.249827	0.249827	0.329346	0.329346	0.249827	0.249827
2100	3860	0.332813	0.332813	0.332813	0.332813	0.332813	0.332813	0.253631	0.253631	0.253631	0.253631	0.332813	0.332813	0.253631	0.253631	0.253631	0.301235	0.253631	0.253631	0.253631	0.301235	0.253631	0.253631	0.332813	0.332813	0.253631	0.253631
2100	3880	0.33628	0.33628	0.33628	0.33628	0.33628	0.33628	0.257434	0.257434	0.257434	0.257434	0.33628	0.33628	0.257434	0.257434	0.257434	0.304731	0.257434	0.257434	0.257434	0.304731	0.257434	0.257434	0.33628	0.33628	0.257434	0.257434
2100	3900	0.339746	0.339746	0.339746	0.339746	0.339746	0.339746	0.261238	0.261238	0.261238	0.261238	0.339746	0.339746	0.261238	0.261238	0.261238	0.308227	0.261238	0.261238	0.261238	0.308227	0.261238	0.261238	0.339746	0.339746	0.261238	0.261238
2100	3920	0.343213	0.343213	0.343213	0.343213	0.343213	0.343213	0.265041	0.265041	0.265041	0.265041	0.343213	0.343213	0.265041	0.265041	0.265041	0.311723	0.265041	0.265041	0.265041	0.311723	0.265041	0.265041	0.343213	0.343213	0.265041	0.265041
2100	3940	0.34668	0.34668	0.34668	0.34668	0.34668	0.34668	0.268845	0.268845	0.268845	0.268845	0.34668	0.34668	0.268845	0.268845	0.268845	0.315219	0.268845	0.268845	0.268845	0.315219	0.268845	0.268845	0.34668	0.34668	0.268845	0.268845
2100	3960	0.350146	0.350146	0.350146	0.350146	0.350146	0.350146	0.272648	0.272648	0.272648	0.272648	0.350146	0.350146	0.272648	0.272648	0.272648	0.318715	0.272648	0.272648	0.272648	0.318715	0.272648	0.272648	0.350146	0.350146	0.272648	0.272648
2100	3980	0.353613	0.353613	0.353613	0.353613	0.353613	0.353613	0.276452	0.276452	0.276452	0.276452	0.353613	0.353613	0.276452	0.276452	0.276452	0.322212	0.276452	0.276452	0.276452	0.322212	0.276452	0.276452	0.353613	0.353613	0.276452	0.276452
2100	4000	0.35708	0.35708	0.35708	0.35708	0.35708	0.35708	0.280255	0.280255	0.280255	0.280255	0.35708	0.35708	0.280255	0.280255	0.280255	0.325708	0.280255	0.280255	0.280255	0.325708	0.280255	0.280255	0.35708	0.35708	0.280255	0.280255

## Sheet: CH4_land_D
t	Implementation costs	Canada	USA	Mexico	Central America	Brazil	Rest of South-America	North Africa	West Africa	East Africa	South Africa	West Europe	Central Europe	Turkey	Ukraine	Kazachstan	Russia	Middle East	India	Korea	China+	South East Asia	Indonesia	Japan	Oceania	Rest of South Asia	Rest of South Africa
2020	0	-3.88896	-1.57375	0.515352	0.207161	0.626549	0.543833	0.484361	0.705637	0.662358	-0.0780781	-0.0100871	-0.32341	-1.41263	-0.665936	-0.166861	-0.999491	0.422226	0.634254	0.541453	0.27947	0.348674	0.0378075	0.79	-0.996513	0.564987	0.73108
2020	20	-3.24893	-1.52669	0.515352	0.207377	0.626549	0.543962	0.48885	0.708339	0.66541	-0.0690488	0.116289	-0.159341	-1.41263	-0.665936	-0.166861	-0.798175	0.504351	0.64566	0.548776	0.300839	0.358826	0.0378075	0.79	-0.760772	0.571965	0.733577
2020	40	-2.74982	-1.45703	0.515352	0.207377	0.626549	0.543962	0.495583	0.712393	0.669988	-0.055505	0.344573	0.137033	-1.41263	-0.665936	-0.166861	-0.656546	0.525322	0.64566	0.552687	0.300839	0.364247	0.0378075	0.79	-0.518274	0.57569	0.737323
2020	60	-2.395	-1.40225	0.515352	0.208185	0.626549	0.544443	0.518249	0.726039	0.685398	-0.00991114	0.48227	0.315801	-1.41263	-0.665936	-0.166861	-0.514916	0.53168	0.66279	0.555463	0.332933	0.368096	0.0378075	0.79	-0.362549	0.578336	0.749932
2020	80	-2.17815	-1.38529	0.515352	0.208474	0.626549	0.544615	0.555379	0.748393	0.710643	0.0647765	0.558086	0.41423	-1.41263	-0.665936	-0.166861	-0.335481	0.53168	0.701333	0.561767	0.405146	0.376836	0.0378075	0.79	-0.273888	0.584343	0.770587
2020	100	-2.07457	-1.37719	0.577304	0.212763	0.626549	0.547172	0.558857	0.750487	0.713007	0.0717723	0.595488	0.462787	-1.41263	-0.600949	-0.120882	-0.335481	0.553959	0.707043	0.56267	0.415844	0.378087	0.0378075	0.79	-0.237107	0.585202	0.772522
2020	120	-1.5181	-1.37367	0.577304	0.214051	0.626549	0.547939	0.575359	0.760422	0.724226	0.104965	0.610598	0.482403	-1.14362	-0.565884	-0.0960728	-0.335481	0.553959	0.756063	0.580525	0.507684	0.402842	0.0378075	0.79	-0.221039	0.602216	0.781702
2020	140	-1.4777	-1.36964	0.577304	0.267782	0.675381	0.57996	0.590354	0.76945	0.734421	0.135128	0.63043	0.508151	-1.14362	-0.515842	-0.0606672	-0.335481	0.568076	0.756063	0.601285	0.507684	0.431623	0.125999	0.79	-0.208796	0.621997	0.79
2020	160	-1.4612	-1.3678	0.577304	0.280455	0.675381	0.587513	0.615291	0.784463	0.751375	0.185288	0.638924	0.519179	-1.14362	-0.515842	-0.0606672	-0.335481	0.580977	0.756063	0.603033	0.507684	0.434046	0.125999	0.79	-0.20065	0.623662	0.79
2020	180	-1.44713	-1.36531	0.577304	0.280455	0.675381	0.587513	0.615291	0.784463	0.751375	0.185288	0.644475	0.526385	-1.14362	-0.515842	-0.0606672	-0.335481	0.580977	0.756063	0.603846	0.507684	0.435173	0.125999	0.79	-0.193999	0.624436	0.79
2020	200	-1.43916	-1.36462	0.577304	0.280455	0.675381	0.587513	0.615291	0.784463	0.751375	0.185288	0.647467	0.530269	-1.14362	-0.515842	-0.0606672	-0.335481	0.580977	0.756063	0.603939	0.507684	0.435302	0.125999	0.79	-0.187952	0.624525	0.79
2020	220	-1.42814	-1.36352	0.577304	0.280455	0.675381	0.587513	0.615291	0.784463	0.751375	0.185288	0.650945	0.534785	-1.14362	-0.515842	-0.0606672	-0.335481	0.580977	0.756063	0.604093	0.507684	0.435516	0.125999	0.79	-0.185443	0.624672	0.79
2020	240	-1.42137	-1.36248	0.577304	0.280455	0.675381	0.587513	0.616188	0.785003	0.751986	0.187094	0.65305	0.537518	-1.14362	-0.515842	-0.0606672	-0.332649	0.580977	0.756063	0.604146	0.507684	0.435589	0.125999	0.79	-0.182915	0.624722	0.79
2020	260	-1.41907	-1.36178	0.577304	0.280671	0.675381	0.587641	0.617984	0.786084	0.753206	0.190706	0.653903	0.538625	-1.14362	-0.515842	-0.0606672	-0.326984	0.580977	0.756063	0.604169	0.507684	0.43562	0.125999	0.79	-0.182044	0.624744	0.79
2020	280	-1.41743	-1.36086	0.577793	0.280671	0.675724	0.587641	0.617984	0.786084	0.753206	0.190706	0.654645	0.539588	-1.14362	-0.515842	-0.0606672	-0.324469	0.580977	0.756063	0.604192	0.507684	0.435653	0.125999	0.79	-0.181167	0.624767	0.79
2020	300	-1.41622	-1.36029	0.578228	0.280671	0.676109	0.587641	0.617984	0.786084	0.753206	0.190706	0.655096	0.540174	-1.14362	-0.515842	-0.0606672	-0.324469	0.587335	0.756063	0.604213	0.507684	0.435682	0.125999	0.79	-0.18065	0.624786	0.79
2020	320	-1.4155	-1.35985	0.579206	0.280671	0.676494	0.587641	0.617984	0.786084	0.753206	0.190706	0.655484	0.540678	-1.14362	-0.515842	-0.0606672	-0.324469	0.587335	0.756063	0.604224	0.507684	0.435697	0.125999	0.79	-0.180179	0.624797	0.79
2020	340	-1.41503	-1.35949	0.579206	0.281172	0.67688	0.58794	0.617984	0.786084	0.753206	0.190706	0.655673	0.540923	-1.14362	-0.515842	-0.0606672	-0.324469	0.587335	0.756063	0.604232	0.507684	0.435709	0.125999	0.79	-0.179917	0.624805	0.79
2020	360	-1.41418	-1.35919	0.579206	0.281172	0.67688	0.58794	0.618928	0.786653	0.753848	0.192606	0.655975	0.541315	-1.14362	-0.515842	-0.0606672	-0.324469	0.587335	0.756063	0.604241	0.507684	0.43572	0.125999	0.79	-0.179684	0.624813	0.79
2020	380	-1.41365	-1.35894	0.579206	0.281479	0.67688	0.588123	0.618928	0.786653	0.753848	0.192606	0.656241	0.54166	-1.13292	-0.515842	-0.0606672	-0.321636	0.587335	0.756063	0.609006	0.507684	0.442327	0.125999	0.79	-0.179374	0.629353	0.79
2020	400	-1.41319	-1.35878	0.579206	0.281687	0.67688	0.588247	0.618928	0.786653	0.753848	0.192606	0.656435	0.541912	-1.13151	-0.515842	-0.0606672	-0.321636	0.587335	0.756063	0.609012	0.507684	0.442336	0.125999	0.79	-0.179118	0.629359	0.79
2020	420	-1.41292	-1.35857	0.579206	0.281687	0.67688	0.588247	0.619546	0.787025	0.754268	0.193848	0.656546	0.542056	-1.12722	-0.515842	-0.0606672	-0.321636	0.587335	0.756063	0.609016	0.507684	0.44234	0.125999	0.79	-0.179012	0.629362	0.79
2020	440	-1.41255	-1.35843	0.579695	0.281768	0.67688	0.588295	0.619546	0.787025	0.754268	0.193848	0.656696	0.542252	-1.12722	-0.515842	-0.0606672	-0.321636	0.612045	0.756063	0.60902	0.507684	0.442347	0.125999	0.79	-0.178885	0.629367	0.79
2020	460	-1.41226	-1.35827	0.579695	0.281768	0.677265	0.588295	0.619546	0.787025	0.754268	0.193848	0.656825	0.542418	-1.12722	-0.515842	-0.0606672	-0.142202	0.612873	0.756063	0.609056	0.507684	0.442396	0.125999	0.79	-0.178802	0.629401	0.79
2020	480	-1.41209	-1.35812	0.579695	0.281768	0.677265	0.588295	0.620937	0.787862	0.755214	0.196646	0.656881	0.542491	-1.12722	-0.515842	-0.0606672	-0.142202	0.612873	0.756063	0.609057	0.507684	0.442398	0.125999	0.79	-0.178723	0.629402	0.79
2020	500	-1.41195	-1.35802	0.641647	0.285423	0.677265	0.590473	0.621633	0.788281	0.755687	0.198045	0.659227	0.545537	-1.12722	-0.494261	-0.0453985	-0.142202	0.612873	0.756063	0.60906	0.507684	0.442403	0.125999	0.79	-0.178595	0.629405	0.79
2020	520	-1.41179	-1.35785	0.641647	0.286057	0.677265	0.590851	0.62203	0.78852	0.755957	0.198845	0.65929	0.545619	-1.12722	-0.494261	-0.0453985	-0.142202	0.612873	0.756063	0.609063	0.507684	0.442406	0.125999	0.79	-0.17851	0.629408	0.79
2020	540	-1.41163	-1.35772	0.641647	0.290711	0.677265	0.593624	0.622169	0.788604	0.756052	0.199124	0.659345	0.54569	-0.8582	-0.450855	-0.0146878	-0.142202	0.616259	0.756063	0.623339	0.507684	0.462198	0.125999	0.79	-0.178426	0.64301	0.79
2020	560	-1.41155	-1.35763	0.641647	0.290711	0.677265	0.593624	0.63212	0.79	0.762817	0.219141	0.659372	0.545725	-0.8582	-0.41579	0.0101215	-0.142202	0.618139	0.79	0.62584	0.575453	0.465666	0.125999	0.79	0.0789504	0.645394	0.79
2020	580	-1.41143	-1.35748	0.641647	0.32019	0.726097	0.611192	0.63219	0.79	0.762865	0.219282	0.659413	0.545778	-0.857309	-0.382186	0.0338967	-0.142202	0.618139	0.79	0.634484	0.575453	0.477649	0.125999	0.79	0.079024	0.65363	0.79
2020	600	-1.17156	-1.3574	0.670341	0.358349	0.748714	0.633933	0.660532	0.79	0.782134	0.276292	0.664738	0.552692	-0.732712	-0.303893	0.0892902	-0.0590948	0.645485	0.79	0.667817	0.606841	0.52386	0.255036	0.79	0.198259	0.68539	0.79
2020	620	-1.17148	-1.35731	0.670341	0.385914	0.748714	0.65036	0.670103	0.79	0.788641	0.295543	0.66903	0.558263	-0.732712	-0.29623	0.0947119	-0.0590948	0.658082	0.79	0.667879	0.60898	0.523947	0.255036	0.79	0.198286	0.685449	0.79
2020	640	-1.17146	-1.35726	0.670341	0.385914	0.748714	0.65036	0.687952	0.79	0.79	0.331448	0.66972	0.55916	-0.732712	-0.29623	0.0947119	-0.0590948	0.66207	0.79	0.66788	0.60898	0.523948	0.255036	0.79	0.198299	0.68545	0.79
2020	660	-1.1714	-1.35721	0.670341	0.387912	0.748714	0.651551	0.695426	0.79	0.79	0.346481	0.66975	0.559198	-0.732712	-0.29623	0.0947119	-0.0590948	0.671348	0.79	0.667881	0.611	0.523949	0.255036	0.79	0.198332	0.685451	0.79
2020	680	-1.17134	-1.35716	0.670341	0.387912	0.748714	0.651551	0.696121	0.79	0.79	0.34788	0.669809	0.559275	-0.732712	-0.29623	0.0947119	-0.0590948	0.671348	0.79	0.668555	0.611	0.524884	0.255036	0.79	0.198358	0.686093	0.79
2020	700	-1.1713	-1.35711	0.670341	0.387912	0.748714	0.651551	0.696121	0.79	0.79	0.34788	0.669824	0.559294	-0.732712	-0.29623	0.0947119	-0.0590948	0.671348	0.79	0.6686	0.611	0.524947	0.255036	0.79	0.198377	0.686137	0.79
2020	720	-1.17123	-1.35704	0.670341	0.387912	0.748714	0.651551	0.696121	0.79	0.79	0.34788	0.670079	0.559626	-0.732712	-0.29623	0.0947119	-0.0590948	0.67192	0.79	0.668602	0.611	0.524949	0.255036	0.79	0.198399	0.686138	0.79
2020	740	-1.1712	-1.357	0.670341	0.387912	0.748714	0.651551	0.696121	0.79	0.79	0.34788	0.670089	0.559639	-0.732712	-0.29623	0.0947119	-0.0590948	0.67192	0.79	0.668602	0.611	0.524949	0.255036	0.79	0.198415	0.686138	0.79
2020	760	-1.11366	-1.35696	0.677225	0.392355	0.751427	0.654199	0.698957	0.79	0.79	0.353585	0.67059	0.560289	-0.717767	-0.282333	0.104544	-0.0391576	0.67675	0.79	0.673219	0.618589	0.53135	0.259935	0.79	0.212724	0.690538	0.79
2020	780	-1.05611	-1.35693	0.684109	0.396797	0.75414	0.656846	0.701794	0.79	0.79	0.35929	0.67109	0.560938	-0.702821	-0.268436	0.114377	-0.0192204	0.681581	0.79	0.677836	0.626178	0.537751	0.264835	0.79	0.227032	0.694937	0.79
2020	800	-0.998563	-1.35689	0.690992	0.40124	0.756853	0.659494	0.70463	0.79	0.79	0.364995	0.67159	0.561588	-0.687876	-0.254539	0.124209	0.00071678	0.686411	0.79	0.682453	0.633768	0.544151	0.269734	0.79	0.241341	0.699336	0.79
2020	820	-0.941016	-1.35685	0.697876	0.405683	0.759566	0.662142	0.707466	0.79	0.79	0.370699	0.672091	0.562238	-0.672931	-0.240642	0.134041	0.020654	0.691242	0.79	0.687069	0.641357	0.550552	0.274634	0.79	0.25565	0.703735	0.79
2020	840	-0.883469	-1.35682	0.70476	0.410125	0.762279	0.664789	0.710302	0.79	0.79	0.376404	0.672591	0.562887	-0.657985	-0.226745	0.143874	0.0405912	0.696072	0.79	0.691686	0.648946	0.556953	0.279533	0.79	0.269958	0.708134	0.79
2020	860	-0.825923	-1.35678	0.711643	0.414568	0.764992	0.667437	0.713138	0.79	0.79	0.382109	0.673092	0.563537	-0.64304	-0.212848	0.153706	0.0605284	0.700903	0.79	0.696303	0.656536	0.563353	0.284433	0.79	0.284267	0.712533	0.79
2020	880	-0.768376	-1.35674	0.718527	0.419011	0.767705	0.670084	0.715974	0.79	0.79	0.387814	0.673592	0.564187	-0.628095	-0.198951	0.163539	0.0804656	0.705733	0.79	0.70092	0.664125	0.569754	0.289332	0.79	0.298576	0.716932	0.79
2020	900	-0.710829	-1.3567	0.725411	0.423453	0.770418	0.672732	0.71881	0.79	0.79	0.393519	0.674093	0.564836	-0.61315	-0.185054	0.173371	0.100403	0.710564	0.79	0.705537	0.671714	0.576155	0.294232	0.79	0.312884	0.721331	0.79
2020	920	-0.653282	-1.35667	0.732294	0.427896	0.773131	0.67538	0.721646	0.79	0.79	0.399223	0.674593	0.565486	-0.598204	-0.171157	0.183203	0.12034	0.715394	0.79	0.710154	0.679304	0.582555	0.299131	0.79	0.327193	0.72573	0.79
2020	940	-0.595736	-1.35663	0.739178	0.432339	0.775843	0.678027	0.724482	0.79	0.79	0.404928	0.675093	0.566136	-0.583259	-0.15726	0.193036	0.140277	0.720224	0.79	0.71477	0.686893	0.588956	0.304031	0.79	0.341502	0.730129	0.79
2020	960	-0.538189	-1.35659	0.746062	0.436781	0.778556	0.680675	0.727318	0.79	0.79	0.410633	0.675594	0.566785	-0.568314	-0.143363	0.202868	0.160214	0.725055	0.79	0.719387	0.694482	0.595357	0.30893	0.79	0.35581	0.734528	0.79
2020	980	-0.480642	-1.35656	0.752945	0.441224	0.781269	0.683322	0.730154	0.79	0.79	0.416338	0.676094	0.567435	-0.553368	-0.129466	0.2127	0.180152	0.729885	0.79	0.724004	0.702072	0.601757	0.31383	0.79	0.370119	0.738927	0.79
2020	1000	-0.423095	-1.35652	0.759829	0.445667	0.783982	0.68597	0.73299	0.79	0.79	0.422042	0.676595	0.568085	-0.538423	-0.115569	0.222533	0.200089	0.734716	0.79	0.728621	0.709661	0.608158	0.318729	0.79	0.384427	0.743326	0.79
2020	1020	-0.365549	-1.35648	0.766713	0.450109	0.786695	0.688617	0.735826	0.79	0.79	0.427747	0.677095	0.568734	-0.523478	-0.101672	0.232365	0.220026	0.739546	0.79	0.733238	0.71725	0.614559	0.323629	0.79	0.398736	0.747726	0.79
2020	1040	-0.308002	-1.35645	0.773596	0.454552	0.789408	0.691265	0.738662	0.79	0.79	0.433452	0.677595	0.569384	-0.508532	-0.0877746	0.242198	0.239963	0.744377	0.79	0.737855	0.72484	0.620959	0.328528	0.79	0.413045	0.752125	0.79
2020	1060	-0.250455	-1.35641	0.78048	0.458995	0.79	0.693913	0.741499	0.79	0.79	0.439157	0.678096	0.570034	-0.493587	-0.0738775	0.25203	0.2599	0.749207	0.79	0.742471	0.732429	0.62736	0.333428	0.79	0.427353	0.756524	0.79
2020	1080	-0.192908	-1.35637	0.787364	0.463437	0.79	0.69656	0.744335	0.79	0.79	0.444862	0.678596	0.570683	-0.478642	-0.0599805	0.261862	0.279838	0.754038	0.79	0.747088	0.740018	0.633761	0.338327	0.79	0.441662	0.760923	0.79
2020	1100	-0.135362	-1.35634	0.79	0.46788	0.79	0.699208	0.747171	0.79	0.79	0.450566	0.679097	0.571333	-0.463697	-0.0460835	0.271695	0.299775	0.758868	0.79	0.751705	0.747608	0.640161	0.343227	0.79	0.455971	0.765322	0.79
2020	1120	-0.135354	-1.35633	0.79	0.471569	0.79	0.701406	0.749942	0.79	0.79	0.456141	0.679589	0.571972	-0.448751	-0.0433033	0.273662	0.299775	0.760359	0.79	0.752112	0.747608	0.640725	0.348126	0.79	0.455975	0.765709	0.79
2020	1140	-0.135346	-1.35631	0.79	0.475258	0.79	0.703605	0.752713	0.79	0.79	0.461715	0.680081	0.572611	-0.433806	-0.0405232	0.275629	0.299775	0.761849	0.79	0.752519	0.747608	0.641289	0.353026	0.79	0.455979	0.766097	0.79
2020	1160	-0.135338	-1.3563	0.79	0.478947	0.79	0.705803	0.755484	0.79	0.79	0.46729	0.680573	0.573249	-0.418861	-0.0377431	0.277596	0.299775	0.76334	0.79	0.752926	0.747608	0.641853	0.357925	0.79	0.455984	0.766485	0.79
2020	1180	-0.13533	-1.35629	0.79	0.482636	0.79	0.708002	0.758256	0.79	0.79	0.472864	0.681065	0.573888	-0.403915	-0.034963	0.279563	0.299775	0.764831	0.79	0.753332	0.747608	0.642417	0.362825	0.79	0.455988	0.766872	0.79
2020	1200	-0.135322	-1.35628	0.79	0.486326	0.79	0.710201	0.761027	0.79	0.79	0.478439	0.681557	0.574527	-0.38897	-0.0321829	0.28153	0.299775	0.766321	0.79	0.753739	0.747608	0.642981	0.367724	0.79	0.455992	0.76726	0.79
2020	1220	-0.135314	-1.35626	0.79	0.490015	0.79	0.712399	0.763798	0.79	0.79	0.484013	0.682049	0.575165	-0.374025	-0.0294027	0.283497	0.299775	0.767812	0.79	0.754146	0.747608	0.643545	0.372624	0.79	0.455997	0.767648	0.79
2020	1240	-0.135306	-1.35625	0.79	0.493704	0.79	0.714598	0.76657	0.79	0.79	0.489588	0.682541	0.575804	-0.359079	-0.0266226	0.285464	0.299775	0.769302	0.79	0.754553	0.747608	0.644109	0.377523	0.79	0.456001	0.768035	0.79
2020	1260	-0.135298	-1.35624	0.79	0.497393	0.79	0.716796	0.769341	0.79	0.79	0.495162	0.683033	0.576443	-0.344134	-0.0238425	0.287431	0.299775	0.770793	0.79	0.75496	0.747608	0.644673	0.382423	0.79	0.456006	0.768423	0.79
2020	1280	-0.135289	-1.35623	0.79	0.501082	0.79	0.718995	0.772112	0.79	0.79	0.500736	0.683525	0.577082	-0.329189	-0.0210624	0.289398	0.299775	0.772284	0.79	0.755367	0.747608	0.645237	0.387322	0.79	0.45601	0.768811	0.79
2020	1300	-0.135281	-1.35622	0.79	0.504771	0.79	0.721193	0.774883	0.79	0.79	0.506311	0.684017	0.57772	-0.314243	-0.0182823	0.291365	0.299775	0.773774	0.79	0.755773	0.747608	0.645801	0.392222	0.79	0.456014	0.769198	0.79
2020	1320	-0.135273	-1.3562	0.79	0.50846	0.79	0.723392	0.777655	0.79	0.79	0.511885	0.684509	0.578359	-0.299298	-0.0155022	0.293332	0.299775	0.775265	0.79	0.75618	0.747608	0.646365	0.397121	0.79	0.456019	0.769586	0.79
2020	1340	-0.135265	-1.35619	0.79	0.51215	0.79	0.72559	0.780426	0.79	0.79	0.51746	0.685001	0.578998	-0.284353	-0.012722	0.295299	0.299775	0.776756	0.79	0.756587	0.747608	0.646929	0.402021	0.79	0.456023	0.769974	0.79
2020	1360	-0.135257	-1.35618	0.79	0.515839	0.79	0.727789	0.783197	0.79	0.79	0.523034	0.685493	0.579637	-0.269408	-0.00994192	0.297266	0.299775	0.778246	0.79	0.756994	0.747608	0.647493	0.40692	0.79	0.456027	0.770361	0.79
2020	1380	-0.135249	-1.35617	0.79	0.519528	0.79	0.729987	0.785969	0.79	0.79	0.528609	0.685985	0.580275	-0.254462	-0.0071618	0.299233	0.299775	0.779737	0.79	0.757401	0.747608	0.648058	0.41182	0.79	0.456032	0.770749	0.79
2020	1400	-0.135241	-1.35616	0.79	0.523217	0.79	0.732186	0.78874	0.79	0.79	0.534183	0.686477	0.580914	-0.239517	-0.00438168	0.3012	0.299775	0.781227	0.79	0.757808	0.747608	0.648622	0.416719	0.79	0.456036	0.771137	0.79
2020	1420	-0.135233	-1.35614	0.79	0.526906	0.79	0.734385	0.79	0.79	0.79	0.539758	0.686969	0.581553	-0.224572	-0.00160156	0.303166	0.299775	0.782718	0.79	0.758214	0.747608	0.649186	0.421619	0.79	0.45604	0.771524	0.79
2020	1440	-0.135225	-1.35613	0.79	0.530595	0.79	0.736583	0.79	0.79	0.79	0.545332	0.687461	0.582192	-0.209626	0.00117855	0.305133	0.299775	0.784209	0.79	0.758621	0.747608	0.64975	0.426518	0.79	0.456045	0.771912	0.79
2020	1460	-0.135217	-1.35612	0.79	0.534285	0.79	0.738782	0.79	0.79	0.79	0.550907	0.687953	0.58283	-0.194681	0.00395867	0.3071	0.299775	0.785699	0.79	0.759028	0.747608	0.650314	0.431418	0.79	0.456049	0.772299	0.79
2020	1480	-0.106532	-1.35611	0.79	0.538034	0.79	0.741016	0.79	0.79	0.79	0.55653	0.688335	0.583327	-0.179777	0.00673109	0.309062	0.299775	0.78895	0.79	0.761419	0.751362	0.653628	0.431418	0.79	0.470307	0.774577	0.79
2020	1500	-0.0778461	-1.35611	0.79	0.541784	0.79	0.743251	0.79	0.79	0.79	0.562154	0.688717	0.583823	-0.164873	0.00950351	0.311024	0.299775	0.79	0.79	0.763809	0.755117	0.656942	0.431418	0.79	0.484566	0.776855	0.79
2020	1520	-0.0491606	-1.3561	0.79	0.545534	0.79	0.745485	0.79	0.79	0.79	0.567778	0.6891	0.58432	-0.149969	0.0122759	0.312985	0.299775	0.79	0.79	0.7662	0.758871	0.660256	0.431418	0.79	0.498824	0.779133	0.79
2020	1540	-0.020475	-1.3561	0.79	0.549283	0.79	0.74772	0.79	0.79	0.79	0.573402	0.689482	0.584816	-0.135065	0.0150483	0.314947	0.299775	0.79	0.79	0.76859	0.762626	0.66357	0.431418	0.79	0.513083	0.78141	0.79
2020	1560	0.00821052	-1.35609	0.79	0.553033	0.79	0.749955	0.79	0.79	0.79	0.579026	0.689865	0.585313	-0.120161	0.0178208	0.316908	0.299775	0.79	0.79	0.770981	0.76638	0.666884	0.431418	0.79	0.527341	0.783688	0.79
2020	1580	0.0368961	-1.35609	0.79	0.556782	0.79	0.752189	0.79	0.79	0.79	0.58465	0.690247	0.585809	-0.105258	0.0205932	0.31887	0.299775	0.79	0.79	0.773371	0.770135	0.670198	0.431418	0.79	0.5416	0.785966	0.79
2020	1600	0.0655816	-1.35608	0.79	0.560532	0.79	0.754424	0.79	0.79	0.79	0.590274	0.690629	0.586305	-0.0903537	0.0233656	0.320831	0.299775	0.79	0.79	0.775762	0.773889	0.673512	0.431418	0.79	0.555858	0.788244	0.79
2020	1620	0.0942671	-1.35608	0.79	0.564282	0.79	0.756658	0.79	0.79	0.79	0.595898	0.691012	0.586802	-0.0754498	0.026138	0.322793	0.299775	0.79	0.79	0.778152	0.777644	0.676826	0.431418	0.79	0.570117	0.79	0.79
2020	1640	0.122953	-1.35607	0.79	0.568031	0.79	0.758893	0.79	0.79	0.79	0.601522	0.691394	0.587298	-0.0605459	0.0289104	0.324754	0.299775	0.79	0.79	0.780543	0.781398	0.680141	0.431418	0.79	0.584375	0.79	0.79
2020	1660	0.151638	-1.35607	0.79	0.571781	0.79	0.761128	0.79	0.79	0.79	0.607146	0.691777	0.587795	-0.045642	0.0316828	0.326716	0.299775	0.79	0.79	0.782933	0.785153	0.683455	0.431418	0.79	0.598634	0.79	0.79
2020	1680	0.180324	-1.35606	0.79	0.575531	0.79	0.763362	0.79	0.79	0.79	0.61277	0.692159	0.588291	-0.0307381	0.0344553	0.328677	0.299775	0.79	0.79	0.785323	0.788907	0.686769	0.431418	0.79	0.612893	0.79	0.79
2020	1700	0.209009	-1.35606	0.79	0.57928	0.79	0.765597	0.79	0.79	0.79	0.618394	0.692541	0.588788	-0.0158342	0.0372277	0.330639	0.299775	0.79	0.79	0.787714	0.79	0.690083	0.431418	0.79	0.627151	0.79	0.79
2020	1720	0.237695	-1.35605	0.79	0.58303	0.79	0.767831	0.79	0.79	0.79	0.624018	0.692924	0.589284	-0.000930258	0.0400001	0.3326	0.299775	0.79	0.79	0.79	0.79	0.693397	0.431418	0.79	0.64141	0.79	0.79
2020	1740	0.26638	-1.35605	0.79	0.58678	0.79	0.770066	0.79	0.79	0.79	0.629642	0.693306	0.589781	0.0139736	0.0427725	0.334562	0.299775	0.79	0.79	0.79	0.79	0.696711	0.431418	0.79	0.655668	0.79	0.79
2020	1760	0.295066	-1.35604	0.79	0.590529	0.79	0.772301	0.79	0.79	0.79	0.635266	0.693689	0.590277	0.0288776	0.0455449	0.336523	0.299775	0.79	0.79	0.79	0.79	0.700025	0.431418	0.79	0.669927	0.79	0.79
2020	1780	0.323751	-1.35604	0.79	0.594279	0.79	0.774535	0.79	0.79	0.79	0.64089	0.694071	0.590774	0.0437815	0.0483174	0.338485	0.299775	0.79	0.79	0.79	0.79	0.703339	0.431418	0.79	0.684185	0.79	0.79
2020	1800	0.352437	-1.35603	0.79	0.598029	0.79	0.77677	0.79	0.79	0.79	0.646514	0.694453	0.59127	0.0586854	0.0510898	0.340446	0.299775	0.79	0.79	0.79	0.79	0.706653	0.431418	0.79	0.698444	0.79	0.79
2020	1820	0.381123	-1.35603	0.79	0.601778	0.79	0.779004	0.79	0.79	0.79	0.652138	0.694836	0.591767	0.0735893	0.0538622	0.342408	0.299775	0.79	0.79	0.79	0.79	0.709968	0.431418	0.79	0.712702	0.79	0.79
2020	1840	0.409808	-1.35602	0.79	0.605528	0.79	0.781239	0.79	0.79	0.79	0.657762	0.695218	0.592263	0.0884932	0.0566346	0.34437	0.299775	0.79	0.79	0.79	0.79	0.713282	0.431418	0.79	0.726961	0.79	0.79
2020	1860	0.40981	-1.35602	0.79	0.605856	0.79	0.781435	0.79	0.79	0.79	0.657762	0.69522	0.592265	0.0884932	0.0624856	0.348509	0.310268	0.79	0.79	0.79	0.79	0.713307	0.436575	0.79	0.726962	0.79	0.79
2020	1880	0.409813	-1.35601	0.79	0.606185	0.79	0.78163	0.79	0.79	0.79	0.657762	0.695221	0.592267	0.0884932	0.0683366	0.352649	0.320761	0.79	0.79	0.79	0.79	0.713332	0.441733	0.79	0.726963	0.79	0.79
2020	1900	0.409815	-1.35601	0.79	0.606513	0.79	0.781826	0.79	0.79	0.79	0.657762	0.695222	0.592269	0.0884932	0.0741876	0.356789	0.331255	0.79	0.79	0.79	0.79	0.713358	0.44689	0.79	0.726964	0.79	0.79
2020	1920	0.409817	-1.356	0.79	0.606841	0.79	0.782021	0.79	0.79	0.79	0.657762	0.695224	0.59227	0.0884932	0.0800386	0.360928	0.341748	0.79	0.79	0.79	0.79	0.713383	0.452047	0.79	0.726966	0.79	0.79
2020	1940	0.409819	-1.356	0.79	0.607169	0.79	0.782217	0.79	0.79	0.79	0.657762	0.695225	0.592272	0.0884932	0.0858897	0.365068	0.352241	0.79	0.79	0.79	0.79	0.713408	0.457205	0.79	0.726967	0.79	0.79
2020	1960	0.409822	-1.35599	0.79	0.607497	0.79	0.782413	0.79	0.79	0.79	0.657762	0.695227	0.592274	0.0884932	0.0917407	0.369208	0.362734	0.79	0.79	0.79	0.79	0.713433	0.462362	0.79	0.726968	0.79	0.79
2020	1980	0.409824	-1.35599	0.79	0.607826	0.79	0.782608	0.79	0.79	0.79	0.657762	0.695228	0.592276	0.0884932	0.0975917	0.373347	0.373228	0.79	0.79	0.79	0.79	0.713459	0.467519	0.79	0.726969	0.79	0.79
2020	2000	0.409826	-1.35598	0.79	0.608154	0.79	0.782804	0.79	0.79	0.79	0.657762	0.695229	0.592278	0.0884932	0.103443	0.377487	0.383721	0.79	0.79	0.79	0.79	0.713484	0.472677	0.79	0.726971	0.79	0.79
2020	2020	0.409829	-1.35598	0.79	0.608482	0.79	0.783	0.79	0.79	0.79	0.657762	0.695231	0.592279	0.0884932	0.109294	0.381627	0.394214	0.79	0.79	0.79	0.79	0.713509	0.477834	0.79	0.726972	0.79	0.79
2020	2040	0.409831	-1.35598	0.79	0.60881	0.79	0.783195	0.79	0.79	0.79	0.657762	0.695232	0.592281	0.0884932	0.115145	0.385766	0.404708	0.79	0.79	0.79	0.79	0.713535	0.482992	0.79	0.726973	0.79	0.79
2020	2060	0.409833	-1.35597	0.79	0.609139	0.79	0.783391	0.79	0.79	0.79	0.657762	0.695234	0.592283	0.0884932	0.120996	0.389906	0.415201	0.79	0.79	0.79	0.79	0.71356	0.488149	0.79	0.726975	0.79	0.79
2020	2080	0.409835	-1.35597	0.79	0.609467	0.79	0.783586	0.79	0.79	0.79	0.657762	0.695235	0.592285	0.0884932	0.126847	0.394046	0.425694	0.79	0.79	0.79	0.79	0.713585	0.493306	0.79	0.726976	0.79	0.79
2020	2100	0.409838	-1.35596	0.79	0.609795	0.79	0.783782	0.79	0.79	0.79	0.657762	0.695236	0.592287	0.0884932	0.132698	0.398185	0.436187	0.79	0.79	0.79	0.79	0.713611	0.498464	0.79	0.726977	0.79	0.79
2020	2120	0.40984	-1.35596	0.79	0.610123	0.79	0.783978	0.79	0.79	0.79	0.657762	0.695238	0.592288	0.0884932	0.138549	0.402325	0.446681	0.79	0.79	0.79	0.79	0.713636	0.503621	0.79	0.726978	0.79	0.79
2020	2140	0.409842	-1.35595	0.79	0.610452	0.79	0.784173	0.79	0.79	0.79	0.657762	0.695239	0.59229	0.0884932	0.1444	0.406465	0.457174	0.79	0.79	0.79	0.79	0.713661	0.508778	0.79	0.72698	0.79	0.79
2020	2160	0.409844	-1.35595	0.79	0.61078	0.79	0.784369	0.79	0.79	0.79	0.657762	0.695241	0.592292	0.0884932	0.150251	0.410605	0.467667	0.79	0.79	0.79	0.79	0.713687	0.513936	0.79	0.726981	0.79	0.79
2020	2180	0.409847	-1.35594	0.79	0.611108	0.79	0.784564	0.79	0.79	0.79	0.657762	0.695242	0.592294	0.0884932	0.156102	0.414744	0.47816	0.79	0.79	0.79	0.79	0.713712	0.519093	0.79	0.726982	0.79	0.79
2020	2200	0.409849	-1.35594	0.79	0.611436	0.79	0.78476	0.79	0.79	0.79	0.657762	0.695243	0.592296	0.0884932	0.161953	0.418884	0.488654	0.79	0.79	0.79	0.79	0.713737	0.524251	0.79	0.726983	0.79	0.79
2020	2220	0.409851	-1.35594	0.79	0.611436	0.79	0.78476	0.79	0.79	0.79	0.657762	0.695244	0.592297	0.0884932	0.161953	0.418884	0.488654	0.79	0.79	0.79	0.79	0.713737	0.524251	0.79	0.726984	0.79	0.79
2020	2240	0.409853	-1.35593	0.79	0.611436	0.79	0.78476	0.79	0.79	0.79	0.657762	0.695245	0.592298	0.0884932	0.161953	0.418884	0.488654	0.79	0.79	0.79	0.79	0.713737	0.524251	0.79	0.726985	0.79	0.79
2020	2260	0.409855	-1.35593	0.79	0.611436	0.79	0.78476	0.79	0.79	0.79	0.657762	0.695246	0.592299	0.0884932	0.161953	0.418884	0.488654	0.79	0.79	0.79	0.79	0.713737	0.524251	0.79	0.726986	0.79	0.79
2020	2280	0.409857	-1.35592	0.79	0.611436	0.79	0.78476	0.79	0.79	0.79	0.657762	0.695247	0.5923	0.0884932	0.161953	0.418884	0.488654	0.79	0.79	0.79	0.79	0.713737	0.524251	0.79	0.726987	0.79	0.79
2020	2300	0.409859	-1.35592	0.79	0.611436	0.79	0.78476	0.79	0.79	0.79	0.657762	0.695247	0.592301	0.0884932	0.161953	0.418884	0.488654	0.79	0.79	0.79	0.79	0.713737	0.524251	0.79	0.726988	0.79	0.79
2020	2320	0.409861	-1.35591	0.79	0.611436	0.79	0.78476	0.79	0.79	0.79	0.657762	0.695248	0.592302	0.0884932	0.161953	0.418884	0.488654	0.79	0.79	0.79	0.79	0.713737	0.524251	0.79	0.726989	0.79	0.79
2020	2340	0.409863	-1.35591	0.79	0.611436	0.79	0.78476	0.79	0.79	0.79	0.657762	0.695249	0.592303	0.0884932	0.161953	0.418884	0.488654	0.79	0.79	0.79	0.79	0.713737	0.524251	0.79	0.726989	0.79	0.79
2020	2360	0.409865	-1.3559	0.79	0.611436	0.79	0.78476	0.79	0.79	0.79	0.657762	0.69525	0.592304	0.0884932	0.161953	0.418884	0.488654	0.79	0.79	0.79	0.79	0.713738	0.524251	0.79	0.72699	0.79	0.79
2020	2380	0.409867	-1.3559	0.79	0.611436	0.79	0.78476	0.79	0.79	0.79	0.657762	0.695251	0.592305	0.0884932	0.161953	0.418884	0.488654	0.79	0.79	0.79	0.79	0.713738	0.524251	0.79	0.726991	0.79	0.79
2020	2400	0.409869	-1.35589	0.79	0.611436	0.79	0.78476	0.79	0.79	0.79	0.657762	0.695251	0.592306	0.0884932	0.161953	0.418884	0.488654	0.79	0.79	0.79	0.79	0.713738	0.524251	0.79	0.726992	0.79	0.79
2020	2420	0.409871	-1.35589	0.79	0.611436	0.79	0.78476	0.79	0.79	0.79	0.657762	0.695252	0.592307	0.0884932	0.161953	0.418884	0.488654	0.79	0.79	0.79	0.79	0.713738	0.524251	0.79	0.726993	0.79	0.79
2020	2440	0.409873	-1.35588	0.79	0.611436	0.79	0.78476	0.79	0.79	0.79	0.657762	0.695253	0.592308	0.0884932	0.161953	0.418884	0.488654	0.79	0.79	0.79	0.79	0.713738	0.524251	0.79	0.726994	0.79	0.79
2020	2460	0.409875	-1.35588	0.79	0.611436	0.79	0.78476	0.79	0.79	0.79	0.657762	0.695254	0.592309	0.0884932	0.161953	0.418884	0.488654	0.79	0.79	0.79	0.79	0.713738	0.524251	0.79	0.726995	0.79	0.79
2020	2480	0.409877	-1.35587	0.79	0.611436	0.79	0.78476	0.79	0.79	0.79	0.657762	0.695255	0.59231	0.0884932	0.161953	0.418884	0.488654	0.79	0.79	0.79	0.79	0.713738	0.524251	0.79	0.726995	0.79	0.79
2020	2500	0.409879	-1.35587	0.79	0.611436	0.79	0.78476	0.79	0.79	0.79	0.657762	0.695255	0.592311	0.0884932	0.161953	0.418884	0.488654	0.79	0.79	0.79	0.79	0.713738	0.524251	0.79	0.726996	0.79	0.79
2020	2520	0.409881	-1.35586	0.79	0.611436	0.79	0.78476	0.79	0.79	0.79	0.657762	0.695256	0.592312	0.0884932	0.161953	0.418884	0.488654	0.79	0.79	0.79	0.79	0.713738	0.524251	0.79	0.726997	0.79	0.79
2020	2540	0.409883	-1.35586	0.79	0.611436	0.79	0.78476	0.79	0.79	0.79	0.657762	0.695257	0.592313	0.0884932	0.161953	0.418884	0.488654	0.79	0.79	0.79	0.79	0.713738	0.524251	0.79	0.726998	0.79	0.79
2020	2560	0.409885	-1.35586	0.79	0.611436	0.79	0.78476	0.79	0.79	0.79	0.657762	0.695258	0.592314	0.0884932	0.161953	0.418884	0.488654	0.79	0.79	0.79	0.79	0.713738	0.524251	0.79	0.726999	0.79	0.79
2020	2580	0.409885	-1.35585	0.79	0.611436	0.79	0.78476	0.79	0.79	0.79	0.657762	0.695258	0.592315	0.0884932	0.161953	0.418884	0.488654	0.79	0.79	0.79	0.79	0.713738	0.524251	0.79	0.726999	0.79	0.79
2020	2600	0.409886	-1.35585	0.79	0.611436	0.79	0.78476	0.79	0.79	0.79	0.657762	0.695259	0.592315	0.0884932	0.161953	0.418884	0.488654	0.79	0.79	0.79	0.79	0.713738	0.524251	0.79	0.726999	0.79	0.79
2020	2620	0.409887	-1.35585	0.79	0.611436	0.79	0.78476	0.79	0.79	0.79	0.657762	0.695259	0.592316	0.0884932	0.161953	0.418884	0.488654	0.79	0.79	0.79	0.79	0.713738	0.524251	0.79	0.727	0.79	0.79
2020	2640	0.409887	-1.35585	0.79	0.611436	0.79	0.78476	0.79	0.79	0.79	0.657762	0.695259	0.592317	0.0884932	0.161953	0.418884	0.488654	0.79	0.79	0.79	0.79	0.713738	0.524251	0.79	0.727	0.79	0.79
2020	2660	0.409888	-1.35585	0.79	0.611436	0.79	0.78476	0.79	0.79	0.79	0.657762	0.69526	0.592317	0.0884932	0.161953	0.418884	0.488654	0.79	0.79	0.79	0.79	0.713738	0.524251	0.79	0.727	0.79	0.79
2020	2680	0.409888	-1.35585	0.79	0.611436	0.79	0.78476	0.79	0.79	0.79	0.657762	0.69526	0.592318	0.0884932	0.161953	0.418884	0.488654	0.79	0.79	0.79	0.79	0.713738	0.524251	0.79	0.727001	0.79	0.79
2020	2700	0.409889	-1.35585	0.79	0.611436	0.79	0.78476	0.79	0.79	0.79	0.657762	0.695261	0.592318	0.0884932	0.161953	0.418884	0.488654	0.79	0.79	0.79	0.79	0.713738	0.524251	0.79	0.727001	0.79	0.79
2020	2720	0.40989	-1.35585	0.79	0.611436	0.79	0.78476	0.79	0.79	0.79	0.657762	0.695261	0.592319	0.0884932	0.161953	0.418884	0.488654	0.79	0.79	0.79	0.79	0.713738	0.524251	0.79	0.727001	0.79	0.79
2020	2740	0.40989	-1.35585	0.79	0.611436	0.79	0.78476	0.79	0.79	0.79	0.657762	0.695262	0.592319	0.0884932	0.161953	0.418884	0.488654	0.79	0.79	0.79	0.79	0.713738	0.524251	0.79	0.727002	0.79	0.79
2020	2760	0.409891	-1.35584	0.79	0.611436	0.79	0.78476	0.79	0.79	0.79	0.657762	0.695262	0.59232	0.0884932	0.161953	0.418884	0.488654	0.79	0.79	0.79	0.79	0.713738	0.524251	0.79	0.727002	0.79	0.79
2020	2780	0.409892	-1.35584	0.79	0.611436	0.79	0.78476	0.79	0.79	0.79	0.657762	0.695262	0.59232	0.0884932	0.161953	0.418884	0.488654	0.79	0.79	0.79	0.79	0.713738	0.524251	0.79	0.727002	0.79	0.79
2020	2800	0.409892	-1.35584	0.79	0.611436	0.79	0.78476	0.79	0.79	0.79	0.657762	0.695263	0.592321	0.0884932	0.161953	0.418884	0.488654	0.79	0.79	0.79	0.79	0.713738	0.524251	0.79	0.727003	0.79	0.79
2020	2820	0.409893	-1.35584	0.79	0.611436	0.79	0.78476	0.79	0.79	0.79	0.657762	0.695263	0.592321	0.0884932	0.161953	0.418884	0.488654	0.79	0.79	0.79	0.79	0.713738	0.524251	0.79	0.727003	0.79	0.79
2020	2840	0.409894	-1.35584	0.79	0.611436	0.79	0.78476	0.79	0.79	0.79	0.657762	0.695264	0.592322	0.0884932	0.161953	0.418884	0.488654	0.79	0.79	0.79	0.79	0.713738	0.524251	0.79	0.727003	0.79	0.79
2020	2860	0.409894	-1.35584	0.79	0.611436	0.79	0.78476	0.79	0.79	0.79	0.657762	0.695264	0.592322	0.0884932	0.161953	0.418884	0.488654	0.79	0.79	0.79	0.79	0.713738	0.524251	0.79	0.727004	0.79	0.79
2020	2880	0.409895	-1.35584	0.79	0.611436	0.79	0.78476	0.79	0.79	0.79	0.657762	0.695264	0.592323	0.0884932	0.161953	0.418884	0.488654	0.79	0.79	0.79	0.79	0.713738	0.524251	0.79	0.727004	0.79	0.79
2020	2900	0.409896	-1.35584	0.79	0.611436	0.79	0.78476	0.79	0.79	0.79	0.657762	0.695265	0.592323	0.0884932	0.161953	0.418884	0.488654	0.79	0.79	0.79	0.79	0.713738	0.524251	0.79	0.727004	0.79	0.79
2020	2920	0.409896	-1.35584	0.79	0.611436	0.79	0.78476	0.79	0.79	0.79	0.657762	0.695265	0.592324	0.0884932	0.161953	0.418884	0.488654	0.79	0.79	0.79	0.79	0.713738	0.524251	0.79	0.727005	0.79	0.79
2020	2940	0.409897	-1.35583	0.79	0.611436	0.79	0.78476	0.79	0.79	0.79	0.657762	0.695266	0.592324	0.0884932	0.161953	0.418884	0.488654	0.79	0.79	0.79	0.79	0.713738	0.524251	0.79	0.727005	0.79	0.79
2020	2960	0.409897	-1.35583	0.79	0.611436	0.79	0.78476	0.79	0.79	0.79	0.657762	0.695266	0.592325	0.0884932	0.161953	0.418884	0.488654	0.79	0.79	0.79	0.79	0.713738	0.524251	0.79	0.727005	0.79	0.79
2020	2980	0.409898	-1.35583	0.79	0.611436	0.79	0.78476	0.79	0.79	0.79	0.657762	0.695266	0.592325	0.0884932	0.161953	0.418884	0.488654	0.79	0.79	0.79	0.79	0.713738	0.524251	0.79	0.727006	0.79	0.79
2020	3000	0.409899	-1.35583	0.79	0.611436	0.79	0.78476	0.79	0.79	0.79	0.657762	0.695266	0.592326	0.0884932	0.161953	0.418884	0.488654	0.79	0.79	0.79	0.79	0.713738	0.524251	0.79	0.727006	0.79	0.79
2020	3020	0.409899	-1.35583	0.79	0.611436	0.79	0.78476	0.79	0.79	0.79	0.657762	0.695267	0.592326	0.0884932	0.161953	0.418884	0.488654	0.79	0.79	0.79	0.79	0.713738	0.524251	0.79	0.727006	0.79	0.79
2020	3040	0.4099	-1.35583	0.79	0.611436	0.79	0.78476	0.79	0.79	0.79	0.657762	0.695267	0.592326	0.0884932	0.161953	0.418884	0.488654	0.79	0.79	0.79	0.79	0.713738	0.524251	0.79	0.727006	0.79	0.79
2020	3060	0.409901	-1.35583	0.79	0.611436	0.79	0.78476	0.79	0.79	0.79	0.657762	0.695267	0.592327	0.0884932	0.161953	0.418884	0.488654	0.79	0.79	0.79	0.79	0.713738	0.524251	0.79	0.727006	0.79	0.79
2020	3080	0.409901	-1.35583	0.79	0.611436	0.79	0.78476	0.79	0.79	0.79	0.657762	0.695268	0.592327	0.0884932	0.161953	0.418884	0.488654	0.79	0.79	0.79	0.79	0.713739	0.524251	0.79	0.727007	0.79	0.79
2020	3100	0.409902	-1.35583	0.79	0.611436	0.79	0.78476	0.79	0.79	0.79	0.657762	0.695268	0.592327	0.0884932	0.161953	0.418884	0.488654	0.79	0.79	0.79	0.79	0.713739	0.524251	0.79	0.727007	0.79	0.79
2020	3120	0.409903	-1.35583	0.79	0.611436	0.79	0.78476	0.79	0.79	0.79	0.657762	0.695268	0.592328	0.0884932	0.161953	0.418884	0.488654	0.79	0.79	0.79	0.79	0.713739	0.524251	0.79	0.727007	0.79	0.79
2020	3140	0.409903	-1.35582	0.79	0.611436	0.79	0.78476	0.79	0.79	0.79	0.657762	0.695268	0.592328	0.0884932	0.161953	0.418884	0.488654	0.79	0.79	0.79	0.79	0.713739	0.524251	0.79	0.727007	0.79	0.79
2020	3160	0.409904	-1.35582	0.79	0.611436	0.79	0.78476	0.79	0.79	0.79	0.657762	0.695269	0.592328	0.0884932	0.161953	0.418884	0.488654	0.79	0.79	0.79	0.79	0.713739	0.524251	0.79	0.727007	0.79	0.79
2020	3180	0.409905	-1.35582	0.79	0.611436	0.79	0.78476	0.79	0.79	0.79	0.657762	0.695269	0.592329	0.0884932	0.161953	0.418884	0.488654	0.79	0.79	0.79	0.79	0.713739	0.524251	0.79	0.727008	0.79	0.79
2020	3200	0.409905	-1.35582	0.79	0.611436	0.79	0.78476	0.79	0.79	0.79	0.657762	0.695269	0.592329	0.0884932	0.161953	0.418884	0.488654	0.79	0.79	0.79	0.79	0.713739	0.524251	0.79	0.727008	0.79	0.79
2020	3220	0.409906	-1.35582	0.79	0.611436	0.79	0.78476	0.79	0.79	0.79	0.657762	0.69527	0.59233	0.0884932	0.161953	0.418884	0.488654	0.79	0.79	0.79	0.79	0.713739	0.524251	0.79	0.727008	0.79	0.79
2020	3240	0.409907	-1.35582	0.79	0.611436	0.79	0.78476	0.79	0.79	0.79	0.657762	0.69527	0.59233	0.0884932	0.161953	0.418884	0.488654	0.79	0.79	0.79	0.79	0.713739	0.524251	0.79	0.727008	0.79	0.79
2020	3260	0.409907	-1.35582	0.79	0.611436	0.79	0.78476	0.79	0.79	0.79	0.657762	0.69527	0.59233	0.0884932	0.161953	0.418884	0.488654	0.79	0.79	0.79	0.79	0.713739	0.524251	0.79	0.727009	0.79	0.79
2020	3280	0.409908	-1.35582	0.79	0.611436	0.79	0.78476	0.79	0.79	0.79	0.657762	0.69527	0.592331	0.0884932	0.161953	0.418884	0.488654	0.79	0.79	0.79	0.79	0.713739	0.524251	0.79	0.727009	0.79	0.79
2020	3300	0.409909	-1.35582	0.79	0.611436	0.79	0.78476	0.79	0.79	0.79	0.657762	0.695271	0.592331	0.0884932	0.161953	0.418884	0.488654	0.79	0.79	0.79	0.79	0.713739	0.524251	0.79	0.727009	0.79	0.79
2020	3320	0.409909	-1.35582	0.79	0.611436	0.79	0.78476	0.79	0.79	0.79	0.657762	0.695271	0.592331	0.0884932	0.161953	0.418884	0.488654	0.79	0.79	0.79	0.79	0.713739	0.524251	0.79	0.727009	0.79	0.79
2020	3340	0.409909	-1.35582	0.79	0.611436	0.79	0.78476	0.79	0.79	0.79	0.657762	0.695271	0.592331	0.0884932	0.161953	0.418884	0.488654	0.79	0.79	0.79	0.79	0.713739	0.524251	0.79	0.727009	0.79	0.79
2020	3360	0.409909	-1.35582	0.79	0.611436	0.79	0.78476	0.79	0.79	0.79	0.657762	0.695271	0.592331	0.0884932	0.161953	0.418884	0.488654	0.79	0.79	0.79	0.79	0.713739	0.524251	0.79	0.72701	0.79	0.79
2020	3380	0.409909	-1.35582	0.79	0.611436	0.79	0.78476	0.79	0.79	0.79	0.657762	0.695271	0.592332	0.0884932	0.161953	0.418884	0.488654	0.79	0.79	0.79	0.79	0.713739	0.524251	0.79	0.72701	0.79	0.79
2020	3400	0.40991	-1.35582	0.79	0.611436	0.79	0.78476	0.79	0.79	0.79	0.657762	0.695271	0.592332	0.0884932	0.161953	0.418884	0.488654	0.79	0.79	0.79	0.79	0.713739	0.524251	0.79	0.72701	0.79	0.79
2020	3420	0.40991	-1.35582	0.79	0.611436	0.79	0.78476	0.79	0.79	0.79	0.657762	0.695271	0.592332	0.0884932	0.161953	0.418884	0.488654	0.79	0.79	0.79	0.79	0.713739	0.524251	0.79	0.72701	0.79	0.79
2020	3440	0.40991	-1.35582	0.79	0.611436	0.79	0.78476	0.79	0.79	0.79	0.657762	0.695271	0.592332	0.0884932	0.161953	0.418884	0.488654	0.79	0.79	0.79	0.79	0.713739	0.524251	0.79	0.72701	0.79	0.79
2020	3460	0.40991	-1.35582	0.79	0.611436	0.79	0.78476	0.79	0.79	0.79	0.657762	0.695271	0.592332	0.0884932	0.161953	0.418884	0.488654	0.79	0.79	0.79	0.79	0.713739	0.524251	0.79	0.72701	0.79	0.79
2020	3480	0.40991	-1.35582	0.79	0.611436	0.79	0.78476	0.79	0.79	0.79	0.657762	0.695272	0.592332	0.0884932	0.161953	0.418884	0.488654	0.79	0.79	0.79	0.79	0.713739	0.524251	0.79	0.727011	0.79	0.79
2020	3500	0.40991	-1.35582	0.79	0.611436	0.79	0.78476	0.79	0.79	0.79	0.657762	0.695272	0.592332	0.0884932	0.161953	0.418884	0.488654	0.79	0.79	0.79	0.79	0.713739	0.524251	0.79	0.727011	0.79	0.79
2020	3520	0.409911	-1.35582	0.79	0.611436	0.79	0.78476	0.79	0.79	0.79	0.657762	0.695272	0.592332	0.0884932	0.161953	0.418884	0.488654	0.79	0.79	0.79	0.79	0.713739	0.524251	0.79	0.727011	0.79	0.79
2020	3540	0.409911	-1.35581	0.79	0.611436	0.79	0.78476	0.79	0.79	0.79	0.657762	0.695272	0.592333	0.0884932	0.161953	0.418884	0.488654	0.79	0.79	0.79	0.79	0.713739	0.524251	0.79	0.727011	0.79	0.79
2020	3560	0.409911	-1.35581	0.79	0.611436	0.79	0.78476	0.79	0.79	0.79	0.657762	0.695272	0.592333	0.0884932	0.161953	0.418884	0.488654	0.79	0.79	0.79	0.79	0.713739	0.524251	0.79	0.727011	0.79	0.79
2020	3580	0.409911	-1.35581	0.79	0.611436	0.79	0.78476	0.79	0.79	0.79	0.657762	0.695272	0.592333	0.0884932	0.161953	0.418884	0.488654	0.79	0.79	0.79	0.79	0.713739	0.524251	0.79	0.727011	0.79	0.79
2020	3600	0.409911	-1.35581	0.79	0.611436	0.79	0.78476	0.79	0.79	0.79	0.657762	0.695272	0.592333	0.0884932	0.161953	0.418884	0.488654	0.79	0.79	0.79	0.79	0.713739	0.524251	0.79	0.727012	0.79	0.79
2020	3620	0.409912	-1.35581	0.79	0.611436	0.79	0.78476	0.79	0.79	0.79	0.657762	0.695272	0.592333	0.0884932	0.161953	0.418884	0.488654	0.79	0.79	0.79	0.79	0.713739	0.524251	0.79	0.727012	0.79	0.79
2020	3640	0.409912	-1.35581	0.79	0.611436	0.79	0.78476	0.79	0.79	0.79	0.657762	0.695272	0.592333	0.0884932	0.161953	0.418884	0.488654	0.79	0.79	0.79	0.79	0.713739	0.524251	0.79	0.727012	0.79	0.79
2020	3660	0.409912	-1.35581	0.79	0.611436	0.79	0.78476	0.79	0.79	0.79	0.657762	0.695272	0.592333	0.0884932	0.161953	0.418884	0.488654	0.79	0.79	0.79	0.79	0.713739	0.524251	0.79	0.727012	0.79	0.79
2020	3680	0.409912	-1.35581	0.79	0.611436	0.79	0.78476	0.79	0.79	0.79	0.657762	0.695273	0.592333	0.0884932	0.161953	0.418884	0.488654	0.79	0.79	0.79	0.79	0.713739	0.524251	0.79	0.727012	0.79	0.79
2020	3700	0.409913	-1.35581	0.79	0.611436	0.79	0.78476	0.79	0.79	0.79	0.657762	0.695273	0.592334	0.0884932	0.161953	0.418884	0.488654	0.79	0.79	0.79	0.79	0.713739	0.524251	0.79	0.727013	0.79	0.79
2020	3720	0.409913	-1.35581	0.79	0.611436	0.79	0.78476	0.79	0.79	0.79	0.657762	0.695273	0.592334	0.0884932	0.161953	0.418884	0.488654	0.79	0.79	0.79	0.79	0.713739	0.524251	0.79	0.727013	0.79	0.79
2020	3740	0.409913	-1.35581	0.79	0.611436	0.79	0.78476	0.79	0.79	0.79	0.657762	0.695273	0.592334	0.0884932	0.161953	0.418884	0.488654	0.79	0.79	0.79	0.79	0.713739	0.524251	0.79	0.727013	0.79	0.79
2020	3760	0.409913	-1.35581	0.79	0.611436	0.79	0.78476	0.79	0.79	0.79	0.657762	0.695273	0.592334	0.0884932	0.161953	0.418884	0.488654	0.79	0.79	0.79	0.79	0.713739	0.524251	0.79	0.727013	0.79	0.79
2020	3780	0.409914	-1.35581	0.79	0.611436	0.79	0.78476	0.79	0.79	0.79	0.657762	0.695274	0.592335	0.0884932	0.161953	0.418884	0.488654	0.79	0.79	0.79	0.79	0.713739	0.524251	0.79	0.727014	0.79	0.79
2020	3800	0.409914	-1.35581	0.79	0.611436	0.79	0.78476	0.79	0.79	0.79	0.657762	0.695274	0.592335	0.0884932	0.161953	0.418884	0.488654	0.79	0.79	0.79	0.79	0.713739	0.524251	0.79	0.727014	0.79	0.79
2020	3820	0.409914	-1.35581	0.79	0.611436	0.79	0.78476	0.79	0.79	0.79	0.657762	0.695274	0.592335	0.0884932	0.161953	0.418884	0.488654	0.79	0.79	0.79	0.79	0.713739	0.524251	0.79	0.727014	0.79	0.79
2020	3840	0.409915	-1.35581	0.79	0.611436	0.79	0.78476	0.79	0.79	0.79	0.657762	0.695274	0.592335	0.0884932	0.161953	0.418884	0.488654	0.79	0.79	0.79	0.79	0.713739	0.524251	0.79	0.727014	0.79	0.79
2020	3860	0.409915	-1.35581	0.79	0.611436	0.79	0.78476	0.79	0.79	0.79	0.657762	0.695274	0.592336	0.0884932	0.161953	0.418884	0.488654	0.79	0.79	0.79	0.79	0.713739	0.524251	0.79	0.727014	0.79	0.79
2020	3880	0.409915	-1.35581	0.79	0.611436	0.79	0.78476	0.79	0.79	0.79	0.657762	0.695274	0.592336	0.0884932	0.161953	0.418884	0.488654	0.79	0.79	0.79	0.79	0.713739	0.524251	0.79	0.727015	0.79	0.79
2020	3900	0.409916	-1.35581	0.79	0.611436	0.79	0.78476	0.79	0.79	0.79	0.657762	0.695275	0.592336	0.0884932	0.161953	0.418884	0.488654	0.79	0.79	0.79	0.79	0.713739	0.524251	0.79	0.727015	0.79	0.79
2020	3920	0.409916	-1.35581	0.79	0.611436	0.79	0.78476	0.79	0.79	0.79	0.657762	0.695275	0.592337	0.0884932	0.161953	0.418884	0.488654	0.79	0.79	0.79	0.79	0.713739	0.524251	0.79	0.727015	0.79	0.79
2020	3940	0.409916	-1.35581	0.79	0.611436	0.79	0.78476	0.79	0.79	0.79	0.657762	0.695275	0.592337	0.0884932	0.161953	0.418884	0.488654	0.79	0.79	0.79	0.79	0.713739	0.524251	0.79	0.727015	0.79	0.79
2020	3960	0.409917	-1.35581	0.79	0.611436	0.79	0.78476	0.79	0.79	0.79	0.657762	0.695275	0.592337	0.0884932	0.161953	0.418884	0.488654	0.79	0.79	0.79	0.79	0.713739	0.524251	0.79	0.727016	0.79	0.79
2020	3980	0.409917	-1.35581	0.79	0.611436	0.79	0.78476	0.79	0.79	0.79	0.657762	0.695275	0.592337	0.0884932	0.161953	0.418884	0.488654	0.79	0.79	0.79	0.79	0.713739	0.524251	0.79	0.727016	0.79	0.79
2020	4000	0.409917	-1.35581	0.79	0.611436	0.79	0.78476	0.79	0.79	0.79	0.657762	0.695276	0.592338	0.0884932	0.161953	0.418884	0.488654	0.79	0.79	0.79	0.79	0.713739	0.524251	0.79	0.727016	0.79	0.79
2050	0	-1.94448	-0.786873	0.515352	0.207161	0.626549	0.543833	0.484361	0.705637	0.662358	-0.039039	-0.00504357	-0.161705	-0.706316	-0.332968	-0.0834307	-0.499746	0.422226	0.634254	0.541453	0.27947	0.348674	0.0378075	0.79	-0.498256	0.564987	0.73108
2050	20	-1.60772	-0.746597	0.611409	0.246031	0.708275	0.645352	0.579968	0.749169	0.727705	-0.0177764	0.137964	-0.0629223	-0.689568	-0.31622	-0.0666827	-0.38234	0.598358	0.71783	0.651064	0.356913	0.425709	0.0448546	0.79	-0.363638	0.678575	0.761789
2050	40	-1.34141	-0.695018	0.611409	0.246031	0.708275	0.645352	0.587956	0.751196	0.729994	0.00574347	0.408799	0.162575	-0.67282	-0.299472	-0.0499348	-0.294777	0.623238	0.71783	0.655703	0.356913	0.43214	0.0523997	0.79	-0.225641	0.682845	0.763661
2050	60	-1.14726	-0.650881	0.611409	0.246989	0.708275	0.645924	0.614847	0.75802	0.737699	0.0452884	0.572162	0.374664	-0.656072	-0.282724	-0.0331868	-0.207214	0.630781	0.726395	0.658997	0.39499	0.436707	0.0691477	0.79	-0.131031	0.684168	0.769966
2050	80	-1.02208	-0.625655	0.611409	0.247331	0.708275	0.646128	0.658898	0.769197	0.750321	0.0993802	0.66211	0.491439	-0.639324	-0.265976	-0.0164388	-0.100749	0.630781	0.745667	0.666477	0.480662	0.447076	0.0858957	0.79	-0.0699521	0.687171	0.780294
2050	100	-0.953543	-0.604856	0.683652	0.252421	0.708275	0.649161	0.663024	0.770244	0.751504	0.119626	0.692744	0.549047	-0.622576	-0.216735	0.0232989	-0.0840008	0.657213	0.748522	0.667547	0.493354	0.44856	0.102644	0.79	-0.0348135	0.687601	0.781261
2050	120	-0.658564	-0.586347	0.683652	0.253948	0.708275	0.650071	0.682602	0.775211	0.757113	0.152971	0.700299	0.57232	-0.471321	-0.182454	0.0524515	-0.0672528	0.657213	0.773031	0.685262	0.602312	0.477928	0.119392	0.79	-0.0100318	0.696108	0.785851
2050	140	-0.621614	-0.567582	0.683652	0.317695	0.732691	0.68498	0.690177	0.779725	0.762211	0.1848	0.710215	0.602867	-0.454573	-0.140685	0.0869023	-0.0505048	0.673961	0.773031	0.695643	0.602312	0.512075	0.180235	0.79	0.012838	0.705998	0.79
2050	160	-0.596614	-0.549915	0.683652	0.33273	0.732691	0.688756	0.702645	0.787231	0.770688	0.226628	0.714462	0.61595	-0.437825	-0.123937	0.10365	-0.0337568	0.685489	0.773031	0.696516	0.602312	0.514949	0.196983	0.79	0.0336588	0.706831	0.79
2050	180	-0.572835	-0.531924	0.683652	0.33273	0.732691	0.688756	0.702645	0.787231	0.770688	0.243376	0.717238	0.6245	-0.421077	-0.107189	0.120398	-0.0170088	0.685489	0.773031	0.696923	0.602312	0.516286	0.213731	0.79	0.0537321	0.707218	0.79
2050	200	-0.552099	-0.514829	0.683652	0.33273	0.732691	0.688756	0.702645	0.787231	0.770688	0.260124	0.718734	0.629108	-0.404329	-0.0904411	0.137146	-0.000260826	0.685489	0.773031	0.69697	0.602312	0.51644	0.230479	0.79	0.0735041	0.707263	0.79
2050	220	-0.529844	-0.49753	0.683652	0.33273	0.732691	0.688756	0.702645	0.787231	0.770688	0.276872	0.720473	0.634465	-0.387581	-0.0736931	0.153894	0.0164872	0.685489	0.773031	0.697046	0.602312	0.516693	0.247227	0.79	0.0915066	0.707336	0.79
2050	240	-0.509708	-0.480263	0.683652	0.341203	0.732691	0.688756	0.703094	0.787502	0.770993	0.294523	0.721525	0.637708	-0.370833	-0.0569451	0.170642	0.0346514	0.685489	0.773031	0.697073	0.602312	0.516779	0.263975	0.79	0.109518	0.707361	0.79
2050	260	-0.491813	-0.463168	0.683652	0.358059	0.732691	0.688821	0.703992	0.788042	0.771603	0.313077	0.721951	0.639021	-0.354085	-0.0401972	0.18739	0.054232	0.685489	0.773031	0.697084	0.602312	0.516817	0.280723	0.79	0.126702	0.707372	0.79
2050	280	-0.474242	-0.44596	0.683897	0.374807	0.732862	0.688821	0.703992	0.788042	0.771603	0.329825	0.722323	0.640164	-0.337337	-0.0234492	0.204138	0.0722373	0.685489	0.773031	0.697096	0.602312	0.516856	0.297471	0.79	0.143888	0.707383	0.79
2050	300	-0.456892	-0.428926	0.684114	0.391555	0.733054	0.688821	0.703992	0.788042	0.771603	0.346573	0.722548	0.640859	-0.320589	-0.00670118	0.220886	0.0889853	0.688668	0.773031	0.697106	0.602312	0.516889	0.314219	0.79	0.160895	0.707393	0.79
2050	320	-0.439781	-0.411959	0.684603	0.408303	0.733247	0.688821	0.703992	0.788042	0.771603	0.363321	0.722742	0.641456	-0.303841	0.0100468	0.237634	0.105733	0.688668	0.773031	0.697112	0.602312	0.516908	0.330967	0.79	0.177878	0.707398	0.79
2050	340	-0.422802	-0.395027	0.684603	0.425302	0.73344	0.68897	0.703992	0.788042	0.771603	0.380069	0.722837	0.641747	-0.287093	0.0267948	0.254382	0.122481	0.688668	0.773031	0.697116	0.602312	0.516922	0.347715	0.79	0.194757	0.707402	0.79
2050	360	-0.405628	-0.37813	0.684603	0.44205	0.73344	0.68897	0.704464	0.788326	0.771924	0.397767	0.722988	0.642213	-0.270345	0.0435428	0.27113	0.139229	0.688668	0.773031	0.69712	0.602312	0.519324	0.364463	0.79	0.211622	0.707406	0.79
2050	380	-0.388611	-0.361258	0.684603	0.458951	0.73344	0.689061	0.704464	0.788326	0.771924	0.414515	0.72312	0.642621	-0.248246	0.0602908	0.287878	0.157394	0.688668	0.773031	0.699503	0.602312	0.539375	0.381211	0.79	0.228525	0.709677	0.79
2050	400	-0.371634	-0.344428	0.684603	0.475803	0.73344	0.689123	0.704464	0.788326	0.771924	0.431263	0.723217	0.642921	-0.230797	0.0770387	0.304626	0.174142	0.688668	0.773031	0.699506	0.602312	0.556127	0.397959	0.79	0.245401	0.70968	0.79
2050	420	-0.35475	-0.327578	0.684603	0.492551	0.73344	0.689123	0.704773	0.788512	0.772134	0.448632	0.723273	0.643092	-0.2119	0.0937867	0.321374	0.19089	0.688668	0.773031	0.699508	0.60555	0.572878	0.414707	0.79	0.262202	0.709681	0.79
2050	440	-0.337821	-0.310758	0.684847	0.50934	0.73344	0.689147	0.704773	0.788512	0.772134	0.46538	0.723348	0.643323	-0.195152	0.110535	0.338122	0.207637	0.701023	0.773031	0.69951	0.622298	0.589629	0.431455	0.79	0.279013	0.709684	0.79
2050	460	-0.320925	-0.293931	0.684847	0.526088	0.733633	0.689147	0.704773	0.788512	0.772134	0.482128	0.723412	0.656413	-0.178404	0.127283	0.35487	0.314103	0.701436	0.773031	0.699528	0.639046	0.606402	0.448203	0.79	0.295803	0.7097	0.79
2050	480	-0.311044	-0.284058	0.684847	0.535884	0.733633	0.689147	0.705468	0.788931	0.772607	0.493323	0.72344	0.666245	-0.168608	0.137079	0.364666	0.323899	0.701436	0.773031	0.699529	0.648842	0.616199	0.457999	0.79	0.305639	0.709701	0.79
2050	500	-0.310977	-0.284009	0.715824	0.537712	0.733633	0.690237	0.705816	0.78914	0.772844	0.494023	0.724613	0.667768	-0.168608	0.147869	0.372301	0.323899	0.701436	0.773031	0.69953	0.648842	0.616201	0.457999	0.79	0.305702	0.709703	0.79
2050	520	-0.310893	-0.283926	0.715824	0.538029	0.733633	0.690426	0.706015	0.78926	0.772979	0.494422	0.724645	0.66781	-0.168608	0.147869	0.372301	0.323899	0.701436	0.773031	0.699532	0.648842	0.616203	0.457999	0.79	0.305745	0.709704	0.79
2050	540	-0.310813	-0.28386	0.715824	0.540355	0.733633	0.691812	0.706085	0.789302	0.773026	0.494562	0.724672	0.667845	-0.0341002	0.169573	0.387656	0.323899	0.703129	0.773031	0.70667	0.648842	0.626099	0.457999	0.79	0.305787	0.716505	0.79
2050	560	-0.310773	-0.283813	0.715824	0.540355	0.733633	0.691812	0.71106	0.79	0.776409	0.504571	0.724686	0.667862	-0.0341002	0.187105	0.400061	0.323899	0.70407	0.79	0.70792	0.682726	0.627833	0.457999	0.79	0.434475	0.717697	0.79
2050	580	-0.310713	-0.283741	0.715824	0.555095	0.758049	0.700596	0.711095	0.79	0.776432	0.504641	0.724706	0.667889	-0.0336543	0.203907	0.411948	0.323899	0.70407	0.79	0.712242	0.682726	0.633825	0.457999	0.79	0.434512	0.721815	0.79
2050	600	-0.190782	-0.283701	0.730171	0.574174	0.769357	0.711967	0.725266	0.79	0.786067	0.533146	0.727369	0.671346	0.028644	0.243053	0.439645	0.365453	0.717742	0.79	0.728908	0.69842	0.65693	0.522518	0.79	0.49413	0.737695	0.79
2050	620	-0.190741	-0.283657	0.730171	0.587957	0.769357	0.72018	0.730051	0.79	0.789321	0.542772	0.729515	0.674132	0.028644	0.246885	0.442356	0.365453	0.724041	0.79	0.728939	0.69949	0.656973	0.522518	0.79	0.494143	0.737725	0.79
2050	640	-0.190731	-0.283631	0.730171	0.587957	0.769357	0.72018	0.738976	0.79	0.79	0.560724	0.72986	0.67458	0.028644	0.246885	0.442356	0.365453	0.726035	0.79	0.72894	0.69949	0.656974	0.522518	0.79	0.494149	0.737725	0.79
2050	660	-0.190702	-0.283605	0.730171	0.588956	0.769357	0.720776	0.742713	0.79	0.79	0.568241	0.729875	0.674599	0.028644	0.246885	0.442356	0.365453	0.730674	0.79	0.72894	0.7005	0.656975	0.522518	0.79	0.494166	0.737726	0.79
2050	680	-0.190669	-0.283581	0.730171	0.588956	0.769357	0.720776	0.743061	0.79	0.79	0.56894	0.729904	0.674637	0.028644	0.246885	0.442356	0.365453	0.730674	0.79	0.729277	0.7005	0.657442	0.522518	0.79	0.494179	0.738047	0.79
2050	700	-0.19065	-0.283553	0.730171	0.588956	0.769357	0.720776	0.743061	0.79	0.79	0.56894	0.729912	0.674647	0.028644	0.246885	0.442356	0.365453	0.730674	0.79	0.7293	0.7005	0.657473	0.522518	0.79	0.494188	0.738068	0.79
2050	720	-0.190616	-0.283522	0.730171	0.588956	0.769357	0.720776	0.743061	0.79	0.79	0.56894	0.73004	0.674813	0.028644	0.246885	0.442356	0.365453	0.73096	0.79	0.729301	0.7005	0.657474	0.522518	0.79	0.4942	0.738069	0.79
2050	740	-0.190601	-0.283499	0.730171	0.588956	0.769357	0.720776	0.743061	0.79	0.79	0.56894	0.730045	0.674819	0.028644	0.246885	0.442356	0.365453	0.73096	0.79	0.729301	0.7005	0.657475	0.522518	0.79	0.494207	0.738069	0.79
2050	760	-0.161828	-0.283481	0.733613	0.591177	0.770714	0.722099	0.744479	0.79	0.79	0.571793	0.730295	0.675144	0.0361167	0.253833	0.447272	0.375421	0.733375	0.79	0.731609	0.704295	0.660675	0.524968	0.79	0.501362	0.740269	0.79
2050	780	-0.133055	-0.283463	0.737054	0.593399	0.77207	0.723423	0.745897	0.79	0.79	0.574645	0.730545	0.675469	0.0435893	0.260782	0.452188	0.38539	0.73579	0.79	0.733918	0.708089	0.663875	0.527417	0.79	0.508516	0.742468	0.79
2050	800	-0.104281	-0.283444	0.740496	0.59562	0.773427	0.724747	0.747315	0.79	0.79	0.577497	0.730795	0.675794	0.051062	0.26773	0.457105	0.395358	0.738206	0.79	0.736226	0.711884	0.667076	0.529867	0.79	0.51567	0.744668	0.79
2050	820	-0.075508	-0.283426	0.743938	0.597841	0.774783	0.726071	0.748733	0.79	0.79	0.58035	0.731045	0.676119	0.0585346	0.274679	0.462021	0.405327	0.740621	0.79	0.738535	0.715679	0.670276	0.532317	0.79	0.522825	0.746867	0.79
2050	840	-0.0467346	-0.283408	0.74738	0.600063	0.776139	0.727395	0.750151	0.79	0.79	0.583202	0.731296	0.676444	0.0660073	0.281628	0.466937	0.415296	0.743036	0.79	0.740843	0.719473	0.673476	0.534767	0.79	0.529979	0.749067	0.79
2050	860	-0.0179613	-0.283389	0.750822	0.602284	0.777496	0.728718	0.751569	0.79	0.79	0.586054	0.731546	0.676768	0.0734799	0.288576	0.471853	0.425264	0.745451	0.79	0.743152	0.723268	0.676677	0.537216	0.79	0.537133	0.751266	0.79
2050	880	0.0108121	-0.283371	0.754263	0.604505	0.778852	0.730042	0.752987	0.79	0.79	0.588907	0.731796	0.677093	0.0809526	0.295525	0.476769	0.435233	0.747867	0.79	0.74546	0.727063	0.679877	0.539666	0.79	0.544288	0.753466	0.79
2050	900	0.0395855	-0.283352	0.757705	0.606727	0.780209	0.731366	0.754405	0.79	0.79	0.591759	0.732046	0.677418	0.0884252	0.302473	0.481685	0.445201	0.750282	0.79	0.747768	0.730857	0.683077	0.542116	0.79	0.551442	0.755666	0.79
2050	920	0.0683588	-0.283334	0.761147	0.608948	0.781565	0.73269	0.755823	0.79	0.79	0.594612	0.732296	0.677743	0.0958979	0.309422	0.486602	0.45517	0.752697	0.79	0.750077	0.734652	0.686278	0.544566	0.79	0.558596	0.757865	0.79
2050	940	0.0971322	-0.283316	0.764589	0.611169	0.782922	0.734014	0.757241	0.79	0.79	0.597464	0.732547	0.678068	0.103371	0.31637	0.491518	0.465139	0.755112	0.79	0.752385	0.738447	0.689478	0.547015	0.79	0.565751	0.760065	0.79
2050	960	0.125906	-0.283297	0.768031	0.613391	0.784278	0.735337	0.758659	0.79	0.79	0.600316	0.732797	0.678393	0.110843	0.323319	0.496434	0.475107	0.757527	0.79	0.754694	0.742241	0.692678	0.549465	0.79	0.572905	0.762264	0.79
2050	980	0.154679	-0.283279	0.771473	0.615612	0.785635	0.736661	0.760077	0.79	0.79	0.603169	0.733047	0.678717	0.118316	0.330267	0.50135	0.485076	0.759943	0.79	0.757002	0.746036	0.695879	0.551915	0.79	0.580059	0.764464	0.79
2050	1000	0.183452	-0.283261	0.774914	0.617833	0.786991	0.737985	0.761495	0.79	0.79	0.606021	0.733297	0.679042	0.125788	0.337216	0.506266	0.495044	0.762358	0.79	0.75931	0.749831	0.699079	0.554365	0.79	0.587214	0.766663	0.79
2050	1020	0.212226	-0.283242	0.778356	0.620055	0.788348	0.739309	0.762913	0.79	0.79	0.608874	0.733548	0.679367	0.133261	0.344164	0.511183	0.505013	0.764773	0.79	0.761619	0.753625	0.702279	0.556814	0.79	0.594368	0.768863	0.79
2050	1040	0.240999	-0.283224	0.781798	0.622276	0.789704	0.740633	0.764331	0.79	0.79	0.611726	0.733798	0.679692	0.140734	0.351113	0.516099	0.514982	0.767188	0.79	0.763927	0.75742	0.70548	0.559264	0.79	0.601522	0.771062	0.79
2050	1060	0.269772	-0.283206	0.78524	0.624497	0.79	0.741956	0.765749	0.79	0.79	0.614578	0.734048	0.680017	0.148206	0.358061	0.521015	0.52495	0.769604	0.79	0.766236	0.761215	0.70868	0.561714	0.79	0.608677	0.773262	0.79
2050	1080	0.298546	-0.283187	0.788682	0.626719	0.79	0.74328	0.767167	0.79	0.79	0.617431	0.734298	0.680342	0.155679	0.36501	0.525931	0.534919	0.772019	0.79	0.768544	0.765009	0.71188	0.564164	0.79	0.615831	0.775461	0.79
2050	1100	0.327319	-0.283169	0.79	0.62894	0.79	0.744604	0.768585	0.79	0.79	0.620283	0.734548	0.680667	0.163152	0.371958	0.530847	0.544887	0.774434	0.79	0.770853	0.768804	0.715081	0.566613	0.79	0.622985	0.777661	0.79
2050	1120	0.327323	-0.283163	0.79	0.630784	0.79	0.745703	0.769971	0.79	0.79	0.62307	0.734794	0.680986	0.170624	0.373348	0.531831	0.544887	0.775179	0.79	0.771056	0.768804	0.715363	0.569063	0.79	0.622988	0.777855	0.79
2050	1140	0.327327	-0.283157	0.79	0.632629	0.79	0.746802	0.771357	0.79	0.79	0.625858	0.73504	0.681305	0.178097	0.374738	0.532814	0.544887	0.775925	0.79	0.771259	0.768804	0.715645	0.571513	0.79	0.62299	0.778049	0.79
2050	1160	0.327331	-0.283151	0.79	0.634474	0.79	0.747902	0.772742	0.79	0.79	0.628645	0.735286	0.681625	0.18557	0.376128	0.533798	0.544887	0.77667	0.79	0.771463	0.768804	0.715927	0.573963	0.79	0.622992	0.778242	0.79
2050	1180	0.327335	-0.283144	0.79	0.636318	0.79	0.749001	0.774128	0.79	0.79	0.631432	0.735532	0.681944	0.193042	0.377519	0.534781	0.544887	0.777415	0.79	0.771666	0.768804	0.716209	0.576412	0.79	0.622994	0.778436	0.79
2050	1200	0.327339	-0.283138	0.79	0.638163	0.79	0.7501	0.775514	0.79	0.79	0.634219	0.735778	0.682263	0.200515	0.378909	0.535765	0.544887	0.778161	0.79	0.77187	0.768804	0.716491	0.578862	0.79	0.622996	0.77863	0.79
2050	1220	0.327343	-0.283132	0.79	0.640007	0.79	0.7512	0.776899	0.79	0.79	0.637007	0.736024	0.682583	0.207988	0.380299	0.536748	0.544887	0.778906	0.79	0.772073	0.768804	0.716773	0.581312	0.79	0.622998	0.778824	0.79
2050	1240	0.327347	-0.283126	0.79	0.641852	0.79	0.752299	0.778285	0.79	0.79	0.639794	0.73627	0.682902	0.21546	0.381689	0.537732	0.544887	0.779651	0.79	0.772276	0.768804	0.717055	0.583762	0.79	0.623001	0.779018	0.79
2050	1260	0.327351	-0.28312	0.79	0.643697	0.79	0.753398	0.77967	0.79	0.79	0.642581	0.736516	0.683221	0.222933	0.383079	0.538715	0.544887	0.780397	0.79	0.77248	0.768804	0.717337	0.586211	0.79	0.623003	0.779211	0.79
2050	1280	0.327355	-0.283114	0.79	0.645541	0.79	0.754497	0.781056	0.79	0.79	0.645368	0.736762	0.683541	0.230406	0.384469	0.539699	0.544887	0.781142	0.79	0.772683	0.768804	0.717619	0.588661	0.79	0.623005	0.779405	0.79
2050	1300	0.327359	-0.283108	0.79	0.647386	0.79	0.755597	0.782442	0.79	0.79	0.648155	0.737008	0.68386	0.237878	0.385859	0.540682	0.544887	0.781887	0.79	0.772887	0.768804	0.717901	0.591111	0.79	0.623007	0.779599	0.79
2050	1320	0.327363	-0.283102	0.79	0.64923	0.79	0.756696	0.783827	0.79	0.79	0.650943	0.737254	0.68418	0.245351	0.387249	0.541666	0.544887	0.782632	0.79	0.77309	0.768804	0.718183	0.593561	0.79	0.623009	0.779793	0.79
2050	1340	0.327367	-0.283096	0.79	0.651075	0.79	0.757795	0.785213	0.79	0.79	0.65373	0.7375	0.684499	0.252824	0.388639	0.542649	0.544887	0.783378	0.79	0.773294	0.768804	0.718465	0.59601	0.79	0.623011	0.779987	0.79
2050	1360	0.327371	-0.28309	0.79	0.652919	0.79	0.758894	0.786599	0.79	0.79	0.656517	0.737746	0.684818	0.260296	0.390029	0.543633	0.544887	0.784123	0.79	0.773497	0.768804	0.718747	0.59846	0.79	0.623014	0.780181	0.79
2050	1380	0.327375	-0.283084	0.79	0.654764	0.79	0.759994	0.787984	0.79	0.79	0.659304	0.737992	0.685138	0.267769	0.391419	0.544616	0.544887	0.784868	0.79	0.7737	0.768804	0.719029	0.60091	0.79	0.623016	0.780374	0.79
2050	1400	0.327379	-0.283078	0.79	0.656609	0.79	0.761093	0.78937	0.79	0.79	0.662092	0.738238	0.685457	0.275242	0.392809	0.5456	0.544887	0.785614	0.79	0.773904	0.768804	0.719311	0.60336	0.79	0.623018	0.780568	0.79
2050	1420	0.327383	-0.283071	0.79	0.658453	0.79	0.762192	0.79	0.79	0.79	0.664879	0.738484	0.685776	0.282714	0.394199	0.546583	0.544887	0.786359	0.79	0.774107	0.768804	0.719593	0.605809	0.79	0.62302	0.780762	0.79
2050	1440	0.327387	-0.283065	0.79	0.660298	0.79	0.763292	0.79	0.79	0.79	0.667666	0.73873	0.686096	0.290187	0.395589	0.547567	0.544887	0.787104	0.79	0.774311	0.768804	0.719875	0.608259	0.79	0.623022	0.780956	0.79
2050	1460	0.327391	-0.283059	0.79	0.662142	0.79	0.764391	0.79	0.79	0.79	0.670453	0.738976	0.686415	0.297659	0.396979	0.54855	0.544887	0.78785	0.79	0.774514	0.768804	0.720157	0.610709	0.79	0.623024	0.78115	0.79
2050	1480	0.341734	-0.283057	0.79	0.664017	0.79	0.765508	0.79	0.79	0.79	0.673265	0.739167	0.686663	0.305111	0.398366	0.549531	0.544887	0.789475	0.79	0.775709	0.770681	0.721814	0.610709	0.79	0.630154	0.782289	0.79
2050	1500	0.356077	-0.283054	0.79	0.665892	0.79	0.766625	0.79	0.79	0.79	0.676077	0.739359	0.686912	0.312563	0.399752	0.550512	0.544887	0.79	0.79	0.776905	0.772558	0.723471	0.610709	0.79	0.637283	0.783427	0.79
2050	1520	0.37042	-0.283052	0.79	0.667767	0.79	0.767743	0.79	0.79	0.79	0.678889	0.73955	0.68716	0.320015	0.401138	0.551493	0.544887	0.79	0.79	0.7781	0.774436	0.725128	0.610709	0.79	0.644412	0.784566	0.79
2050	1540	0.384762	-0.283049	0.79	0.669642	0.79	0.76886	0.79	0.79	0.79	0.681701	0.739741	0.687408	0.327467	0.402524	0.552473	0.544887	0.79	0.79	0.779295	0.776313	0.726785	0.610709	0.79	0.651541	0.785705	0.79
2050	1560	0.399105	-0.283046	0.79	0.671516	0.79	0.769977	0.79	0.79	0.79	0.684513	0.739932	0.687656	0.334919	0.40391	0.553454	0.544887	0.79	0.79	0.78049	0.77819	0.728442	0.610709	0.79	0.658671	0.786844	0.79
2050	1580	0.413448	-0.283044	0.79	0.673391	0.79	0.771095	0.79	0.79	0.79	0.687325	0.740124	0.687905	0.342371	0.405297	0.554435	0.544887	0.79	0.79	0.781686	0.780067	0.730099	0.610709	0.79	0.6658	0.787983	0.79
2050	1600	0.427791	-0.283041	0.79	0.675266	0.79	0.772212	0.79	0.79	0.79	0.690137	0.740315	0.688153	0.349823	0.406683	0.555416	0.544887	0.79	0.79	0.782881	0.781945	0.731756	0.610709	0.79	0.672929	0.789122	0.79
2050	1620	0.442134	-0.283039	0.79	0.677141	0.79	0.773329	0.79	0.79	0.79	0.692949	0.740506	0.688401	0.357275	0.408069	0.556396	0.544887	0.79	0.79	0.784076	0.783822	0.733413	0.610709	0.79	0.680058	0.79	0.79
2050	1640	0.456476	-0.283036	0.79	0.679016	0.79	0.774446	0.79	0.79	0.79	0.695761	0.740697	0.688649	0.364727	0.409455	0.557377	0.544887	0.79	0.79	0.785271	0.785699	0.73507	0.610709	0.79	0.687188	0.79	0.79
2050	1660	0.470819	-0.283034	0.79	0.680891	0.79	0.775564	0.79	0.79	0.79	0.698573	0.740888	0.688897	0.372179	0.410841	0.558358	0.544887	0.79	0.79	0.786466	0.787576	0.736727	0.610709	0.79	0.694317	0.79	0.79
2050	1680	0.485162	-0.283031	0.79	0.682765	0.79	0.776681	0.79	0.79	0.79	0.701385	0.74108	0.689146	0.379631	0.412228	0.559339	0.544887	0.79	0.79	0.787662	0.789454	0.738384	0.610709	0.79	0.701446	0.79	0.79
2050	1700	0.499505	-0.283028	0.79	0.68464	0.79	0.777798	0.79	0.79	0.79	0.704197	0.741271	0.689394	0.387083	0.413614	0.560319	0.544887	0.79	0.79	0.788857	0.79	0.740041	0.610709	0.79	0.708576	0.79	0.79
2050	1720	0.513847	-0.283026	0.79	0.686515	0.79	0.778916	0.79	0.79	0.79	0.707009	0.741462	0.689642	0.394535	0.415	0.5613	0.544887	0.79	0.79	0.79	0.79	0.741698	0.610709	0.79	0.715705	0.79	0.79
2050	1740	0.52819	-0.283023	0.79	0.68839	0.79	0.780033	0.79	0.79	0.79	0.709821	0.741653	0.68989	0.401987	0.416386	0.562281	0.544887	0.79	0.79	0.79	0.79	0.743356	0.610709	0.79	0.722834	0.79	0.79
2050	1760	0.542533	-0.283021	0.79	0.690265	0.79	0.78115	0.79	0.79	0.79	0.712633	0.741844	0.690139	0.409439	0.417772	0.563262	0.544887	0.79	0.79	0.79	0.79	0.745013	0.610709	0.79	0.729963	0.79	0.79
2050	1780	0.556876	-0.283018	0.79	0.69214	0.79	0.782268	0.79	0.79	0.79	0.715445	0.742036	0.690387	0.416891	0.419159	0.564242	0.544887	0.79	0.79	0.79	0.79	0.74667	0.610709	0.79	0.737093	0.79	0.79
2050	1800	0.571218	-0.283016	0.79	0.694014	0.79	0.783385	0.79	0.79	0.79	0.718257	0.742227	0.690635	0.424343	0.420545	0.565223	0.544887	0.79	0.79	0.79	0.79	0.748327	0.610709	0.79	0.744222	0.79	0.79
2050	1820	0.585561	-0.283013	0.79	0.695889	0.79	0.784502	0.79	0.79	0.79	0.721069	0.742418	0.690883	0.431795	0.421931	0.566204	0.544887	0.79	0.79	0.79	0.79	0.749984	0.610709	0.79	0.751351	0.79	0.79
2050	1840	0.599904	-0.283011	0.79	0.697764	0.79	0.785619	0.79	0.79	0.79	0.723881	0.742609	0.691132	0.439247	0.423317	0.567185	0.544887	0.79	0.79	0.79	0.79	0.751641	0.610709	0.79	0.75848	0.79	0.79
2050	1860	0.599905	-0.283008	0.79	0.697928	0.79	0.785717	0.79	0.79	0.79	0.723881	0.74261	0.691132	0.439247	0.426243	0.569255	0.550134	0.79	0.79	0.79	0.79	0.751653	0.613288	0.79	0.758481	0.79	0.79
2050	1880	0.599906	-0.283006	0.79	0.698092	0.79	0.785815	0.79	0.79	0.79	0.723881	0.742611	0.691133	0.439247	0.429168	0.571324	0.555381	0.79	0.79	0.79	0.79	0.751666	0.615866	0.79	0.758482	0.79	0.79
2050	1900	0.599907	-0.283004	0.79	0.698256	0.79	0.785913	0.79	0.79	0.79	0.723881	0.742611	0.691134	0.439247	0.432094	0.573394	0.560627	0.79	0.79	0.79	0.79	0.751679	0.618445	0.79	0.758482	0.79	0.79
2050	1920	0.599909	-0.283001	0.79	0.69842	0.79	0.786011	0.79	0.79	0.79	0.723881	0.742612	0.691135	0.439247	0.435019	0.575464	0.565874	0.79	0.79	0.79	0.79	0.751691	0.621024	0.79	0.758483	0.79	0.79
2050	1940	0.59991	-0.282999	0.79	0.698585	0.79	0.786109	0.79	0.79	0.79	0.723881	0.742613	0.691136	0.439247	0.437945	0.577534	0.571121	0.79	0.79	0.79	0.79	0.751704	0.623602	0.79	0.758483	0.79	0.79
2050	1960	0.599911	-0.282997	0.79	0.698749	0.79	0.786206	0.79	0.79	0.79	0.723881	0.742613	0.691137	0.439247	0.44087	0.579604	0.576367	0.79	0.79	0.79	0.79	0.751717	0.626181	0.79	0.758484	0.79	0.79
2050	1980	0.599912	-0.282995	0.79	0.698913	0.79	0.786304	0.79	0.79	0.79	0.723881	0.742614	0.691138	0.439247	0.443796	0.581674	0.581614	0.79	0.79	0.79	0.79	0.751729	0.62876	0.79	0.758485	0.79	0.79
2050	2000	0.599913	-0.282992	0.79	0.699077	0.79	0.786402	0.79	0.79	0.79	0.723881	0.742615	0.691139	0.439247	0.446721	0.583744	0.586861	0.79	0.79	0.79	0.79	0.751742	0.631338	0.79	0.758485	0.79	0.79
2050	2020	0.599914	-0.28299	0.79	0.699241	0.79	0.7865	0.79	0.79	0.79	0.723881	0.742615	0.69114	0.439247	0.449647	0.585813	0.592107	0.79	0.79	0.79	0.79	0.751755	0.633917	0.79	0.758486	0.79	0.79
2050	2040	0.599915	-0.282988	0.79	0.699405	0.79	0.786598	0.79	0.79	0.79	0.723881	0.742616	0.691141	0.439247	0.452572	0.587883	0.597354	0.79	0.79	0.79	0.79	0.751767	0.636496	0.79	0.758487	0.79	0.79
[truncated: 299 more rows]

## Sheet: CH4_manu_D
t	Implementation costs	Canada	USA	Mexico	Central America	Brazil	Rest of South-America	North Africa	West Africa	East Africa	South Africa	West Europe	Central Europe	Turkey	Ukraine	Kazachstan	Russia	Middle East	India	Korea	China+	South East Asia	Indonesia	Japan	Oceania	Rest of South Asia	Rest of South Africa
[truncated: 603 more rows]

[truncated: 38 more sheets: CH4_ngas_D, CH4_oilp_D, CH4_rice_D, CH4_sewa_D, N2O_adip_D, N2O_fert_D, N2O_manu_D, N2O_nitr_D, N2O_sewa_D, N2O_tran_D, CH4_coal_O, CH4_entf_O, CH4_land_O, CH4_manu_O, CH4_ngas_O, CH4_oilp_O, CH4_rice_O, CH4_sewa_O, N2O_adip_O, N2O_fert_O …]
